# Supplementary material for: Target mRNA abundance dilutes microRNA and siRNA activity
Source: PubMed Central journal article supplement — Mol Syst Biol. 2010 Apr 20;6:363. doi: 10.1038/msb.2010.24 (PMC2872614; doi:10.1038/msb.2010.24), 2010-04-20

# anderson.sirna-100 - CHIMERA\_H1

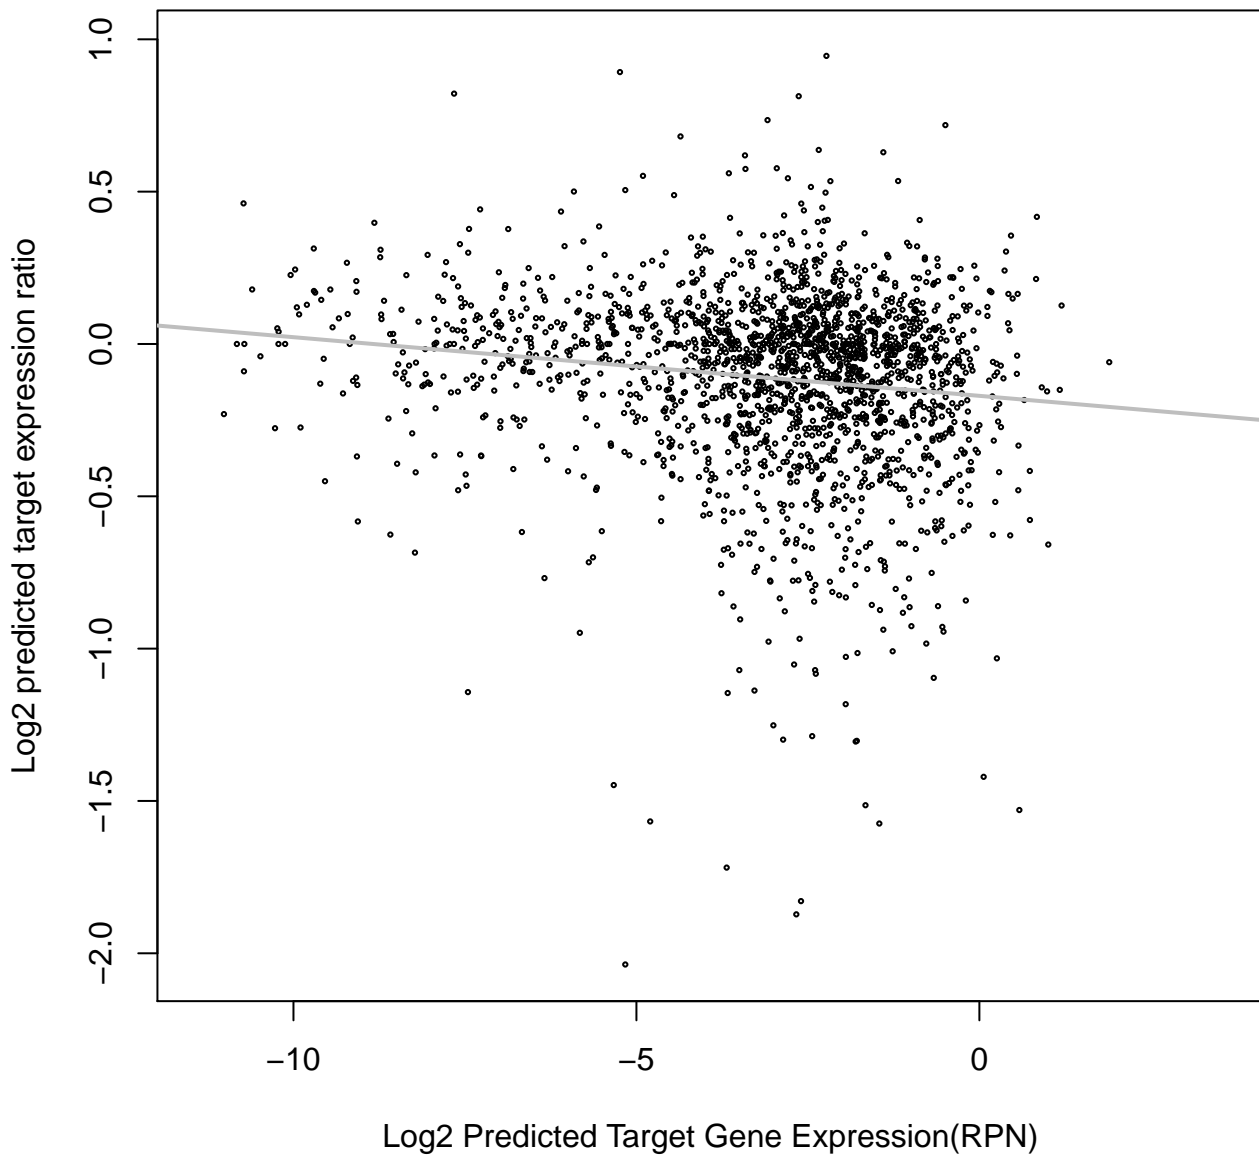

# anderson.sirna-101 - CHIMERA\_H2

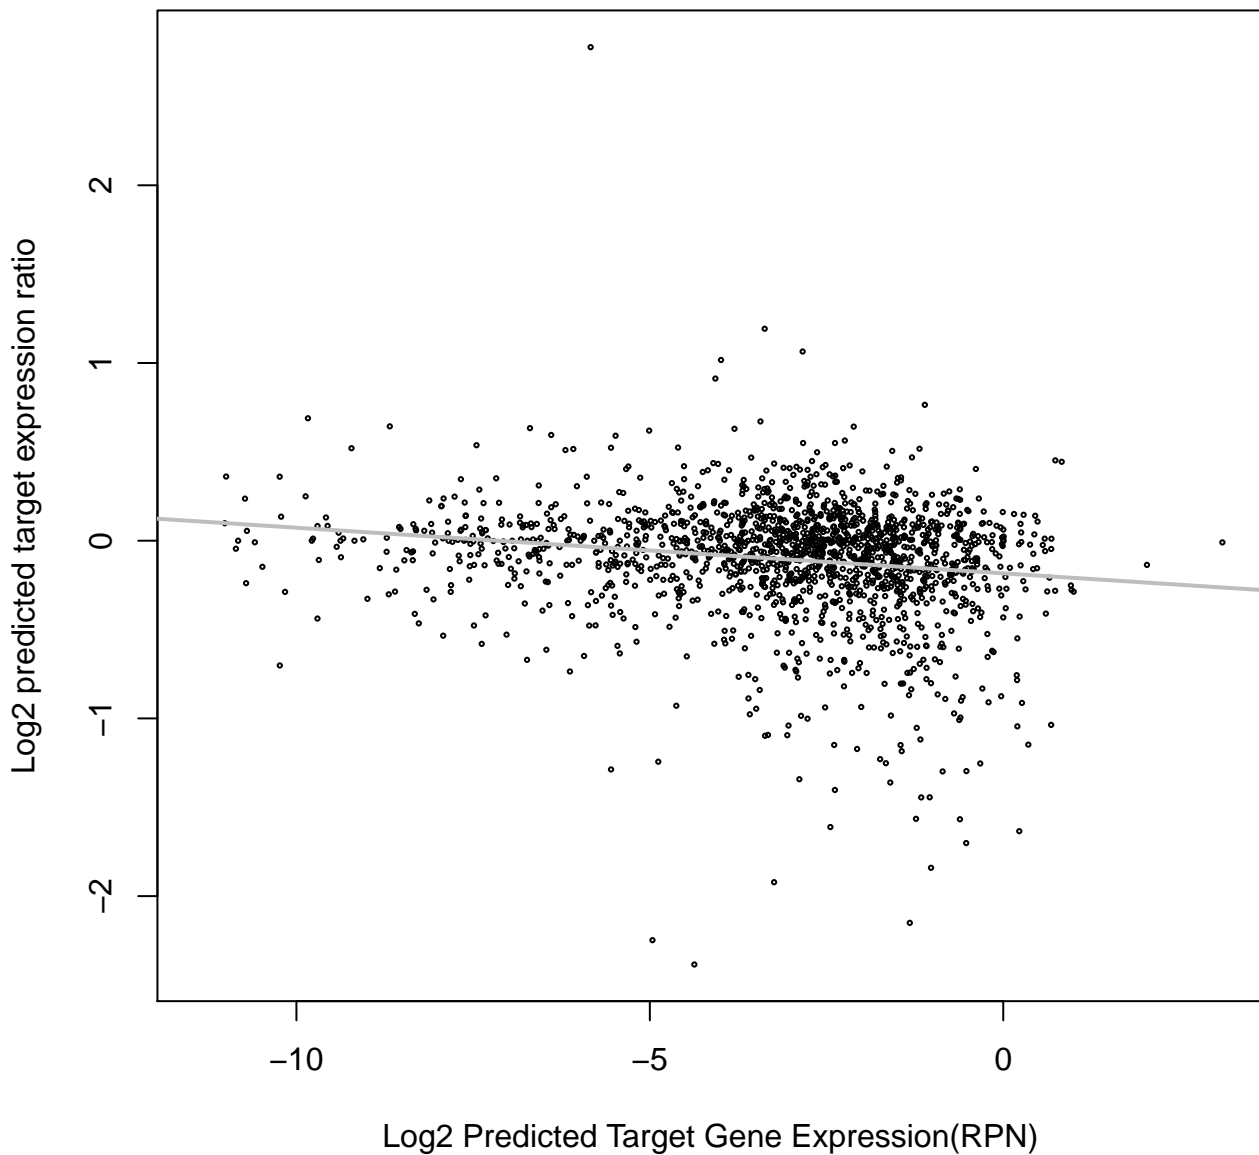

# anderson.sirna-102 - CHIMERA\_H3

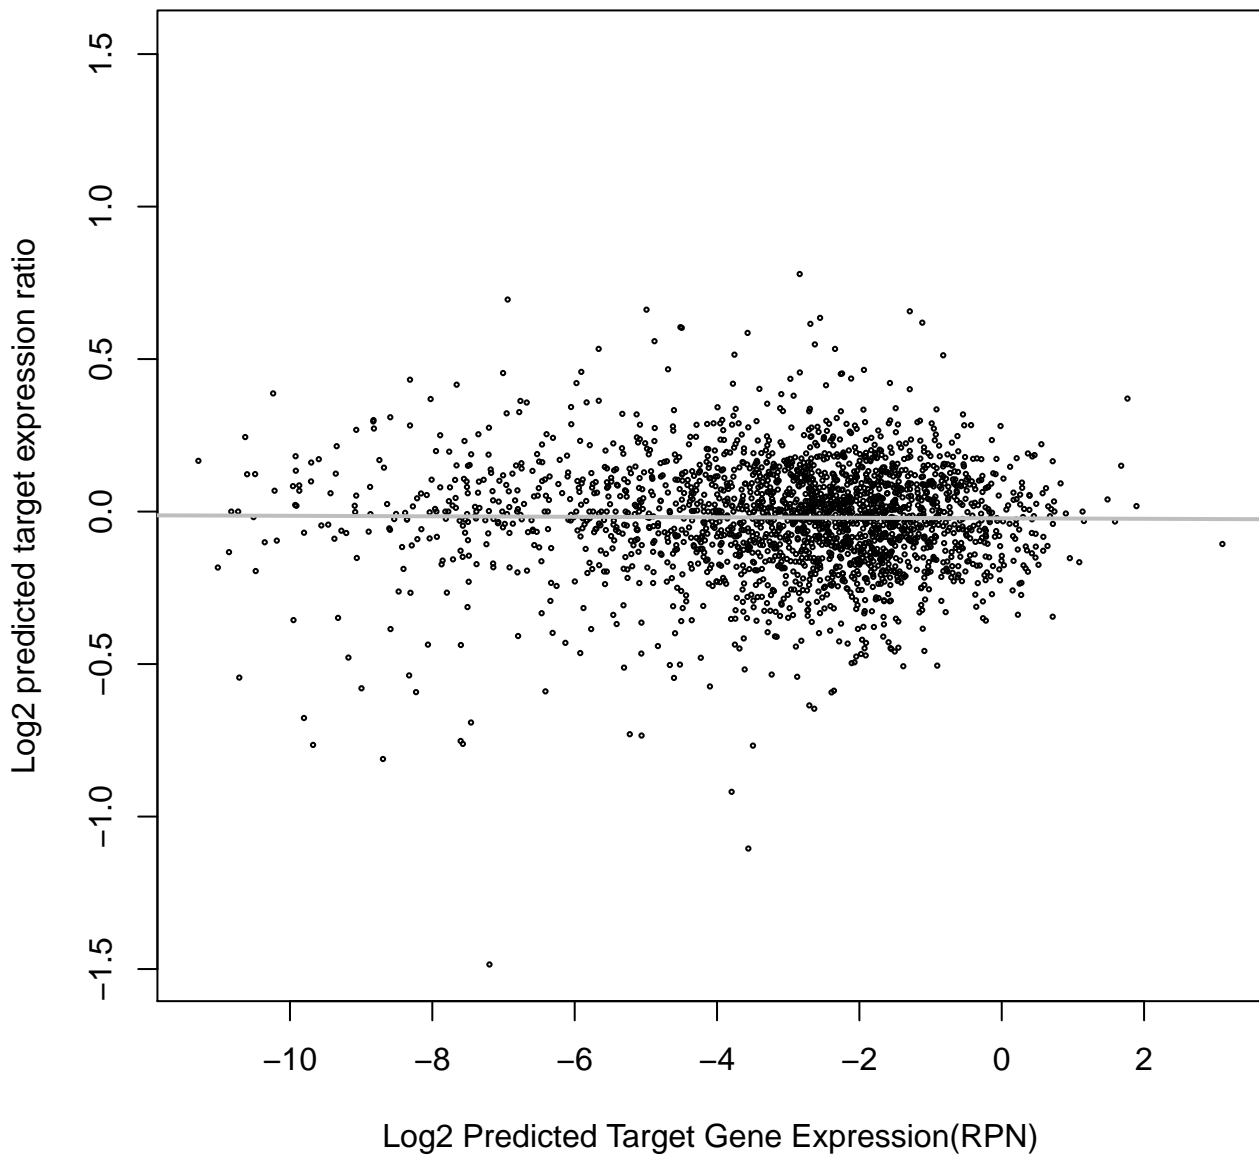

# anderson.sirna-103 - CHIMERA\_H4

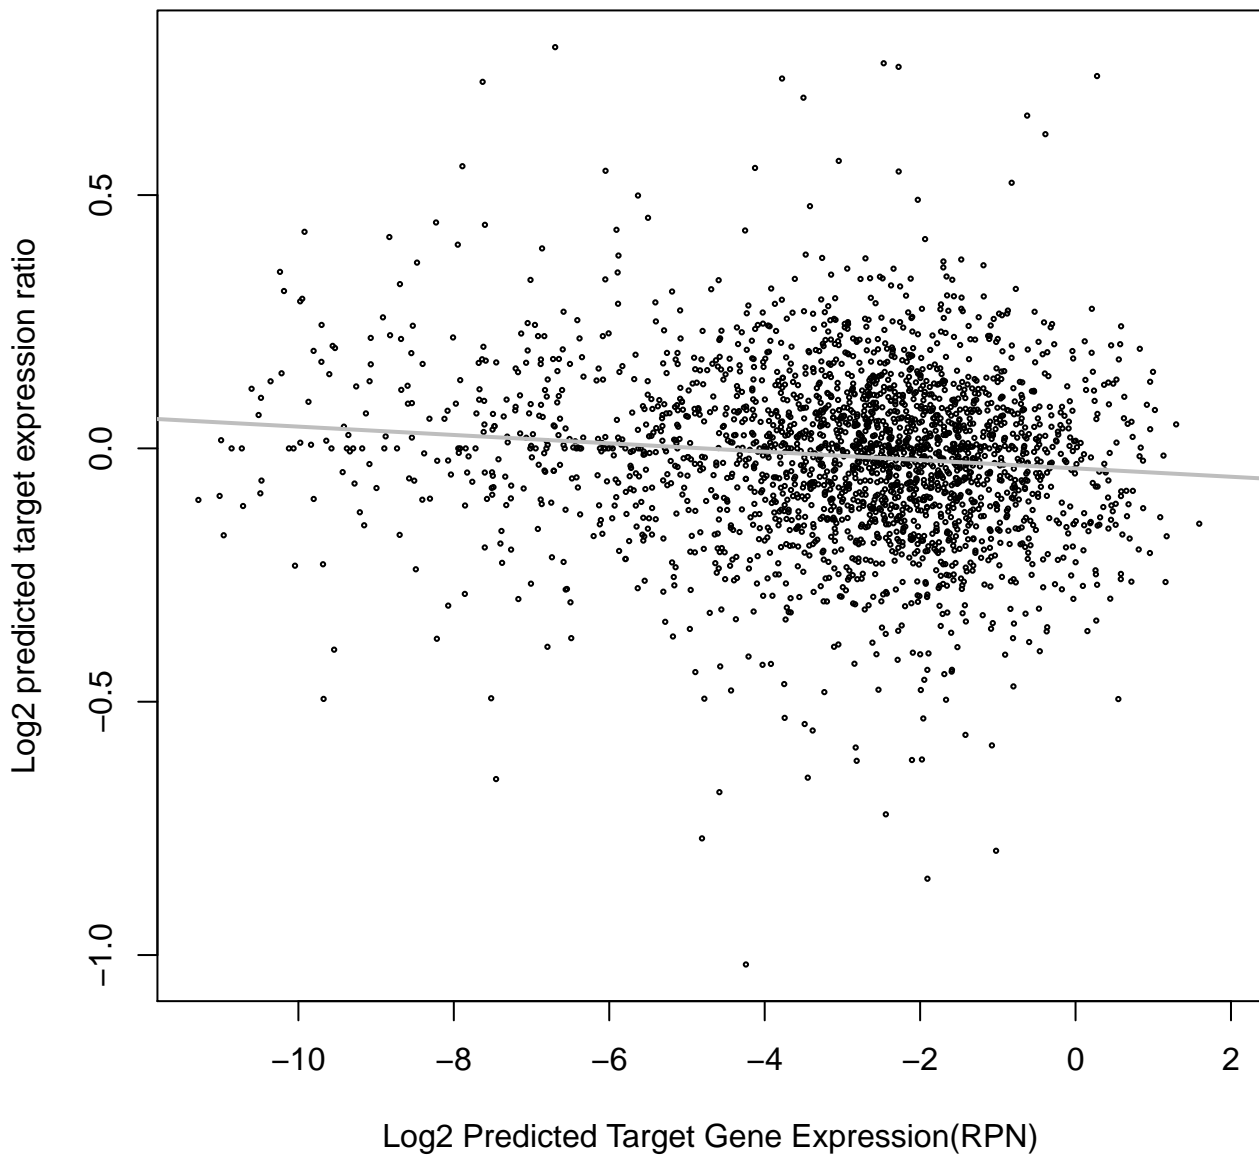

# anderson.sirna-104 - CHIMERA\_H5

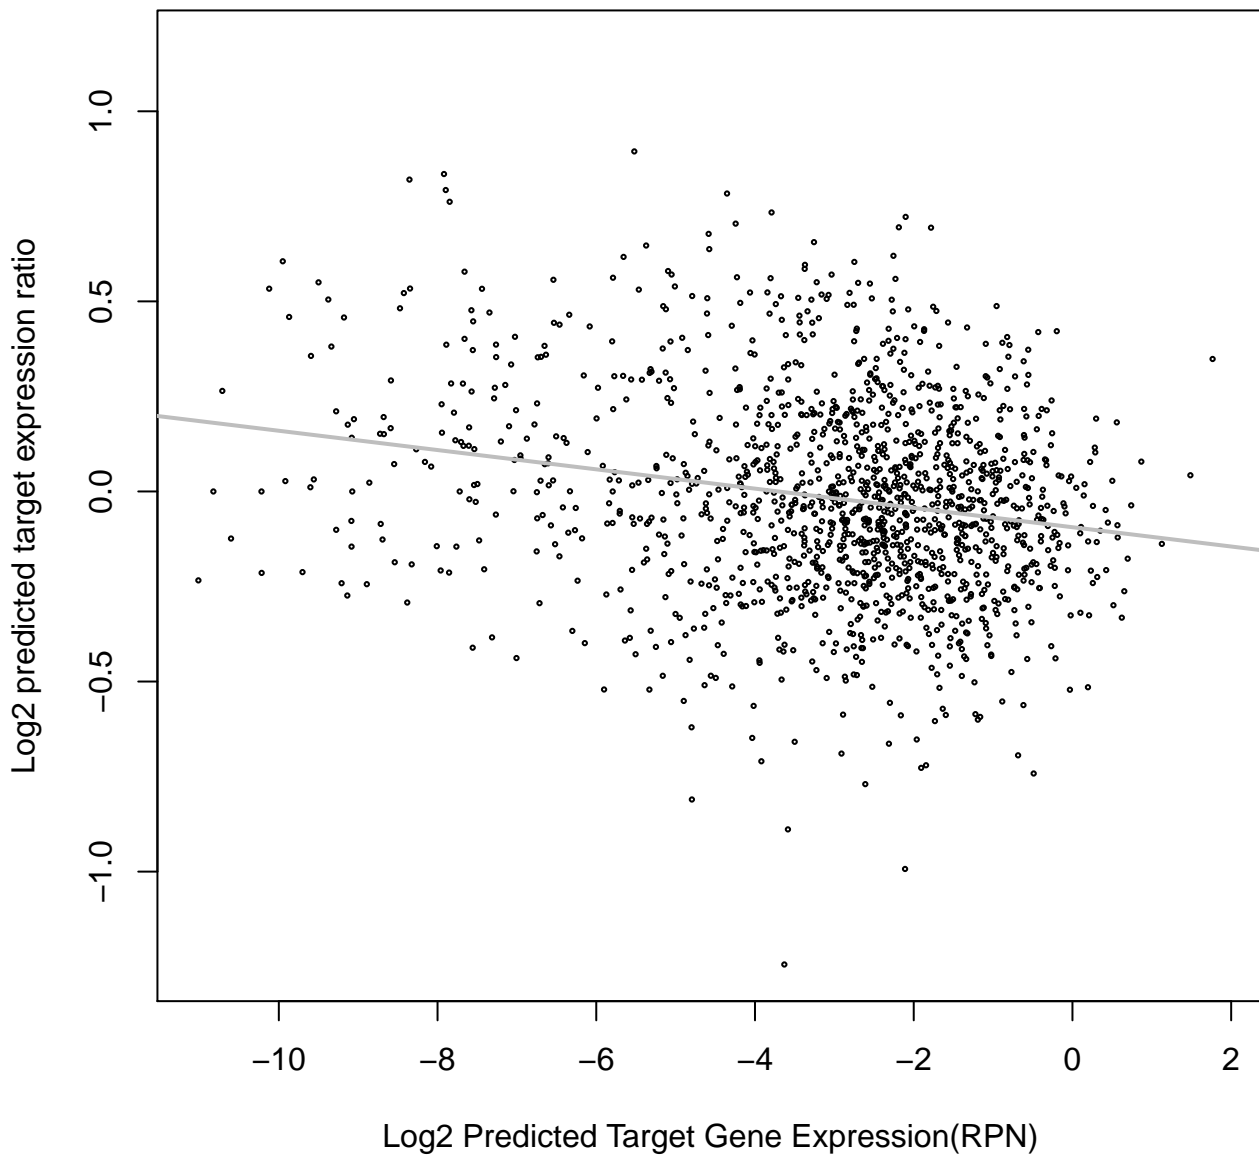

# anderson.sirna-105 - CHIMERA\_L1

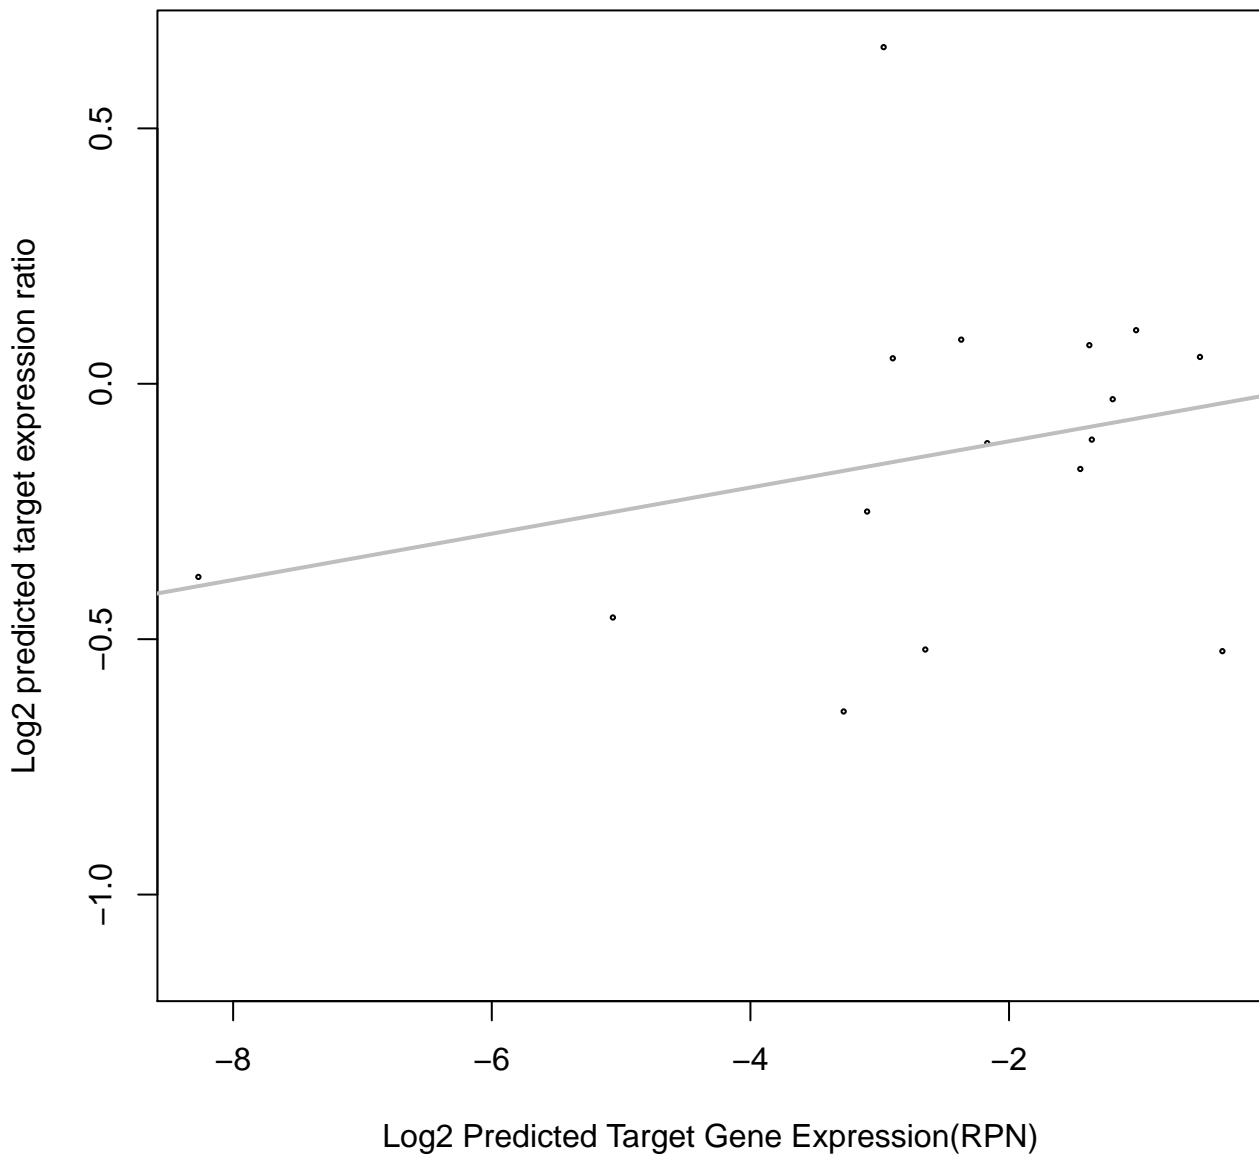

# anderson.sirna-106 - CHIMERA\_L2

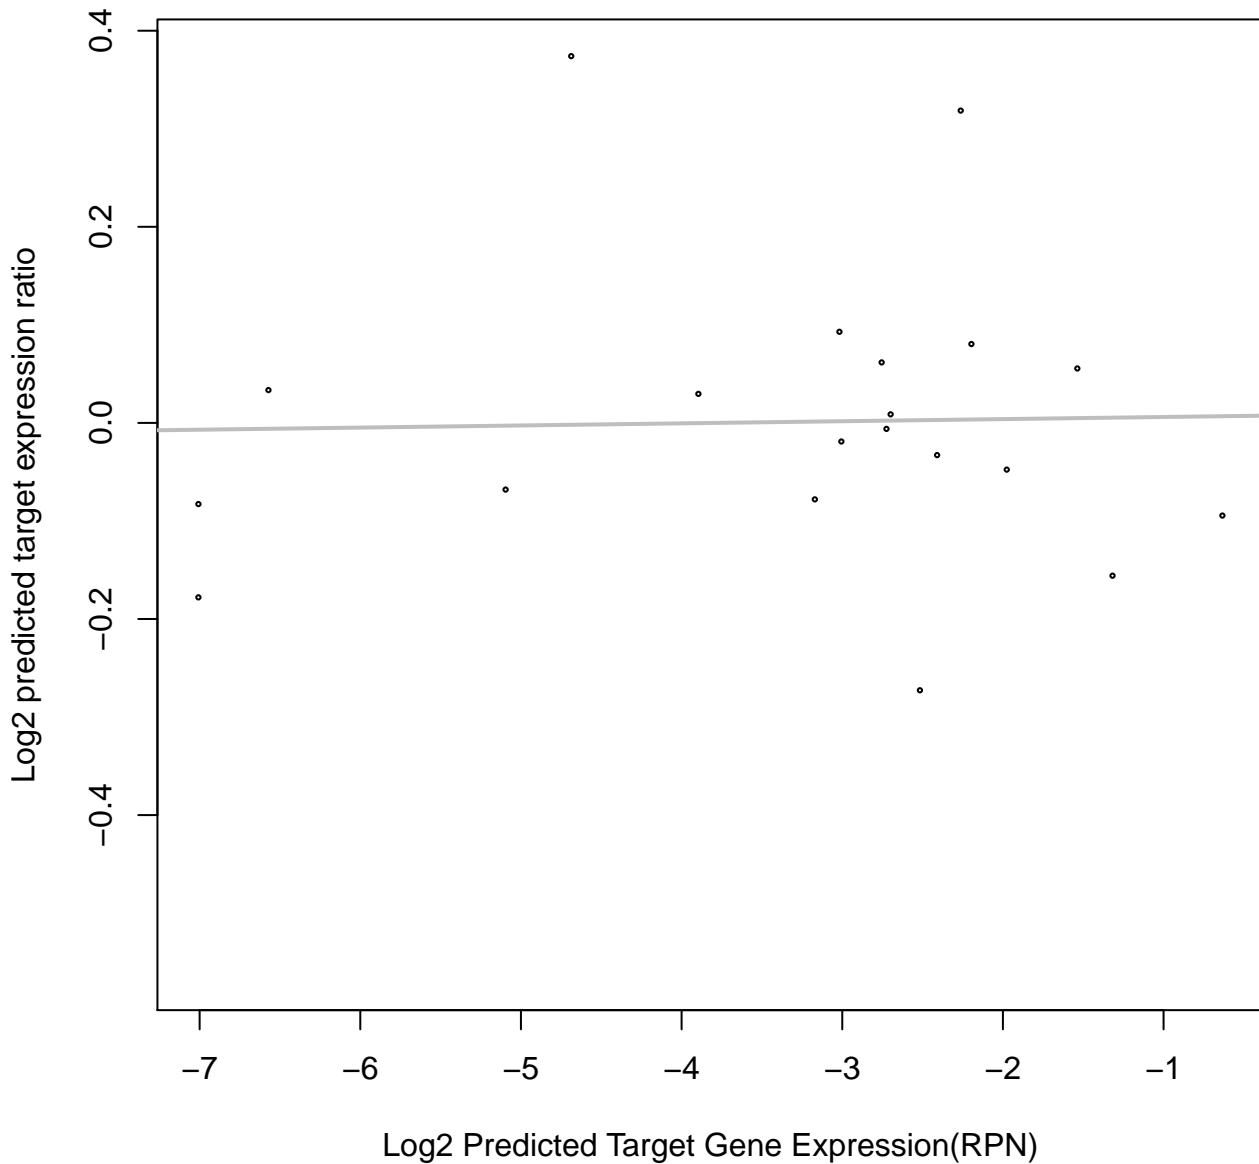

# anderson.sirna-107 - CHIMERA\_L3

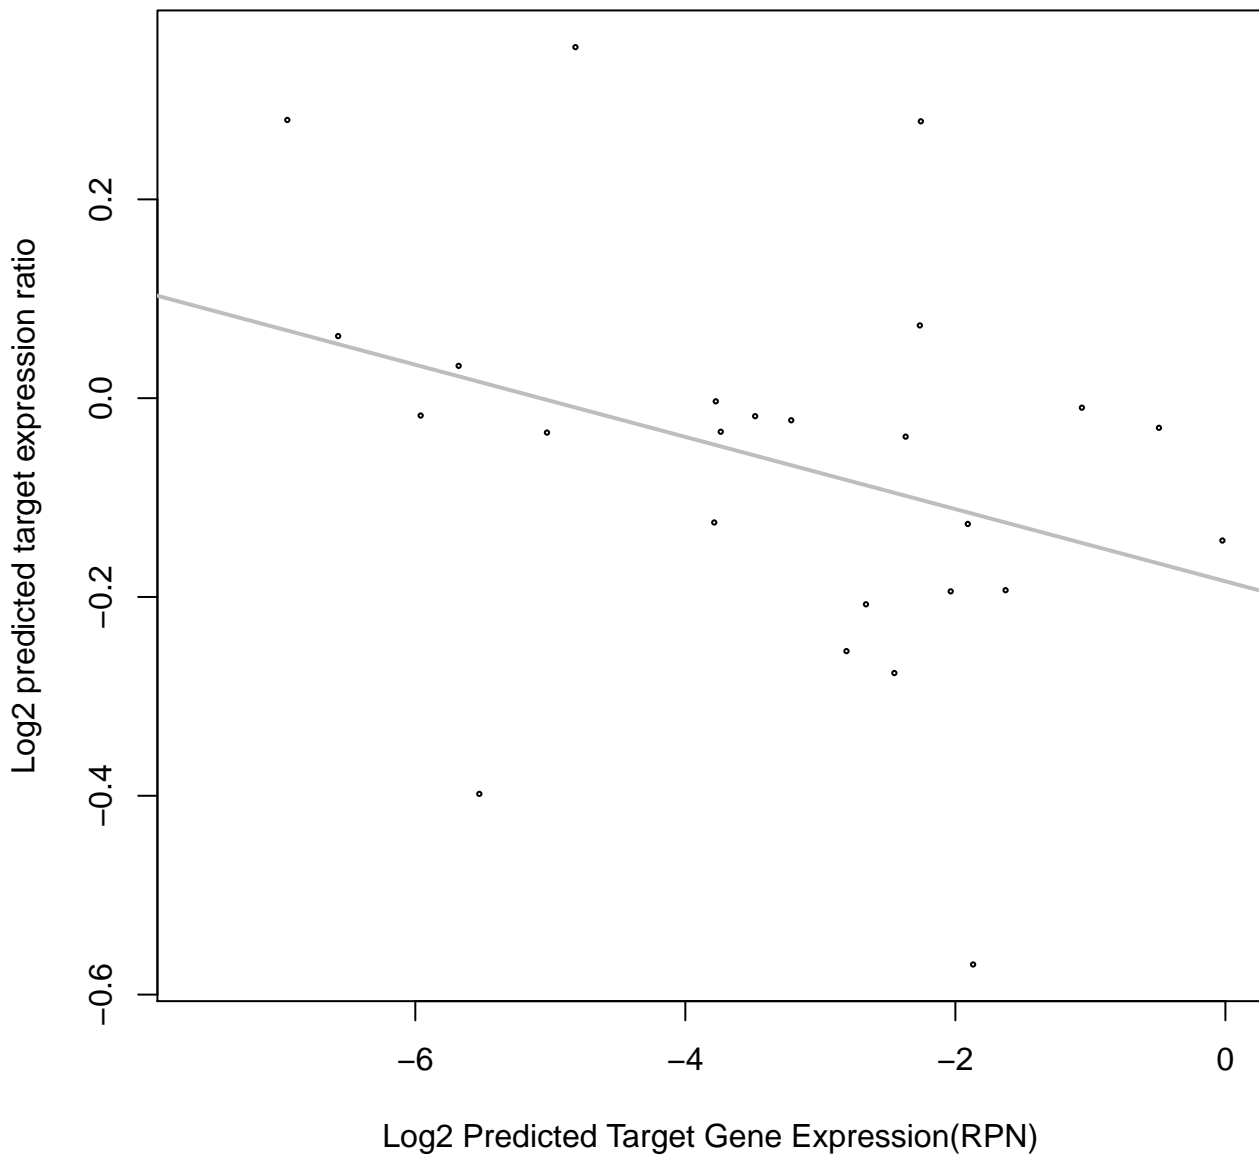



# anderson.sirna-108 - CHIMERA\_L4

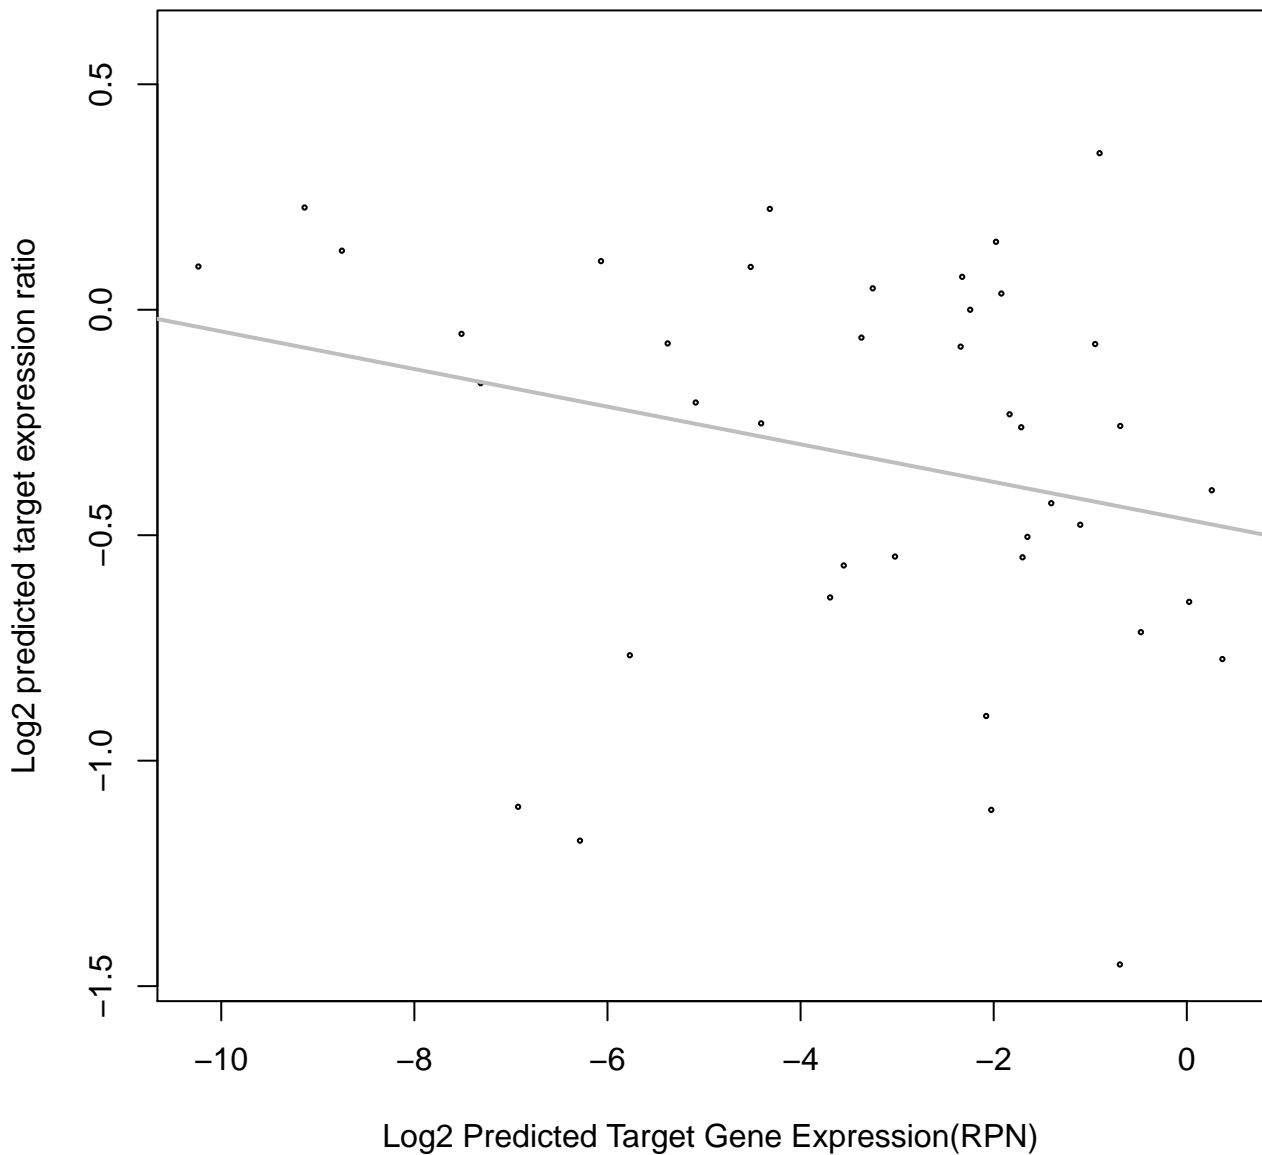

# anderson.sirna-109 - CHIMERA\_L5

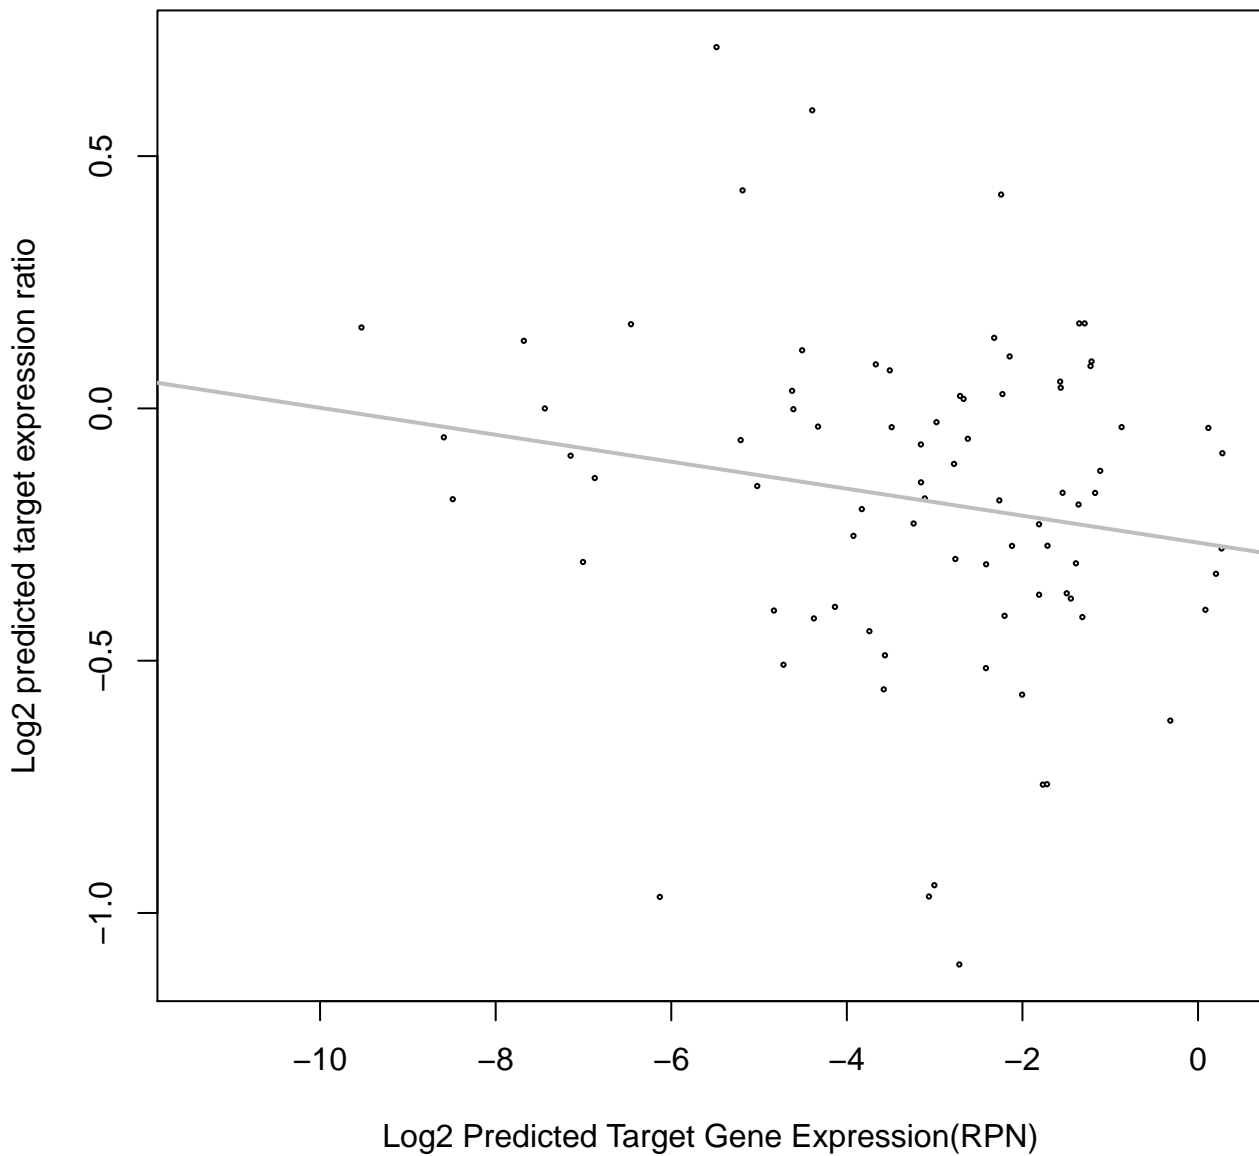

# anderson.sirna-110 - CHIMERA\_M1

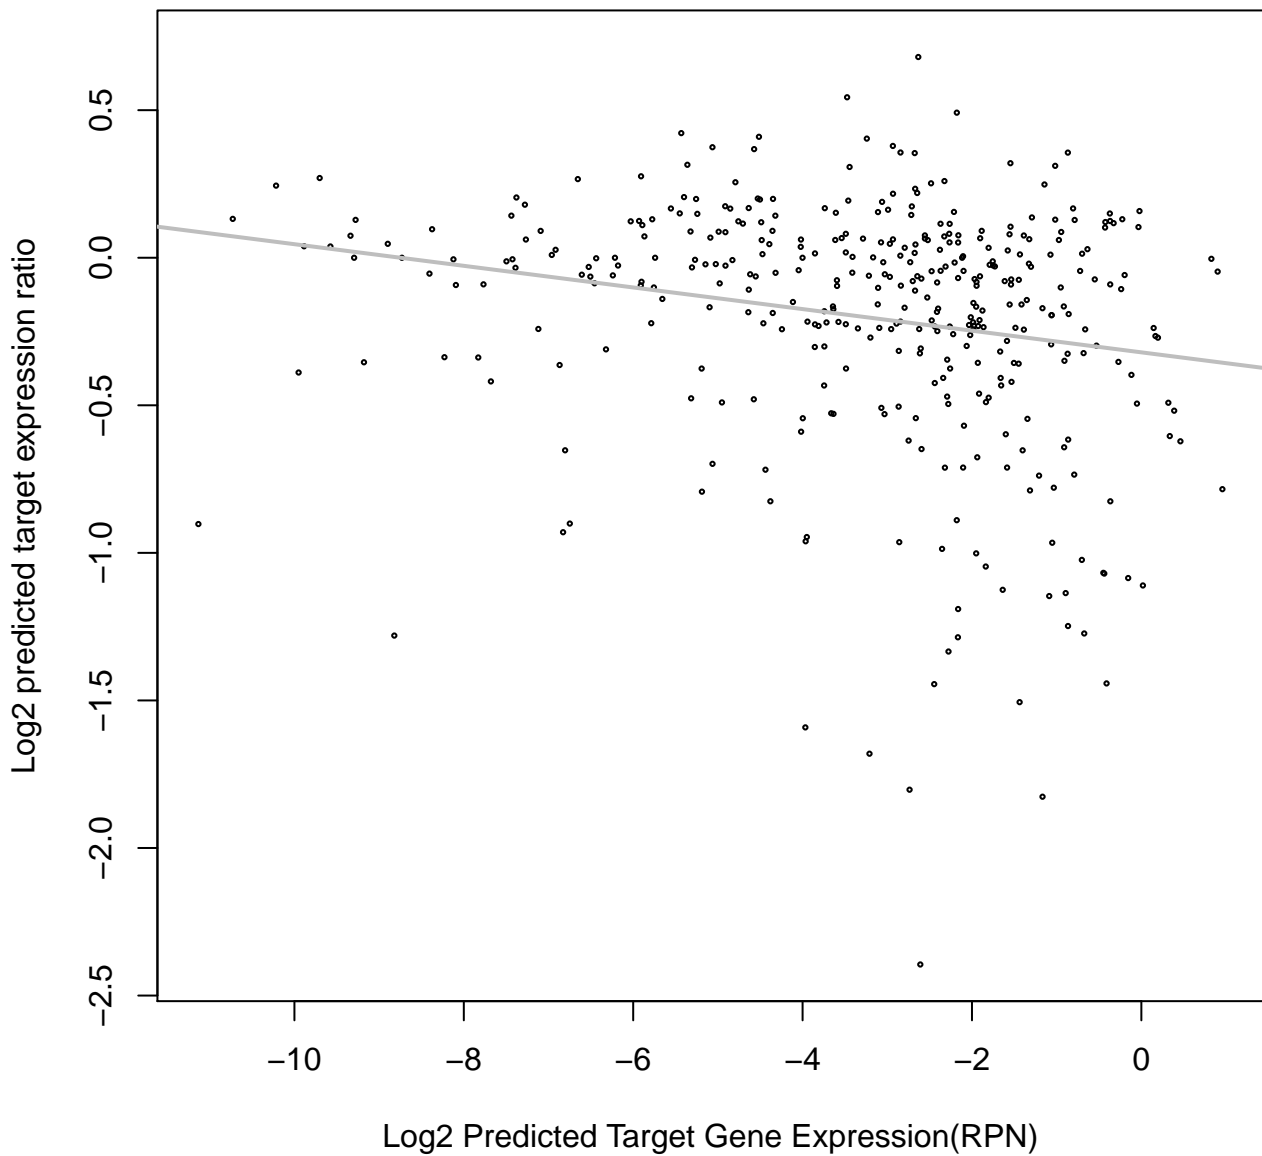

# anderson.sirna-111 - CHIMERA\_M2

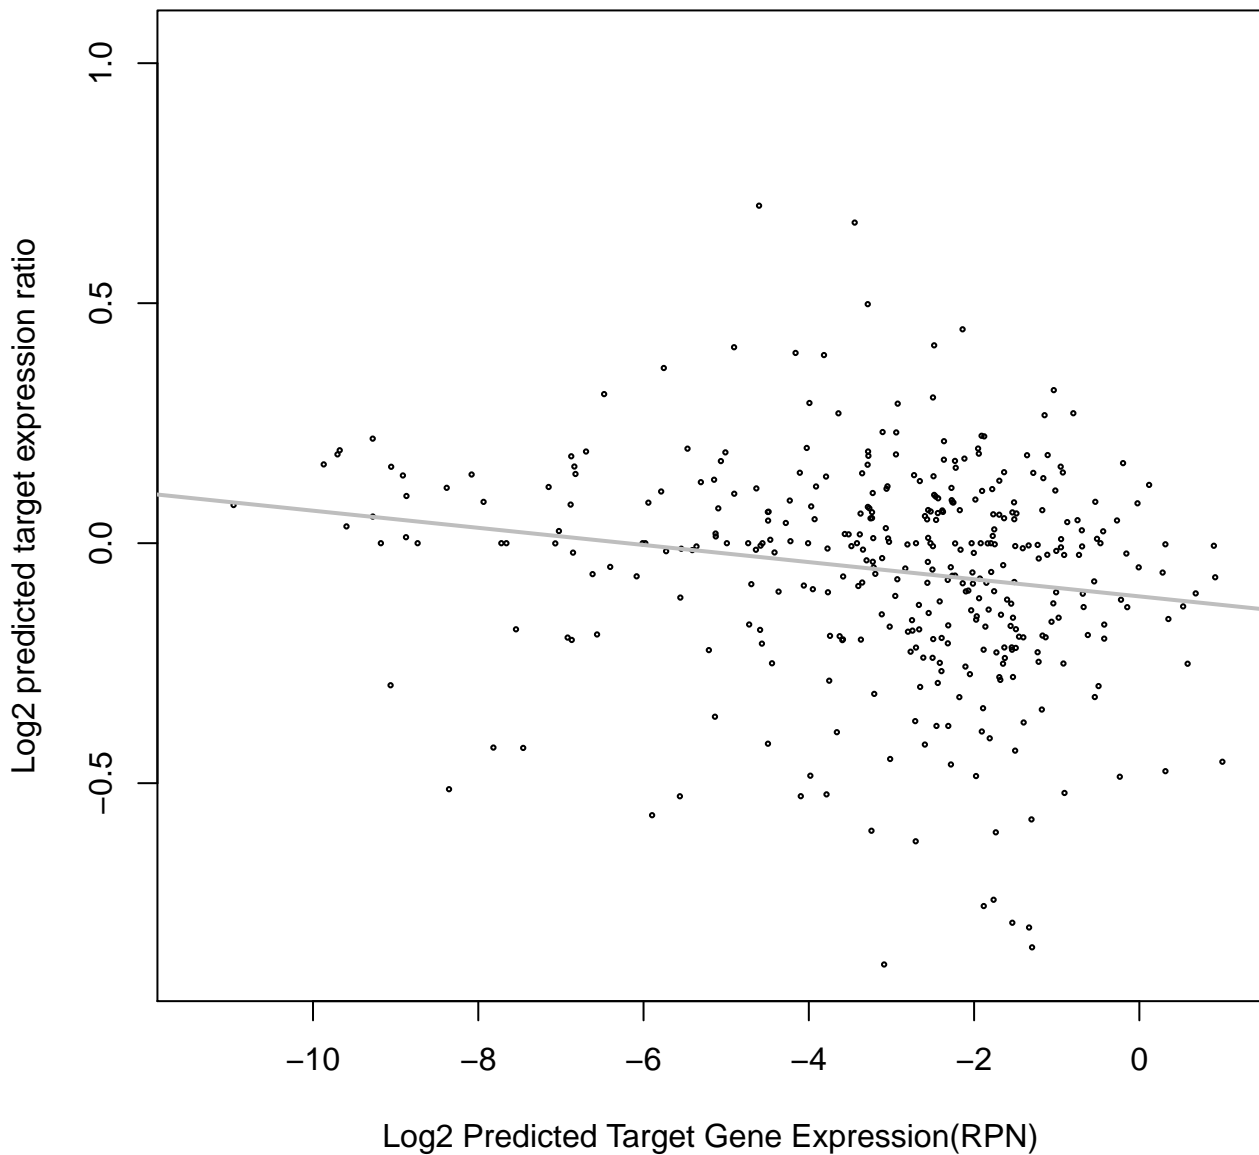

# anderson.sirna-112 - CHIMERA\_M3

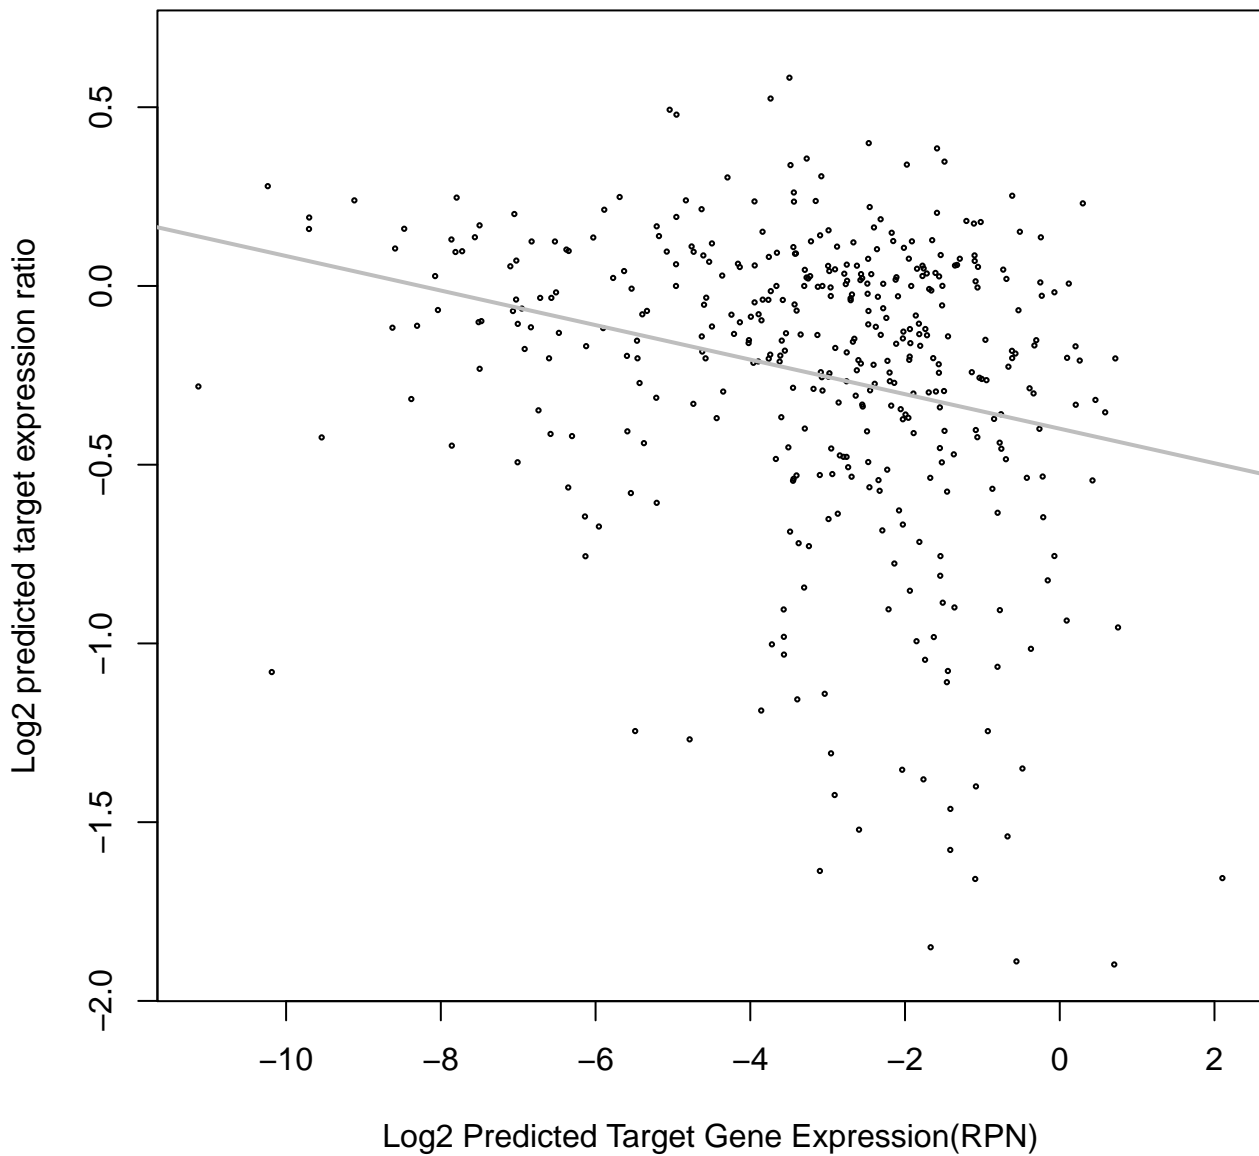

# anderson.sirna-113 - CHIMERA\_M4

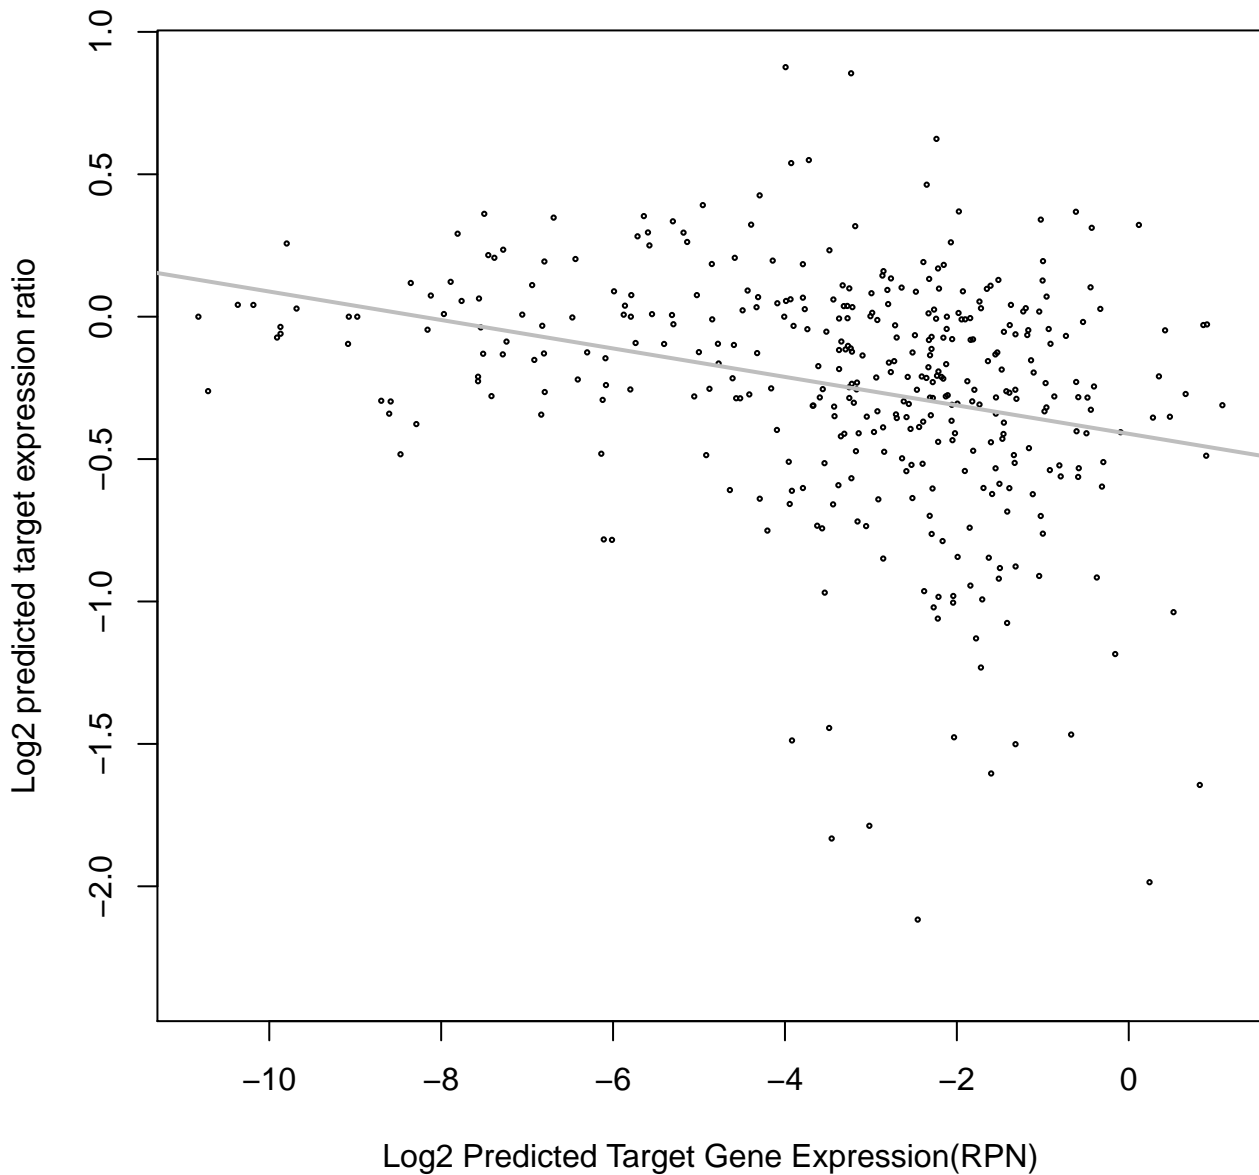

# anderson.sirna-114 - CHIMERA\_M5

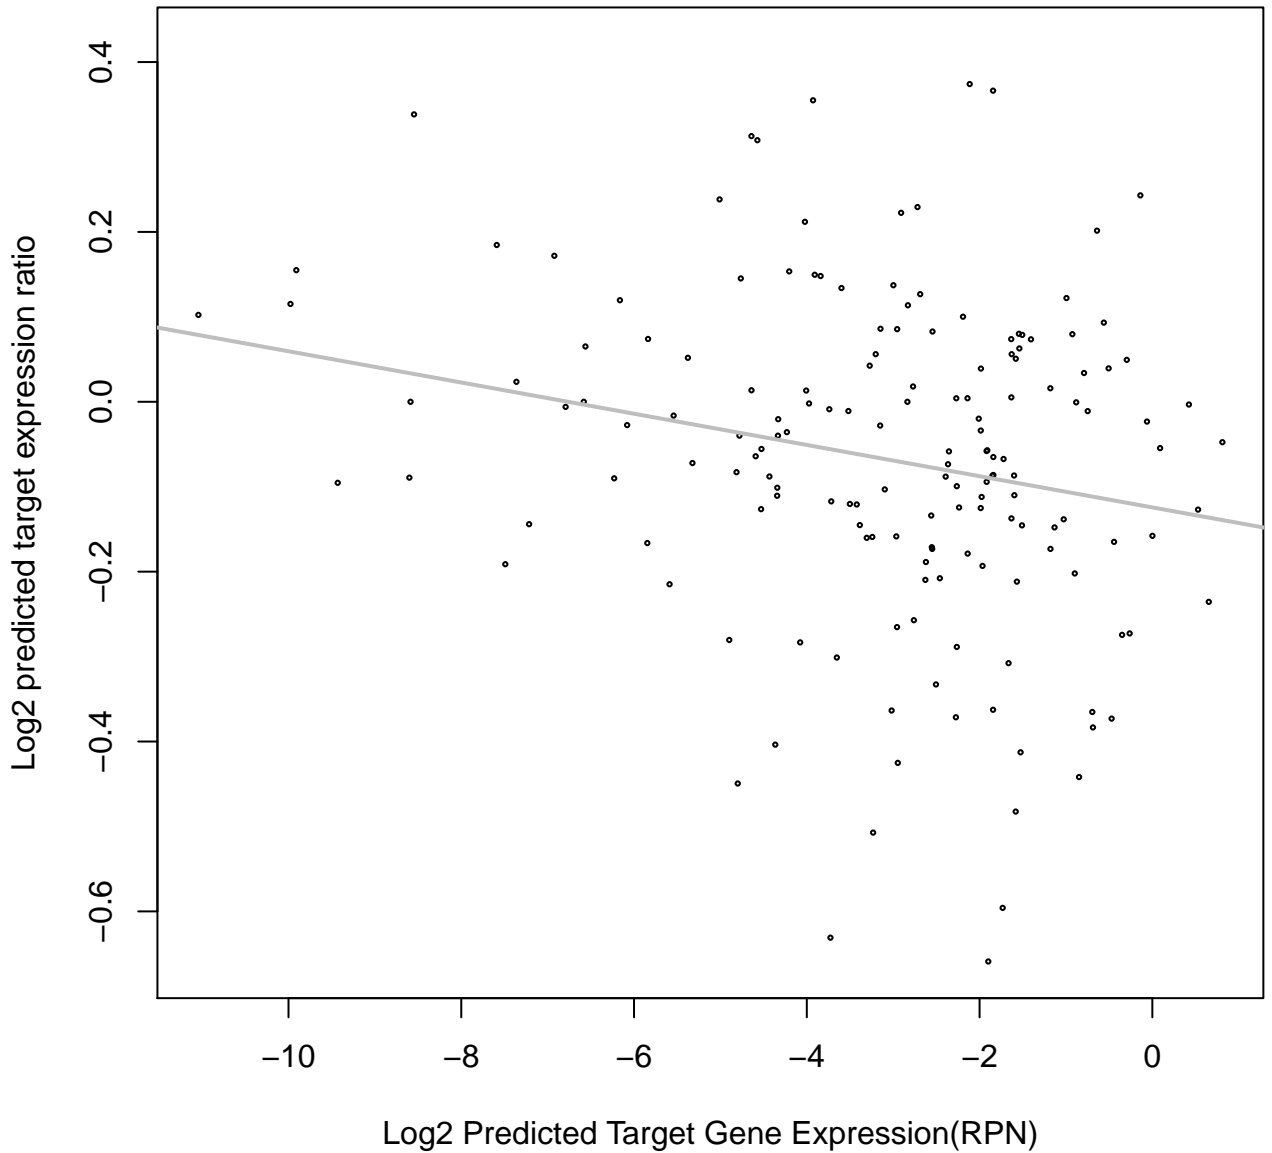

# anderson.sirna-115 - GAPDH\_H12

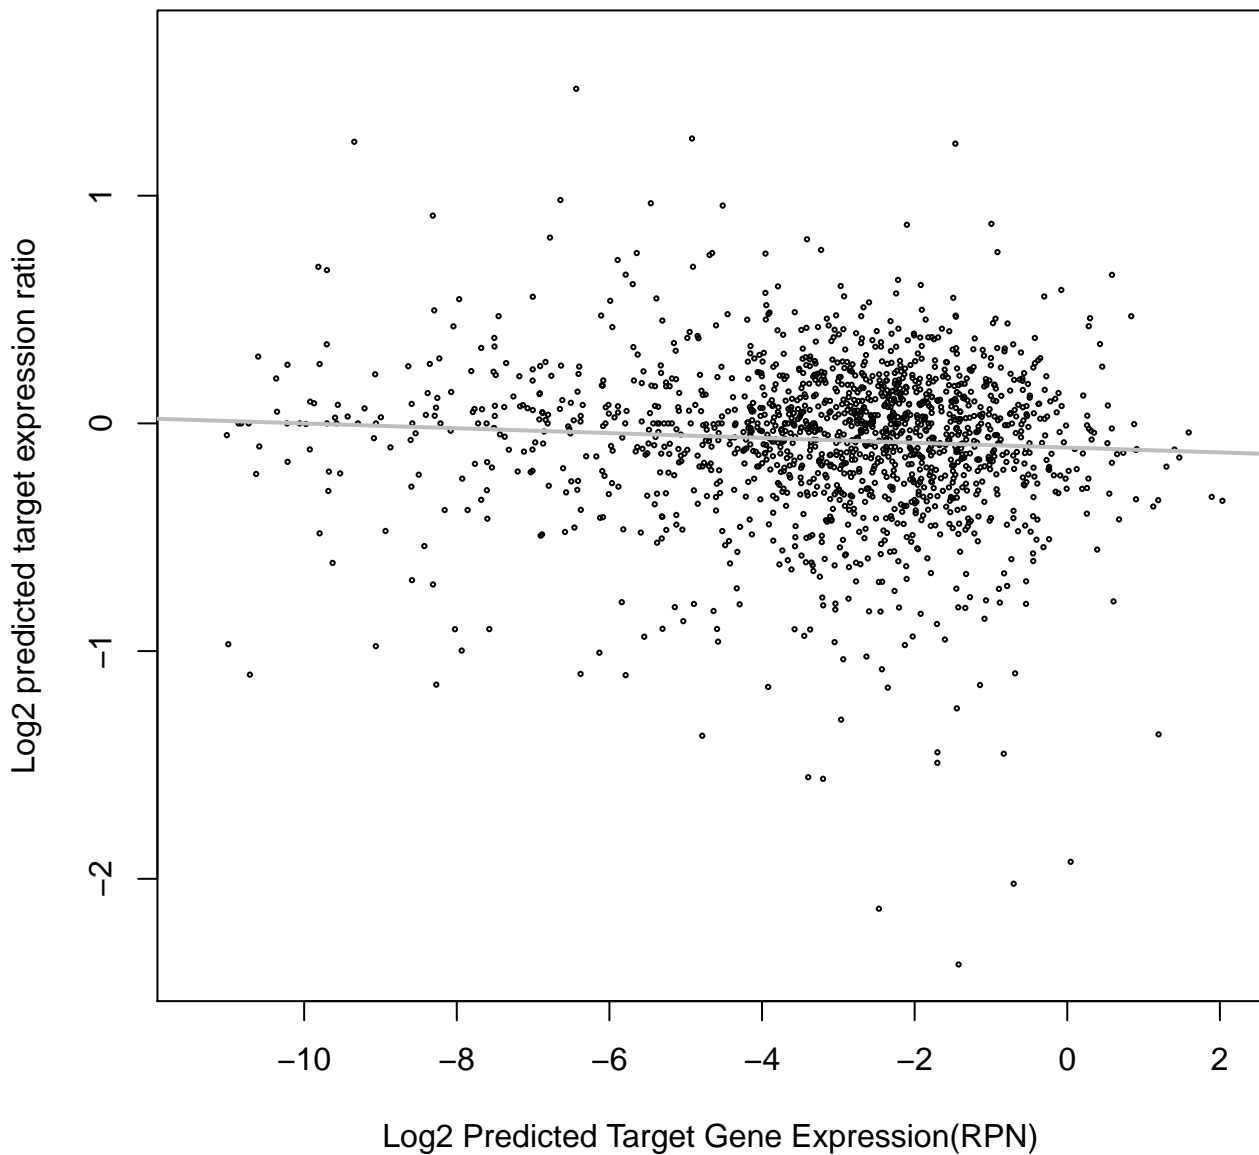



# anderson.sirna-116 - GAPDH\_H14

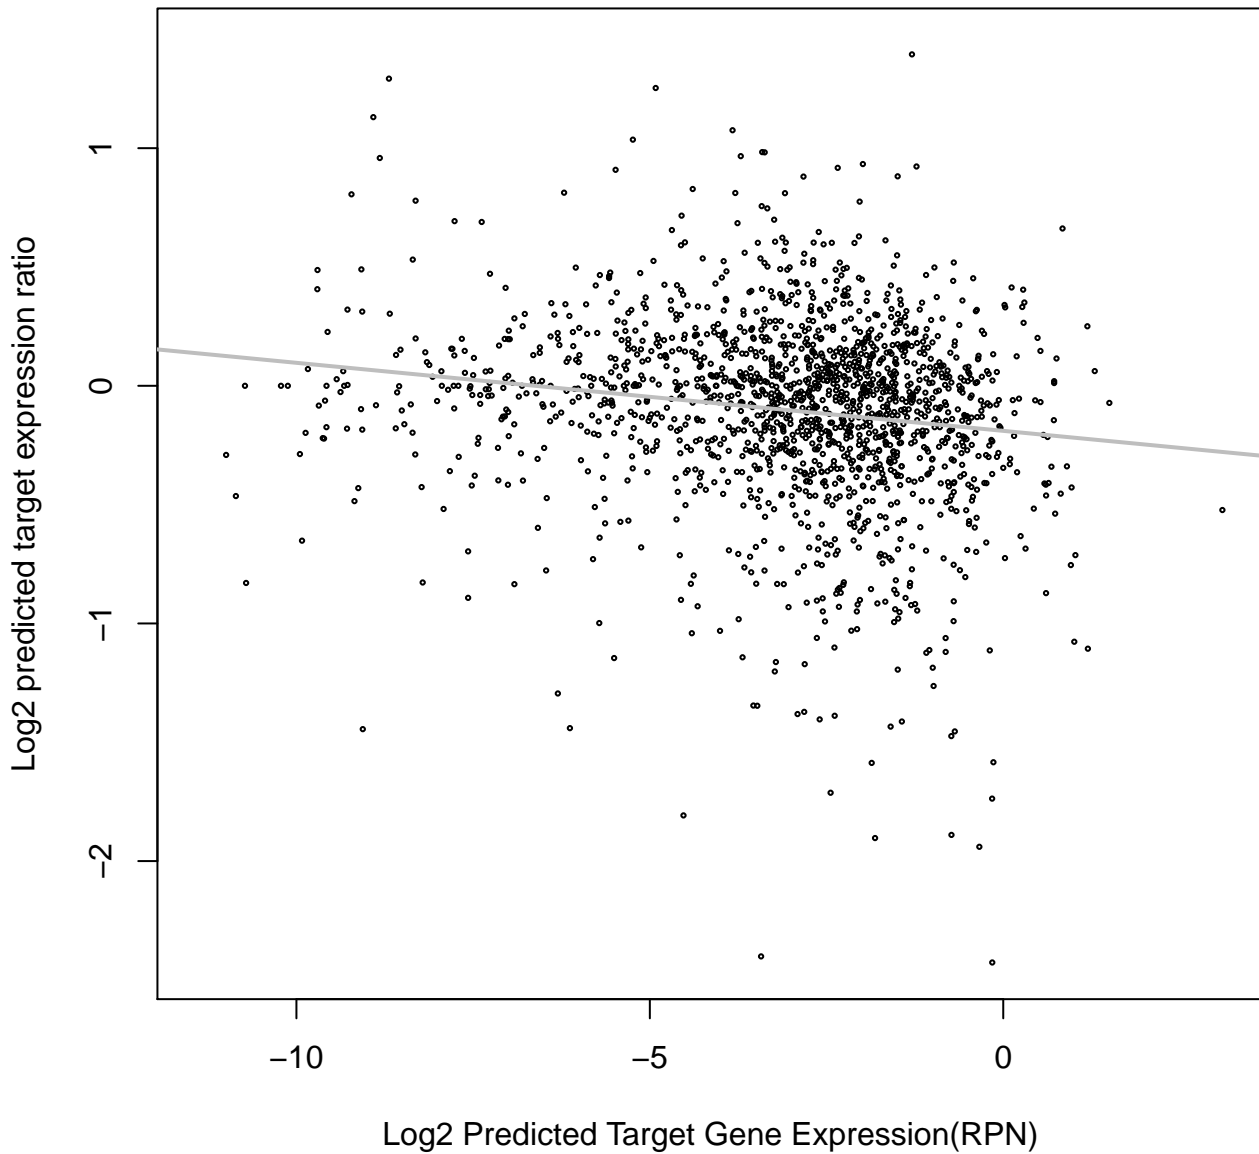

# anderson.sirna-117 - GAPDH\_H15

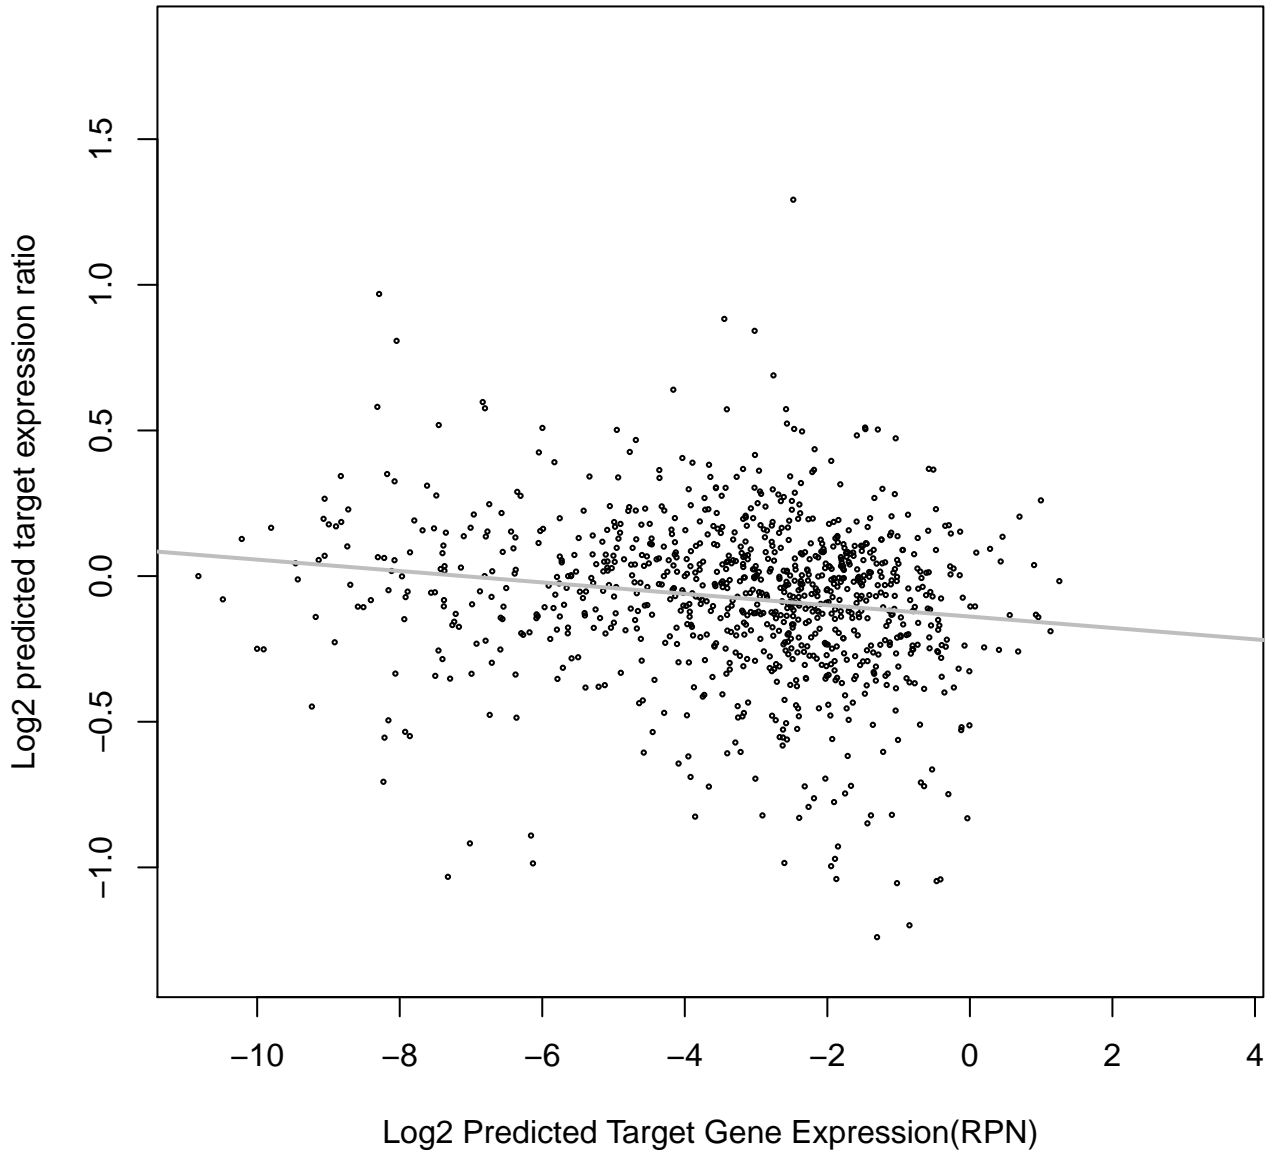

# anderson.sirna-118 - GAPDH\_H17

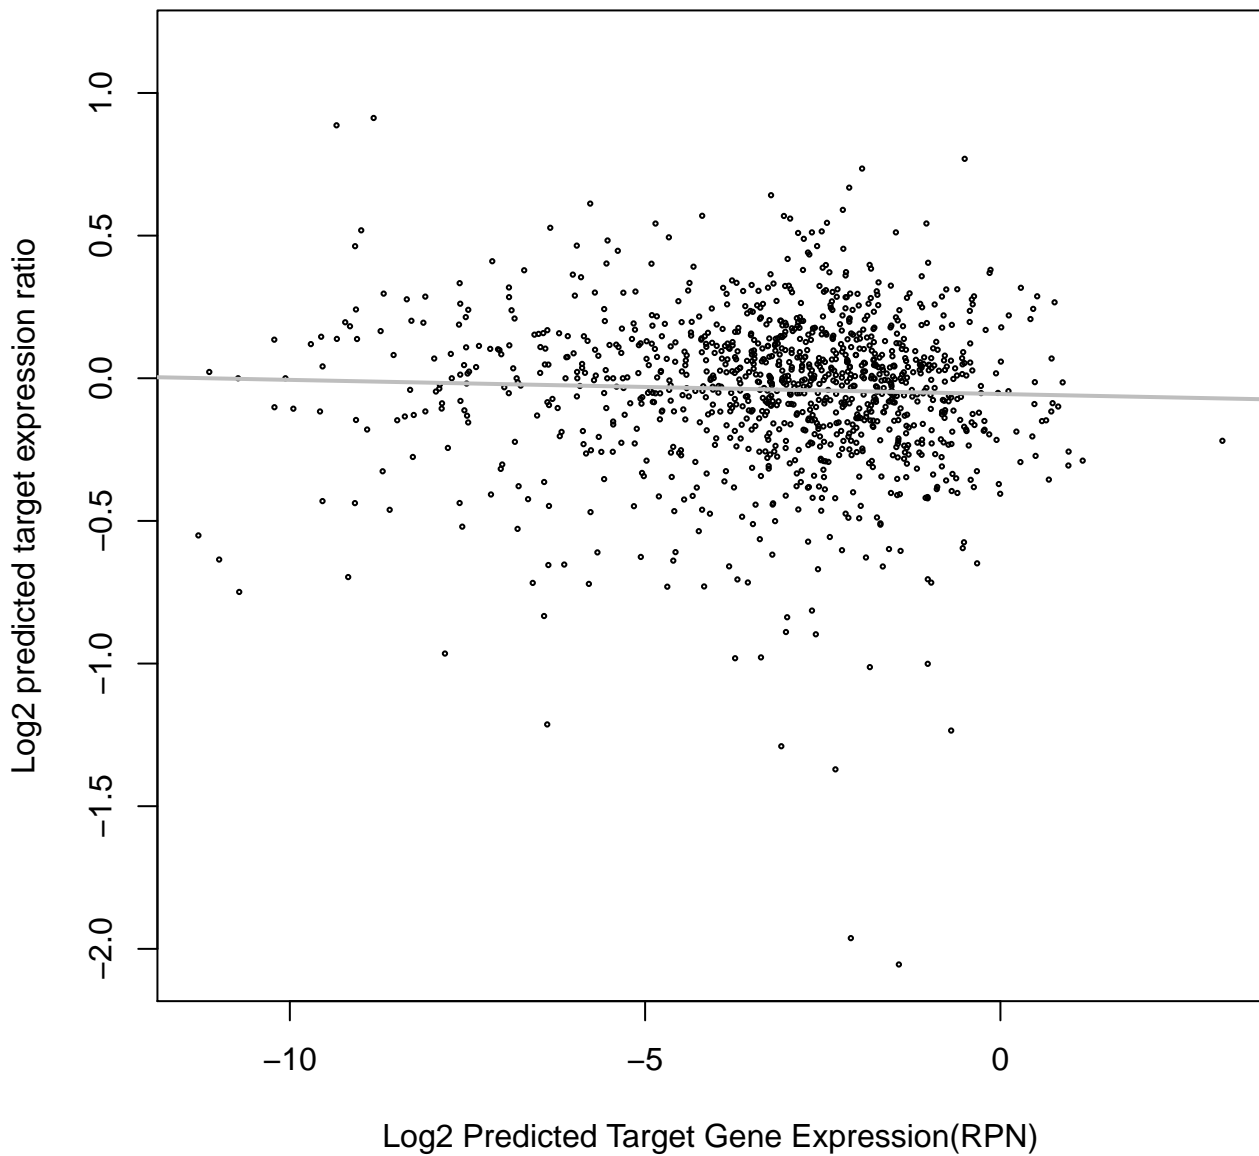

# anderson.sirna-119 - GAPDH\_H18

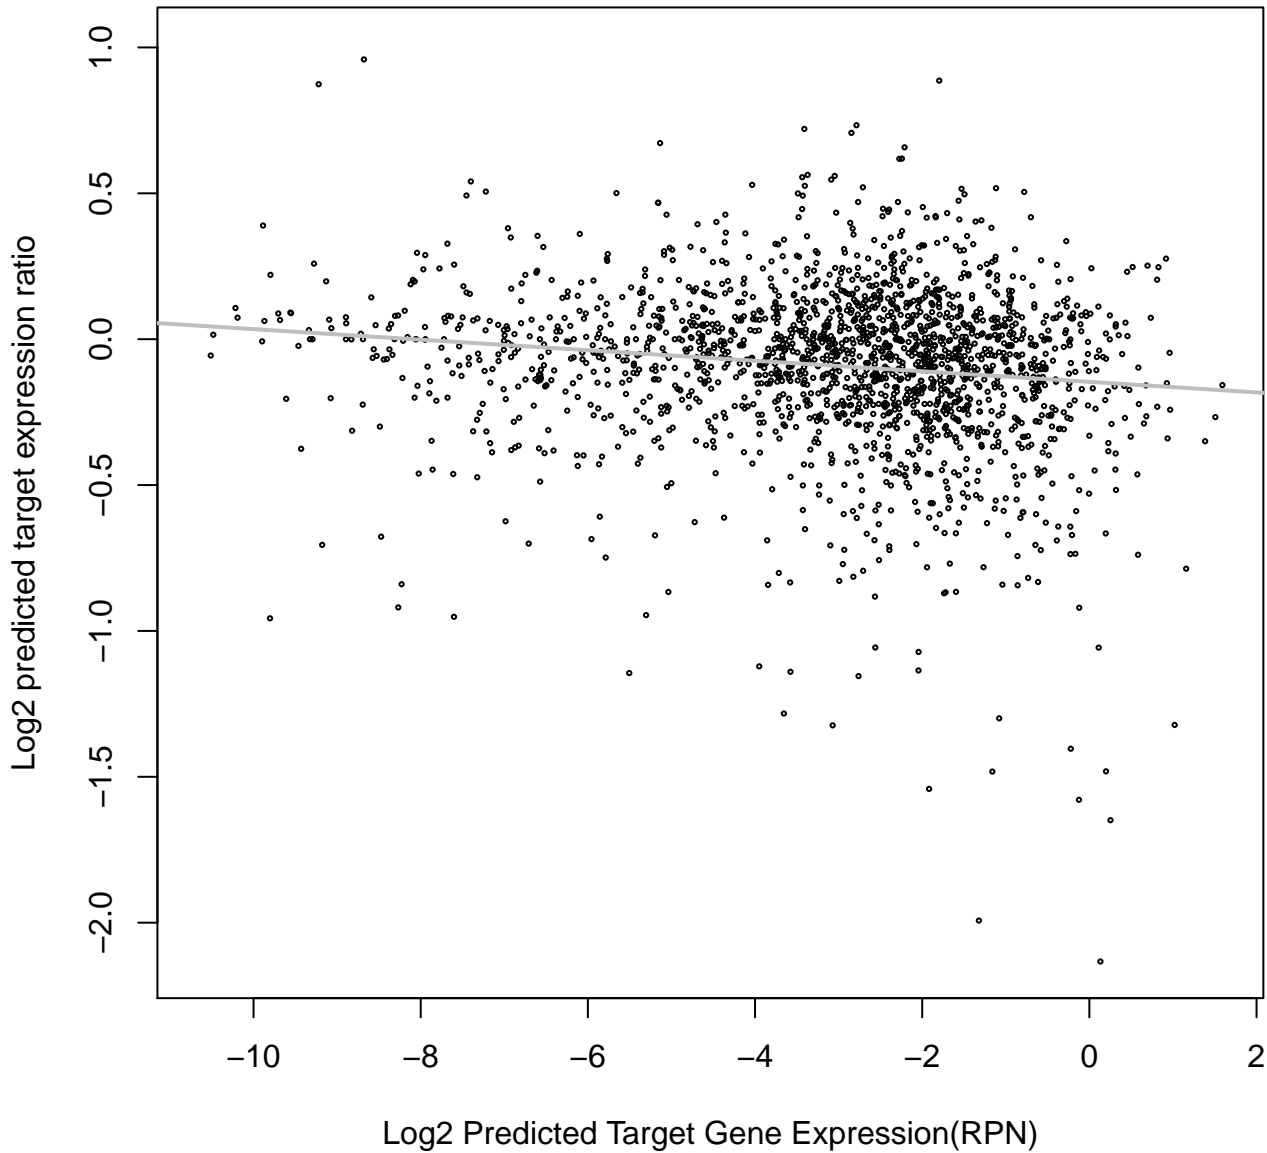

# anderson.sirna-120 - GAPDH\_L10

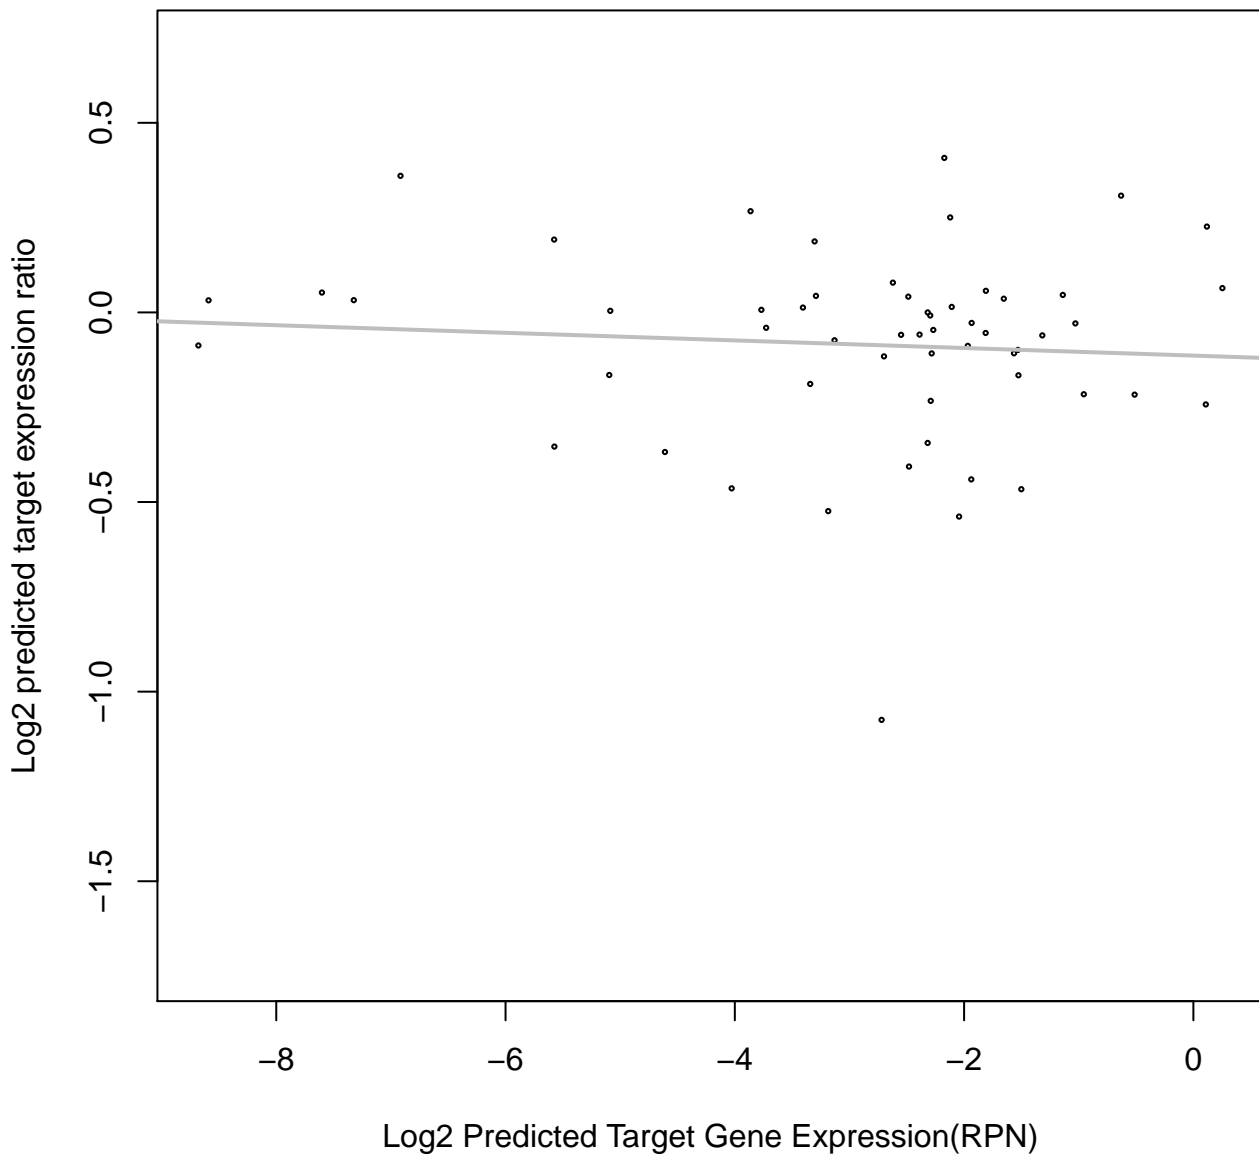

# anderson.sirna-121 - GAPDH\_L16B

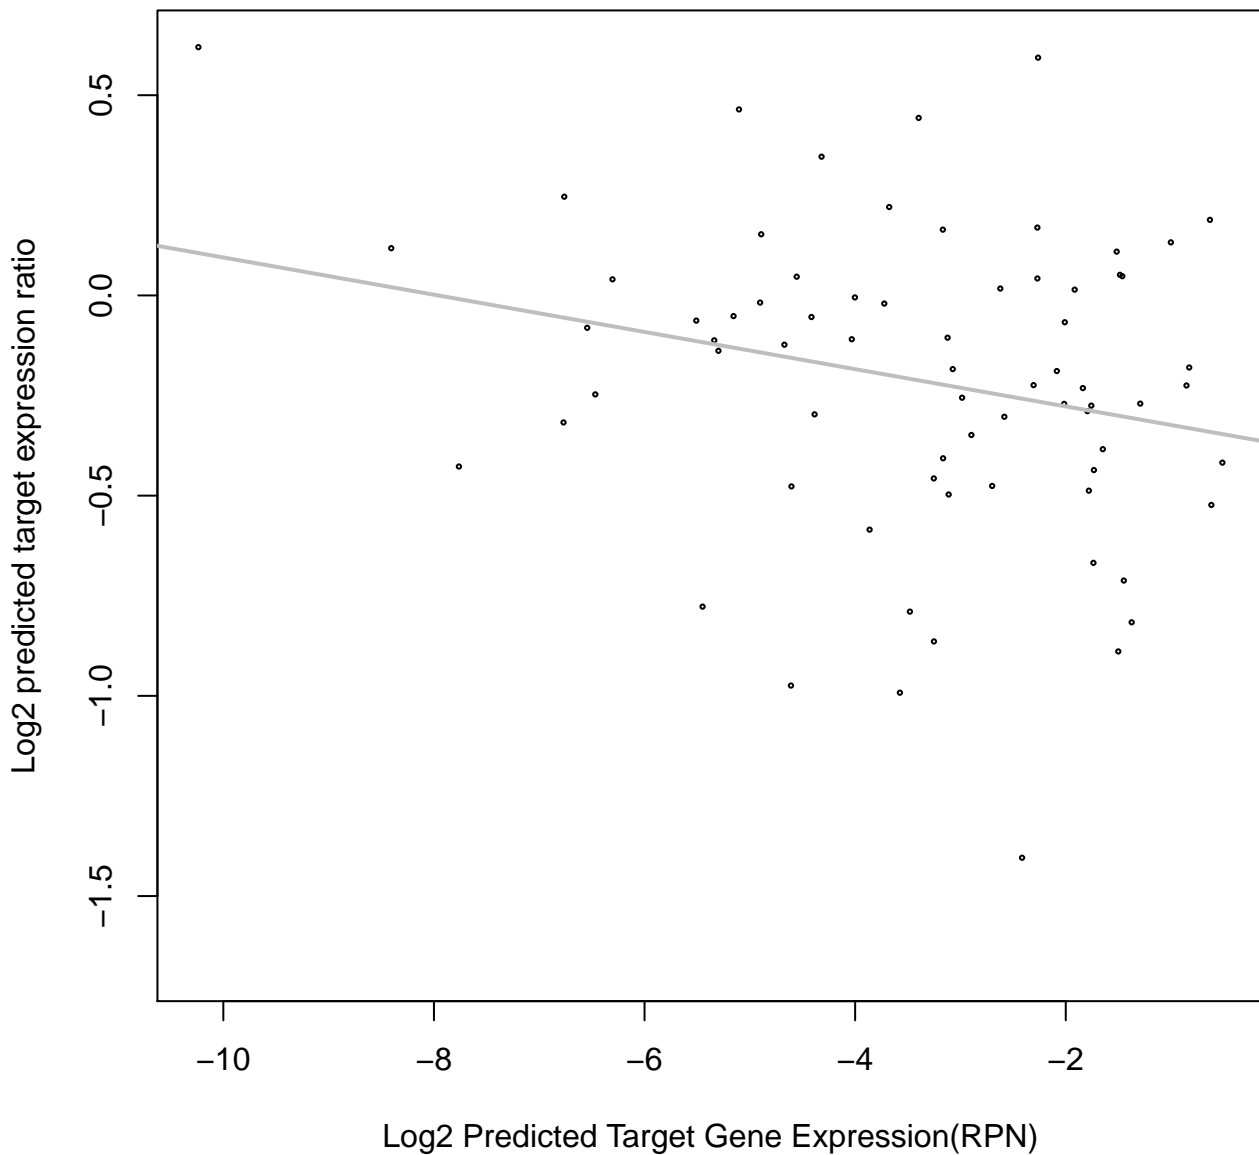

# anderson.sirna-122 - GAPDH\_L1

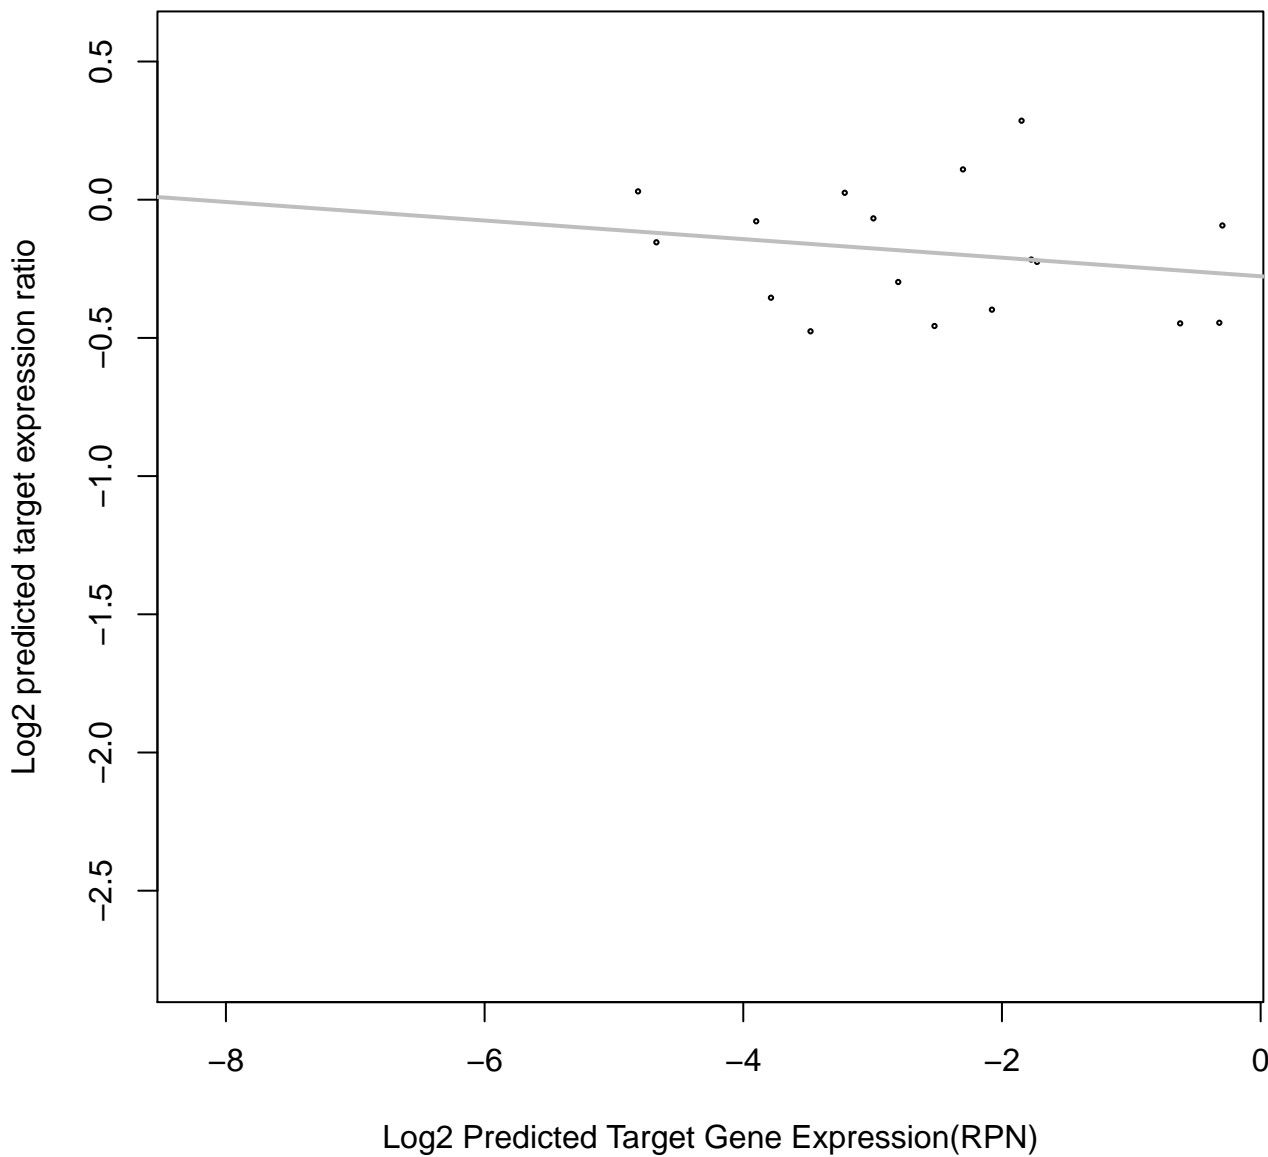

# anderson.sirna-123 - GAPDH\_L4

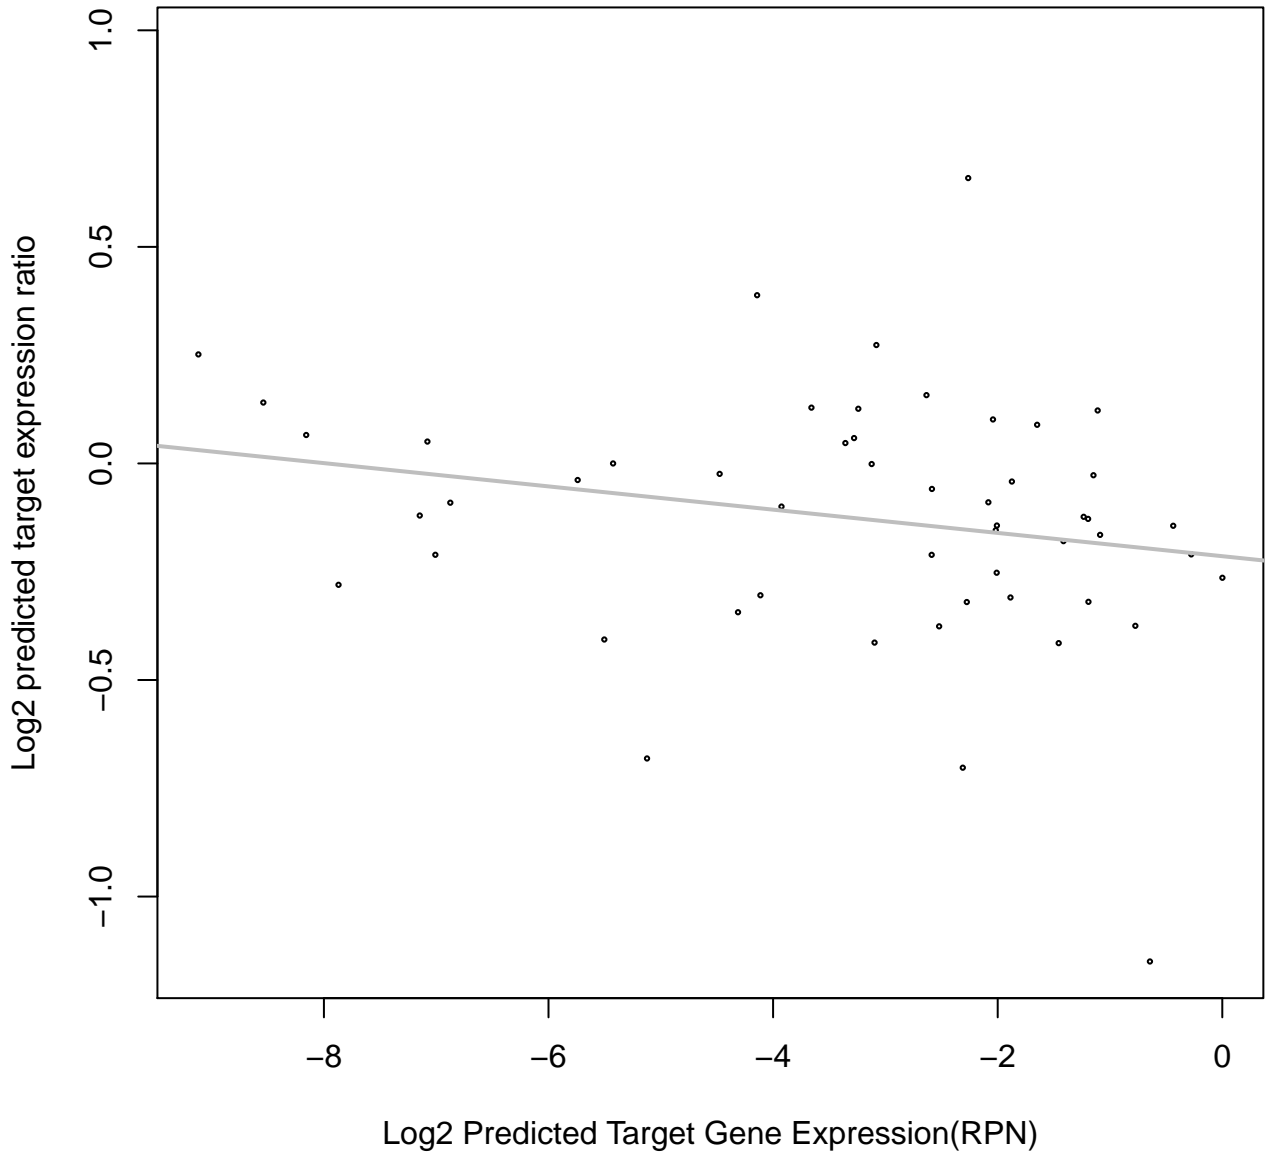



# anderson.sirna-124 - GAPDH\_M17A

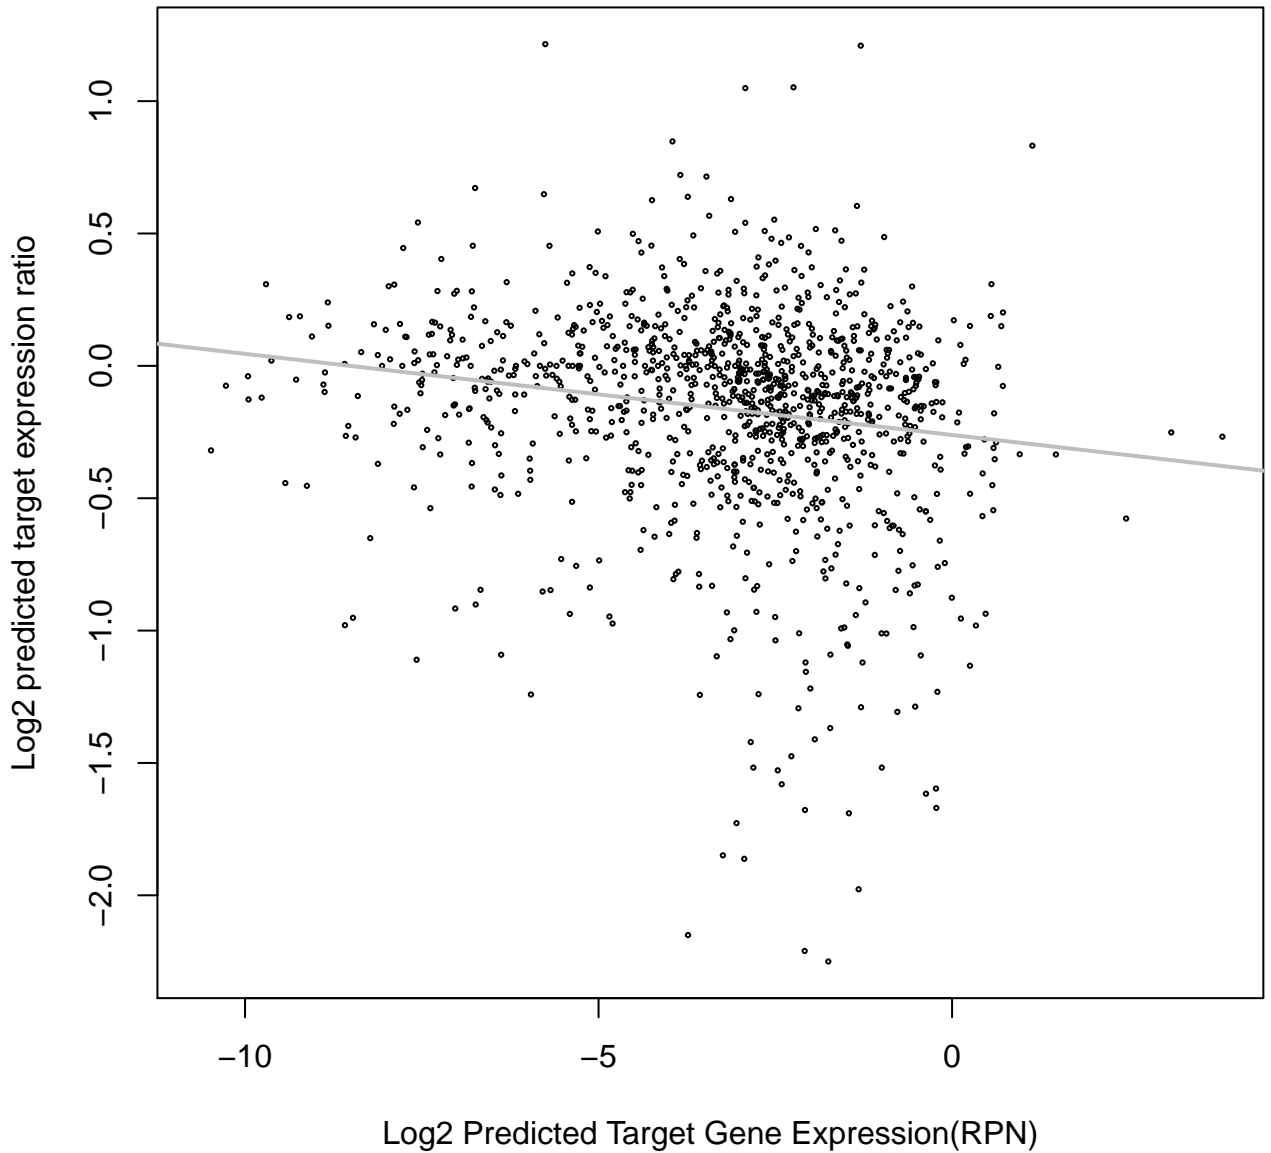

# anderson.sirna-125 - GAPDH\_M1

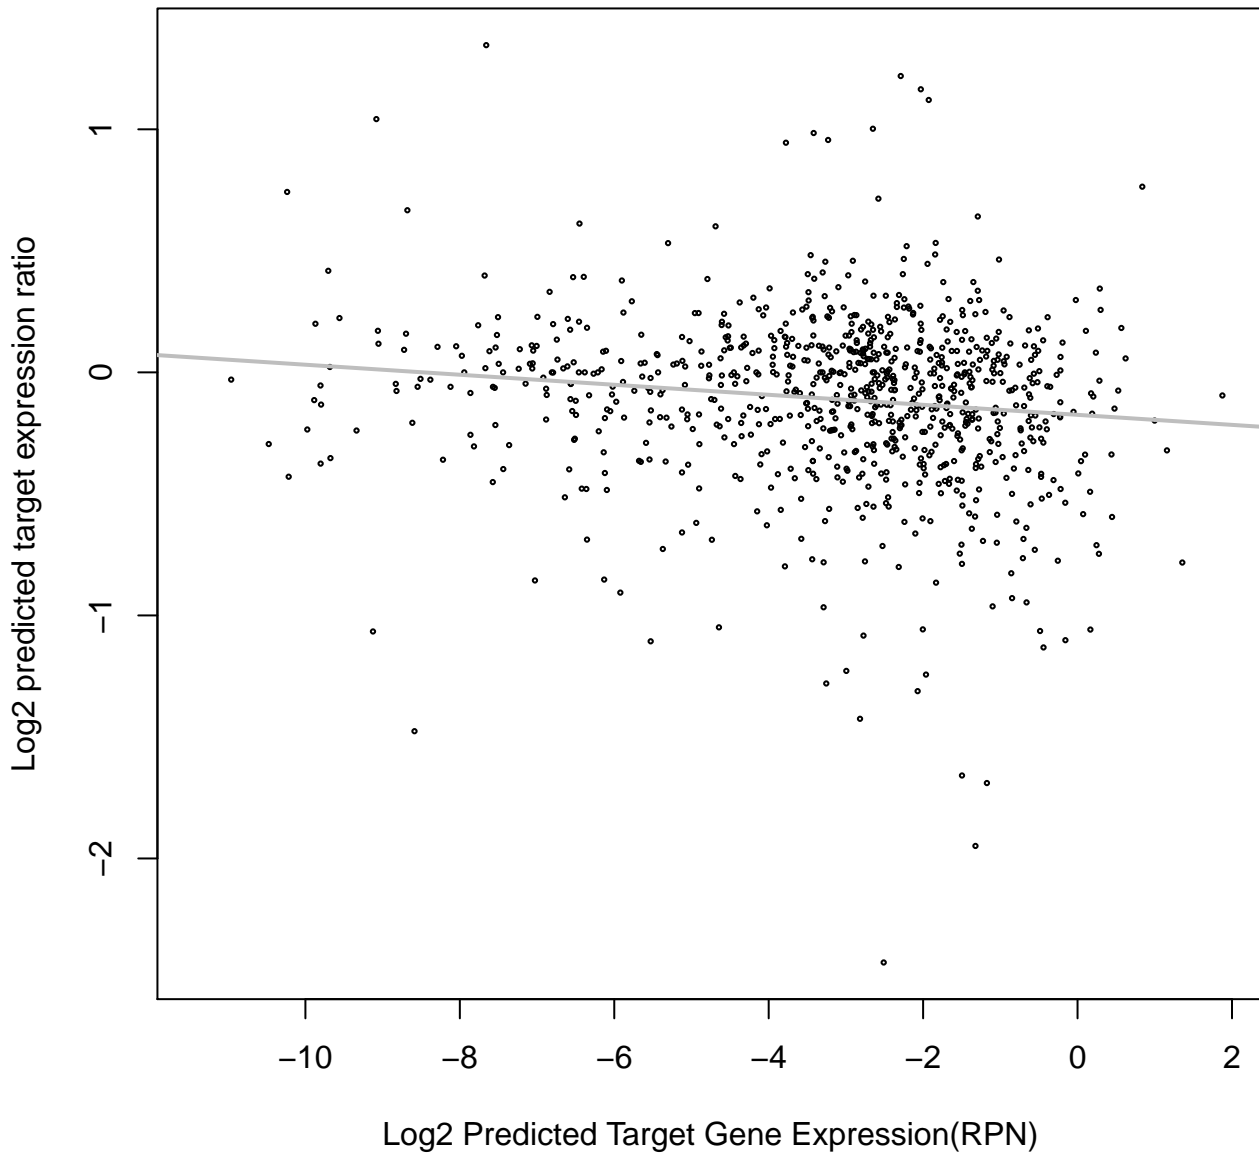

# anderson.sirna-126 - GAPDH\_M4

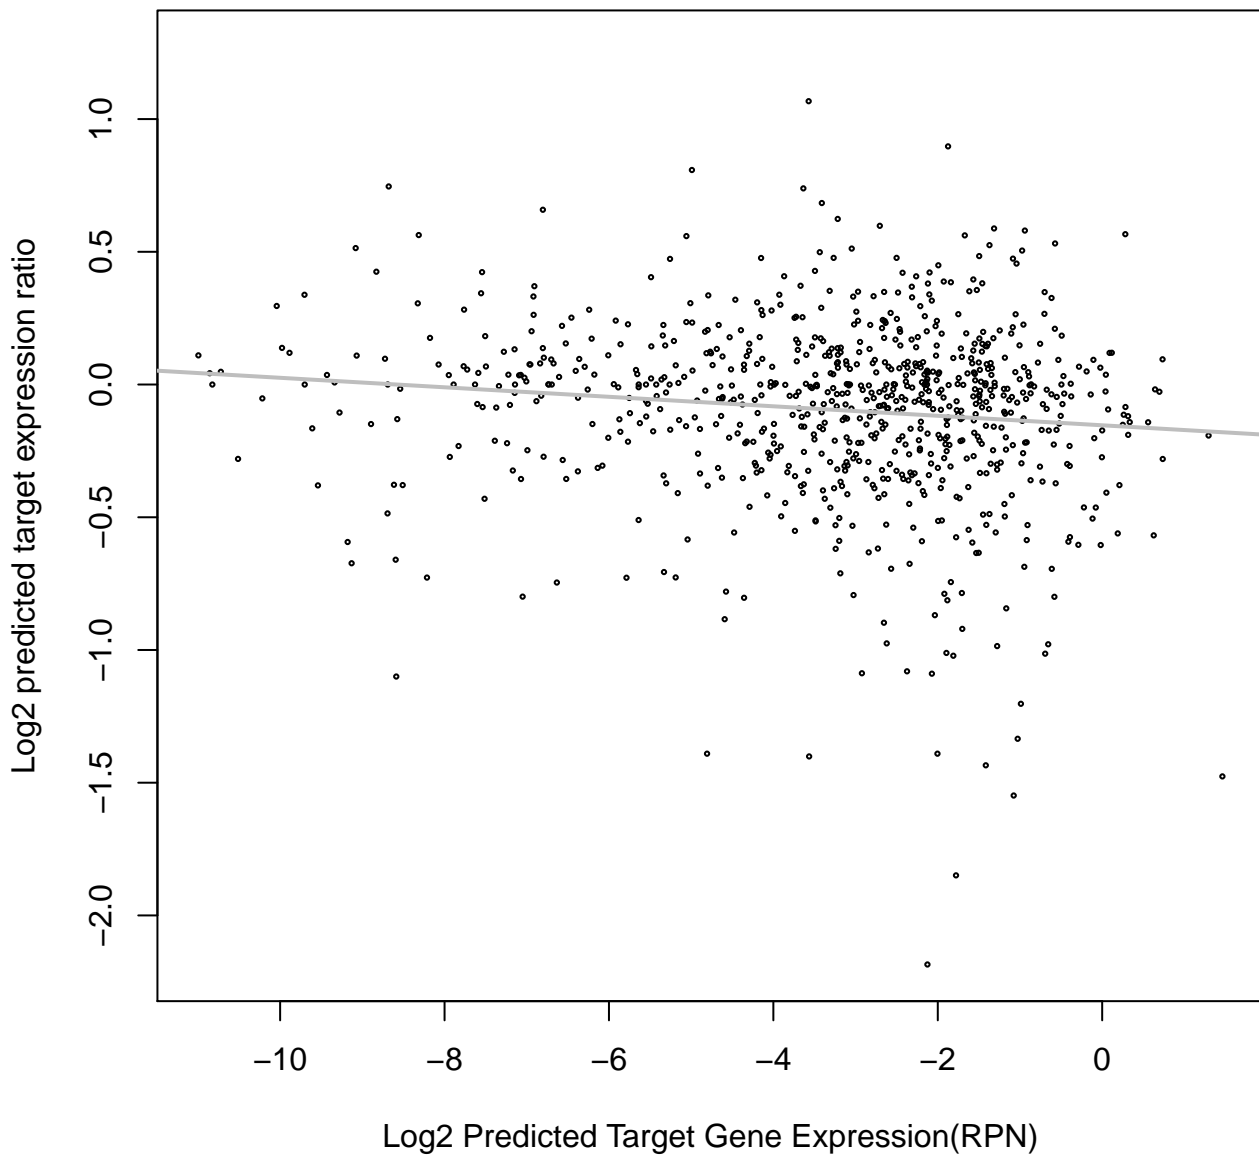

# anderson.sirna-127 - GAPDH\_M6

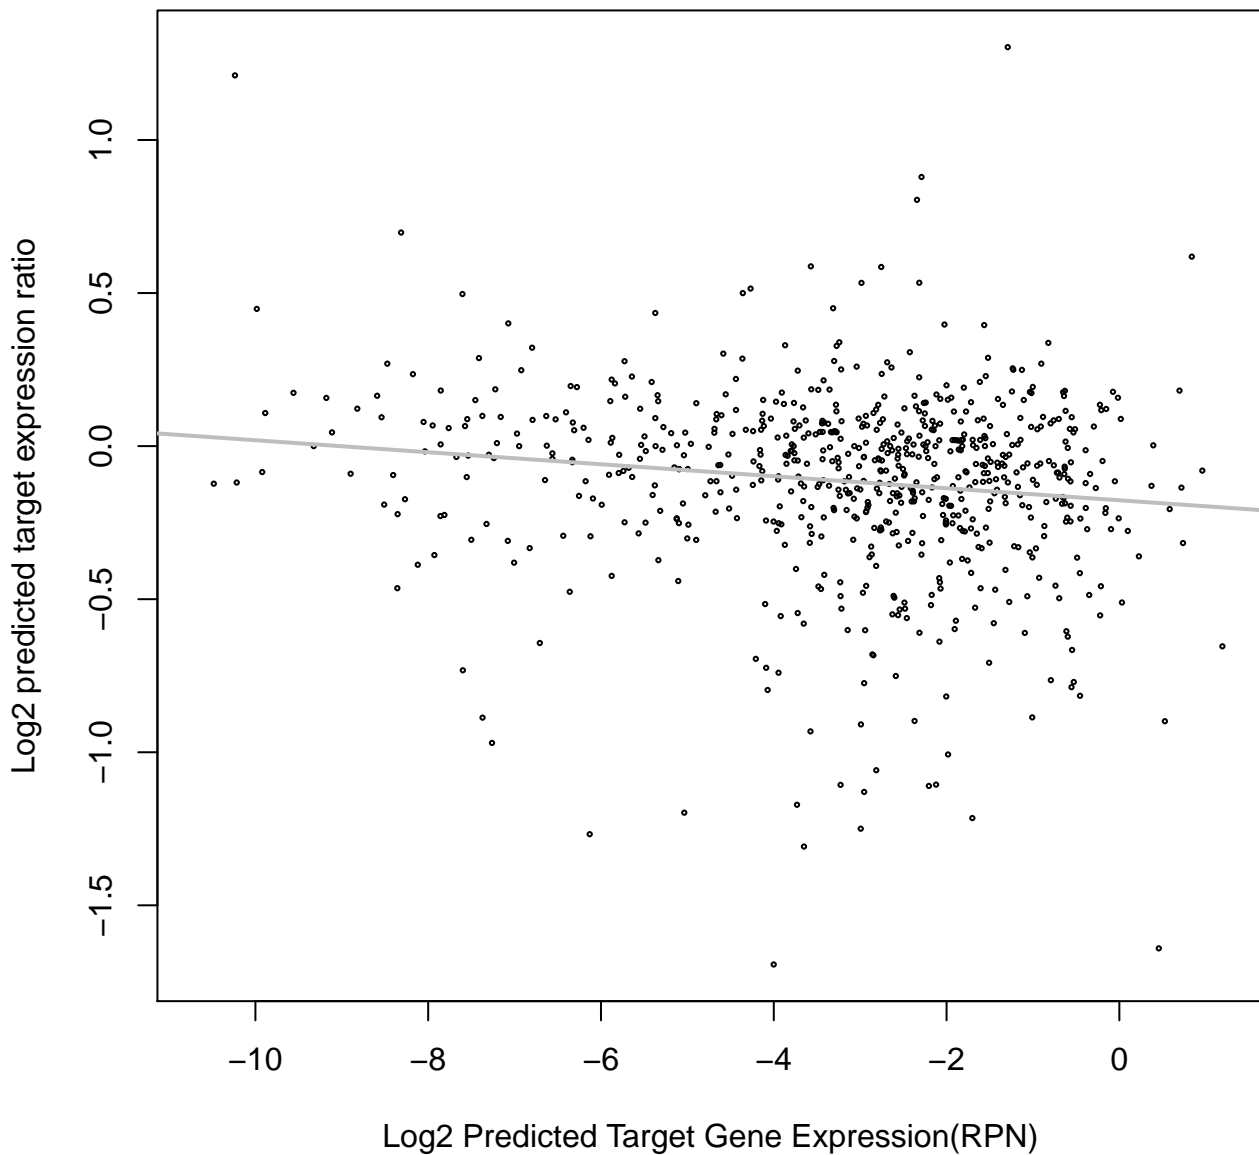

# anderson.sirna-128 - GAPDH\_M8

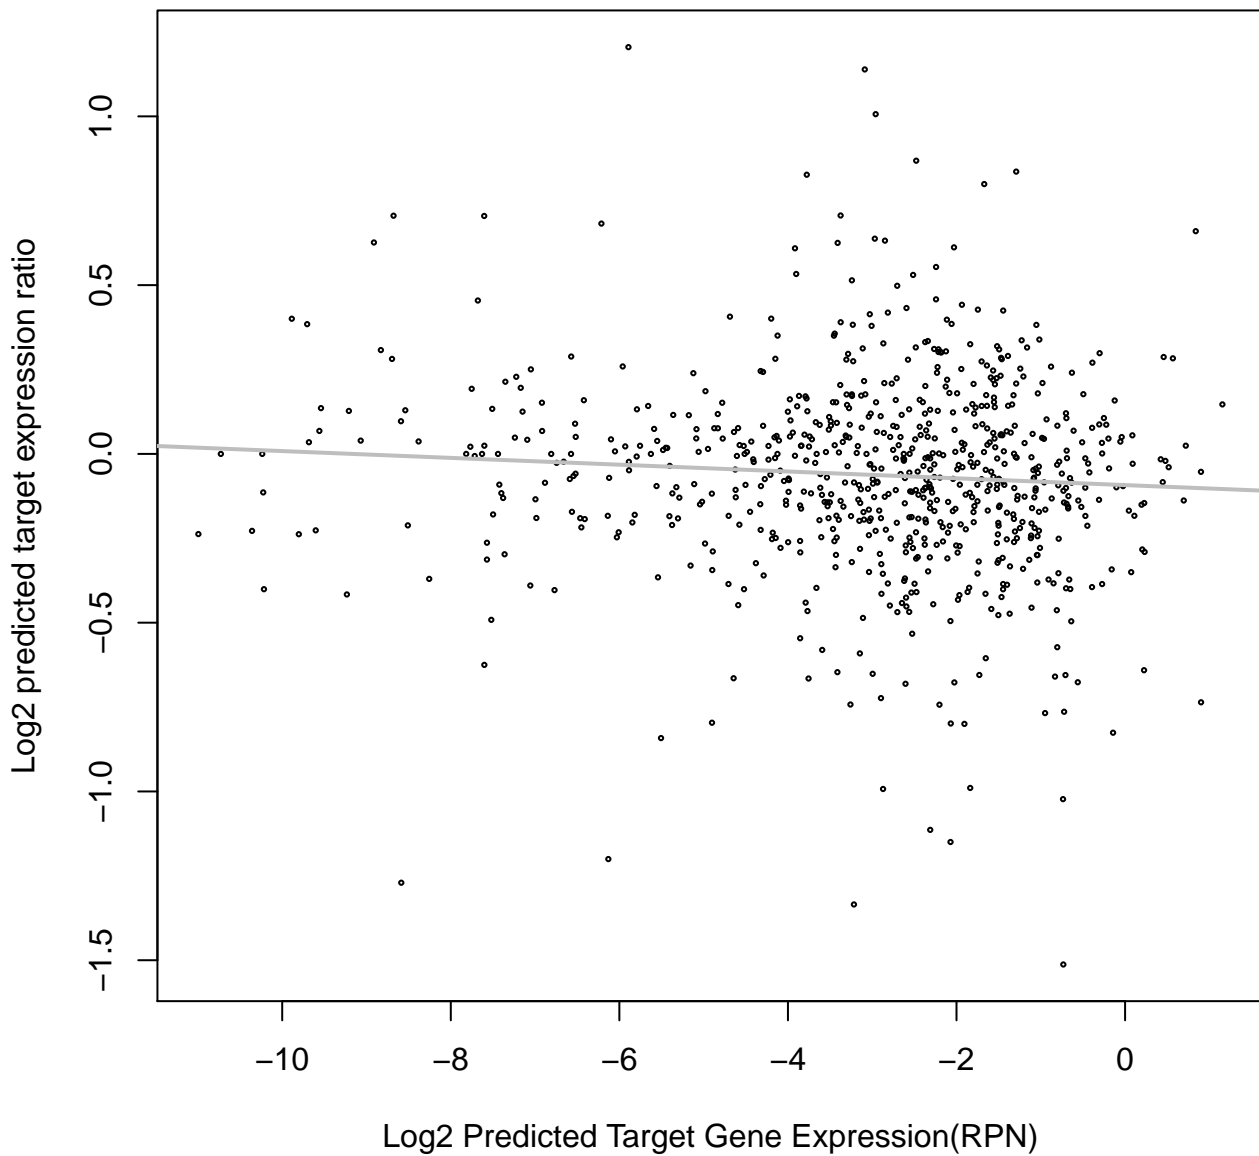

# anderson.sirna-129 - PPIB\_H13

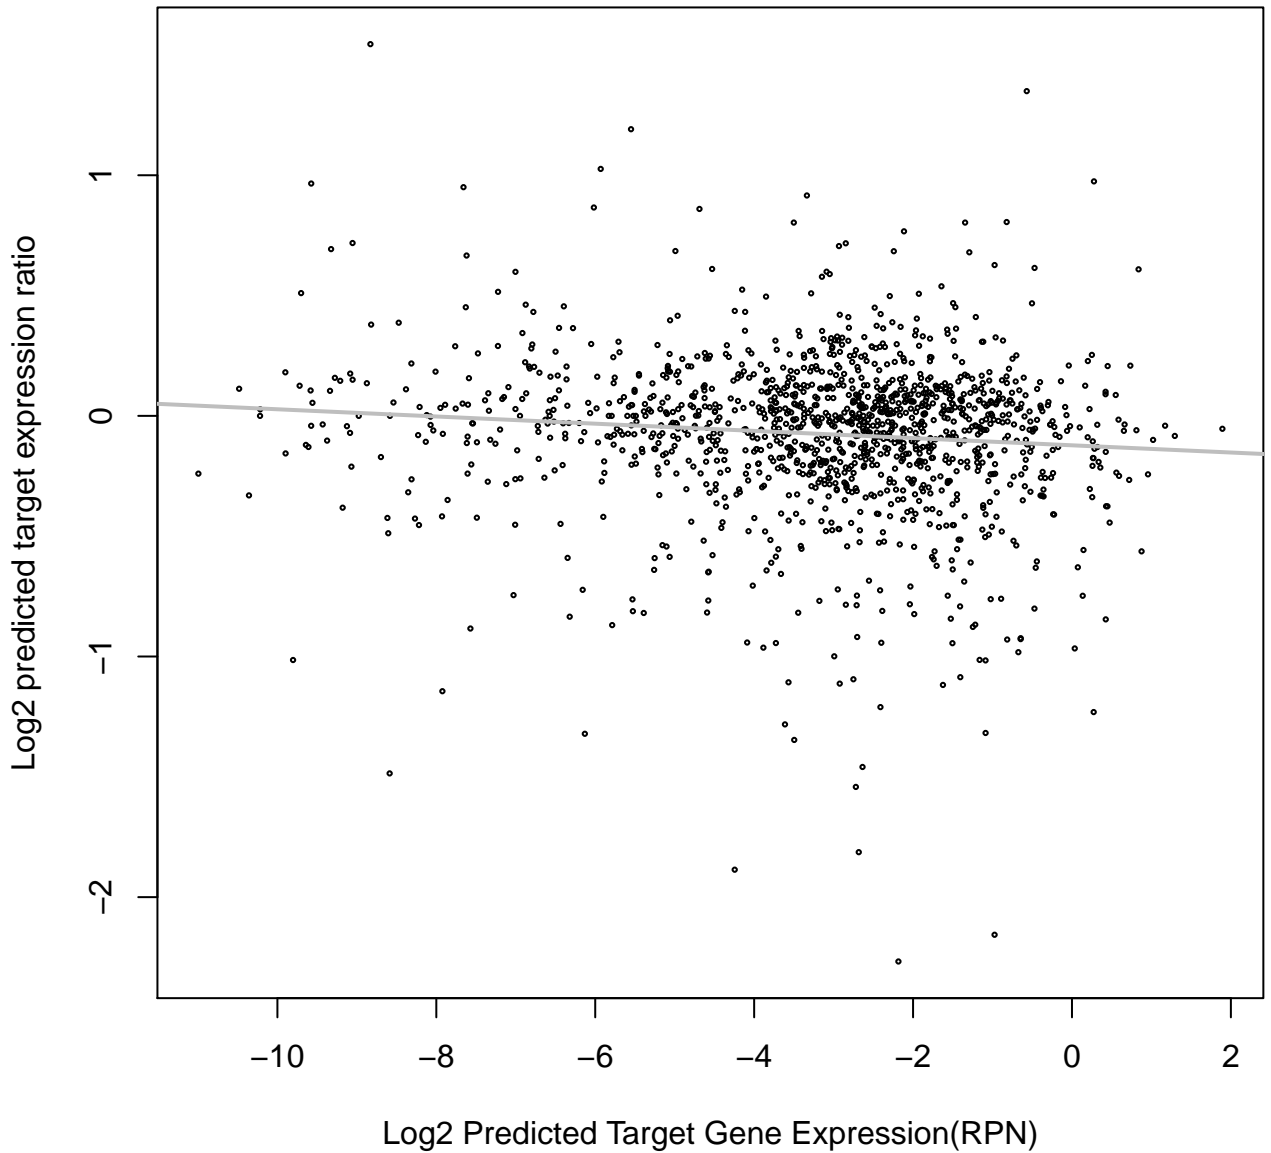

# anderson.sirna-130 - PPIB\_H14

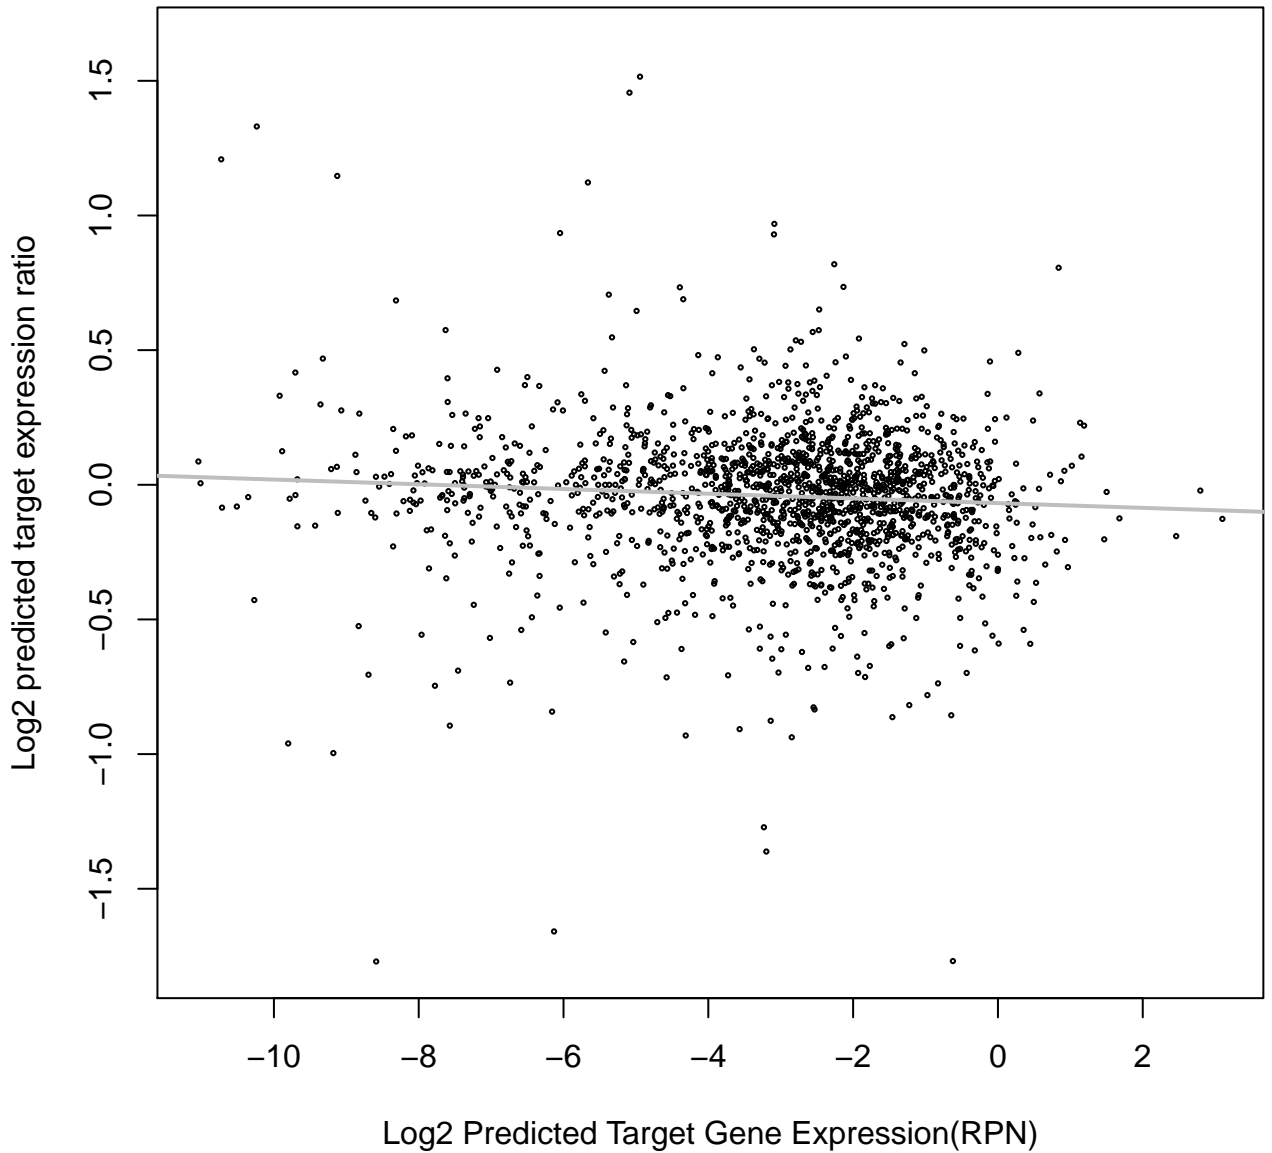

# anderson.sirna-131 - PPIB\_H17

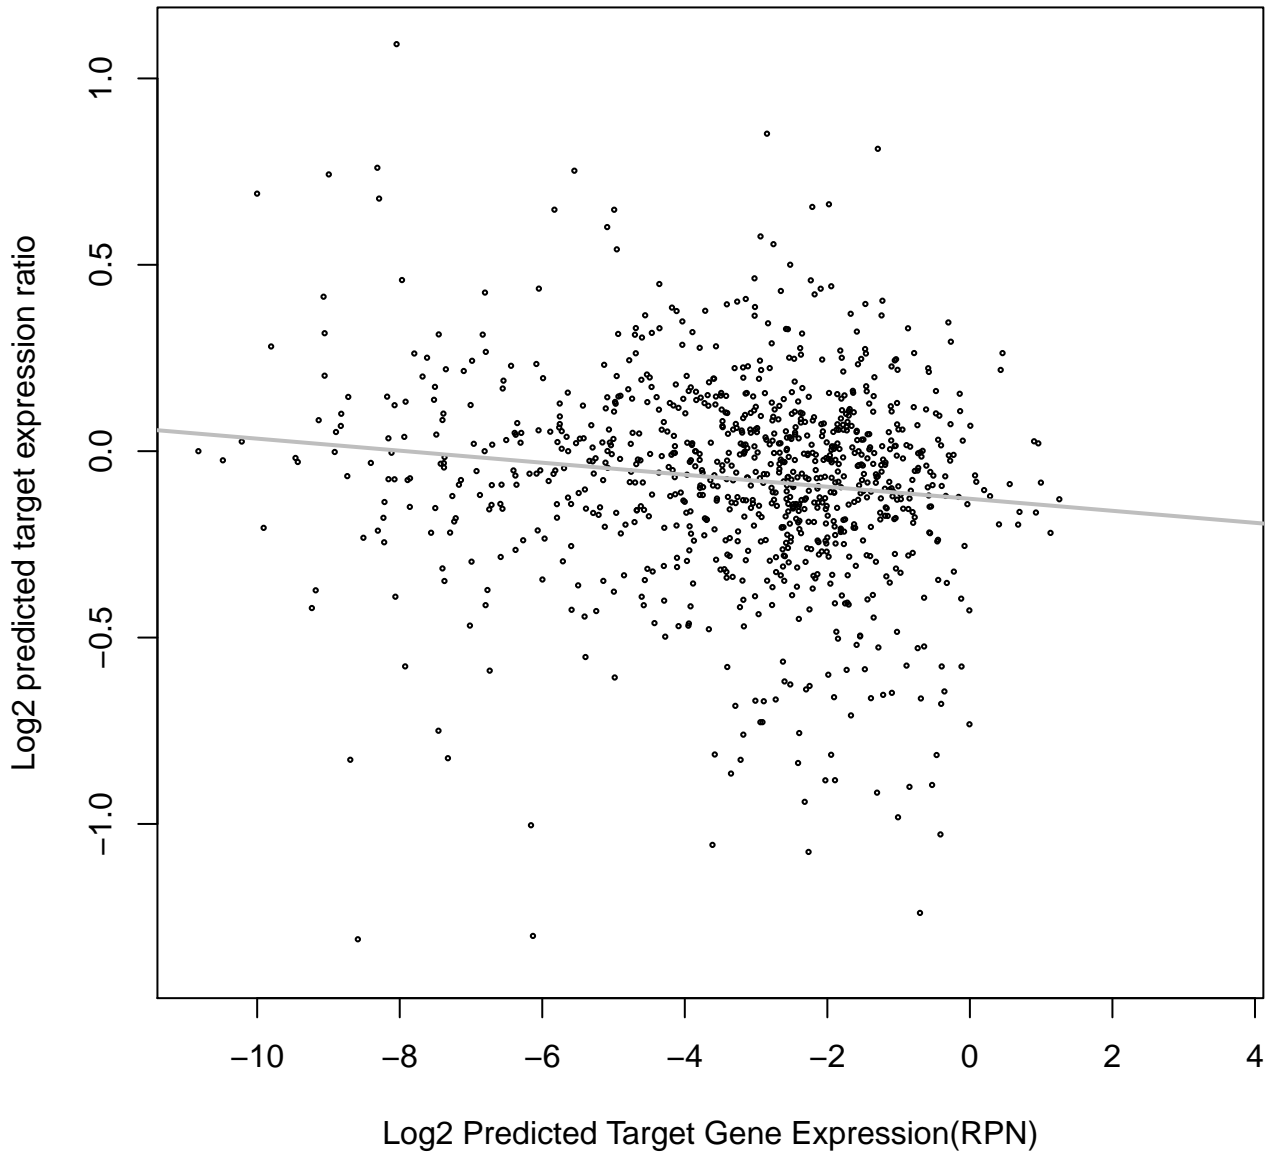



# anderson.sirna-132 - PPIB\_H5

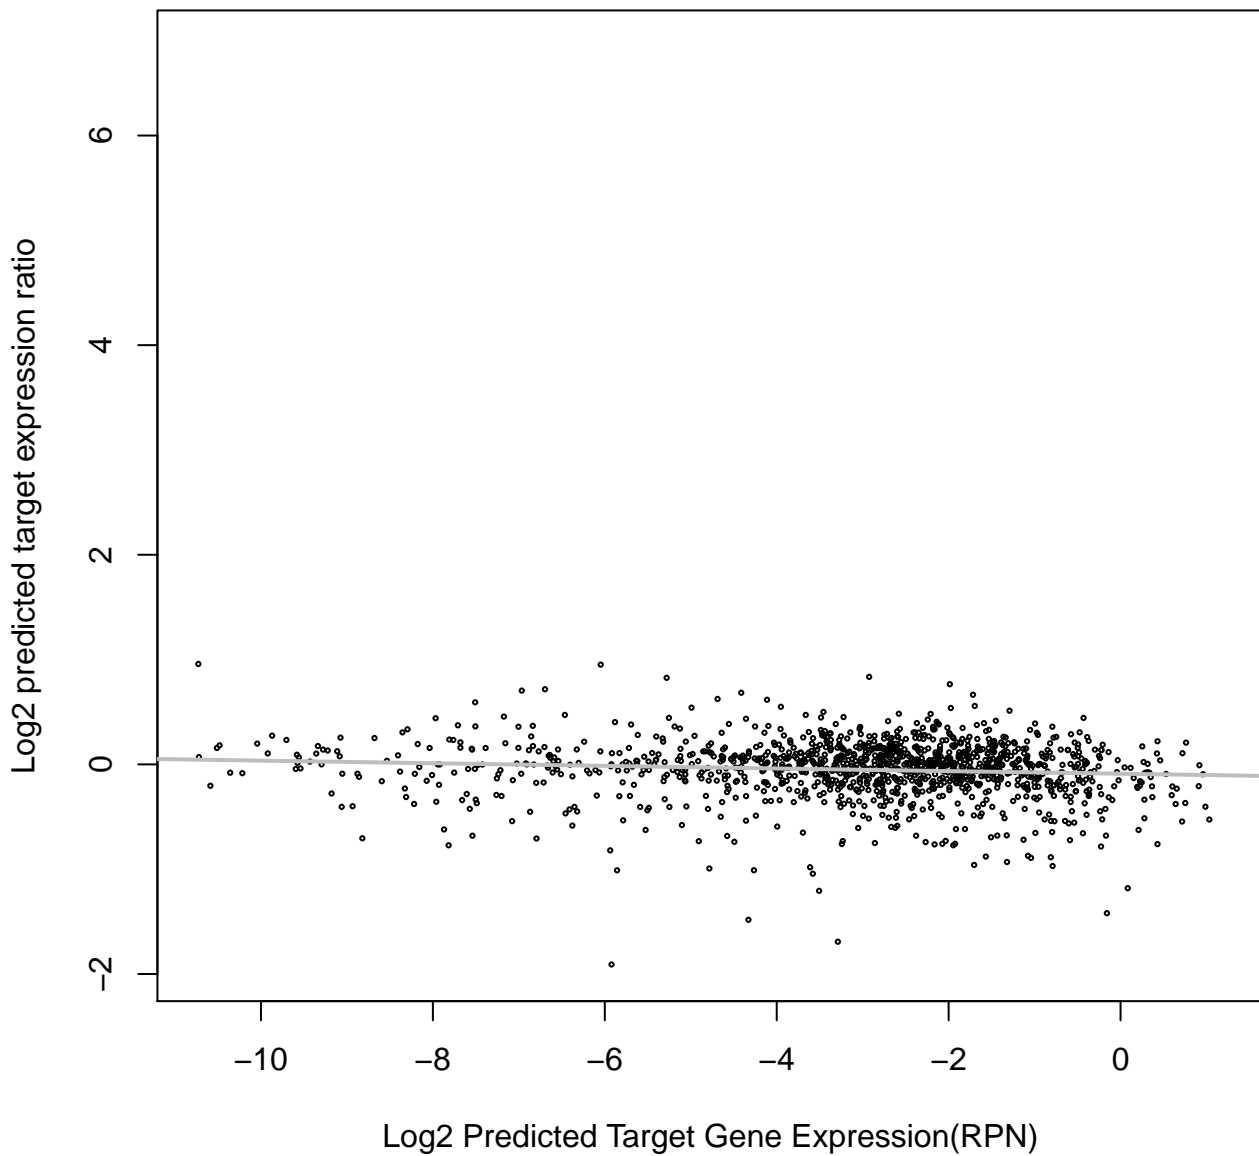

# anderson.sirna-133 – PPIB\_H8

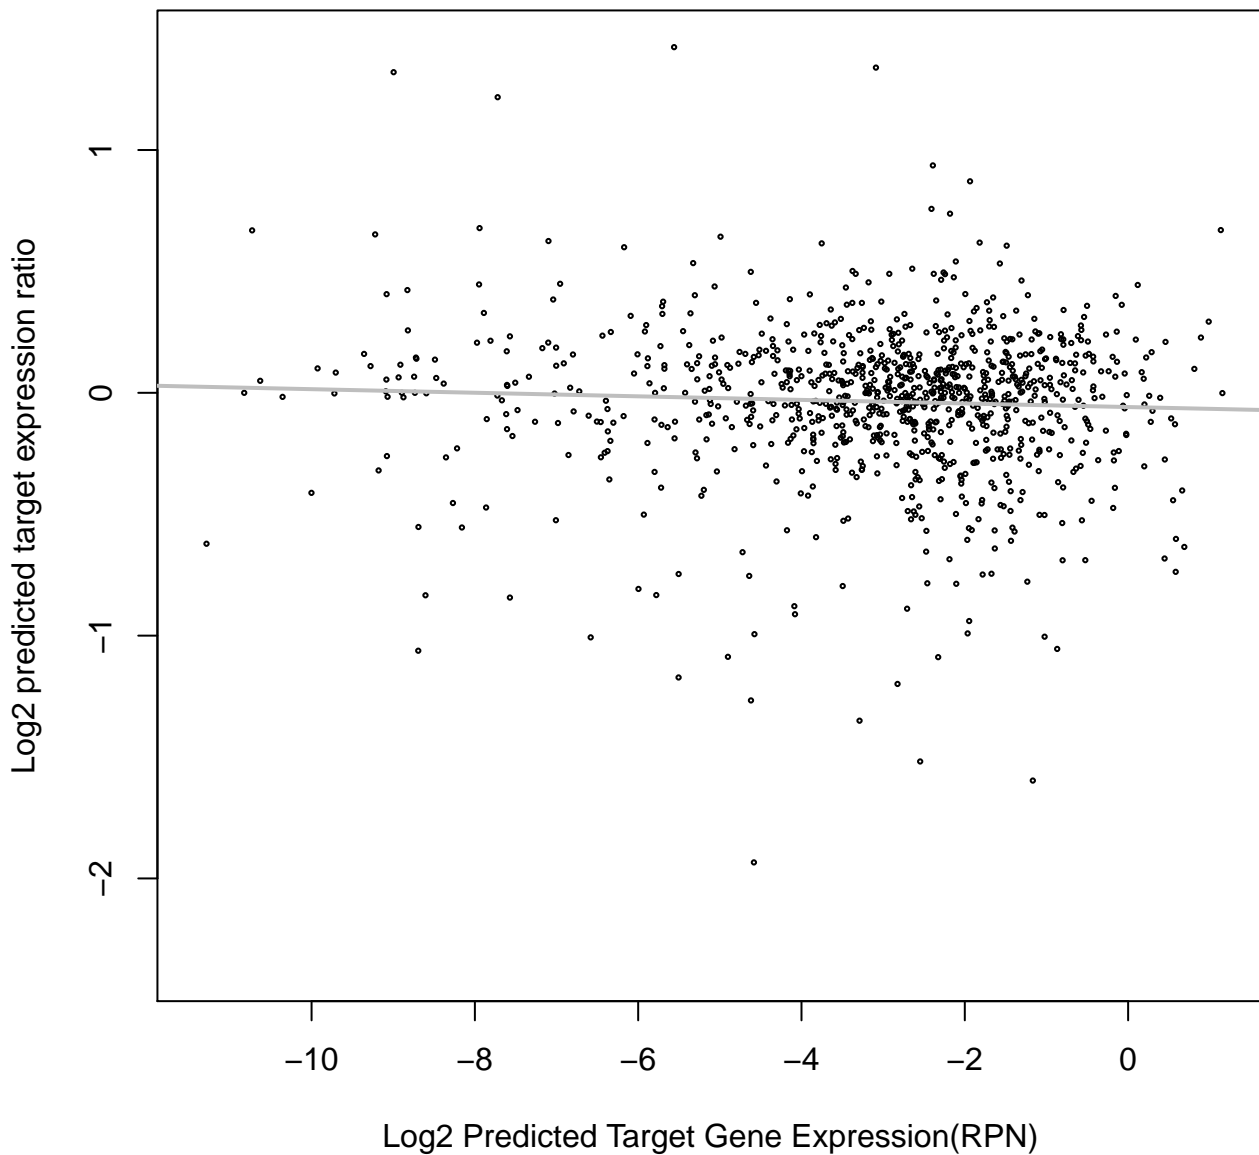

# anderson.sirna-134 - PPIB\_L14

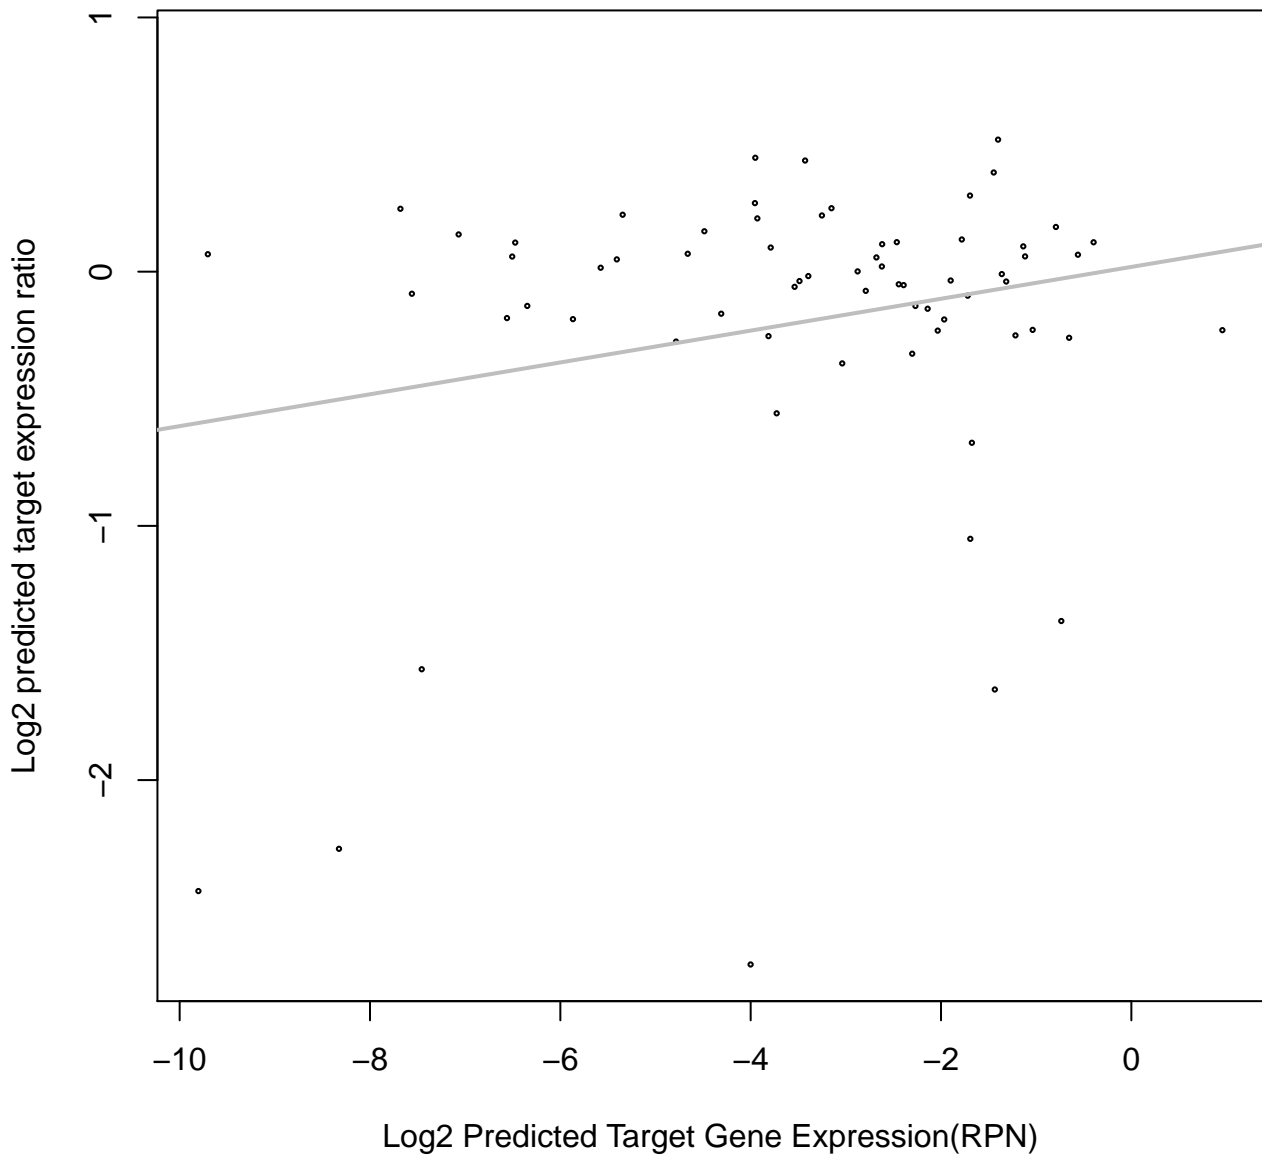

# anderson.sirna-135 - PPIB\_L18

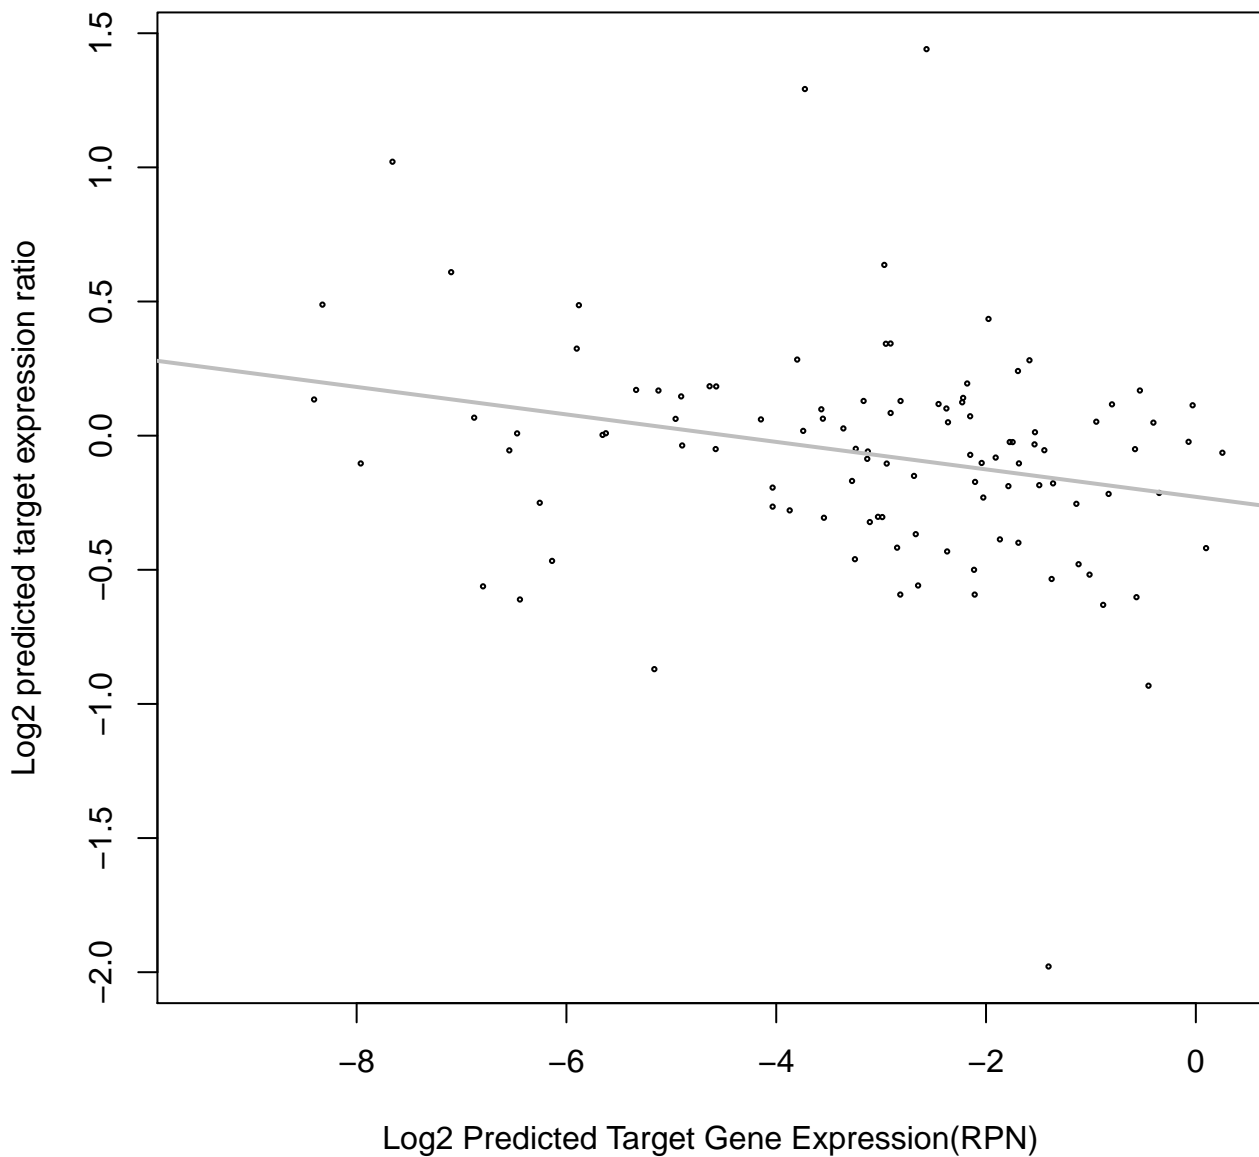

# anderson.sirna-136 - PPIB\_L1

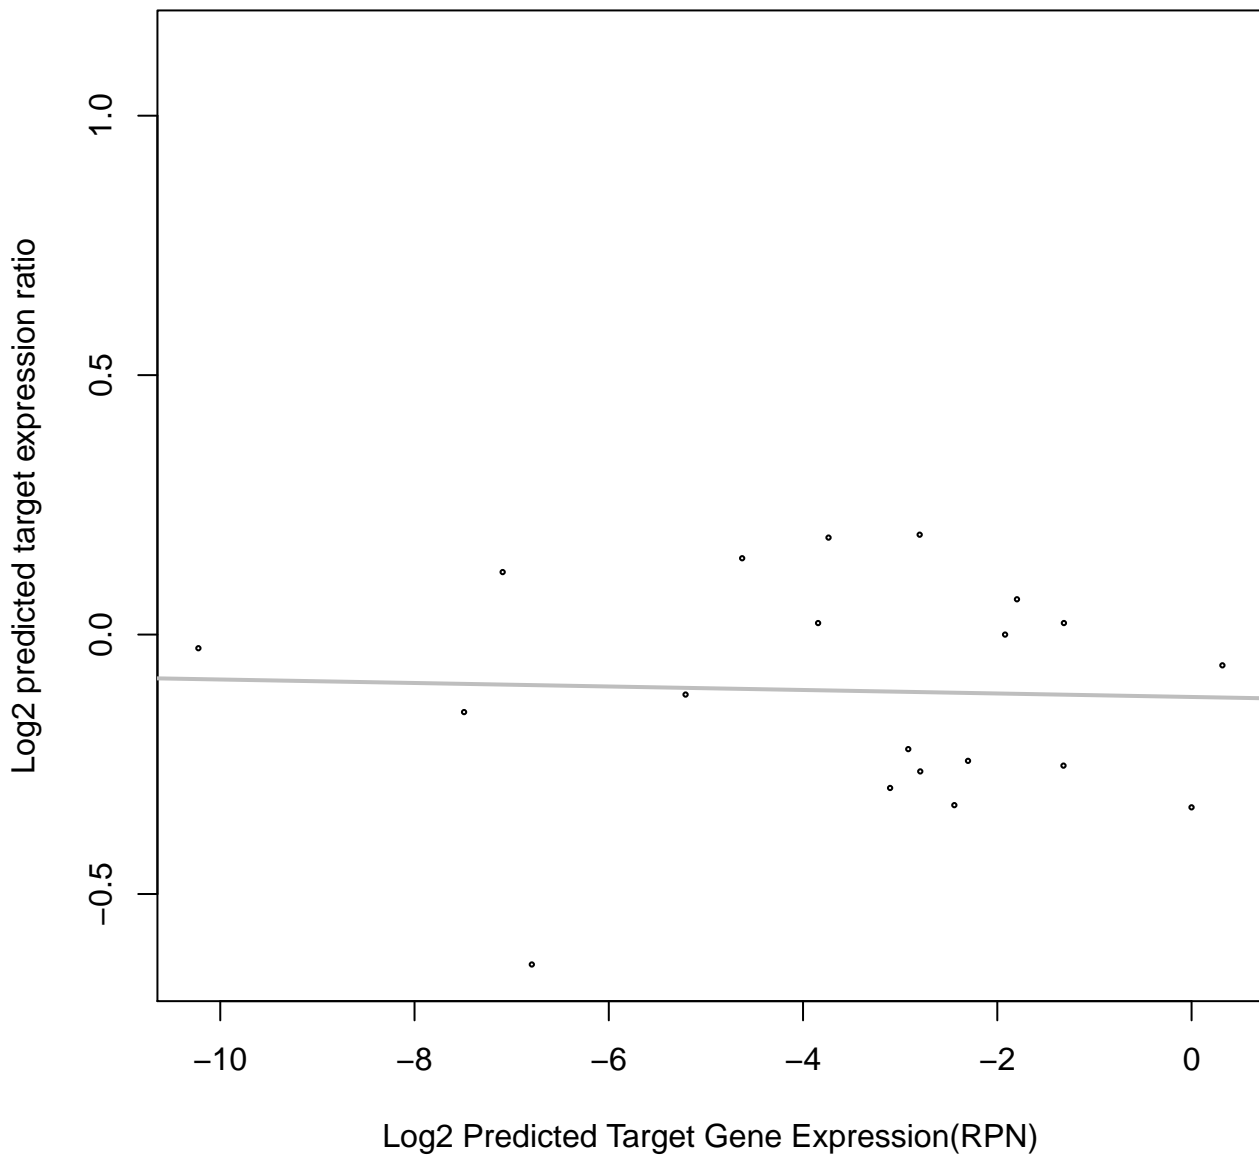

# anderson.sirna-137 - PPIB\_L4

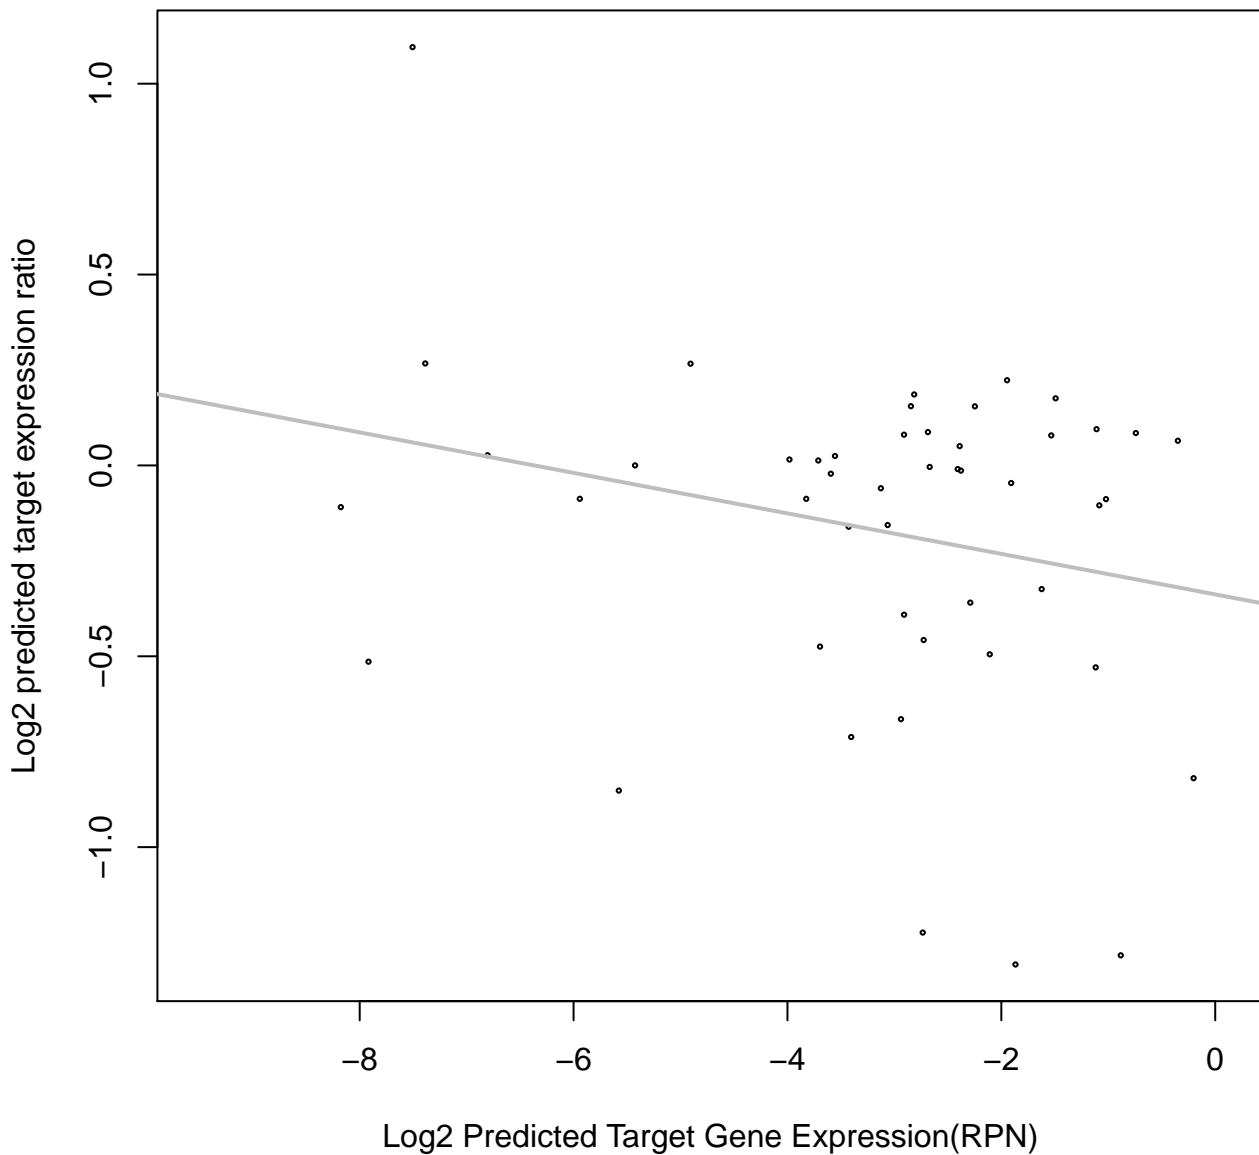

# anderson.sirna-138 - PPIB\_L5

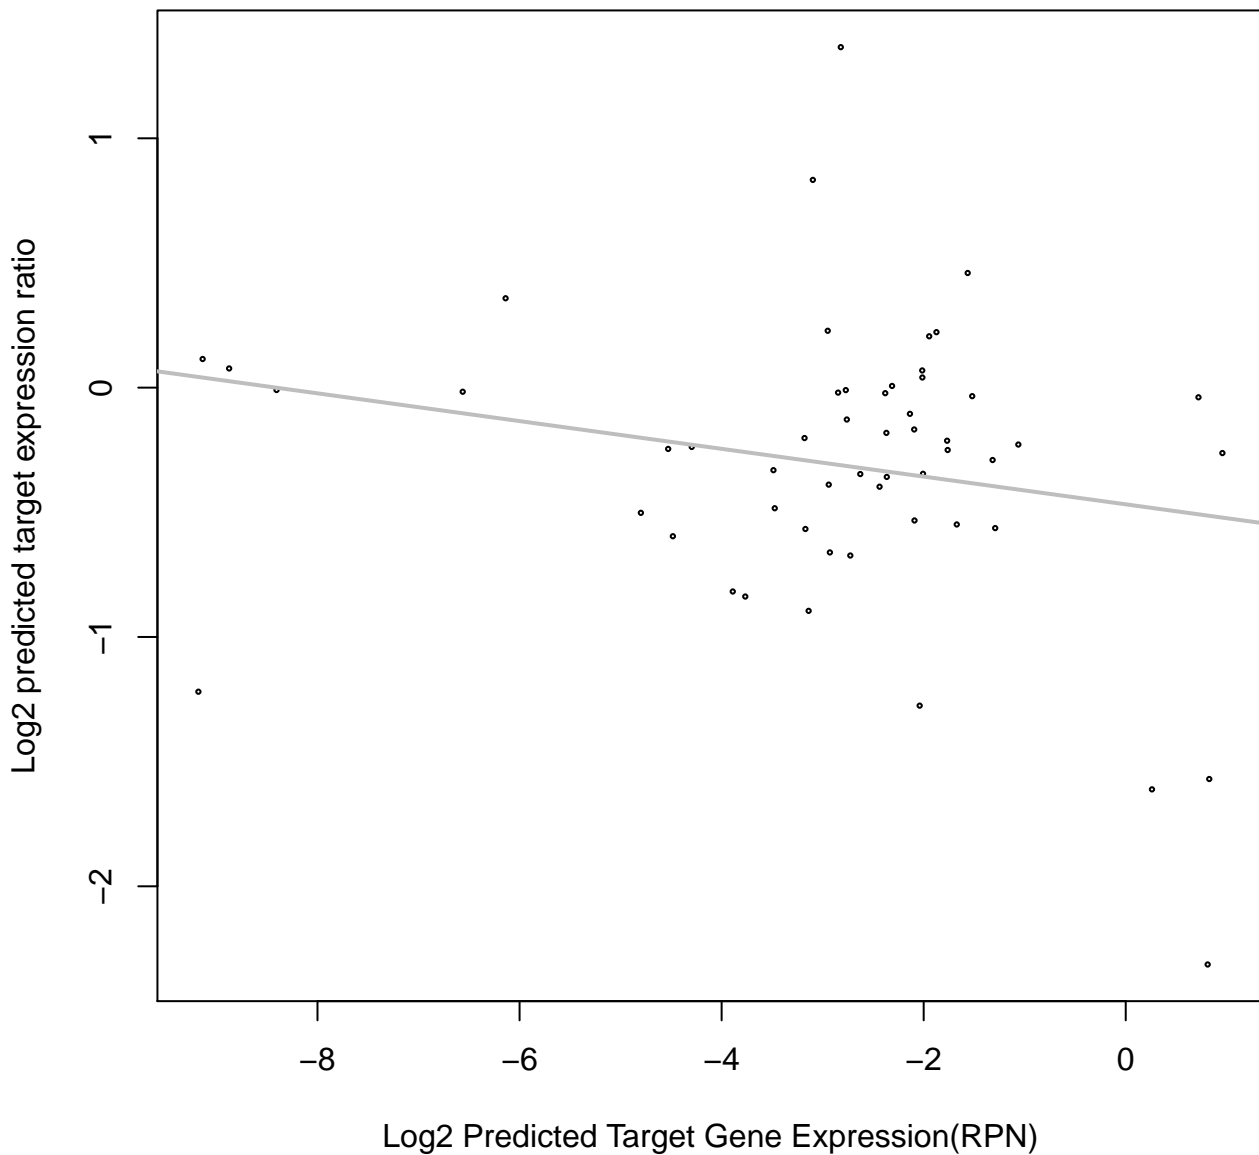

# anderson.sirna-139 – PPIB\_M11

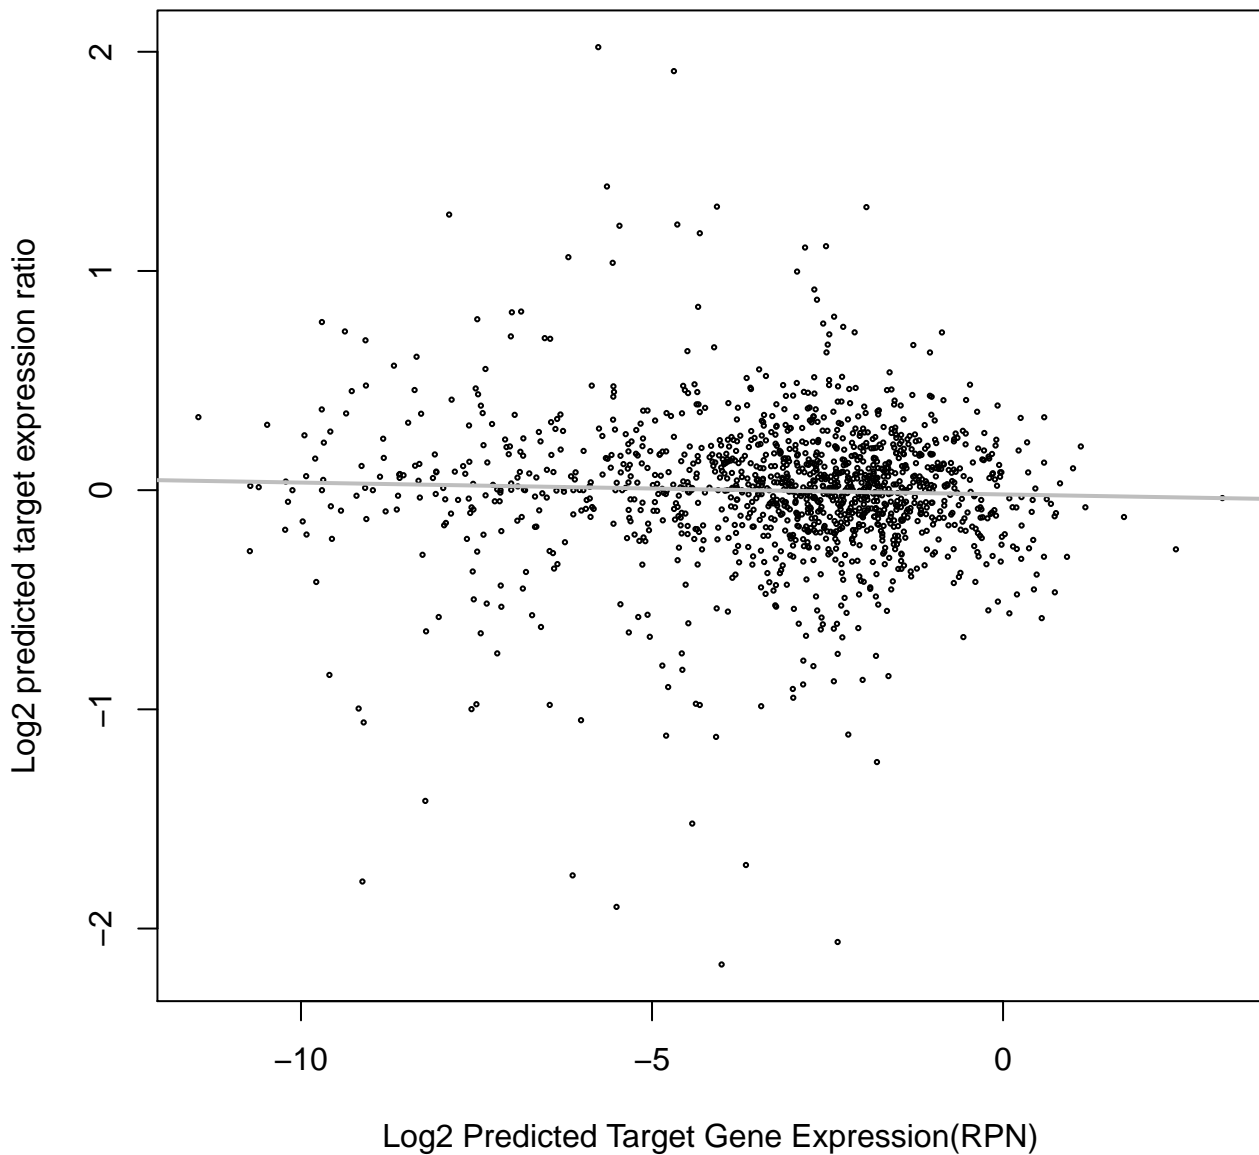



# anderson.sirna-140 - PPIB\_M14

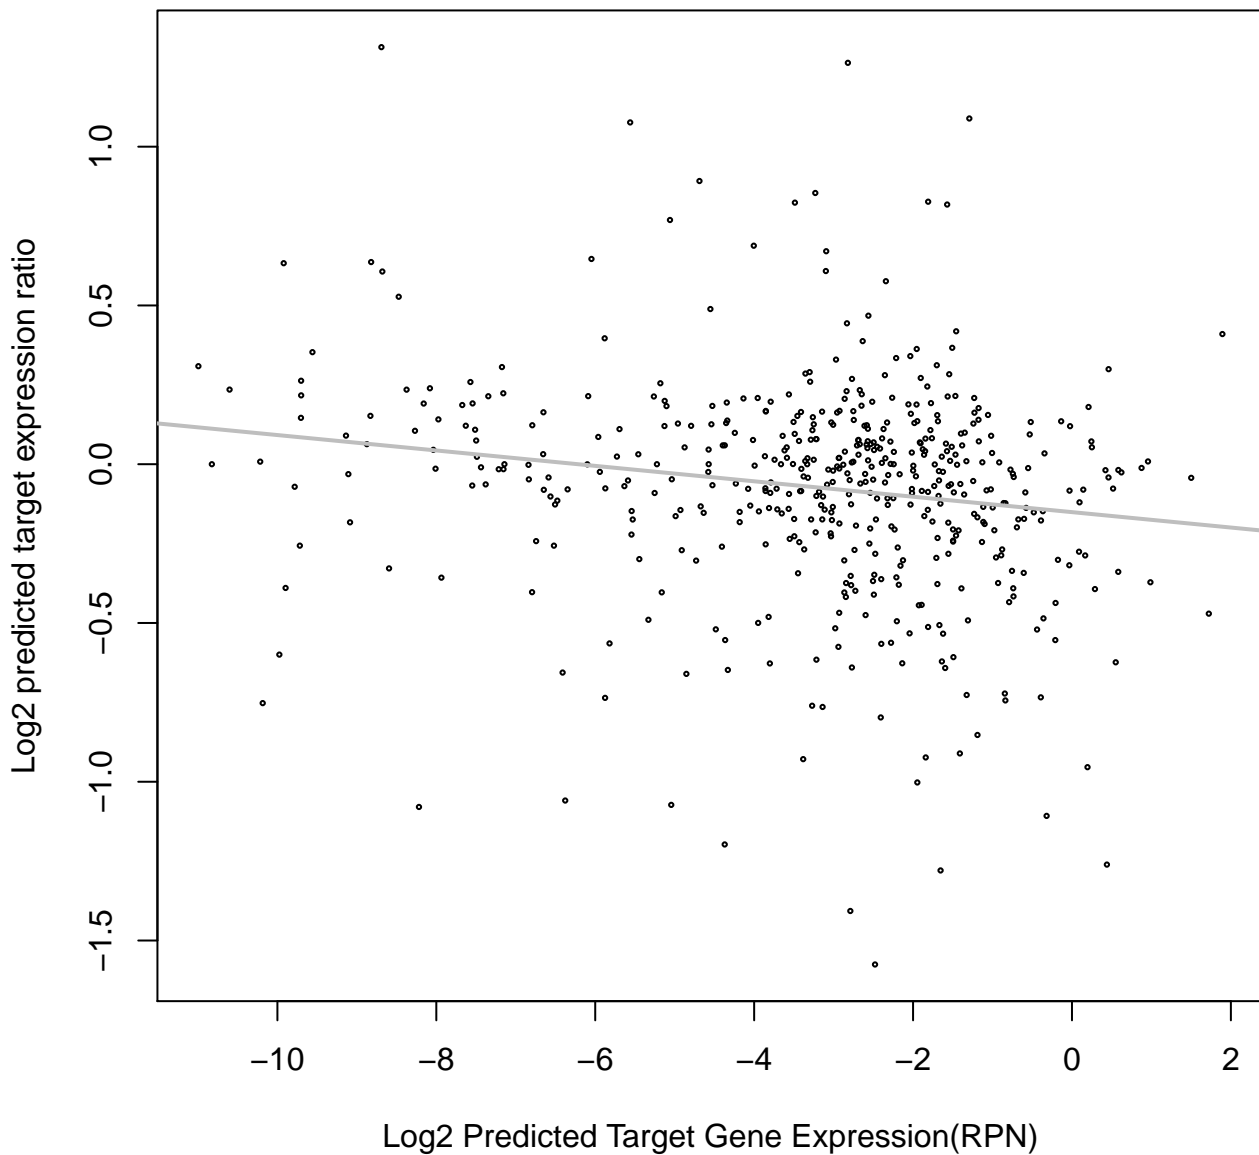

# anderson.sirna-141 - PPIB\_M18

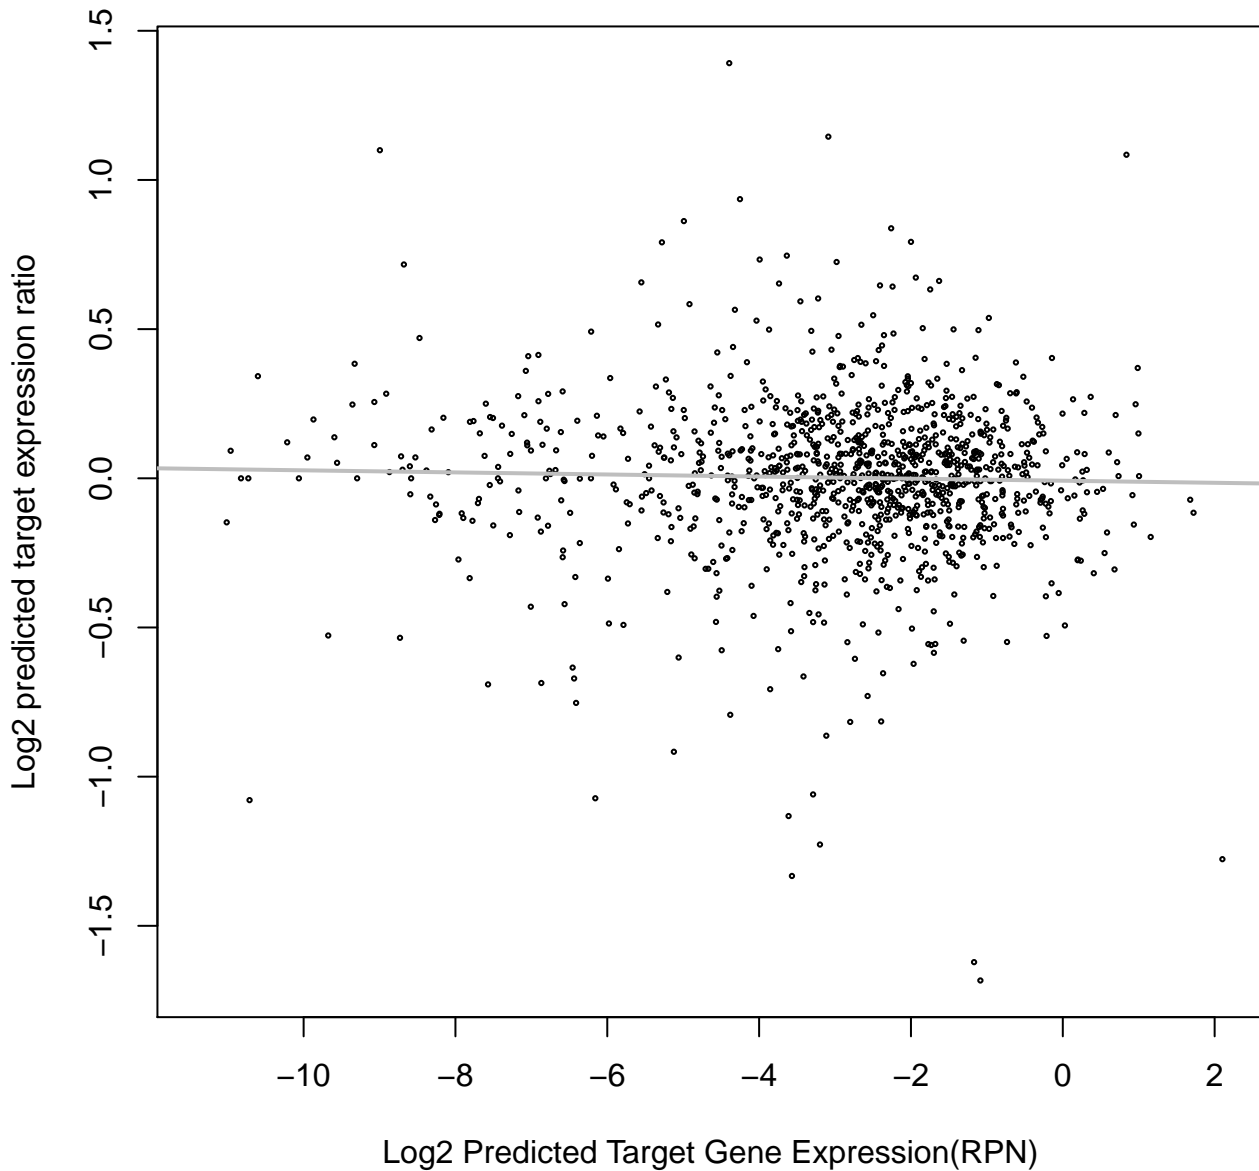

# anderson.sirna-142 - PPIB\_M1

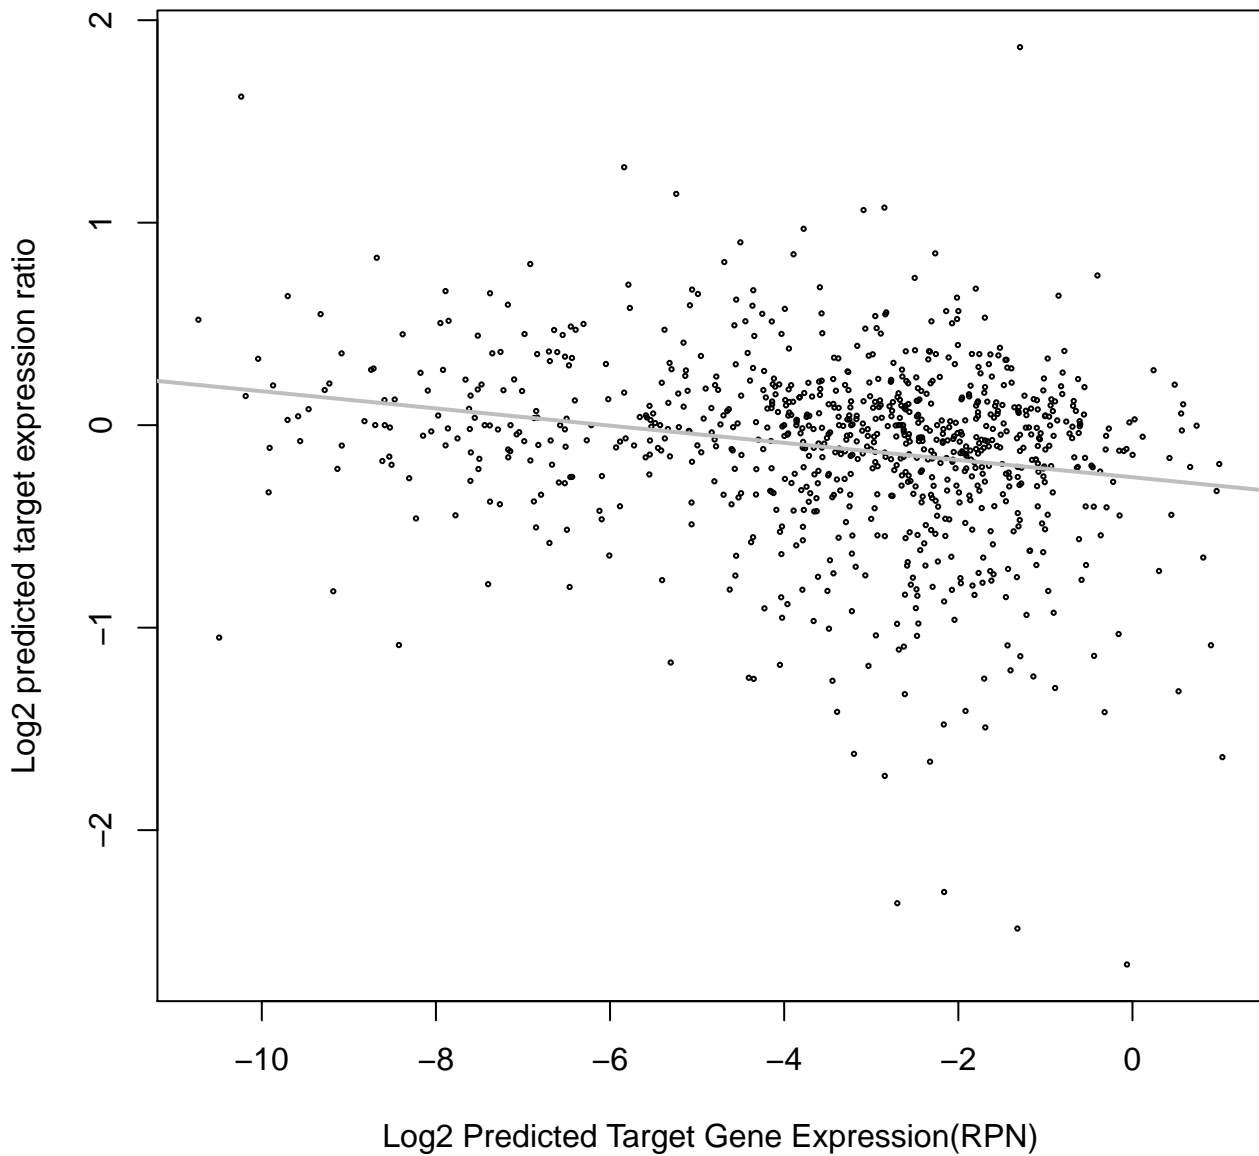

# anderson.sirna-143 – PPIB\_M8A

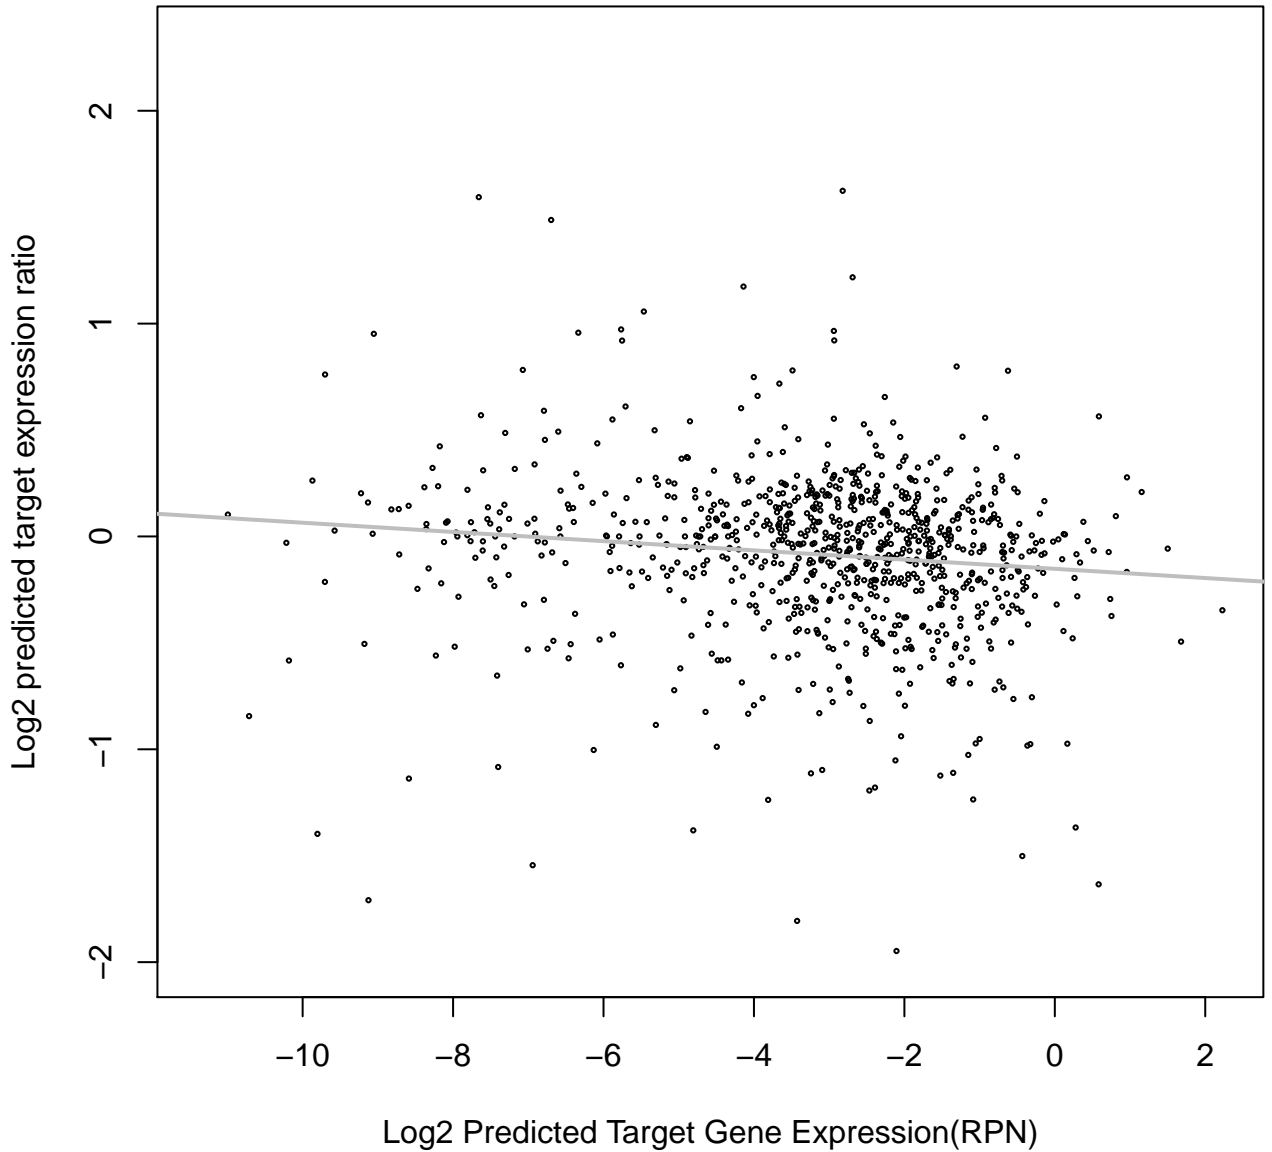

# grimson.12-1 - miR7

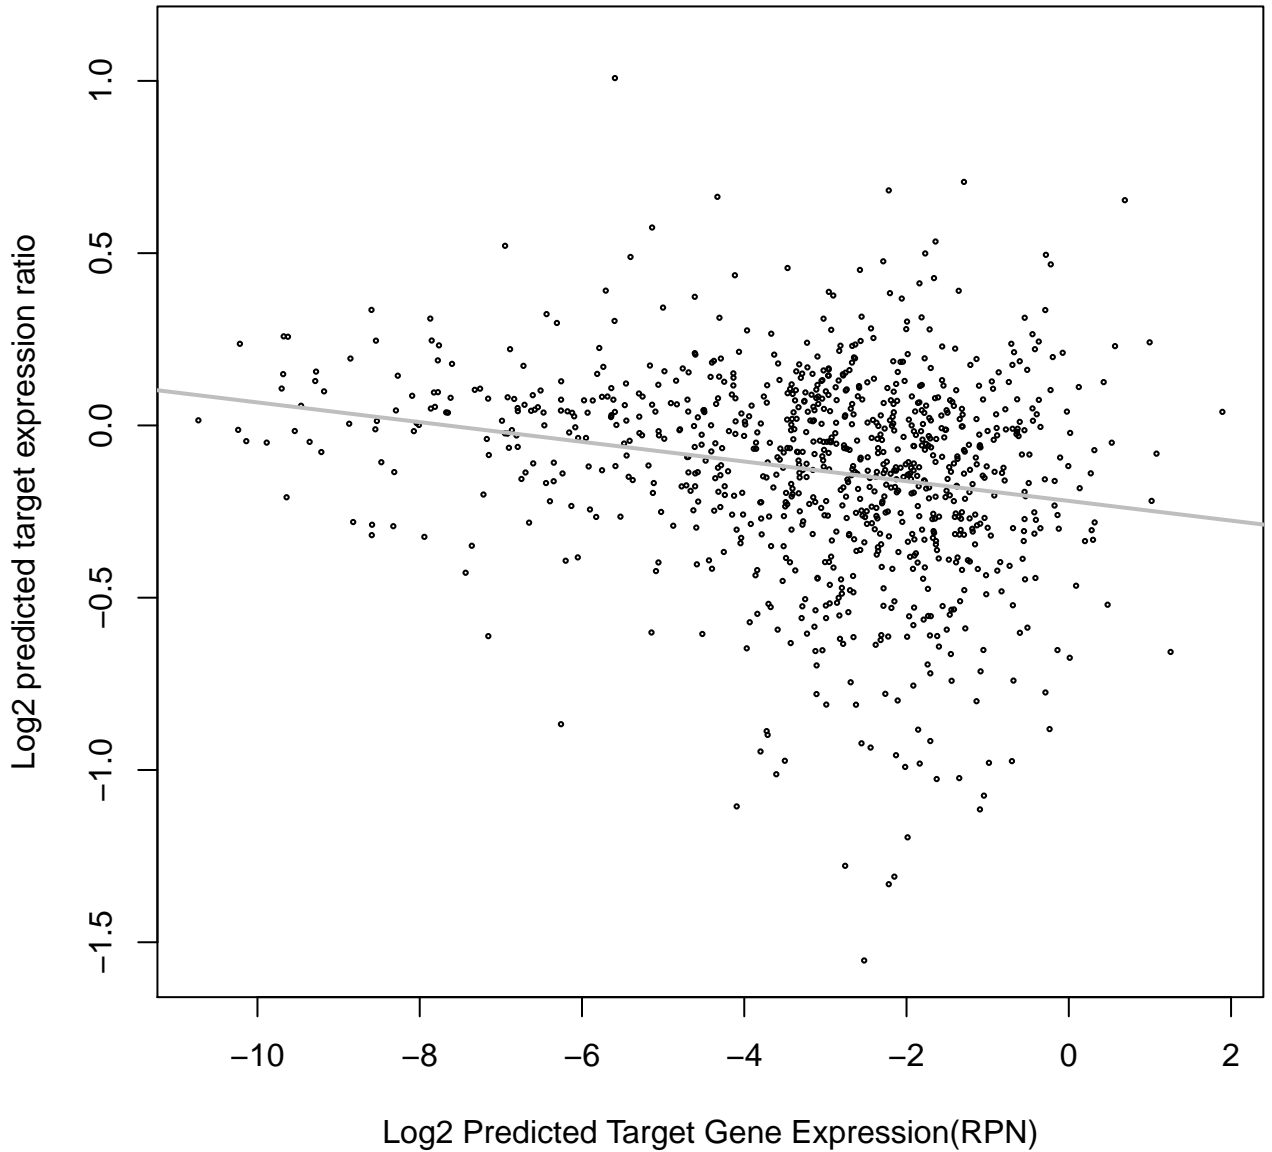

# grimson.12-2 - miR9

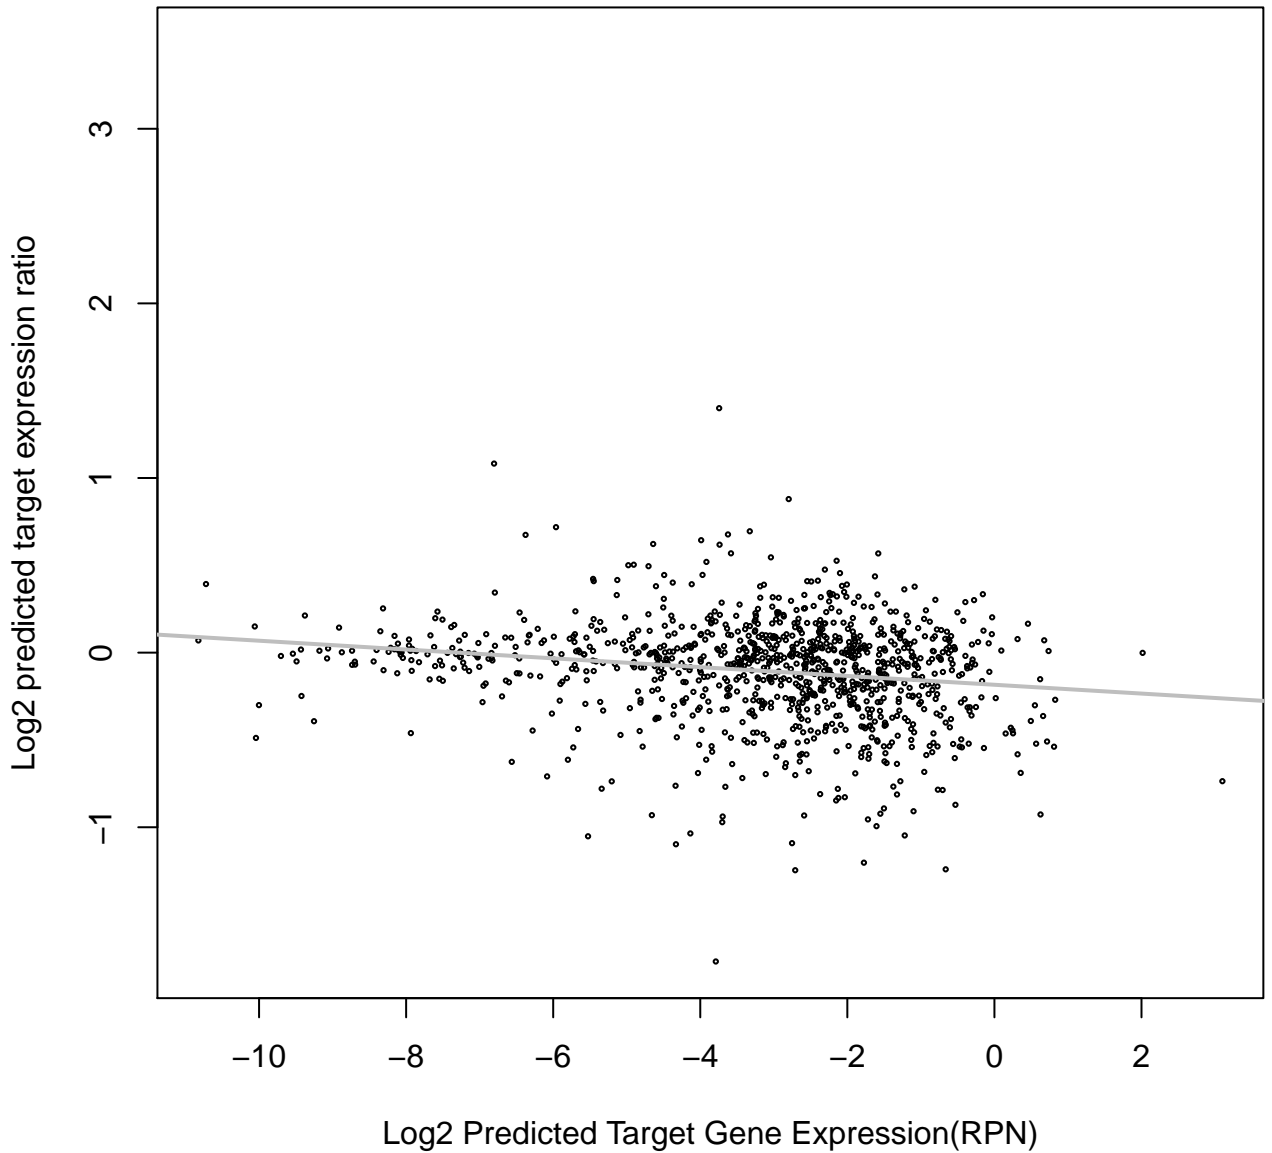

# grimson.12-3 - miR122a

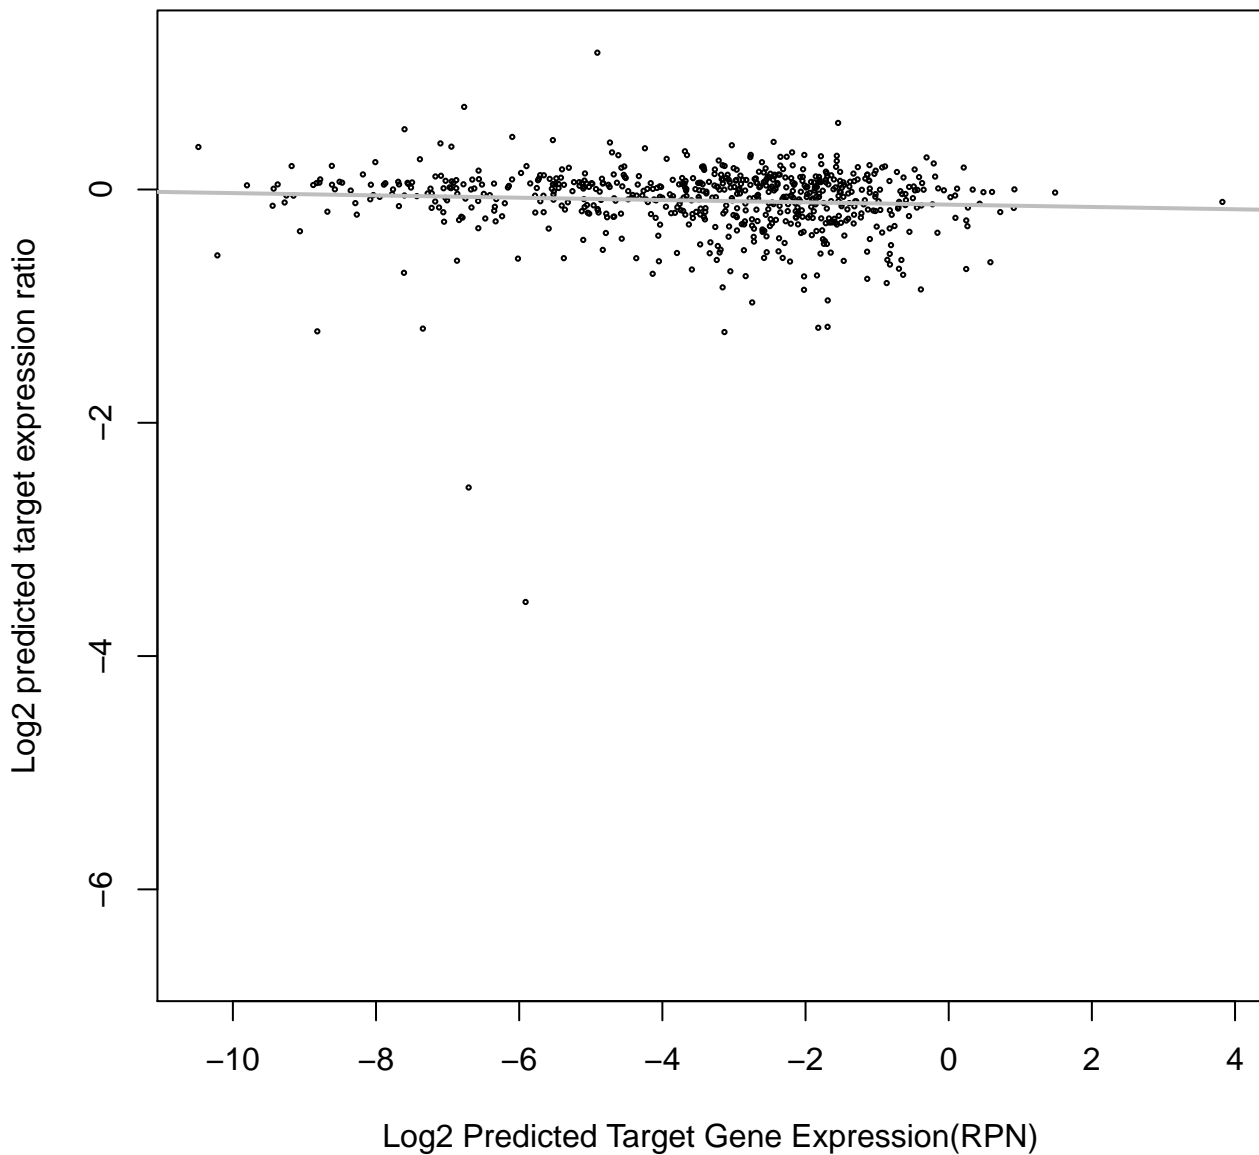

# grimson.12-4 - miR128a

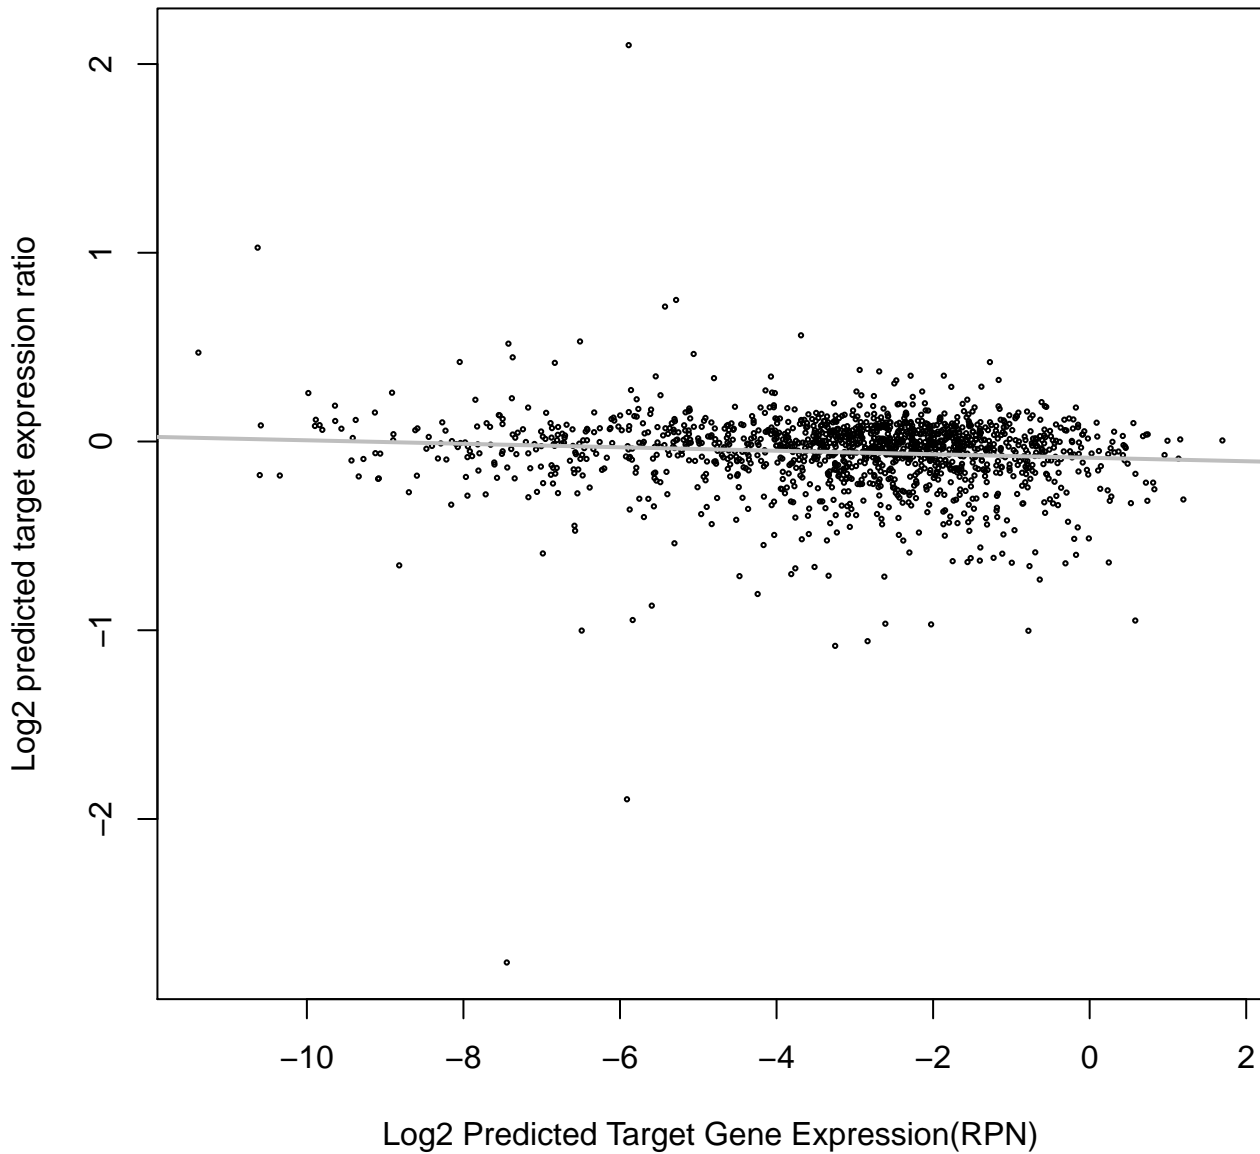



# grimson.12-5 - miR132

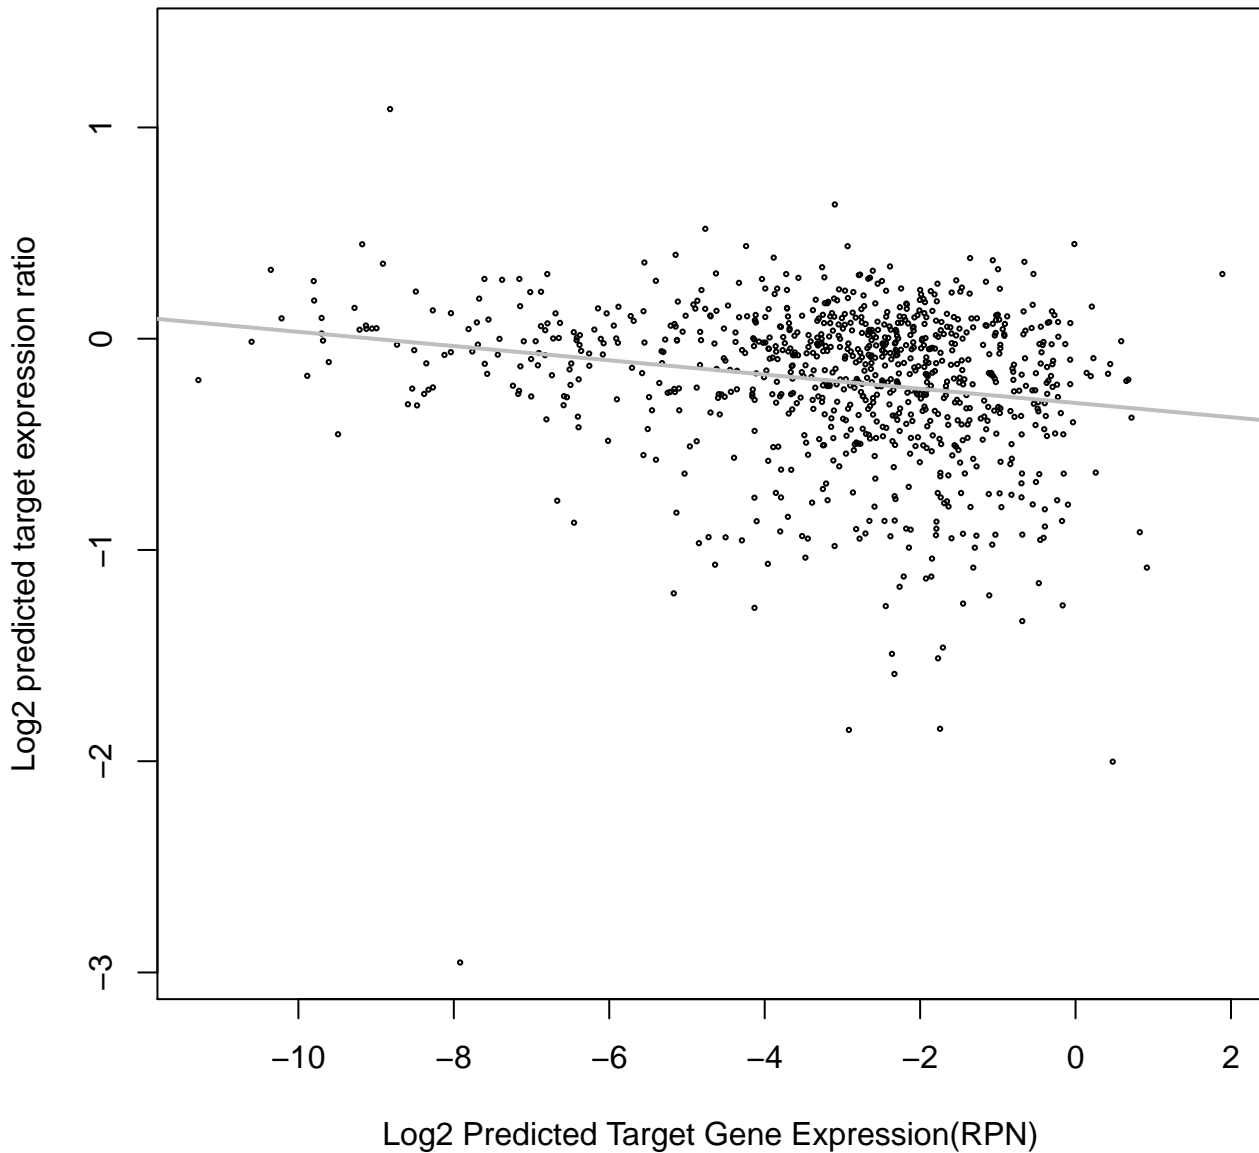

# grimson.12-6 - miR133a

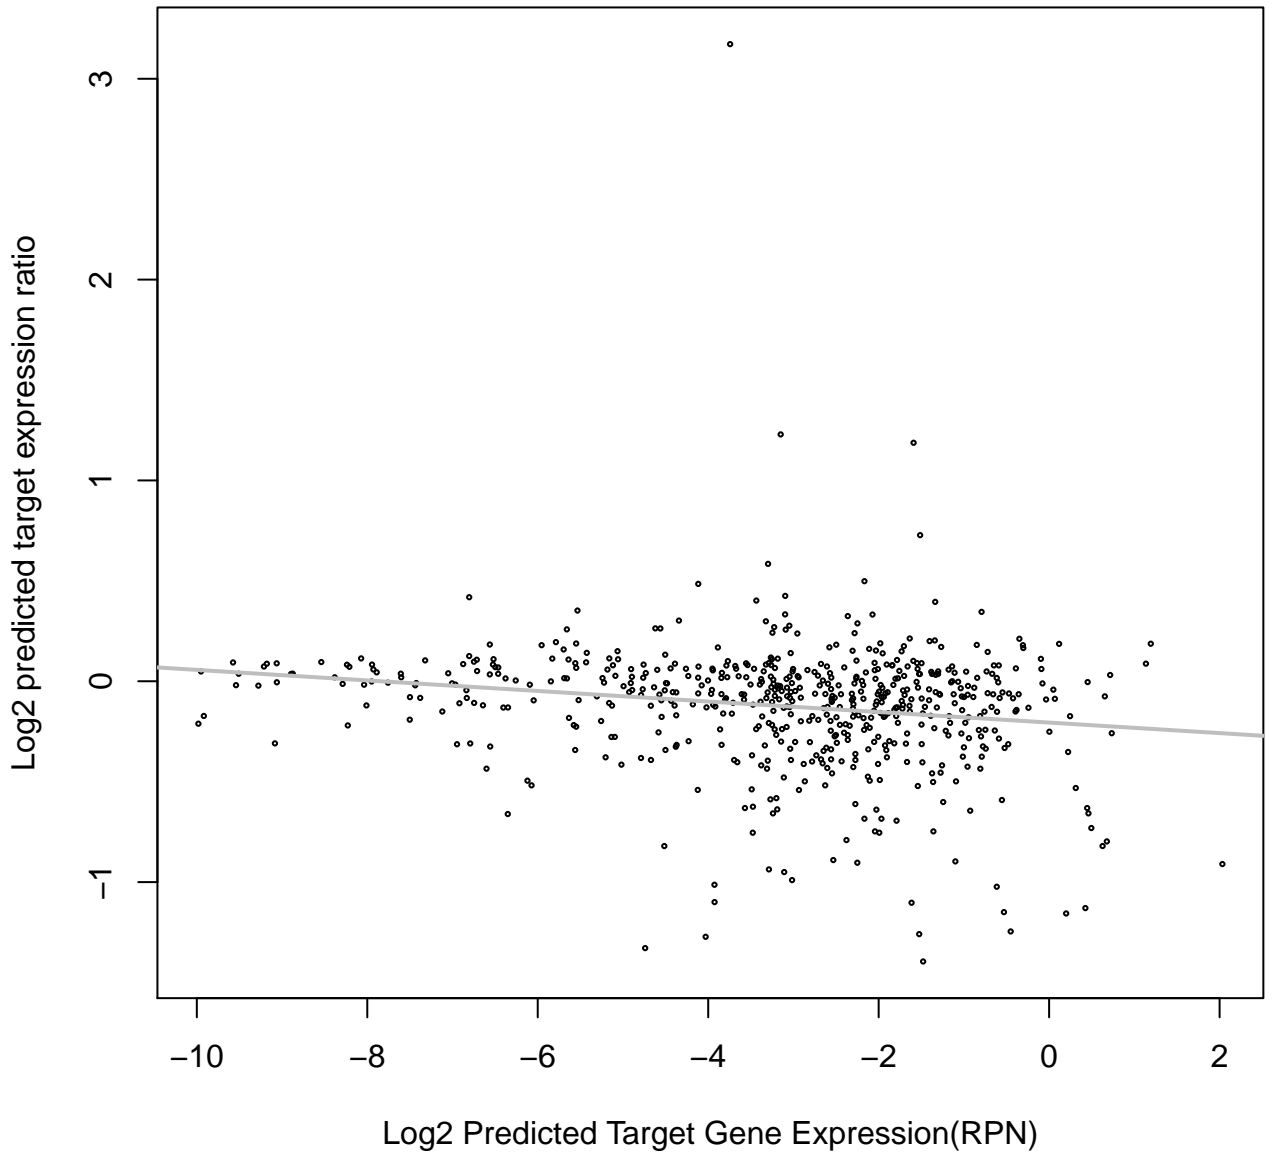

# grimson.12-7 - miR142-3p

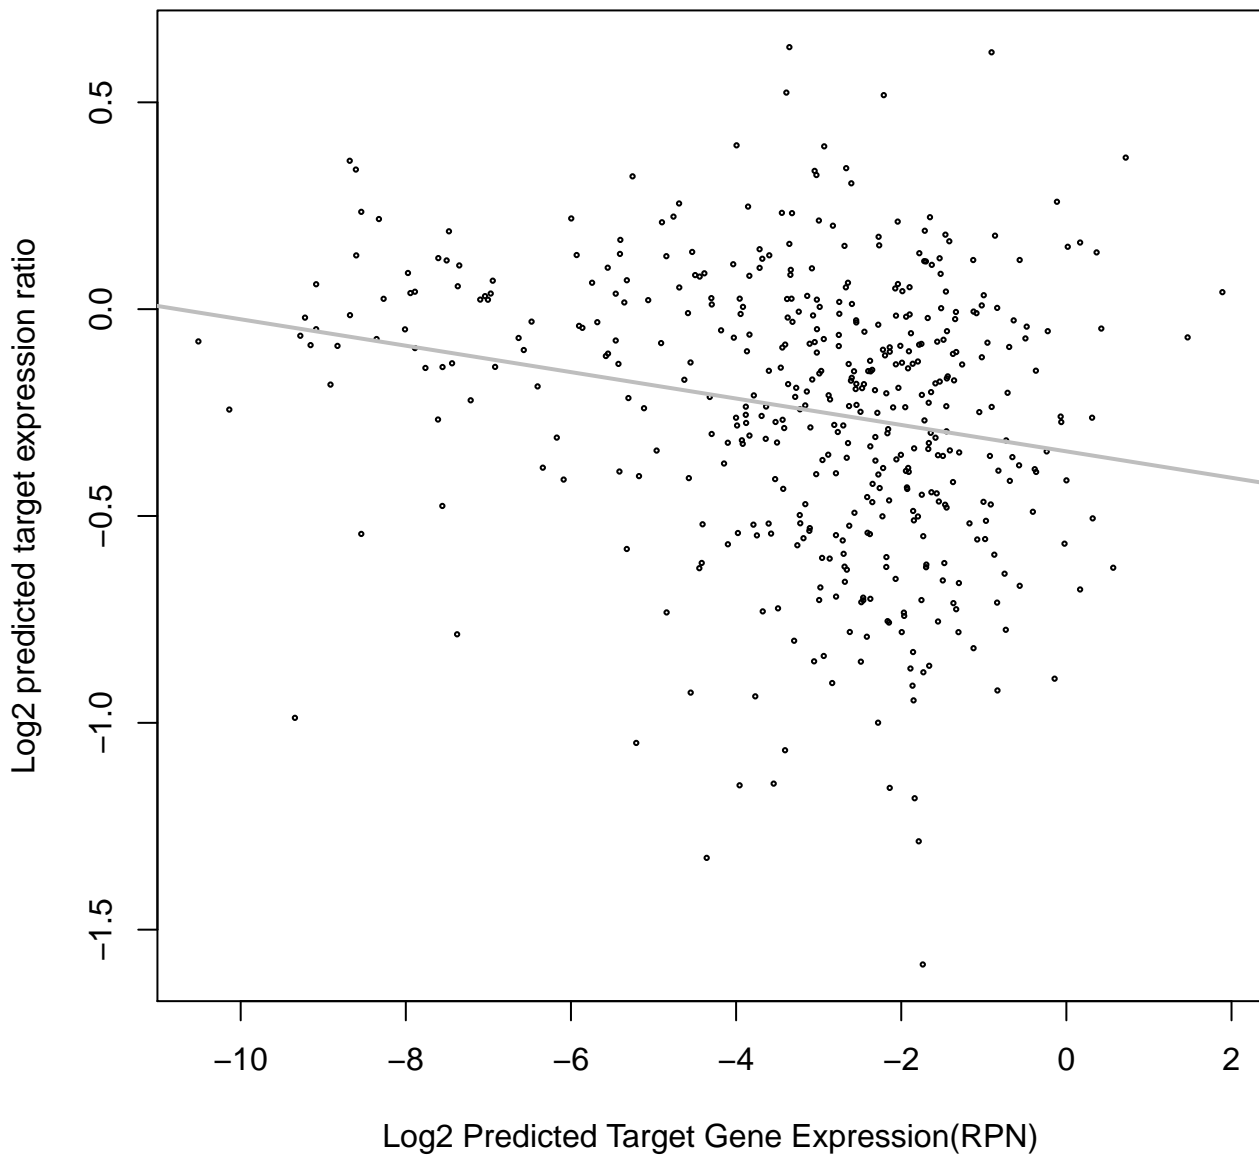

# grimson.12-8 - miR148b

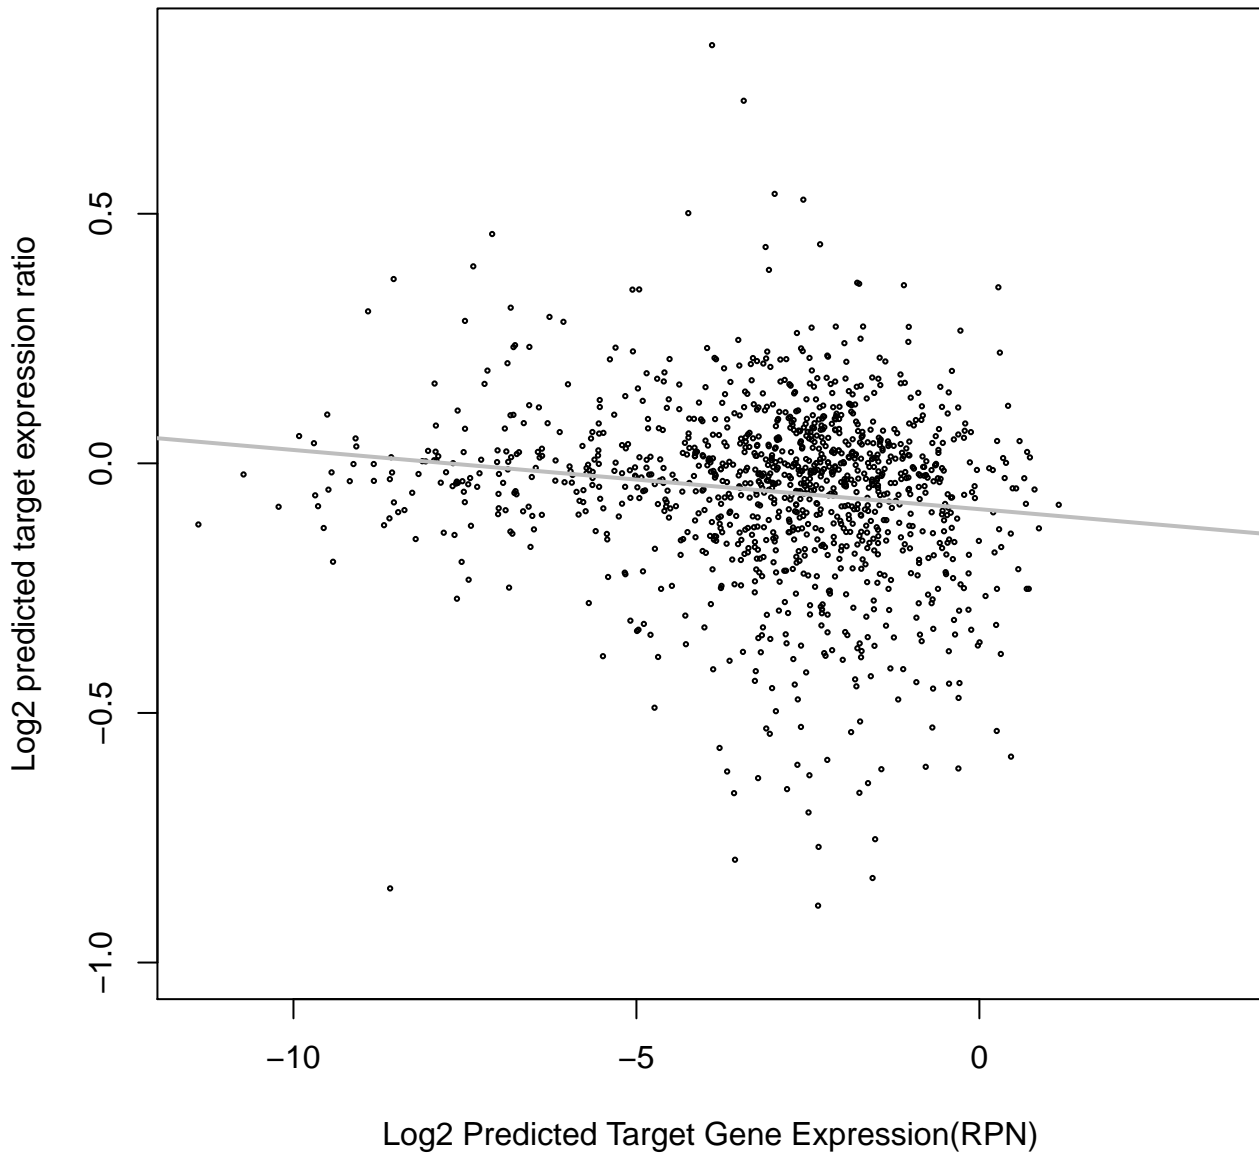

# grimson.12-9 - miR181a

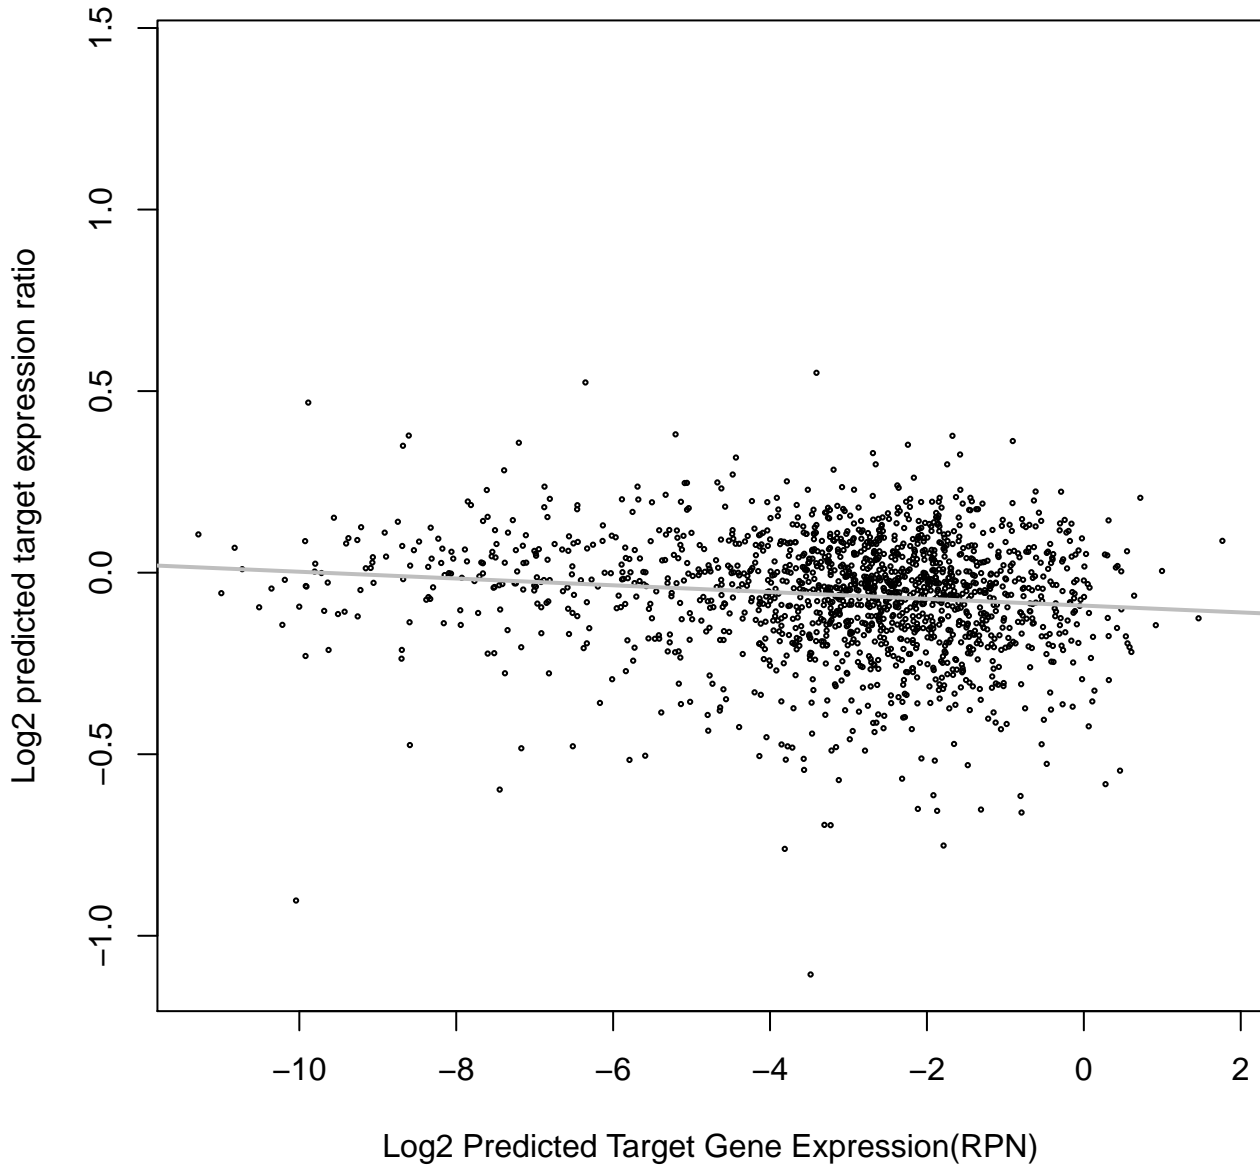

# grimson.24-10 - miR7

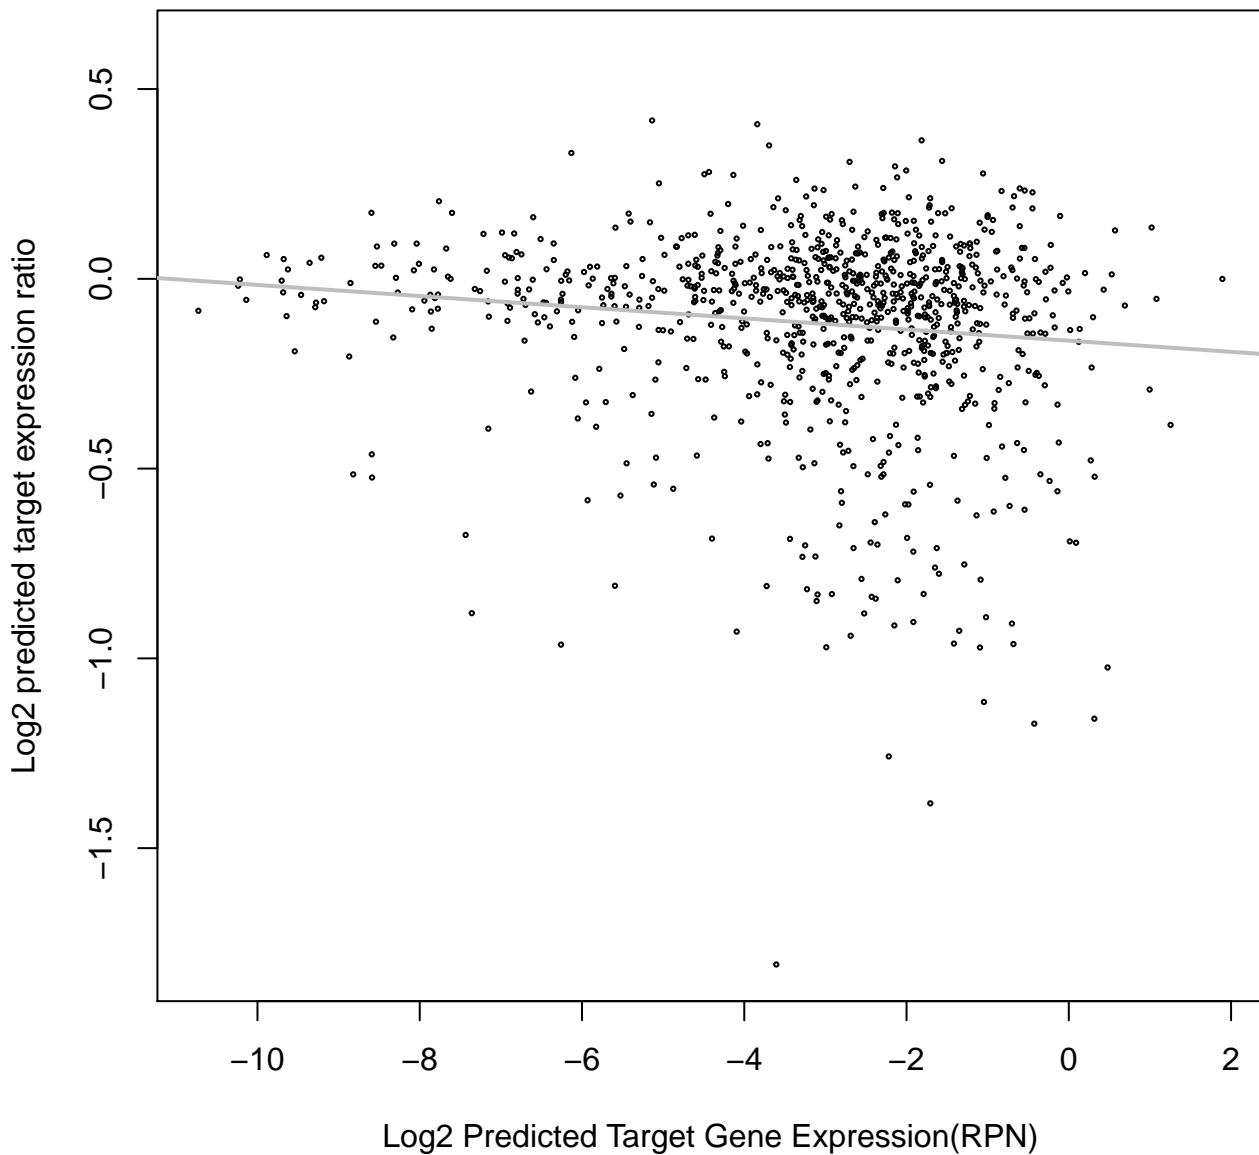

# grimson.24-11 - miR9

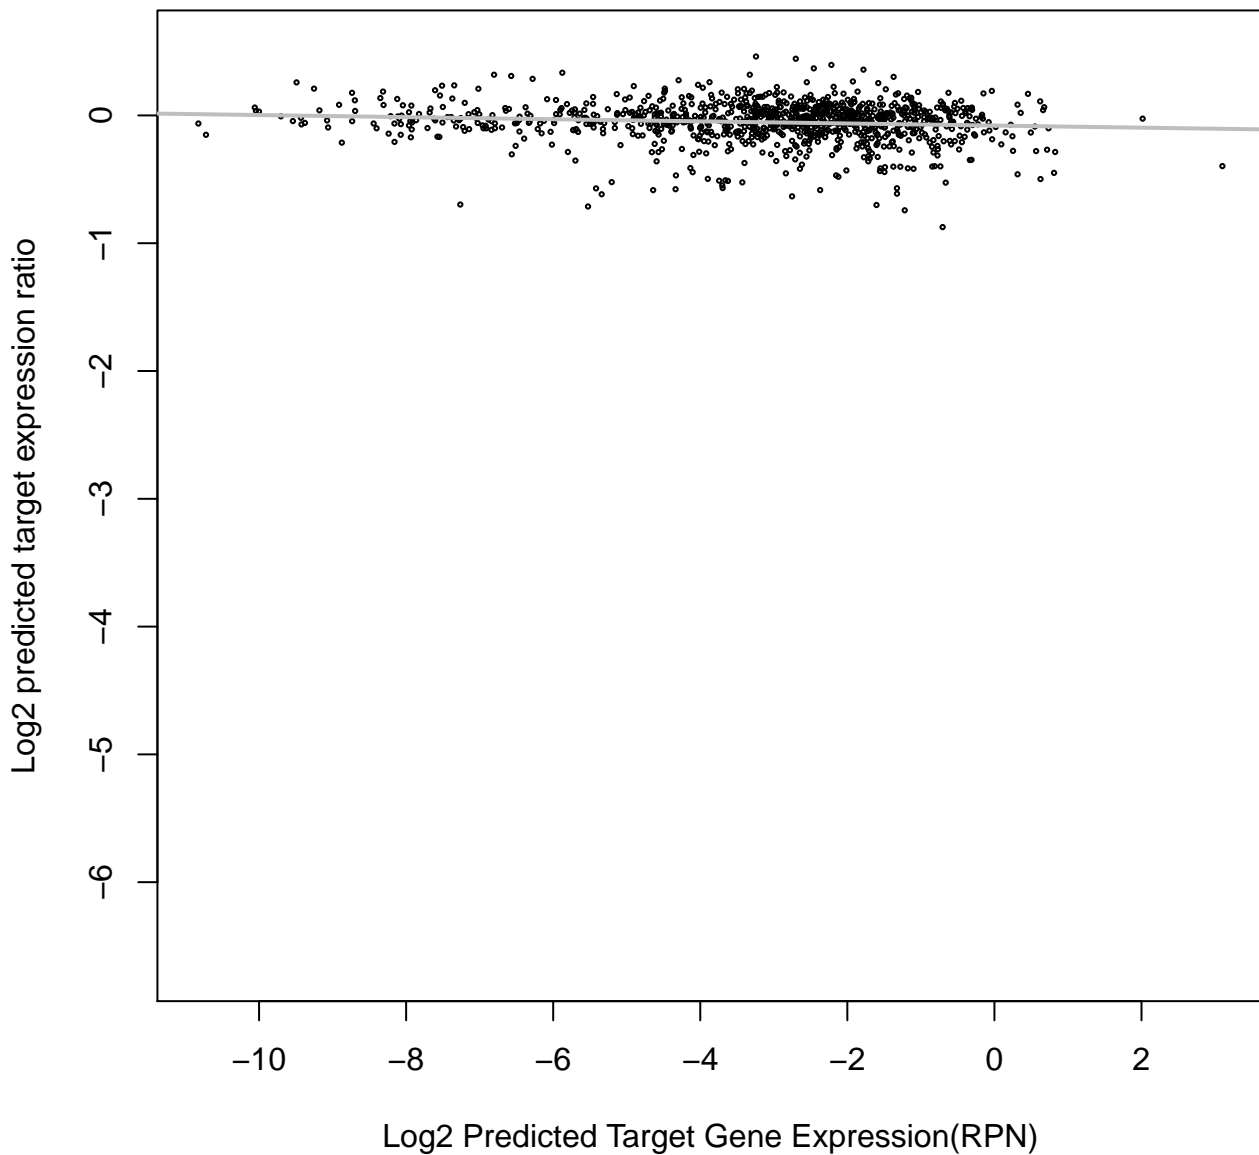

# grimson.24-12 - miR122a

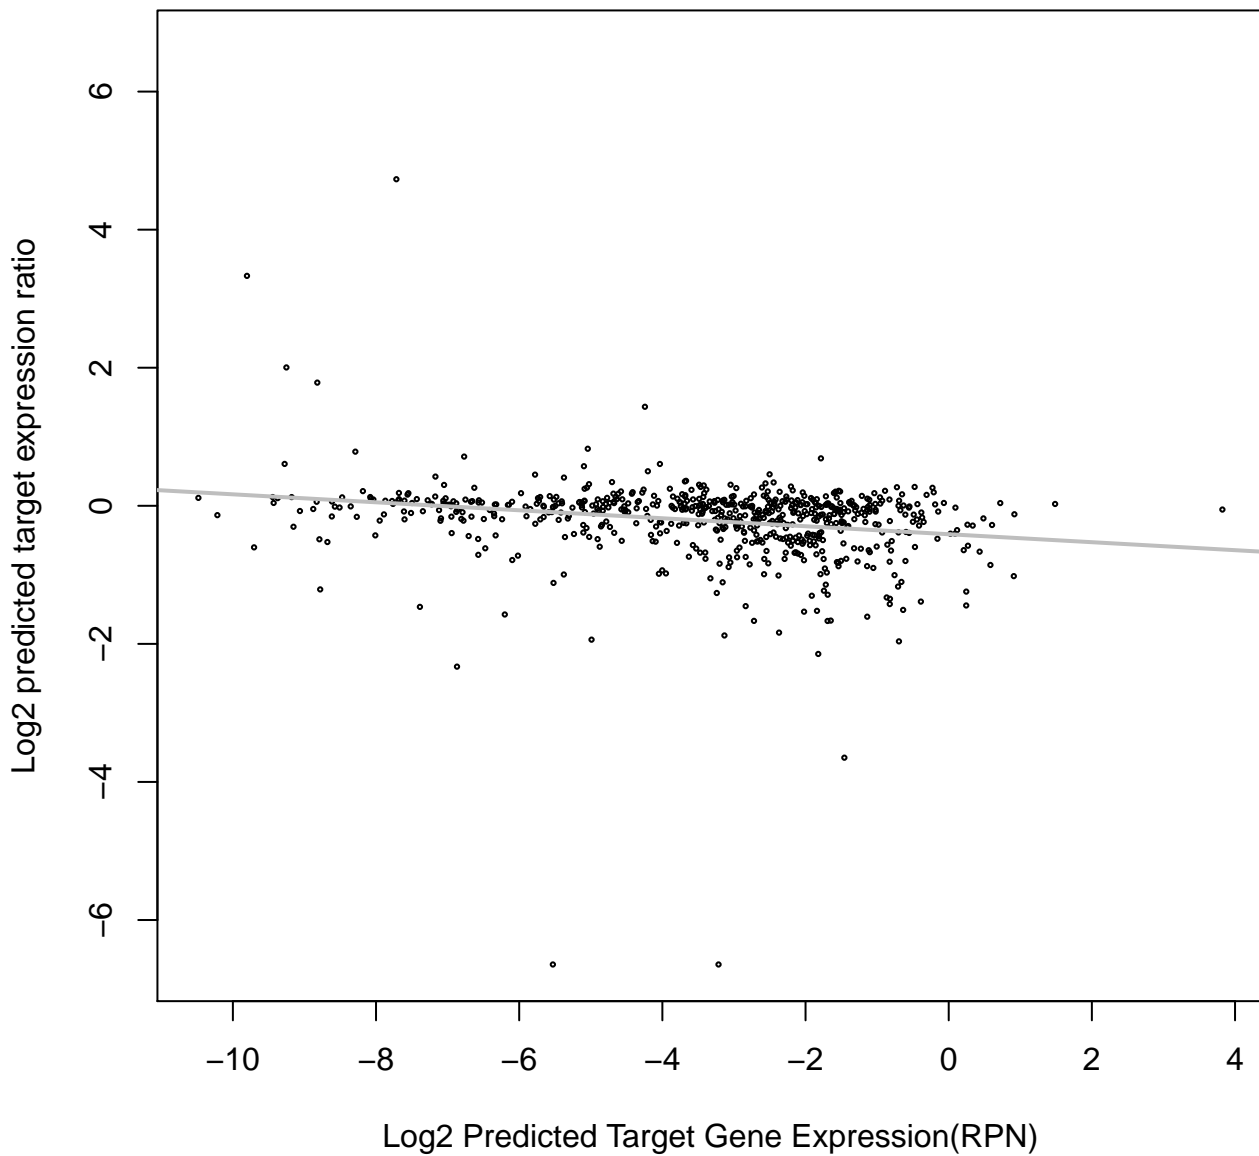



# grimson.24-13 - miR128a

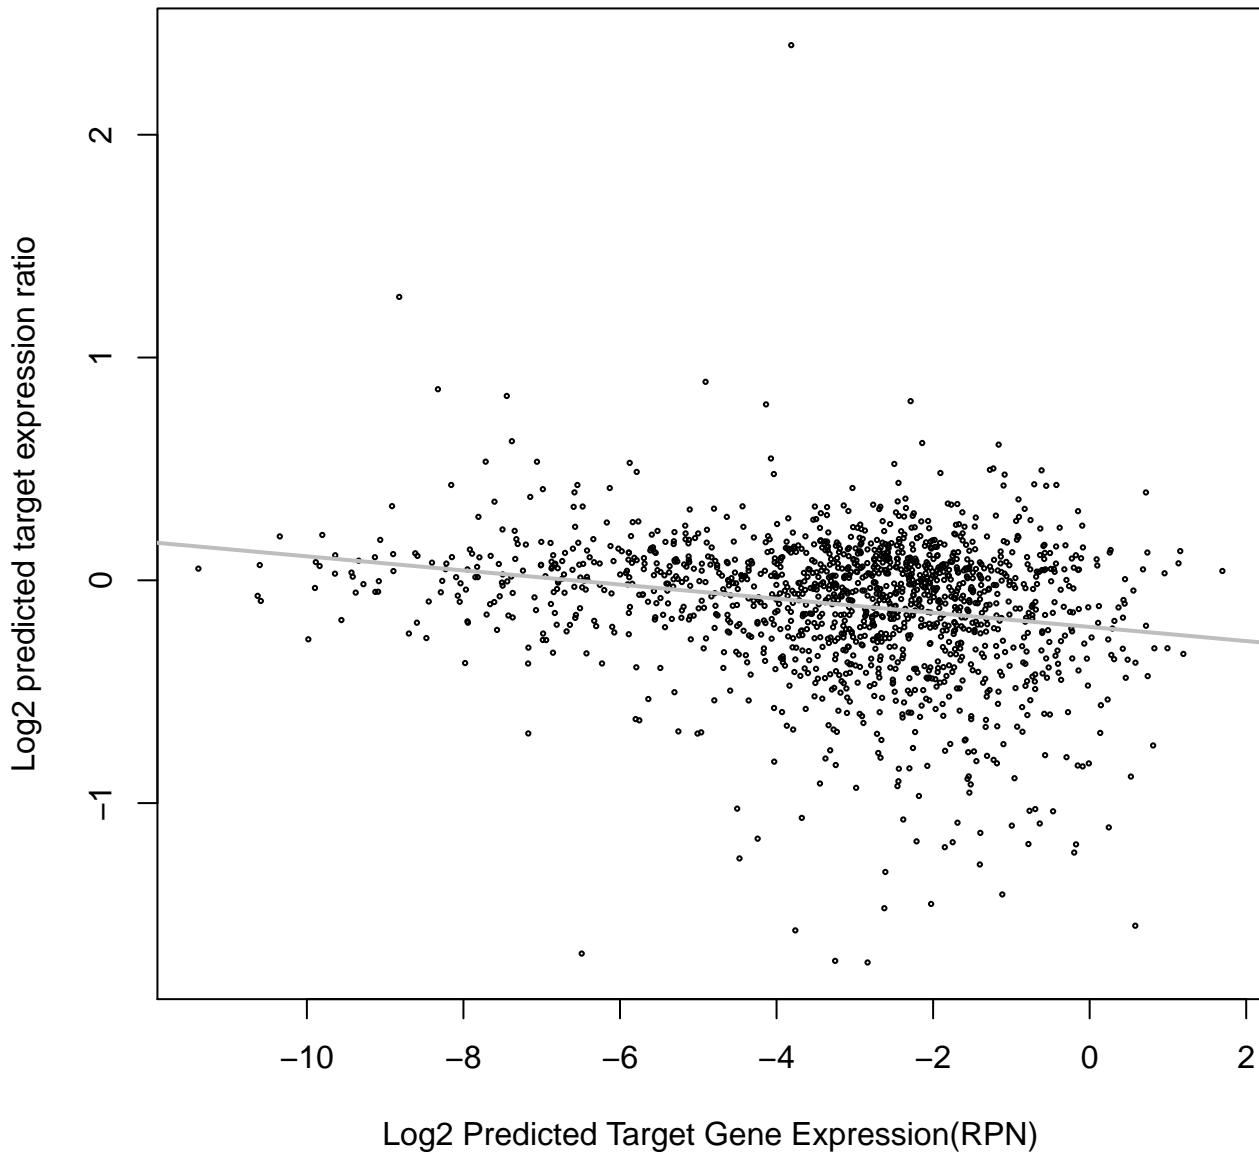

# grimson.24-14 - miR132

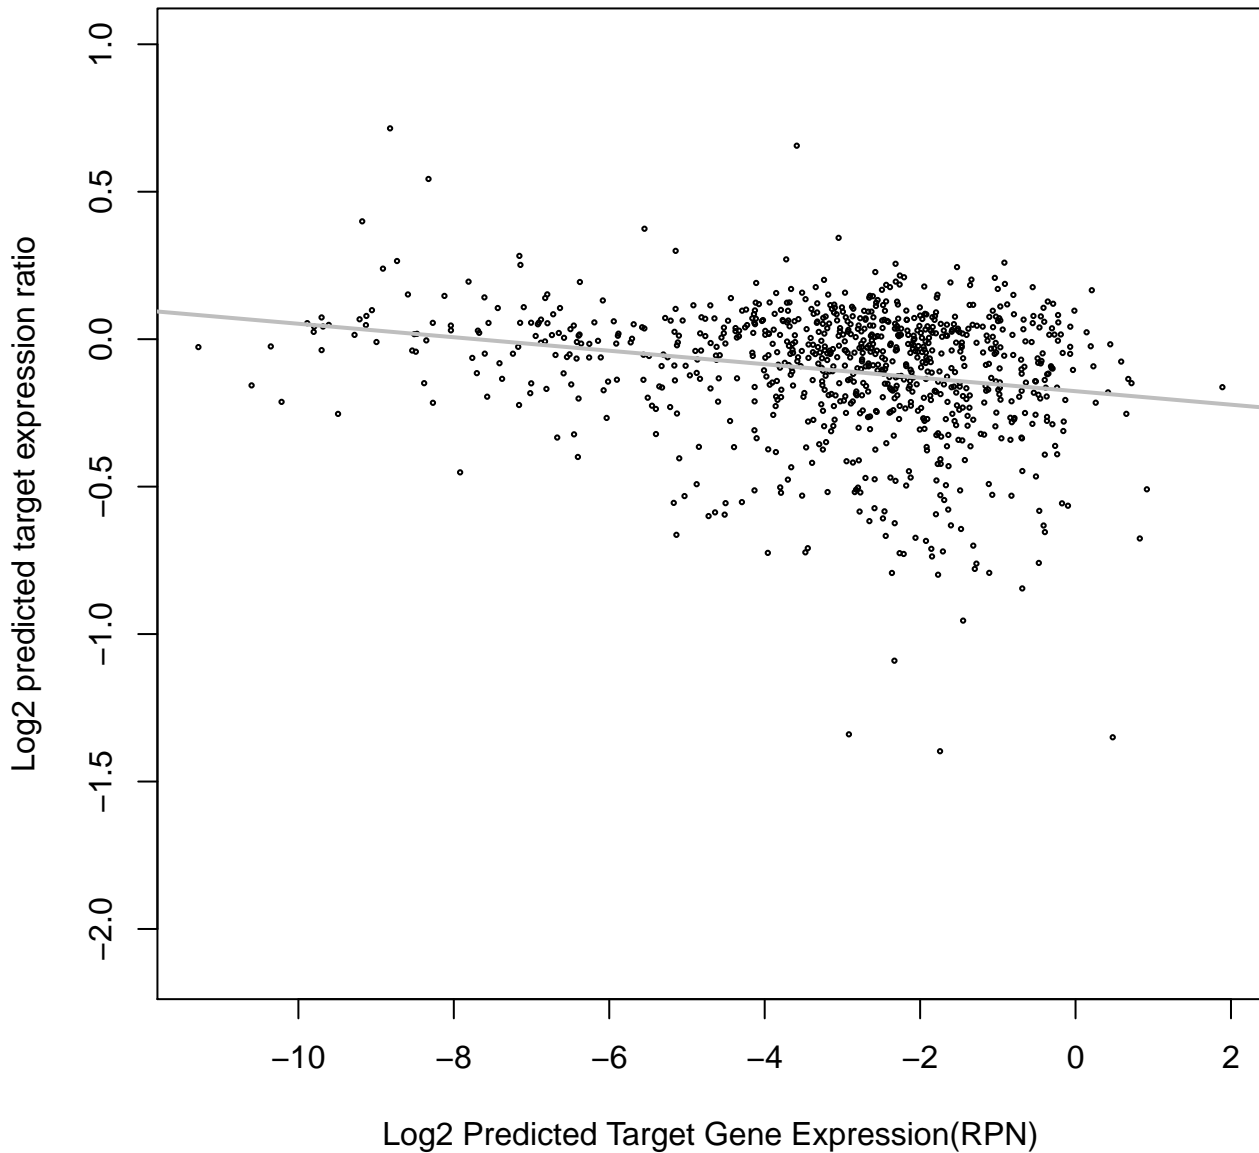

# grimson.24-15 - miR133a

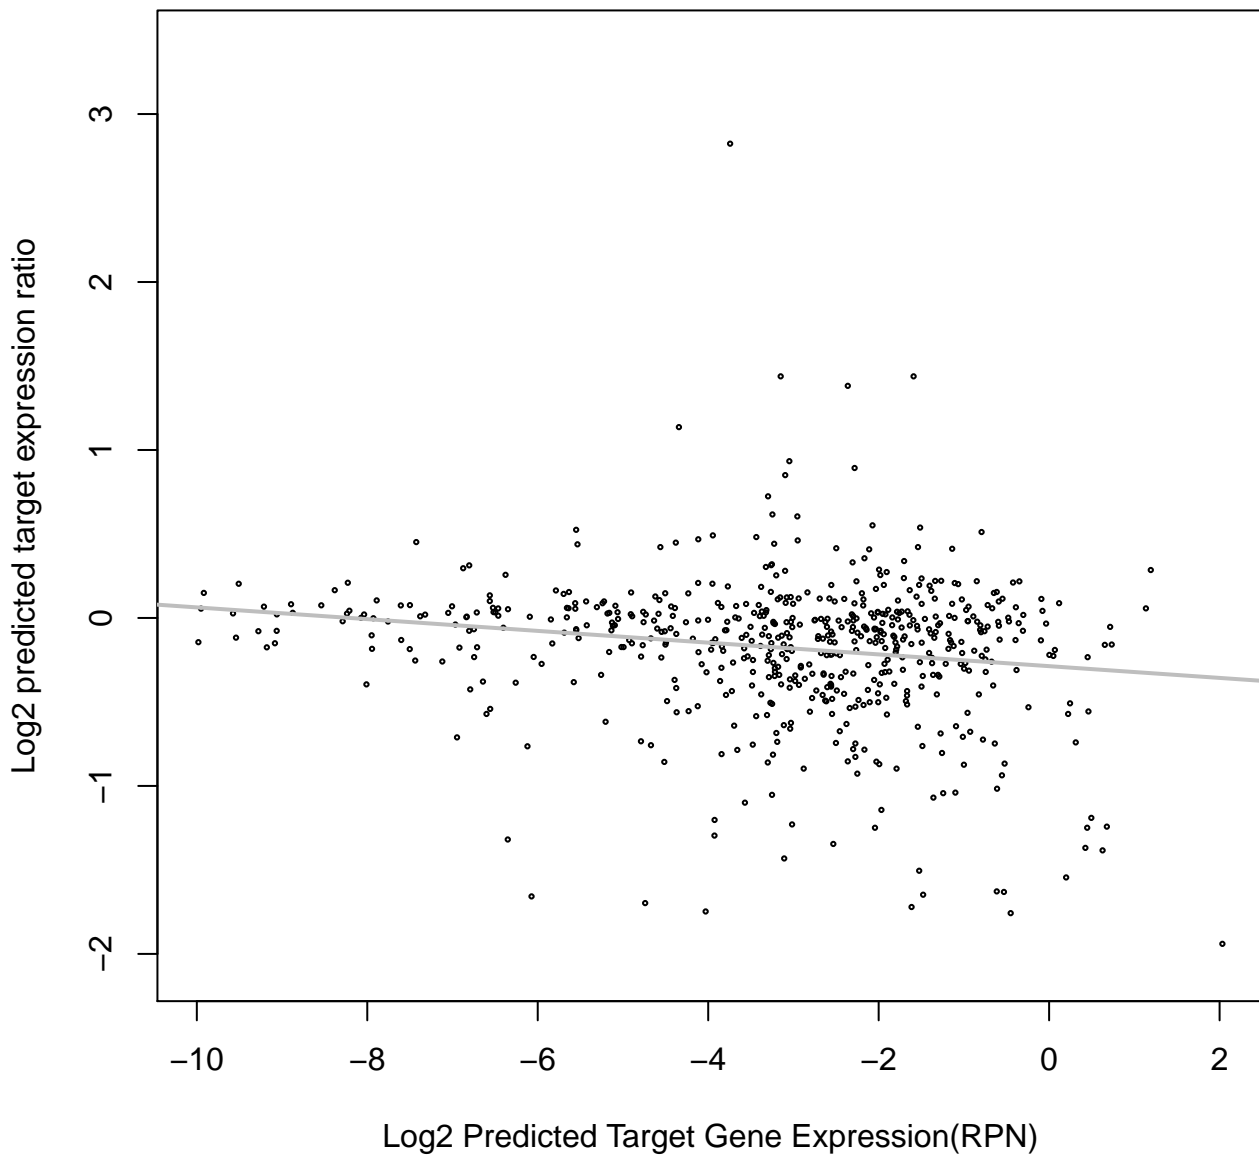

# grimson.24-16 – miR142-3p

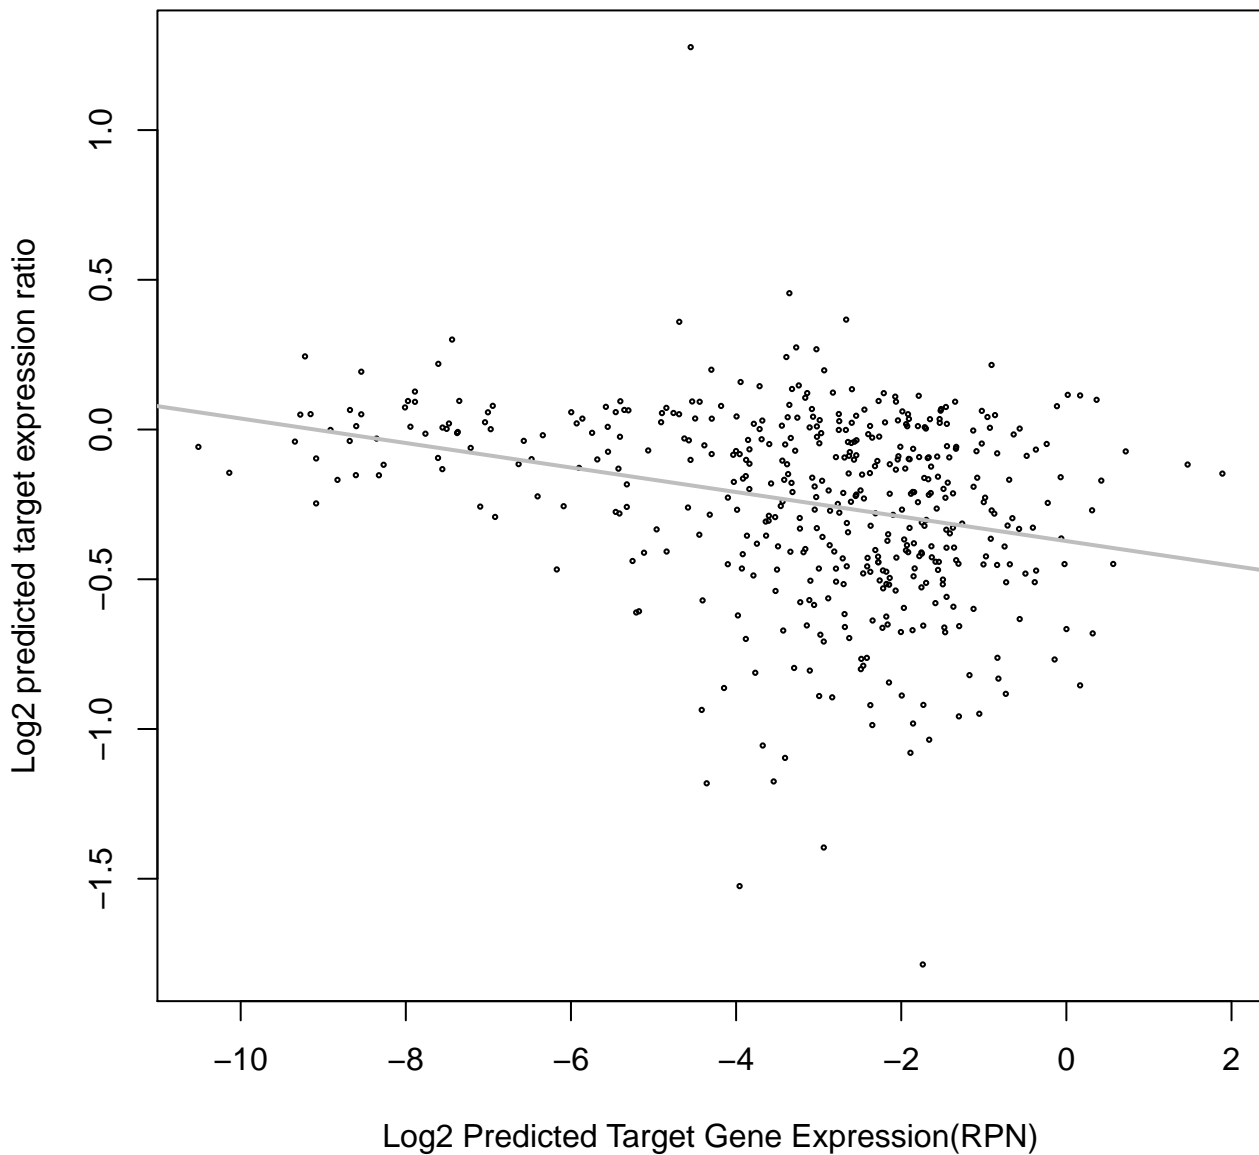

# grimson.24-17 - miR148b

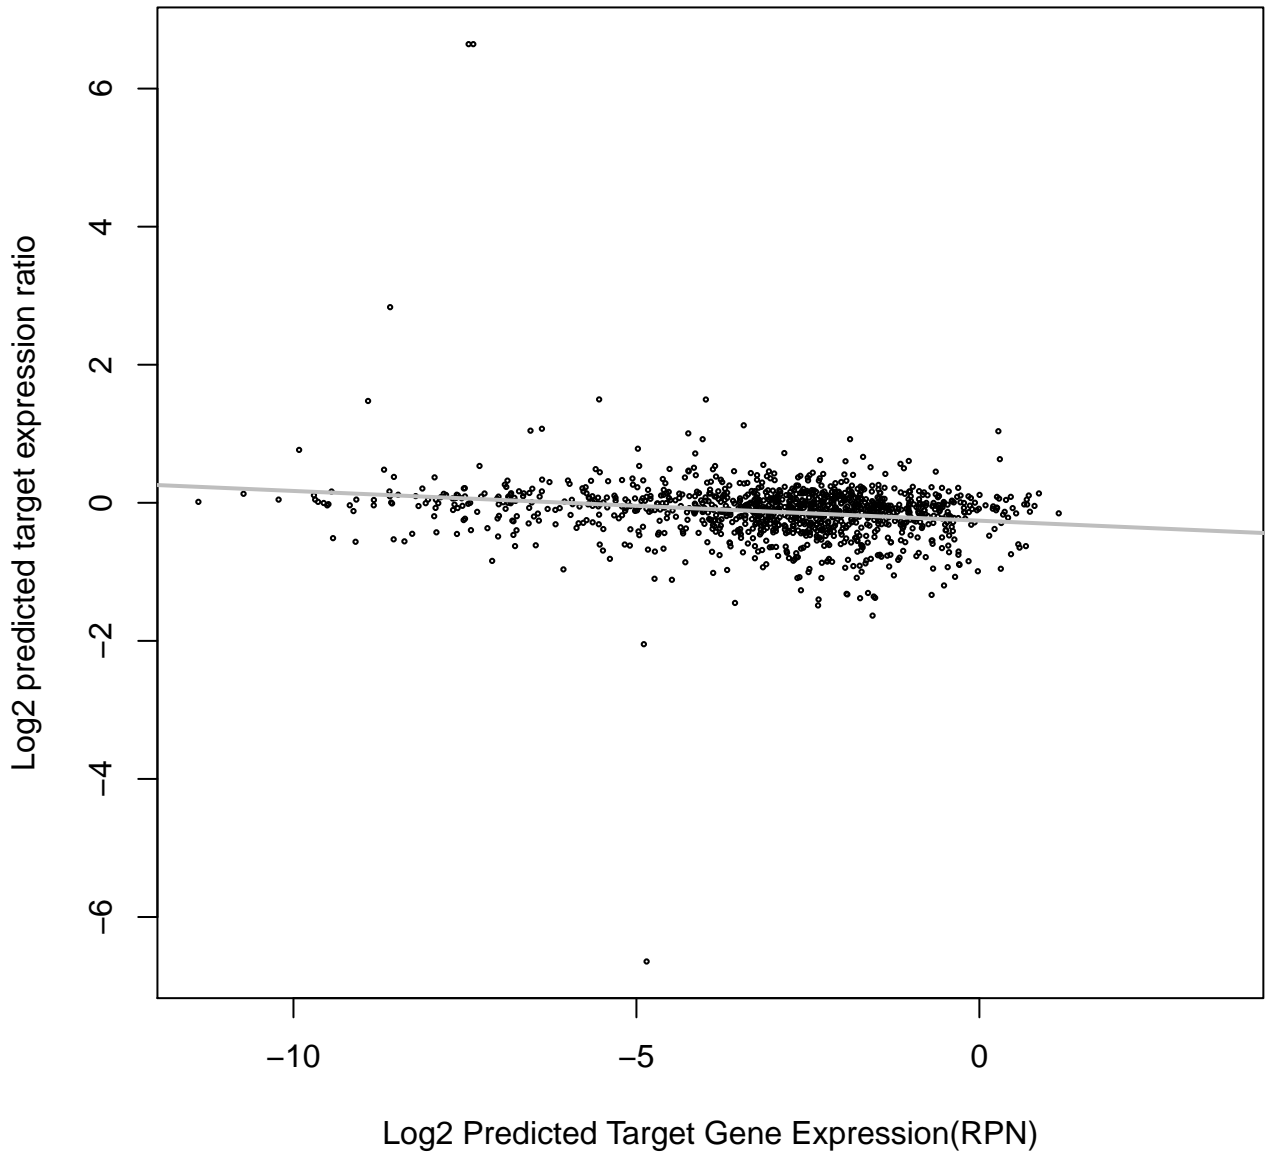

# grimson.24-18 - miR181a

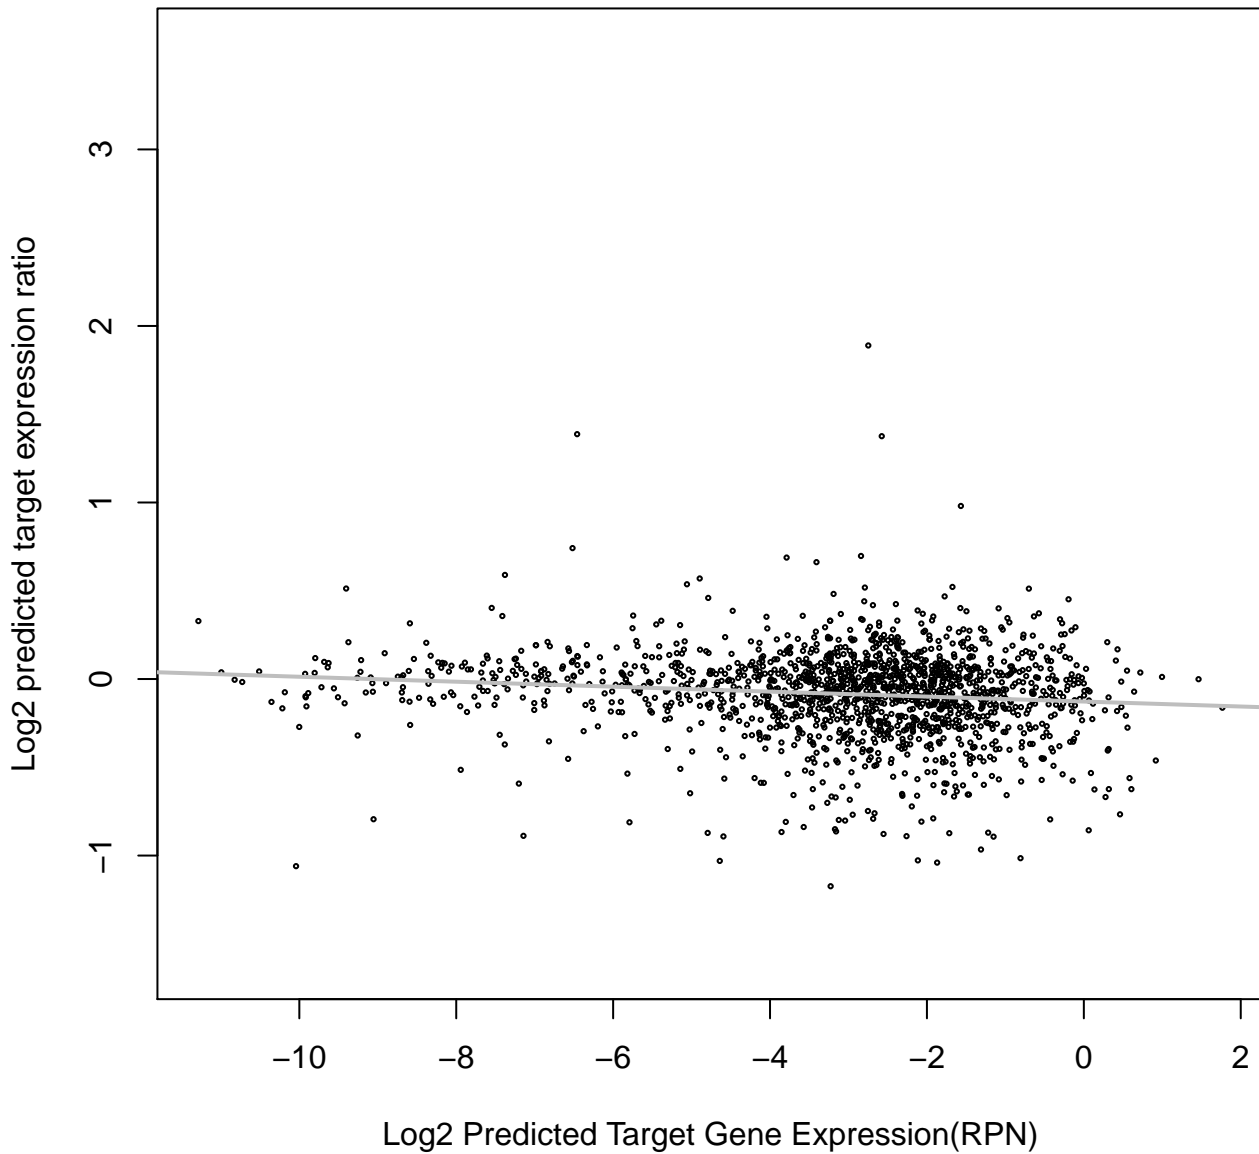

# he.hct-159 - miR34c

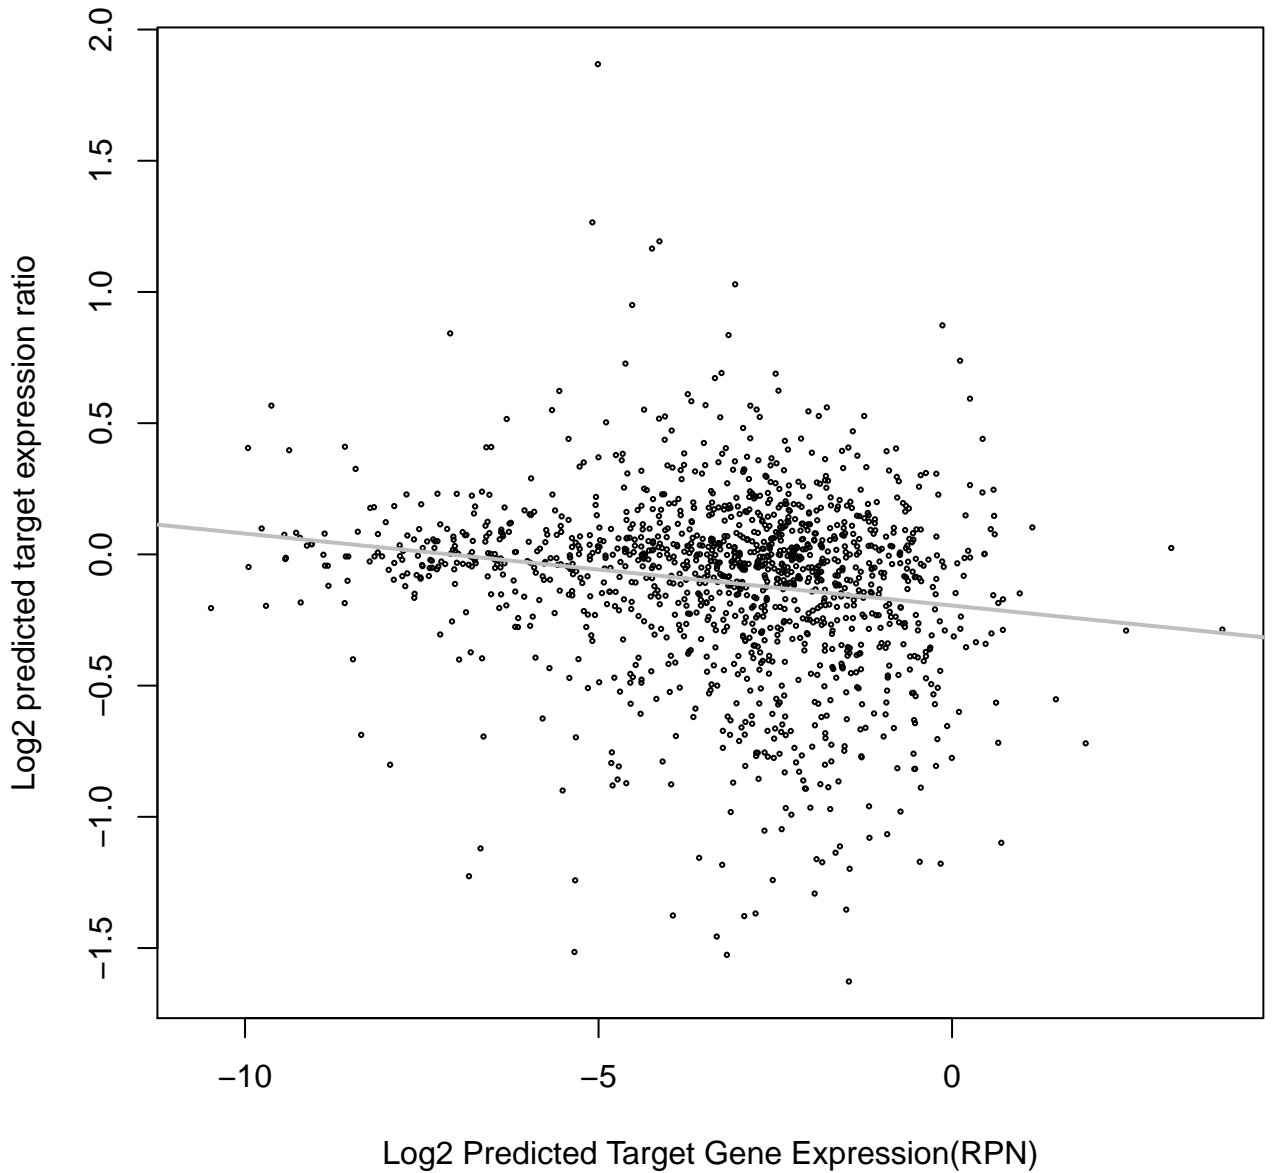

# he.hct-160 - miR34a

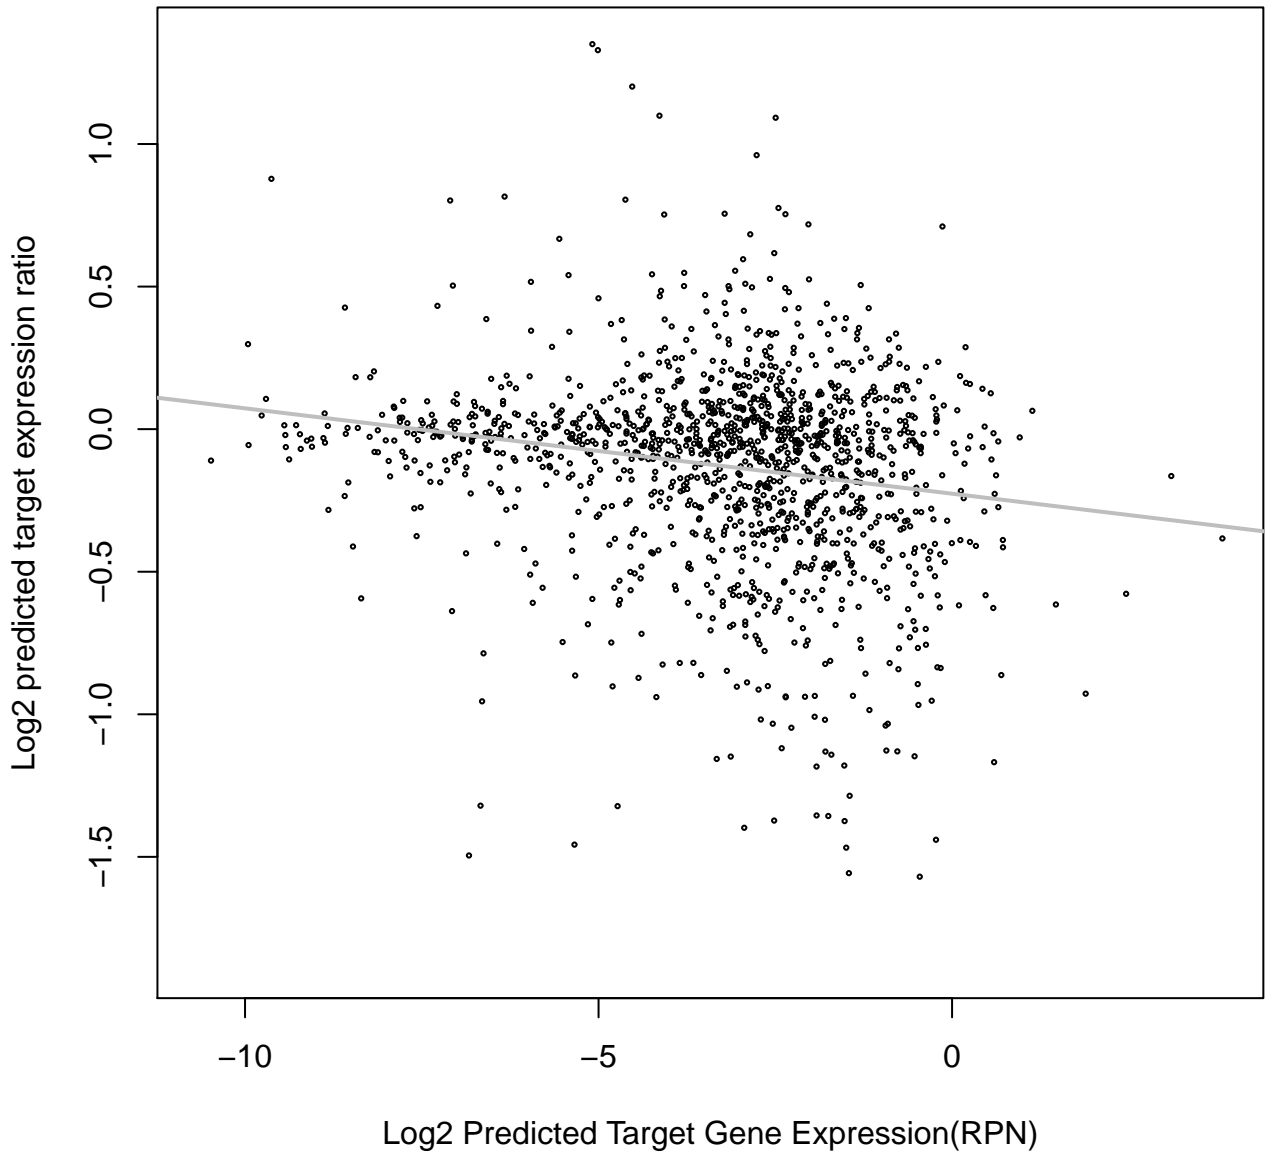



# he.hct-161 - miR34b

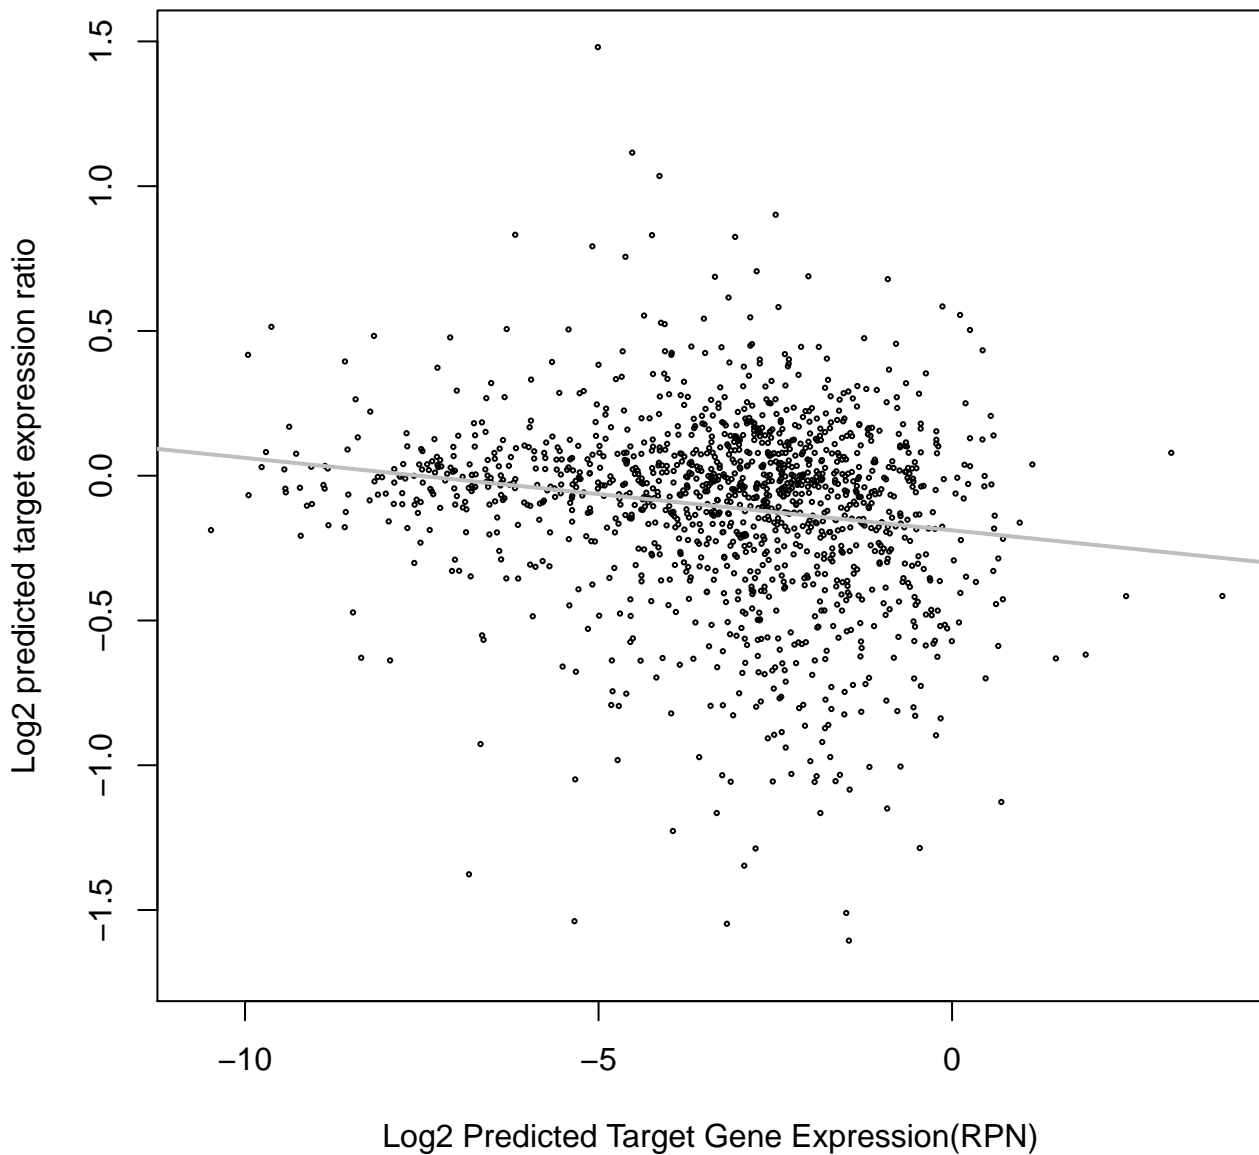

# he-156 - miR34a

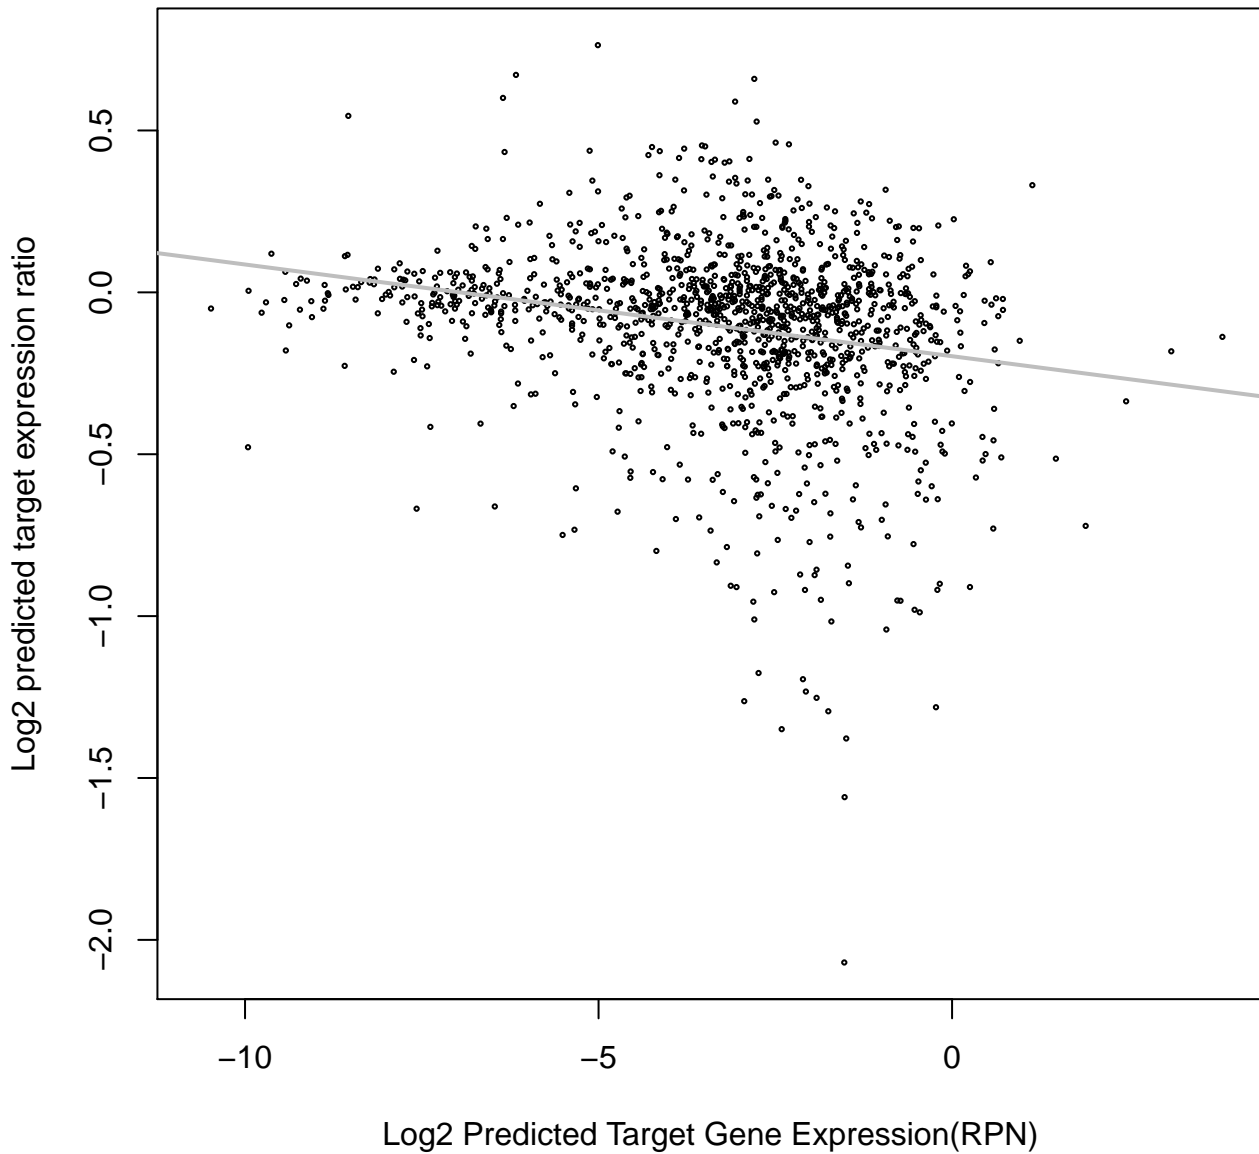

# he-157 - miR34b

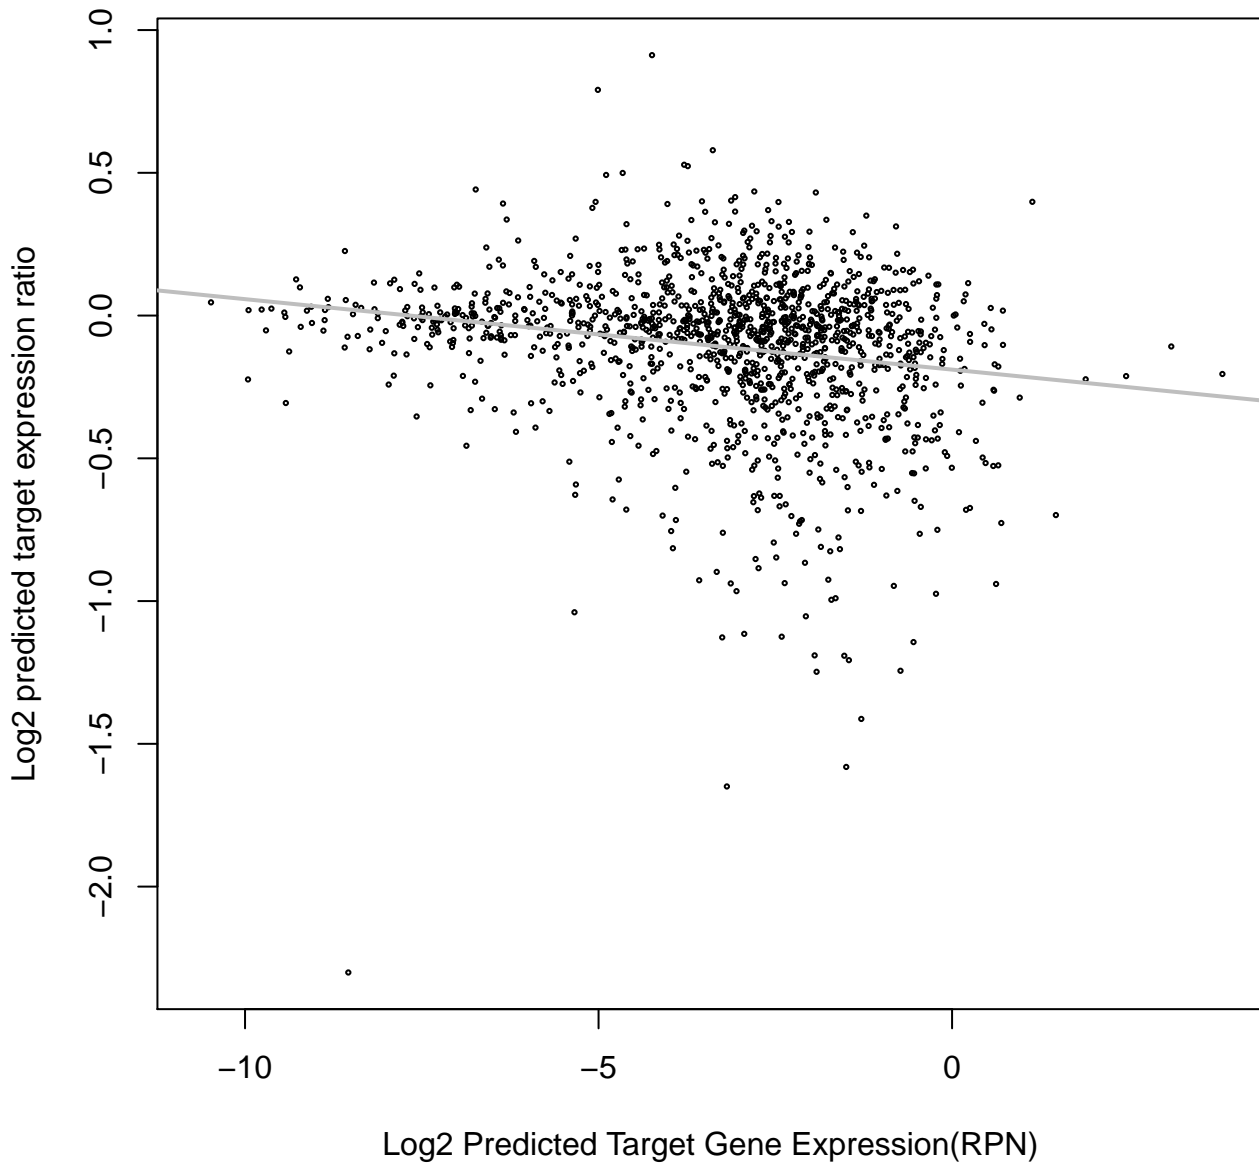

# he-158 - miR34c

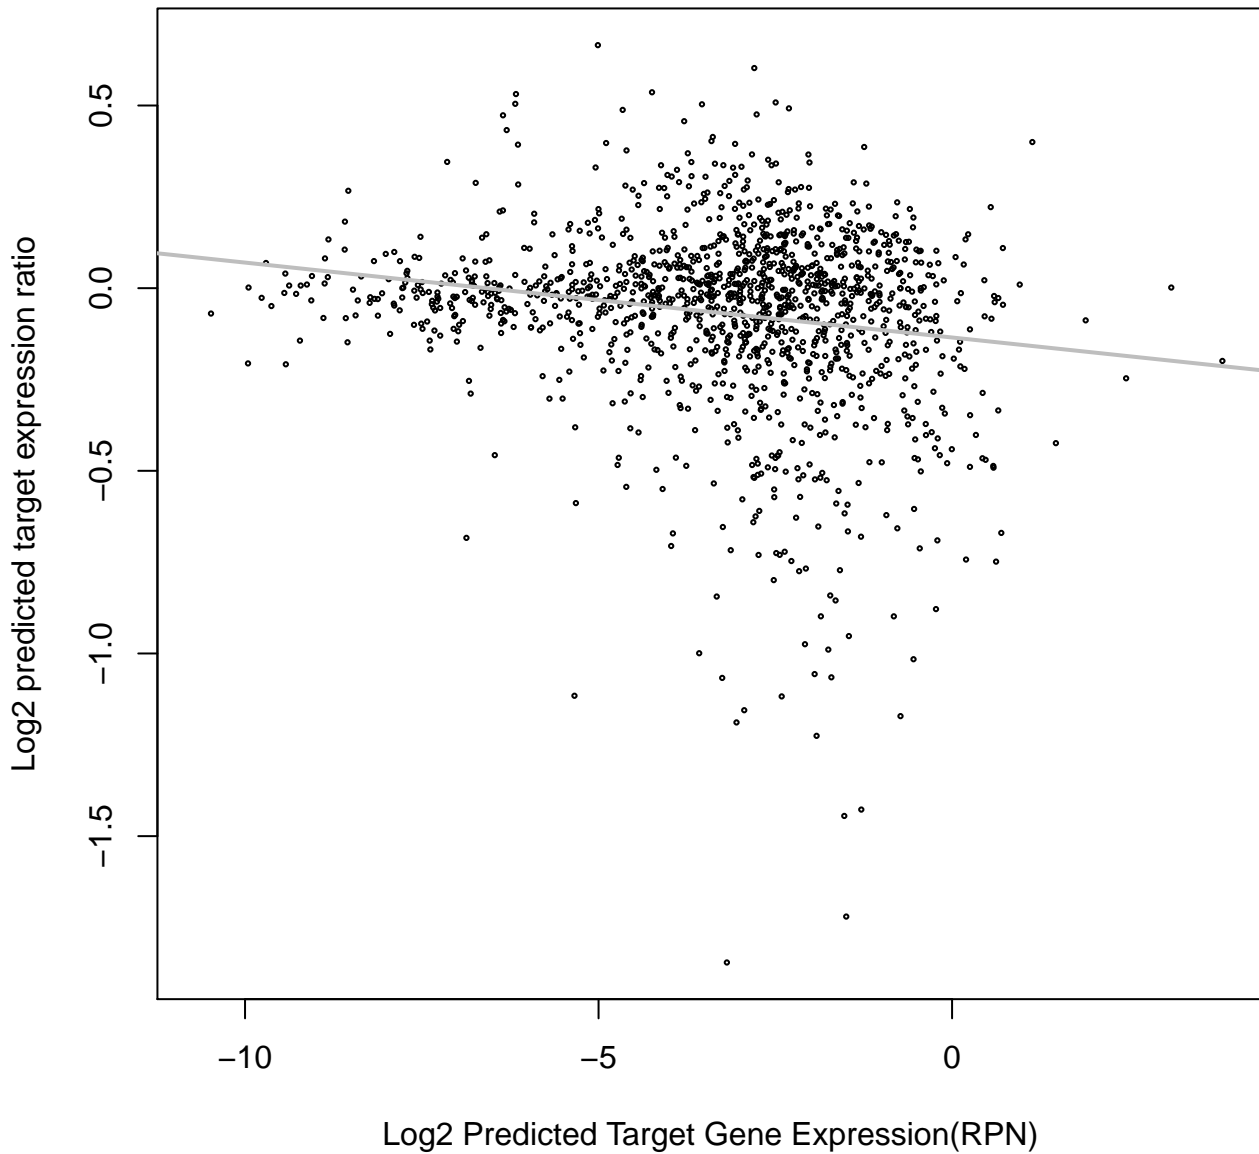

# jackson-29 – siMAPK14-193

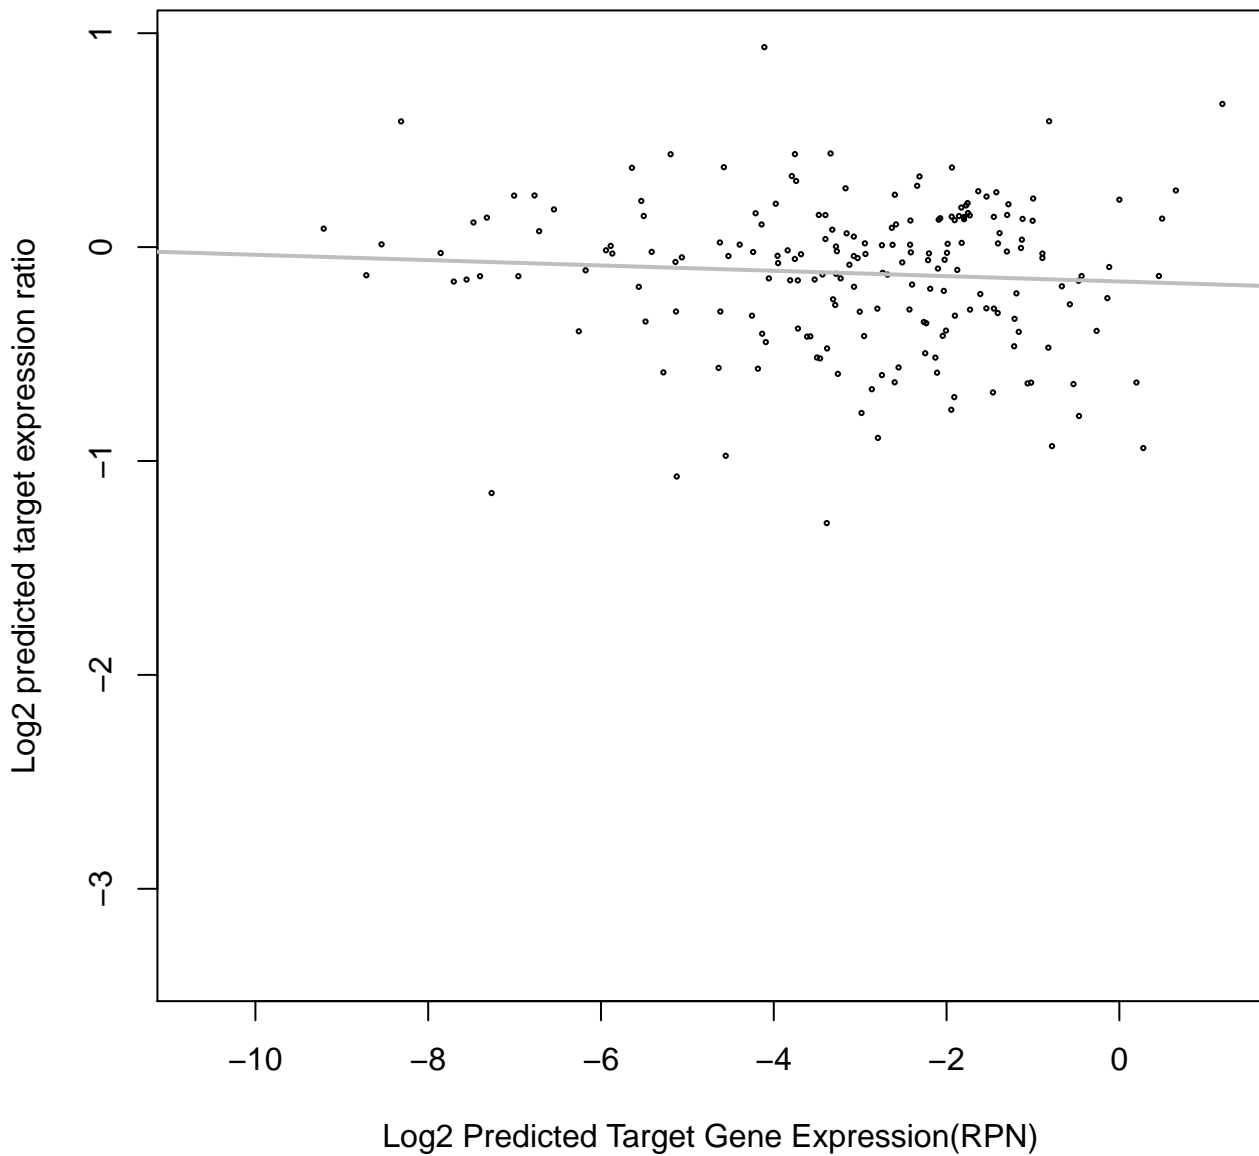

# jackson-30 - siMAPK14-193-mut19a

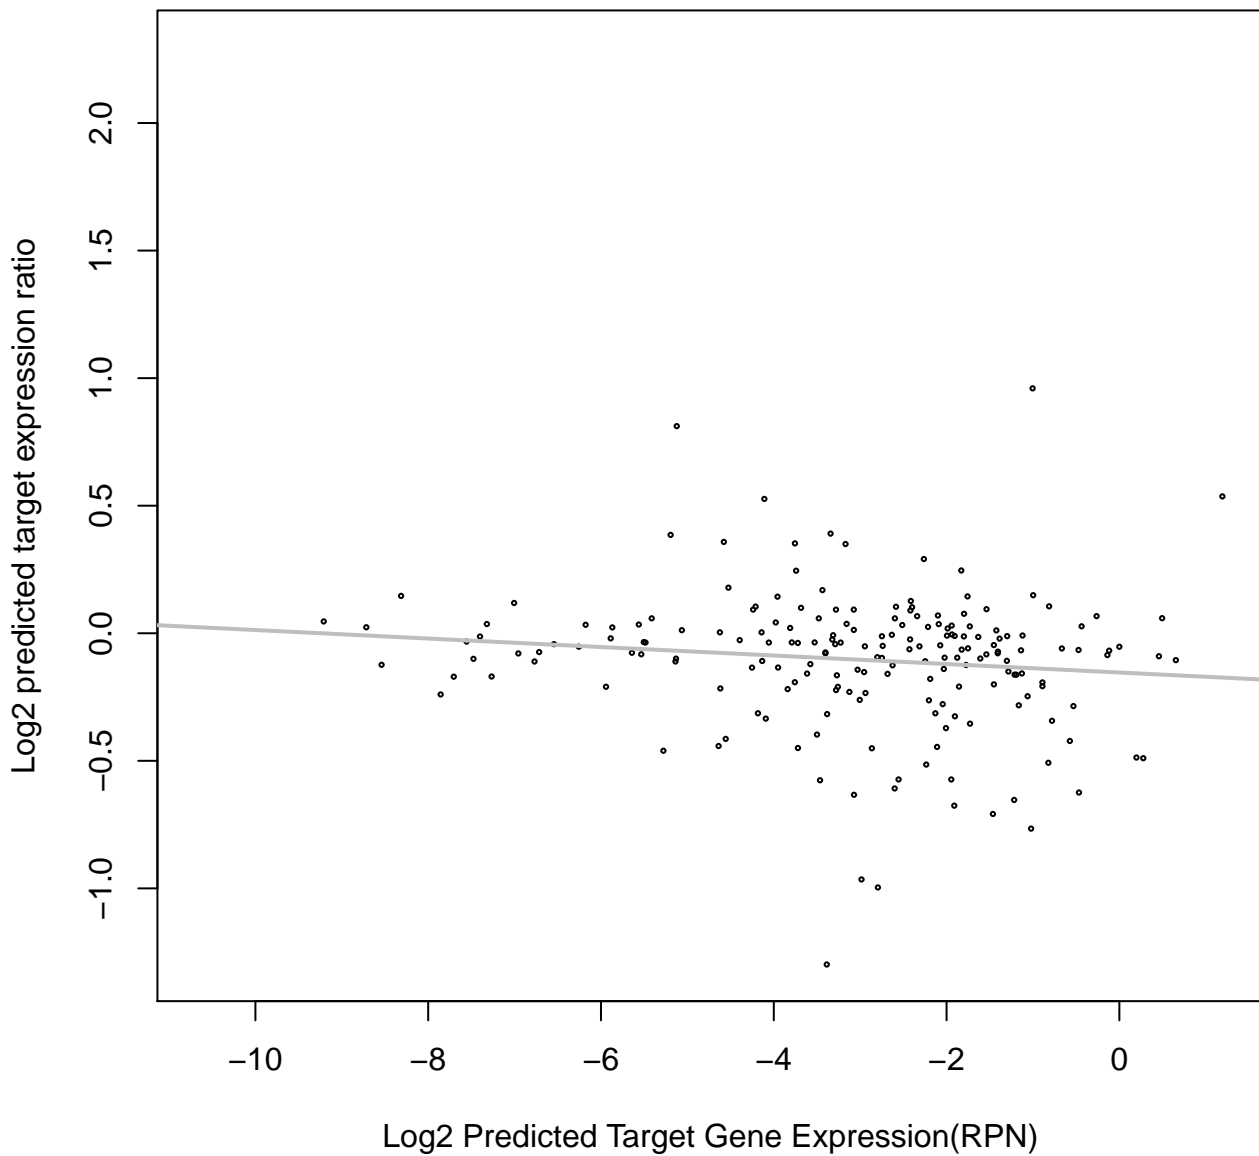

# jackson-31 - siMAPK14-193-mut18a

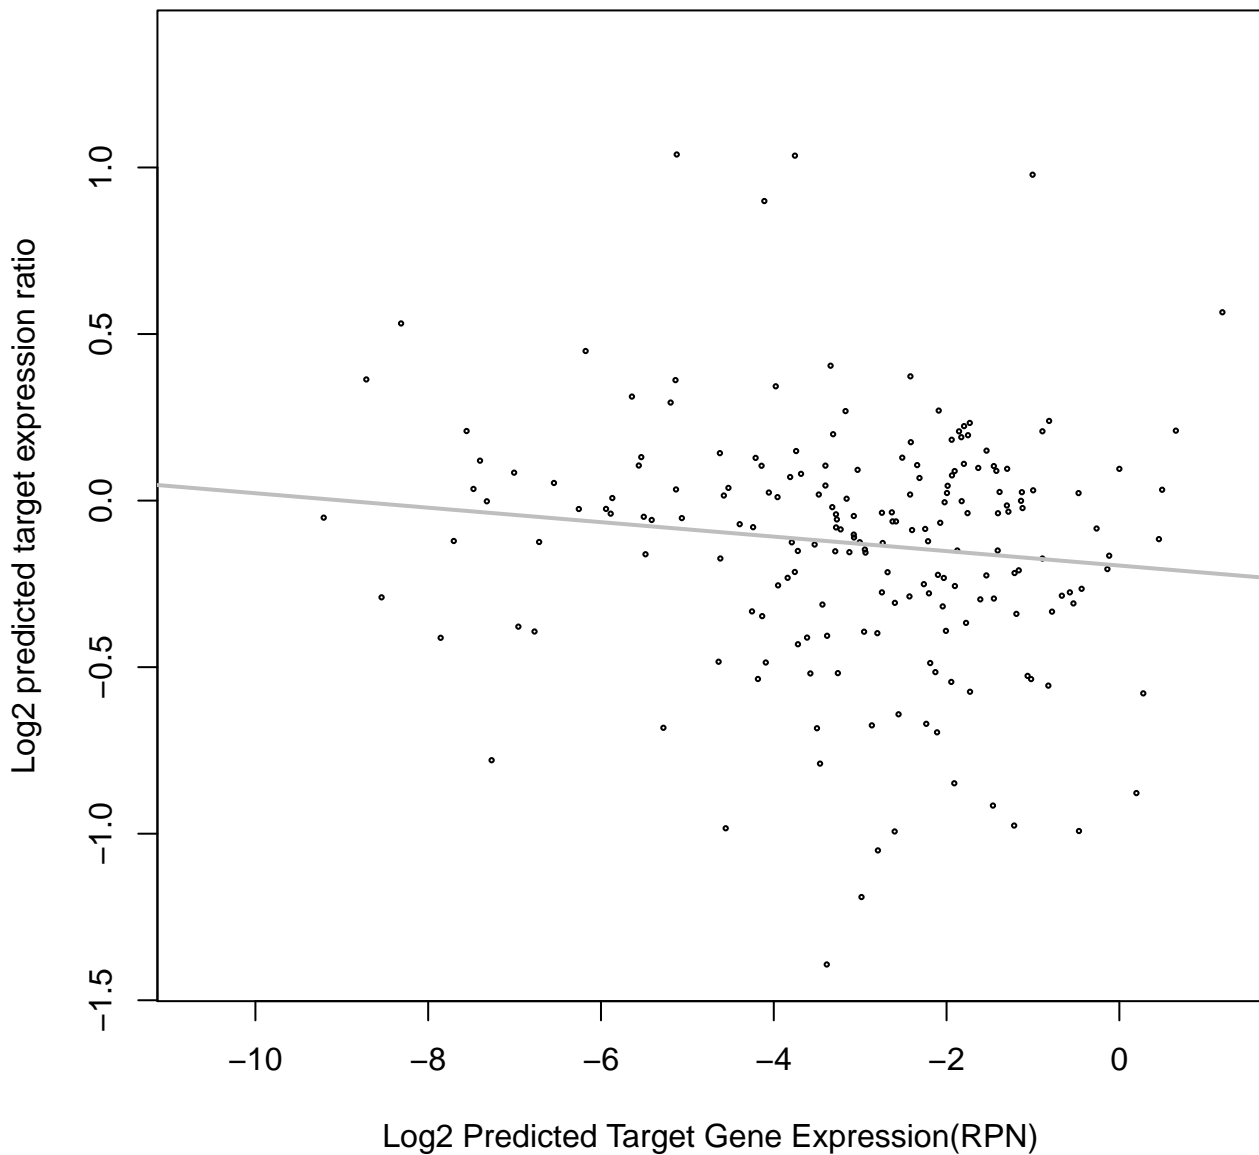

# jackson-32 - siMAPK14-193-mut17a

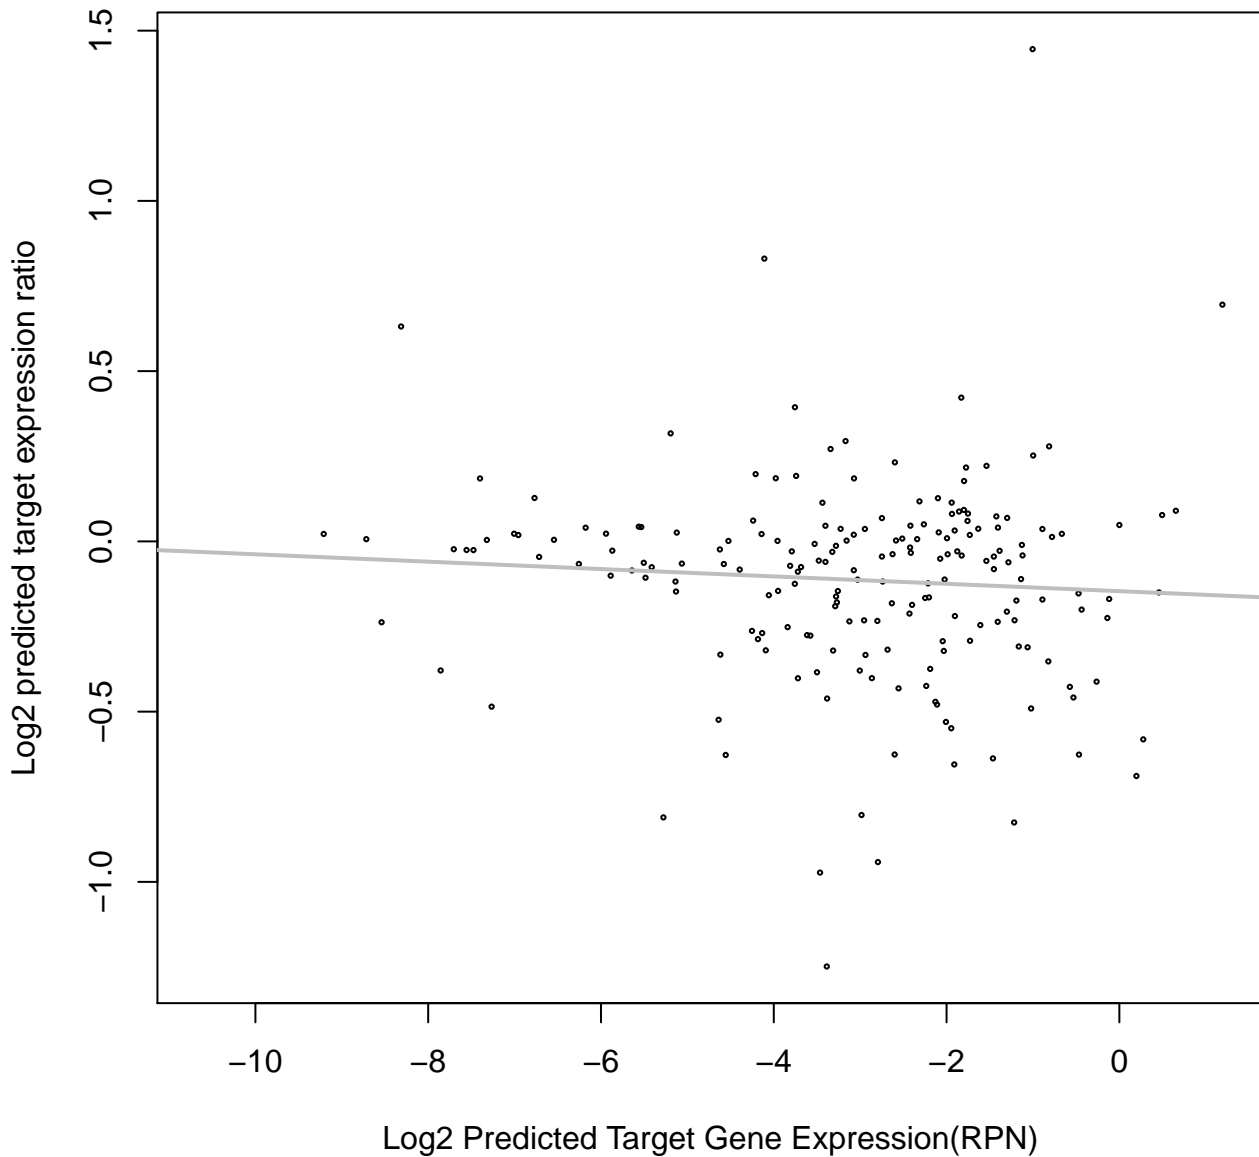



# jackson-33 - siMAPK14-193-mut16a

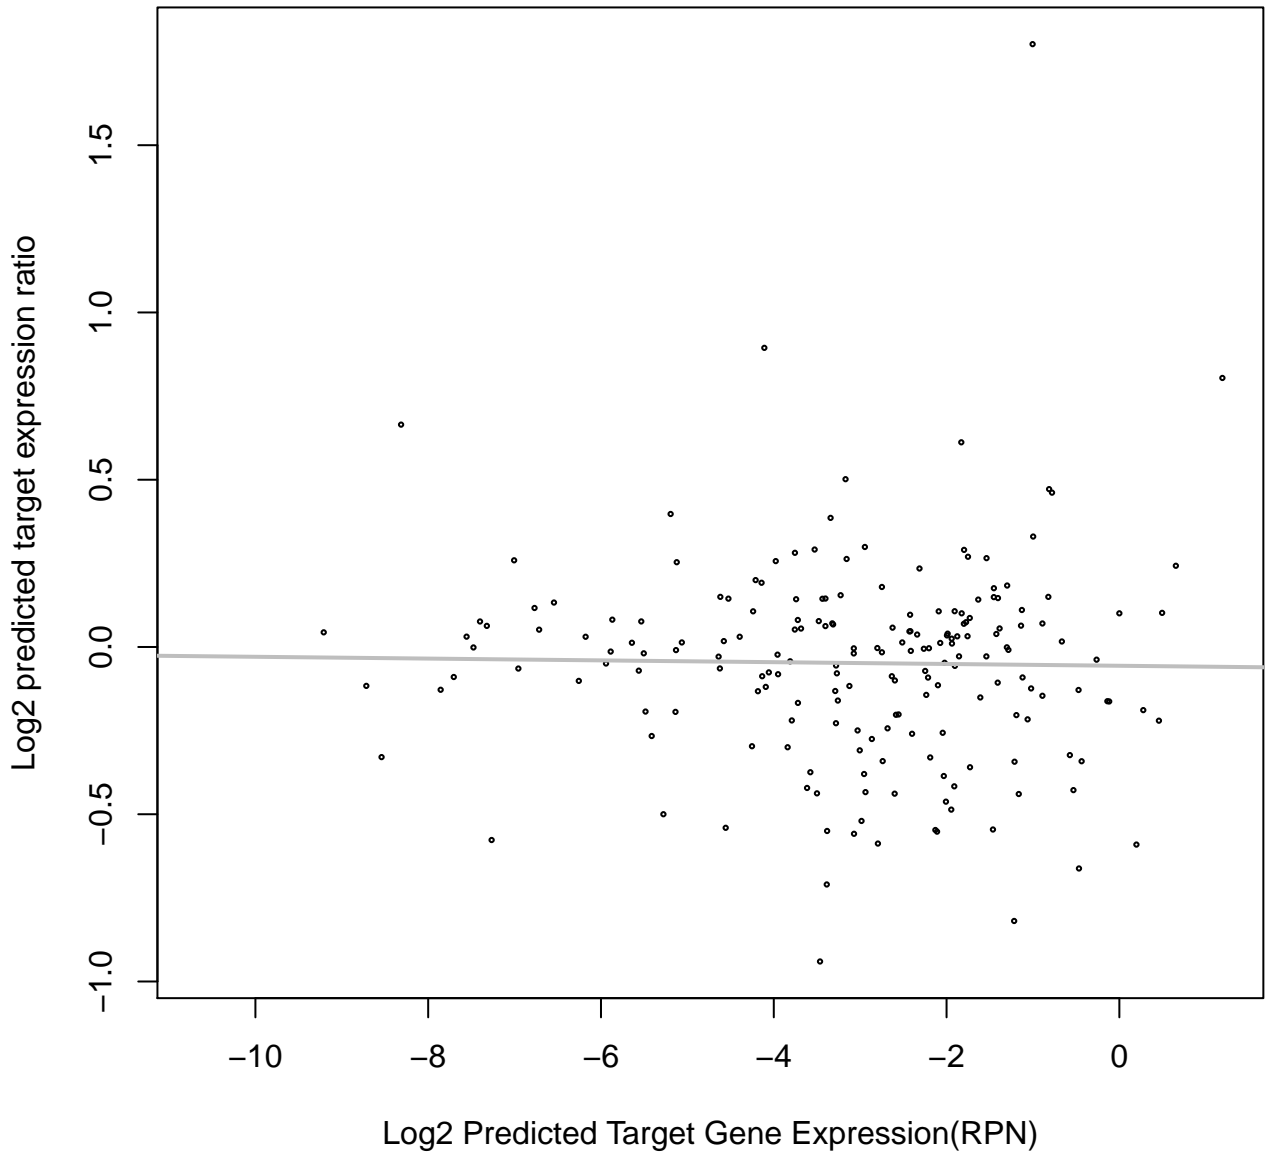

# jackson-34 - siMAPK14-193-mut15a

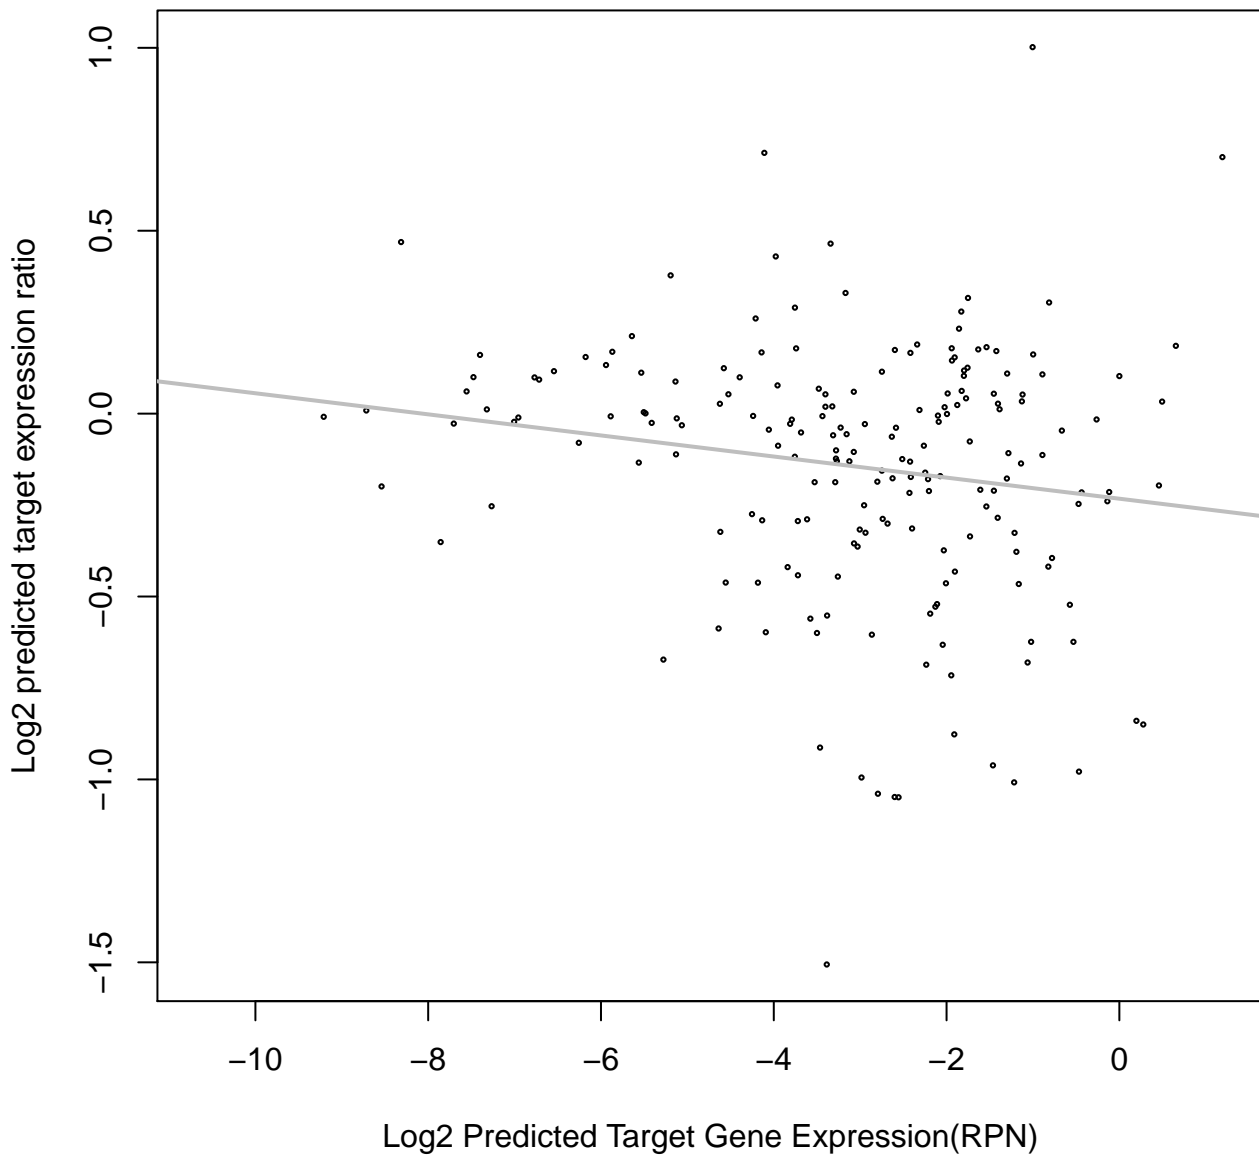

# jackson-35 - siMAPK14-193-mut14a

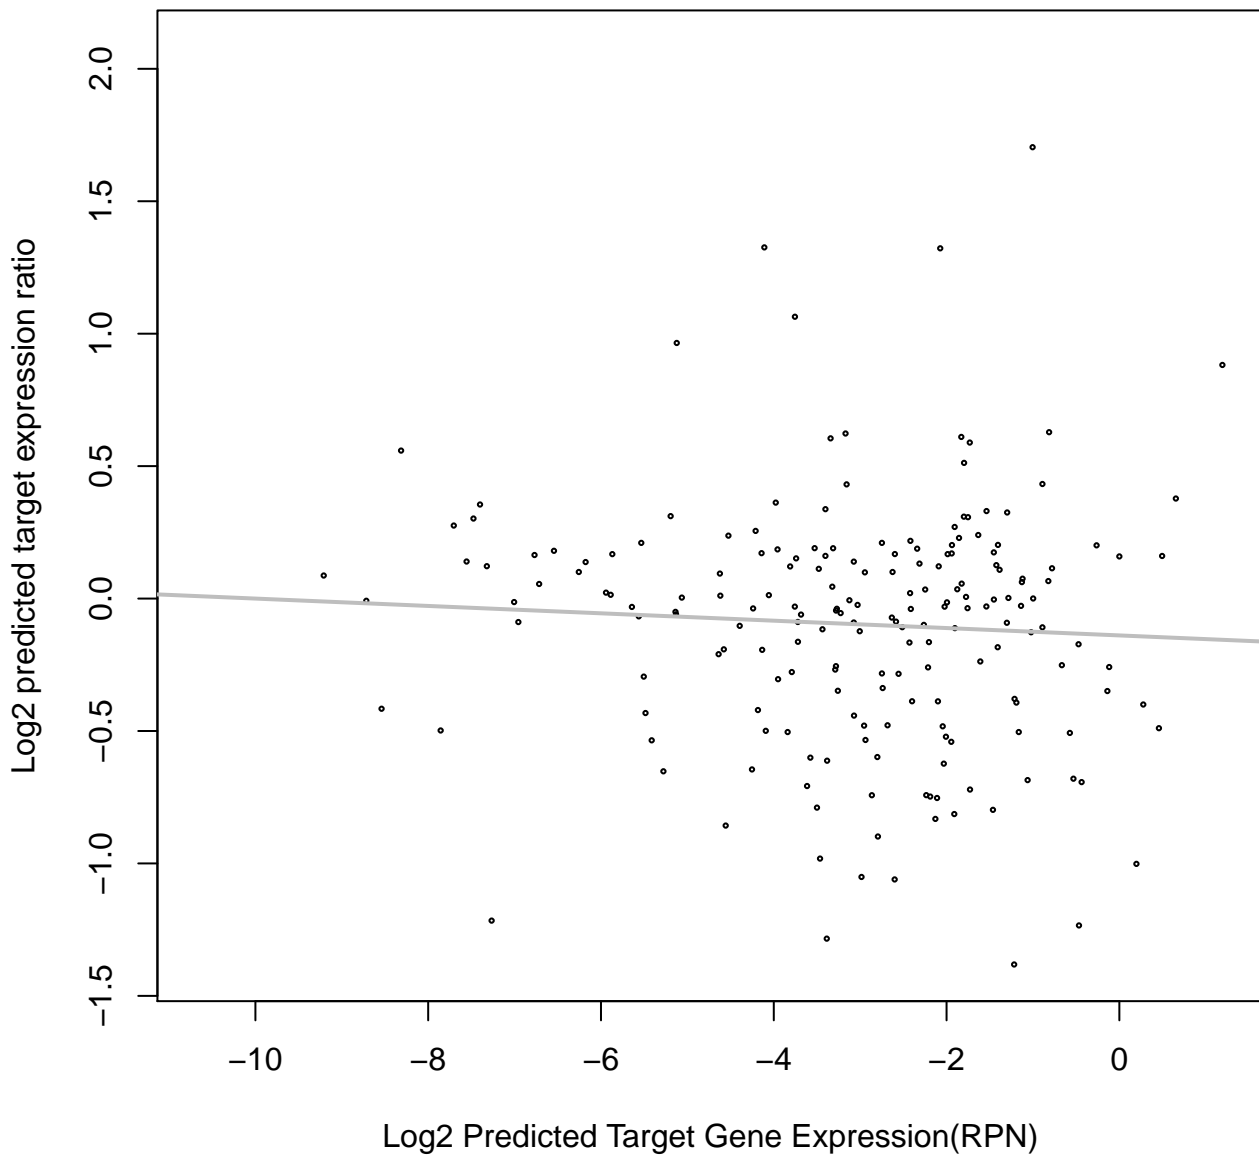

# jackson-36 - siMAPK14-193-mut13a

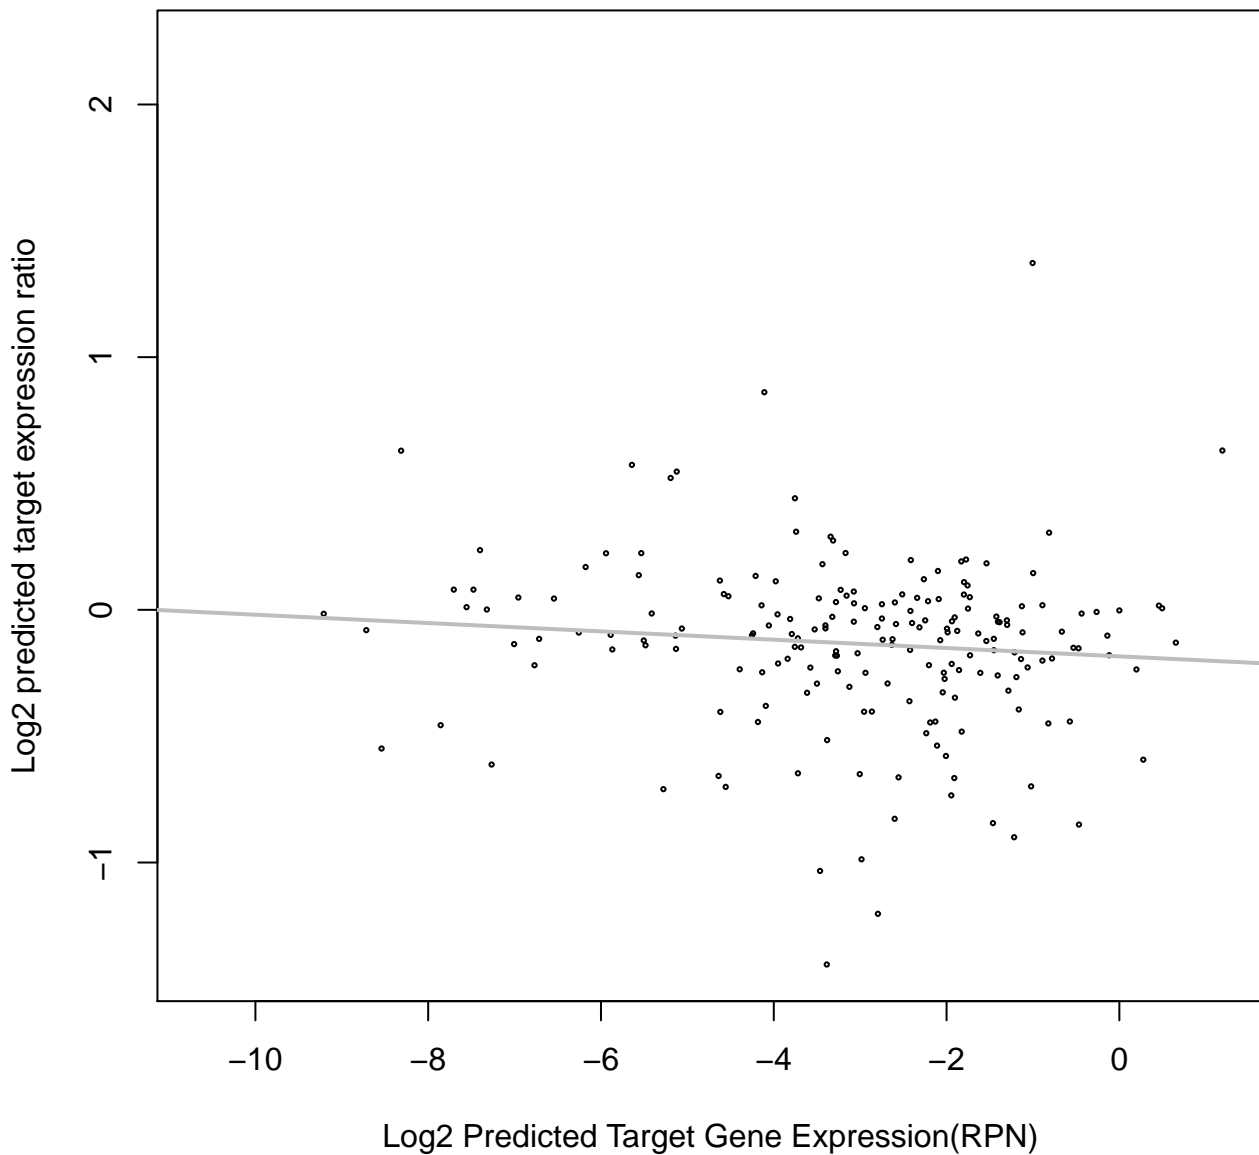

# jackson-37 - siMAPK14-193-mut12a

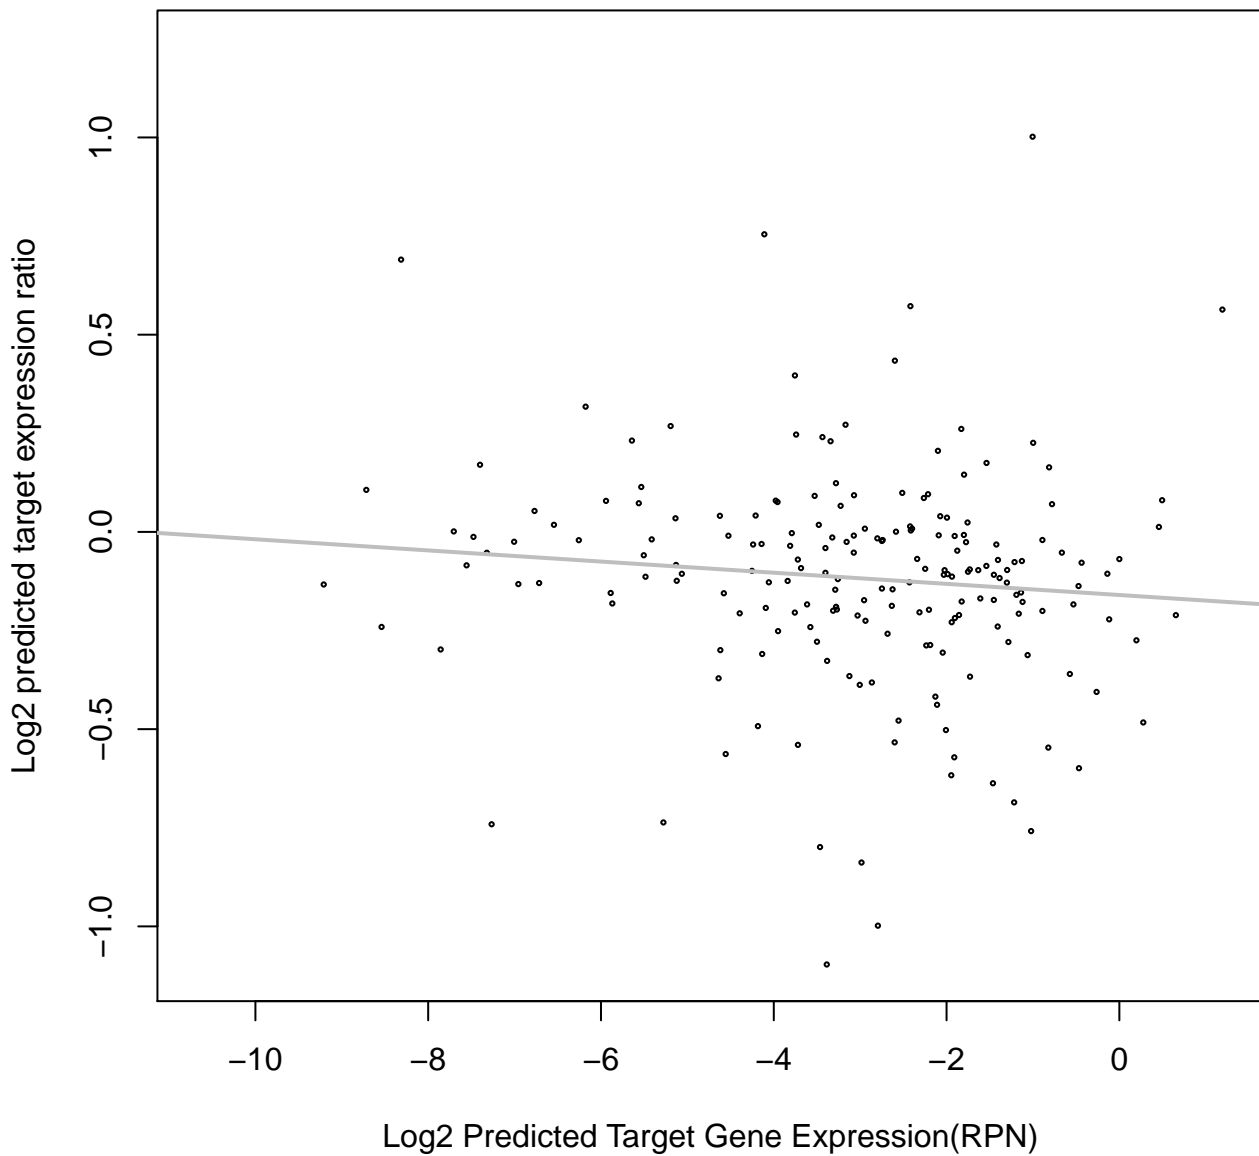

# jackson-38 - siMAPK14-193-mut11a

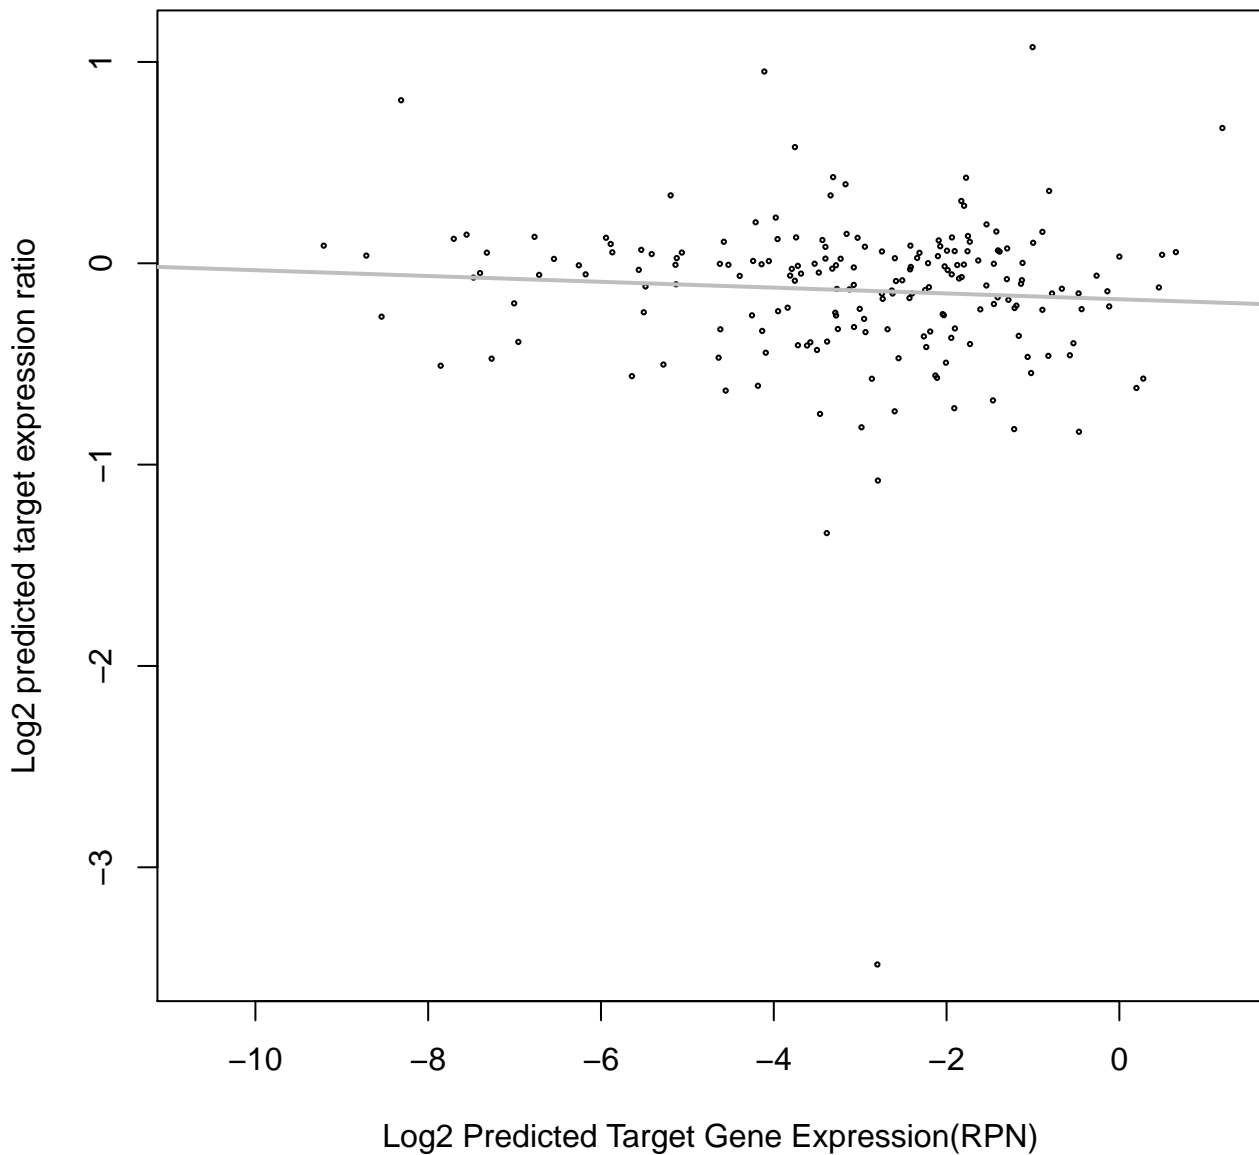

# jackson-39 – siMAPK14-193-mut10a

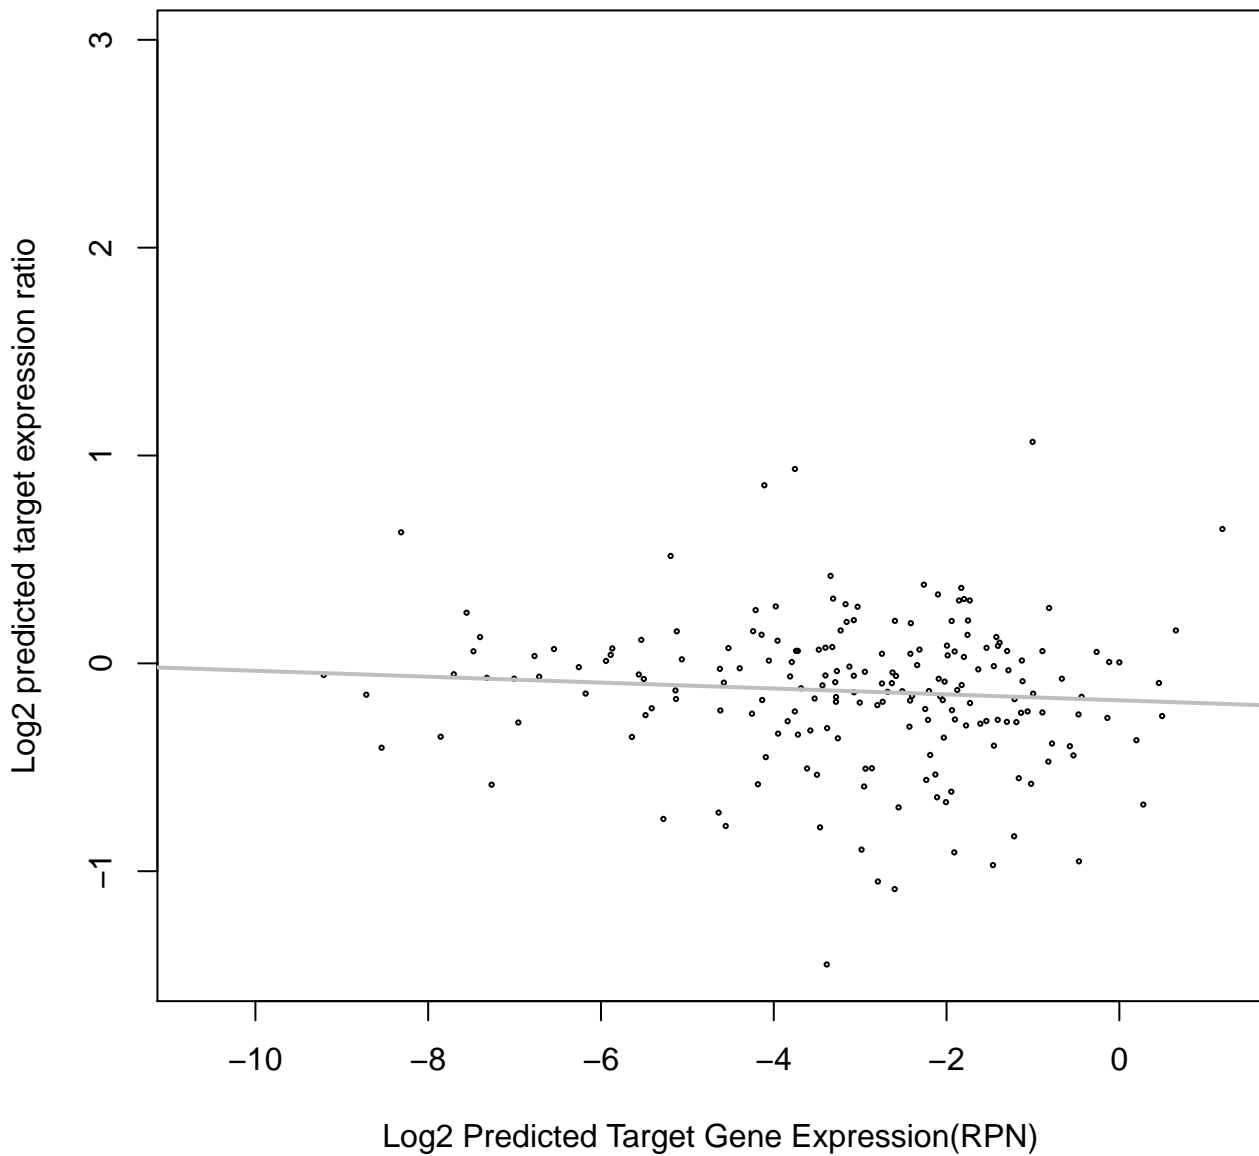

# jackson-40 - siMAPK14-193-mut9a

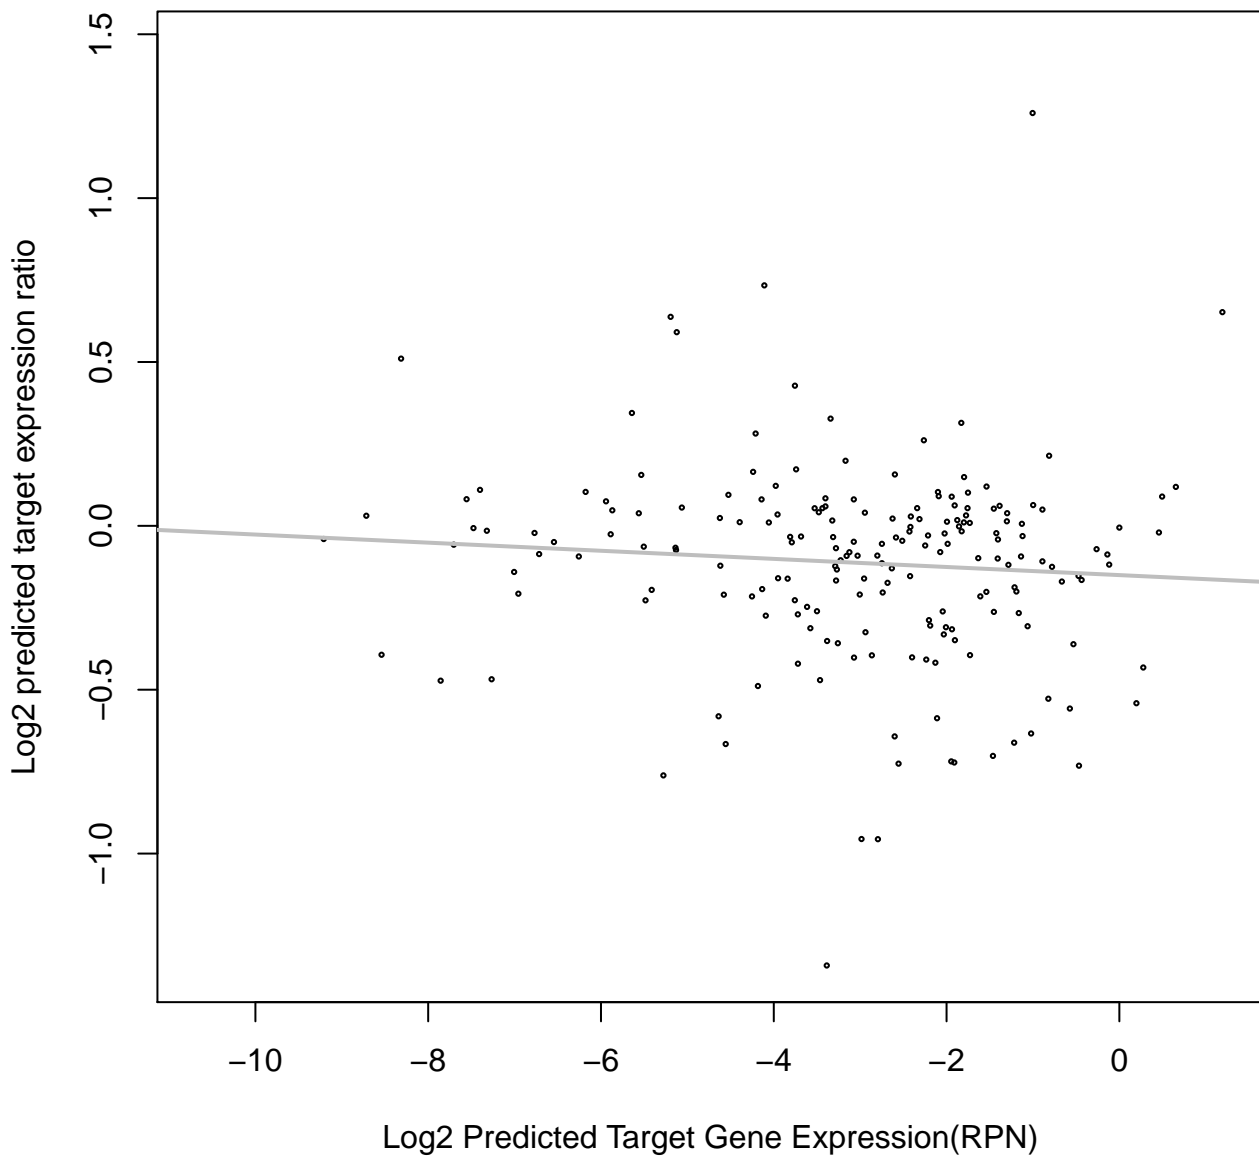



# jackson-41 - siMAPK14-193-mut8a

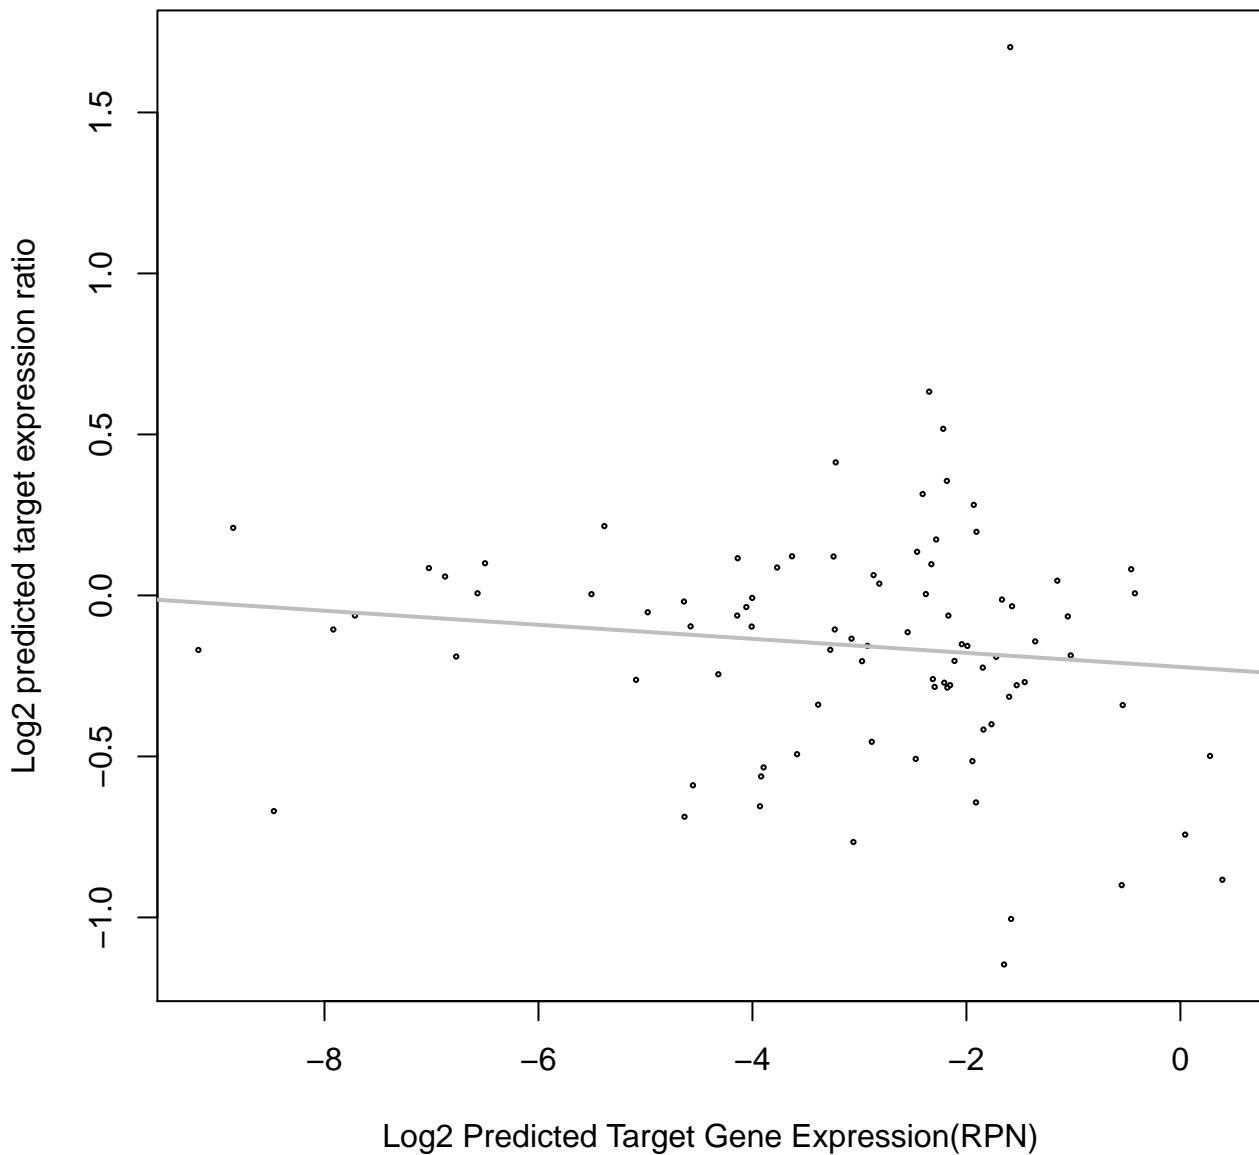

# jackson-42 - siMAPK14-193-mut7a

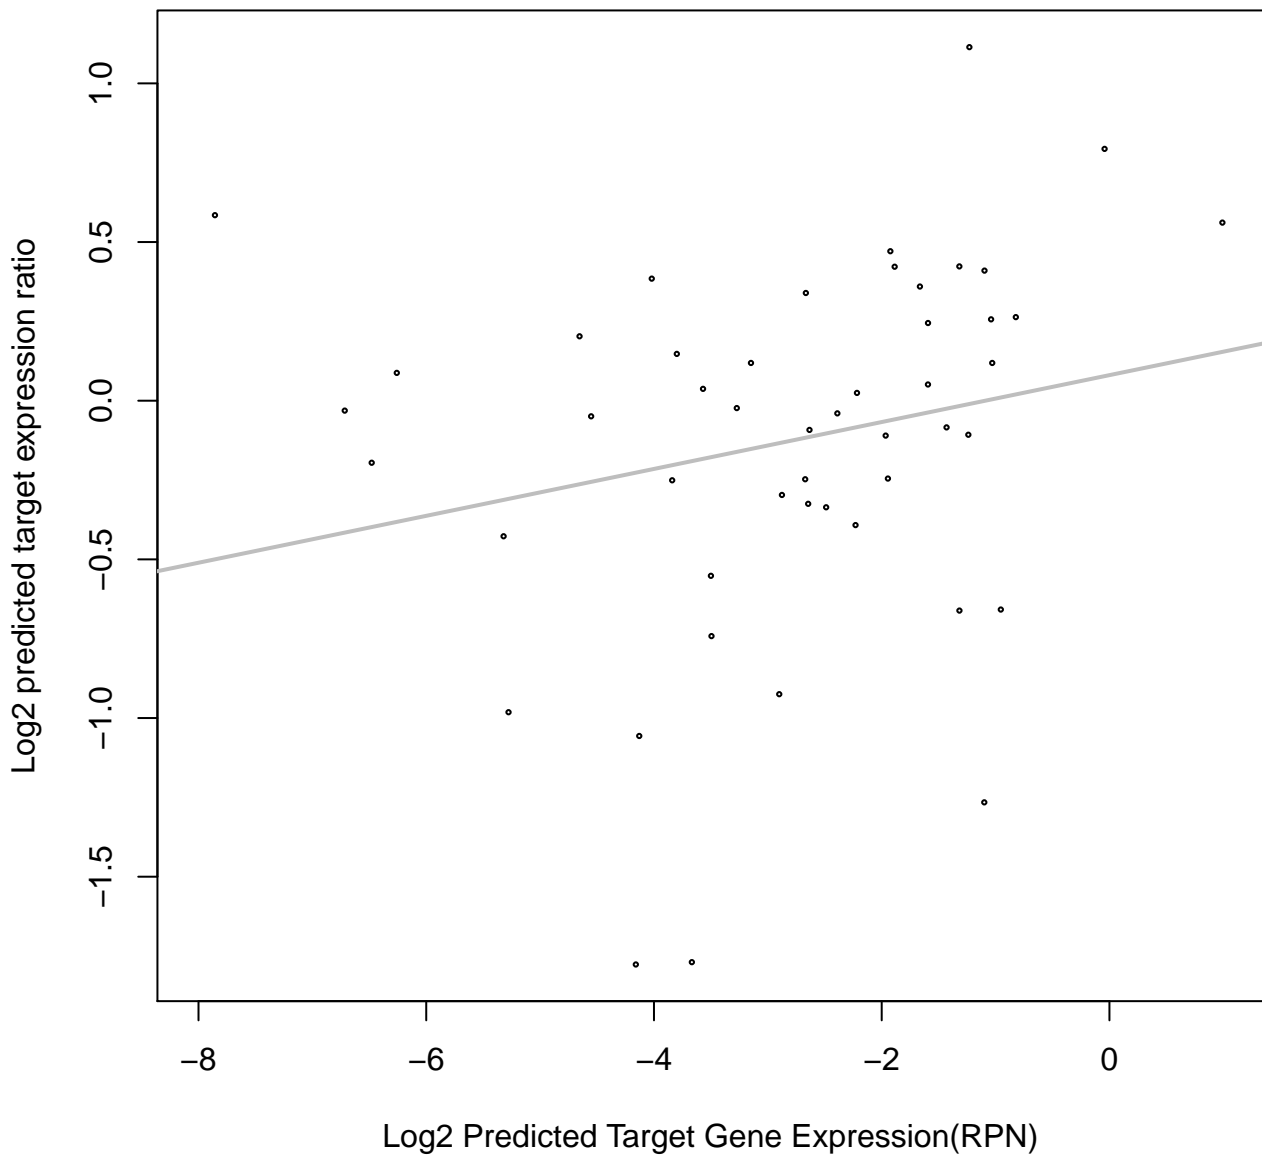

# jackson-43 - siMAPK14-193-mut6a

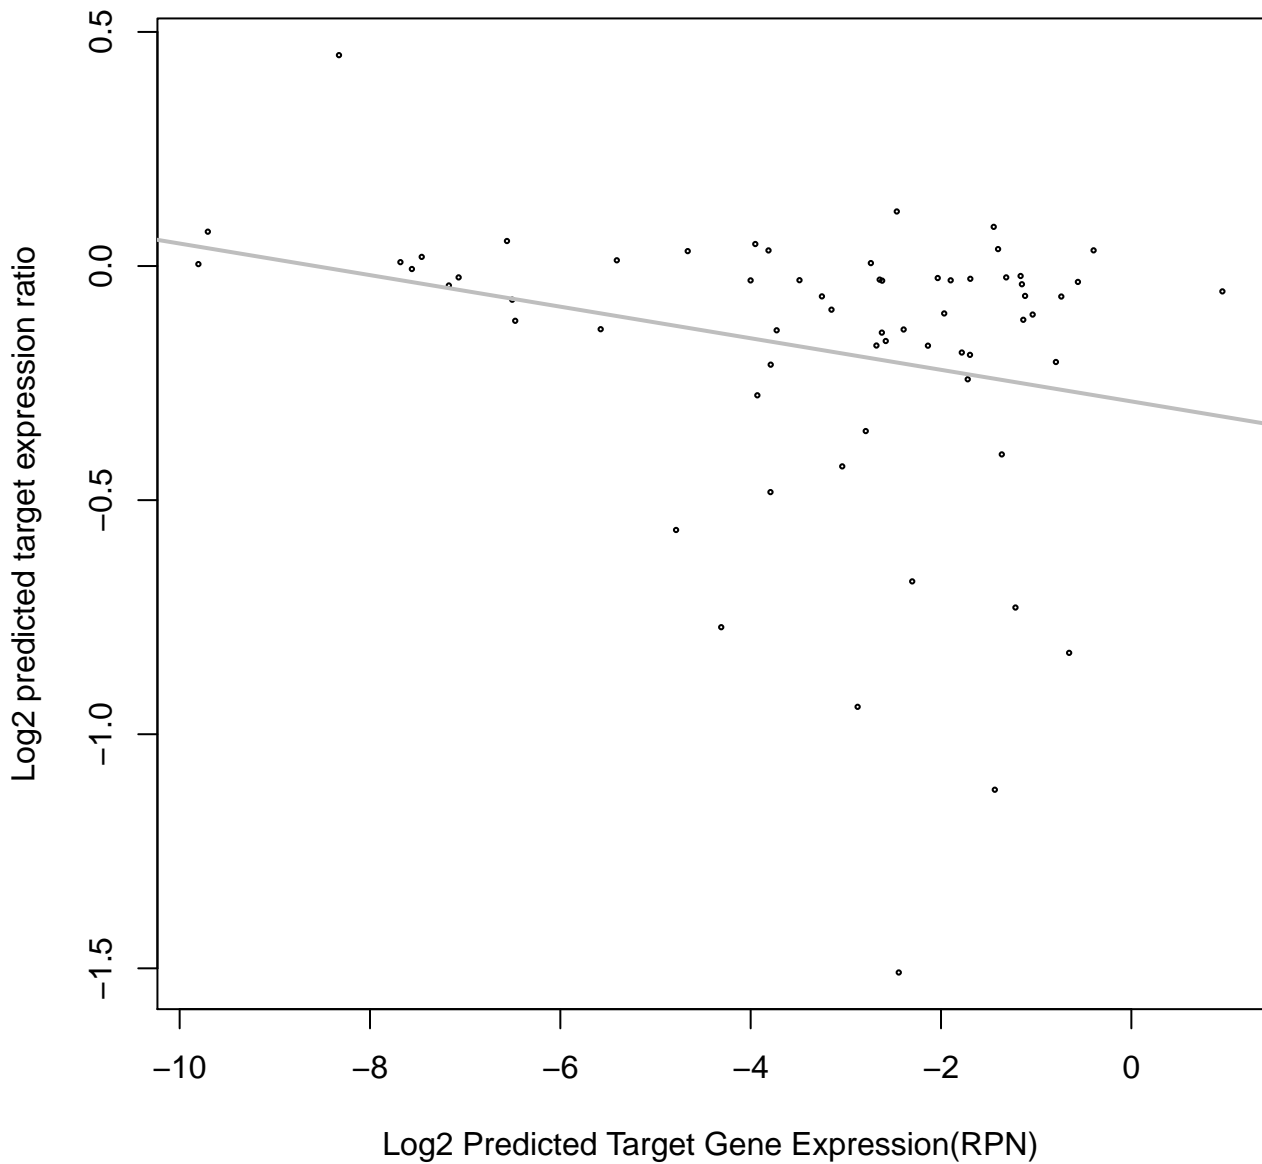

# jackson-44 - siMAPK14-193-mut5a

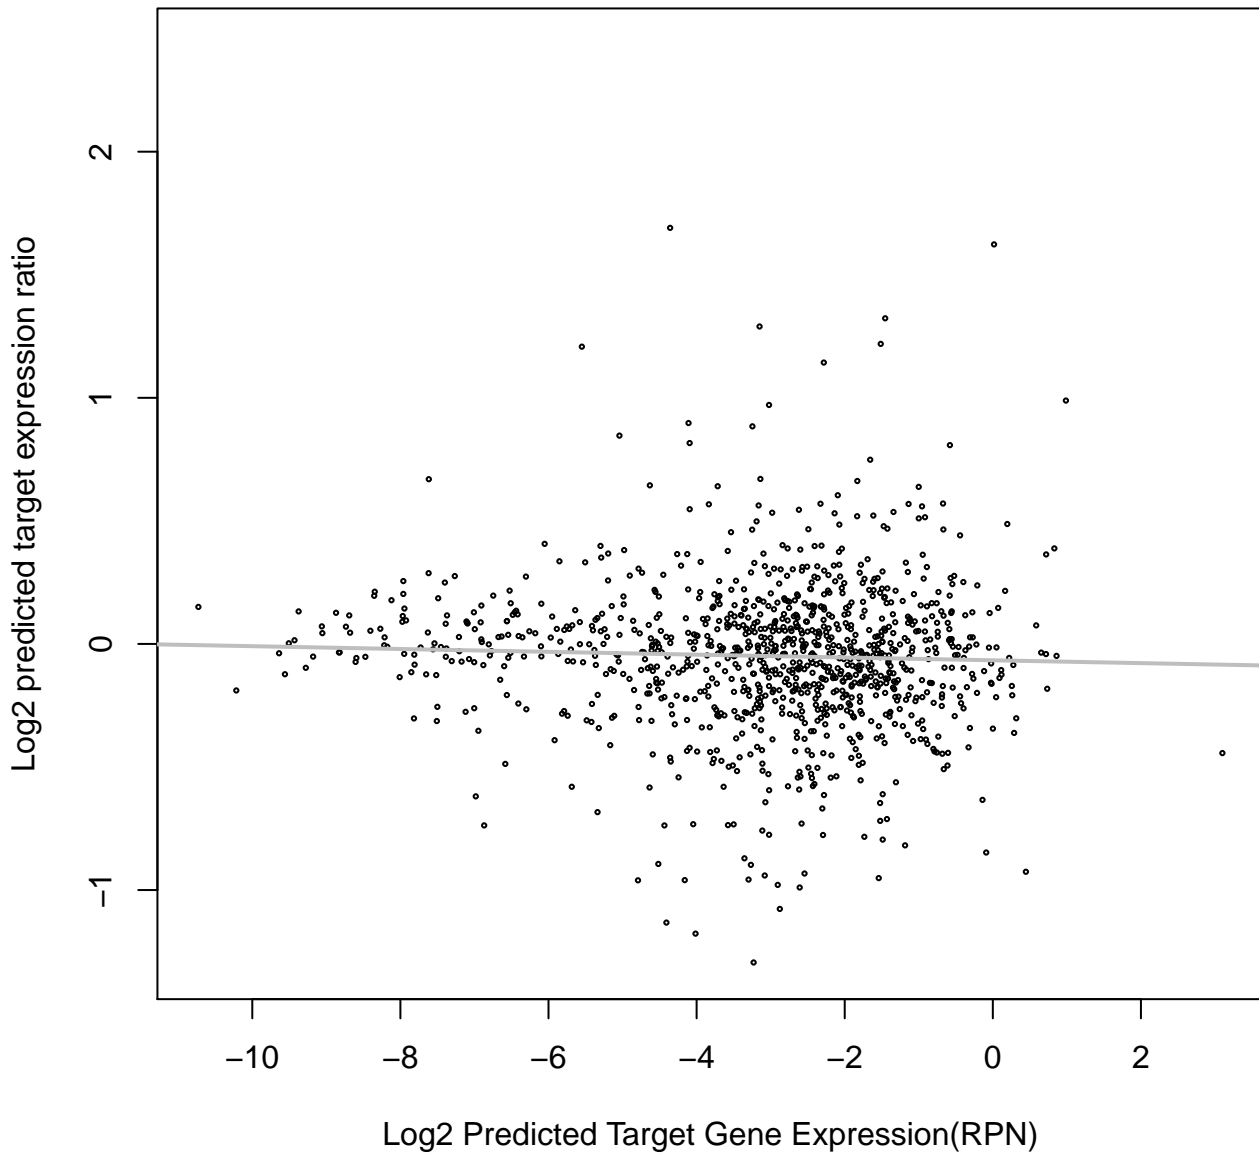

# jackson-45 - siMAPK14-193-mut4a

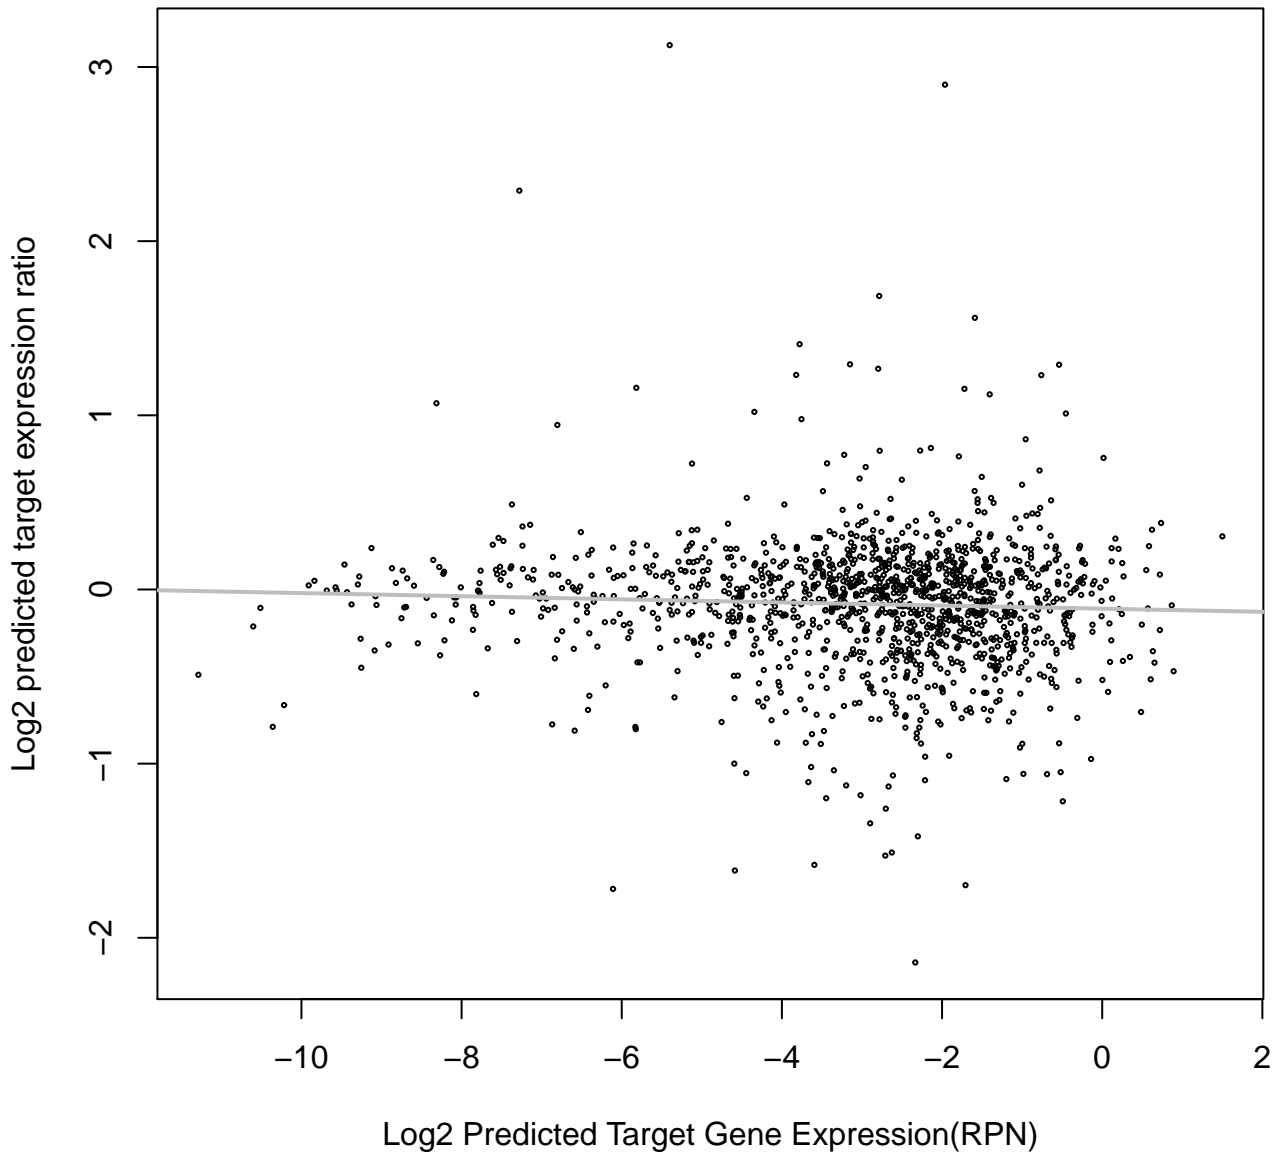

# jackson-46 - siMAPK14-193-mut3a

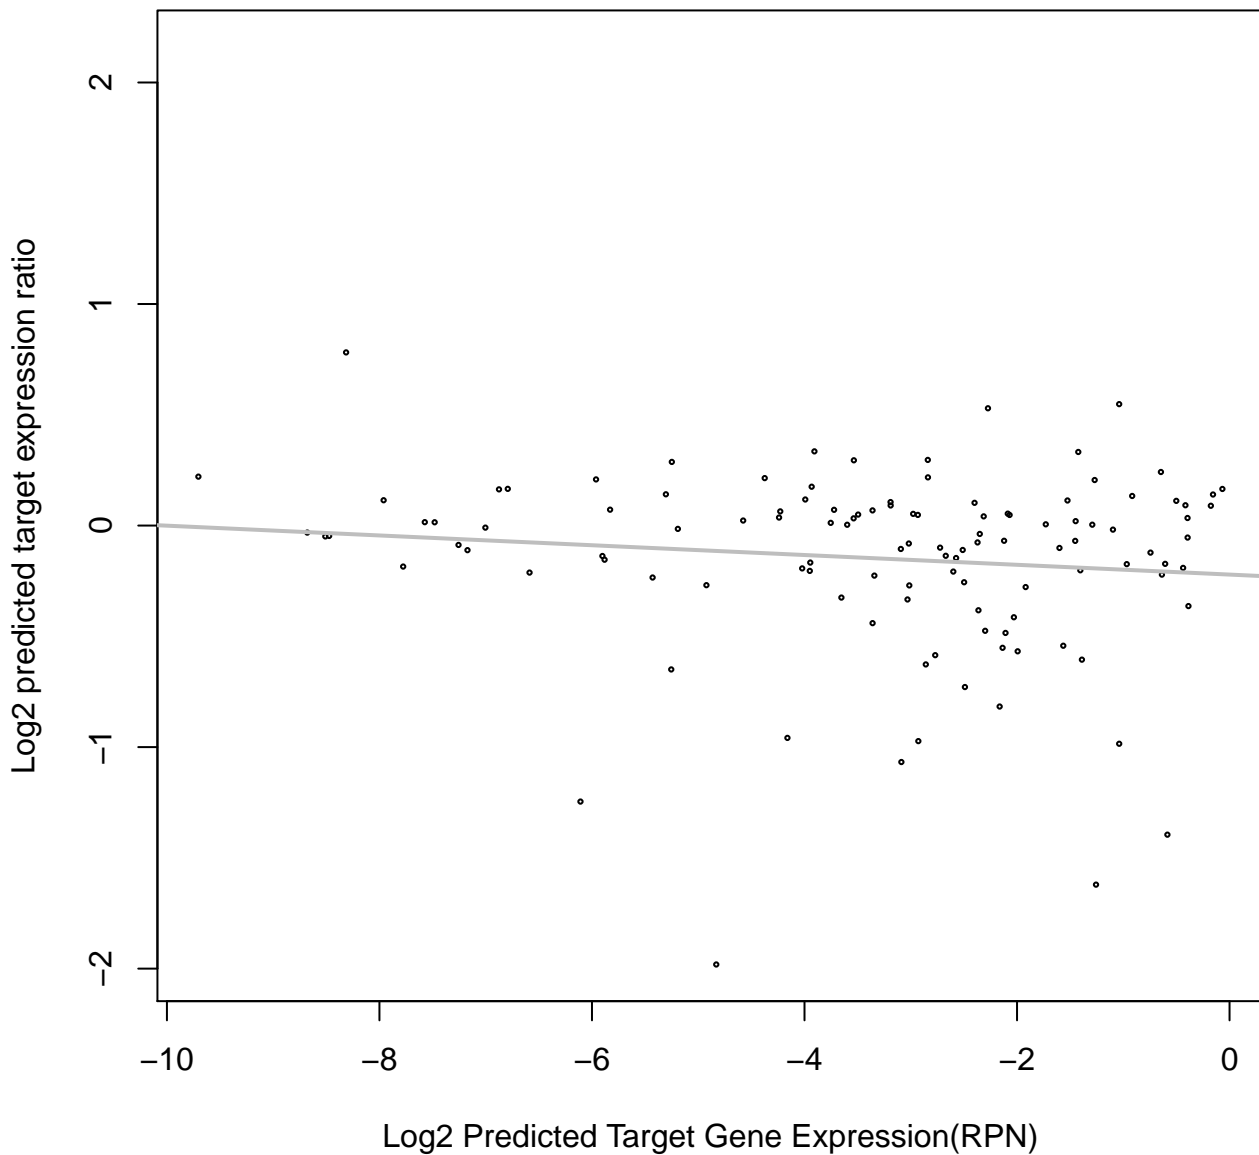

# jackson-47 - siMAPK14-193-mut2a

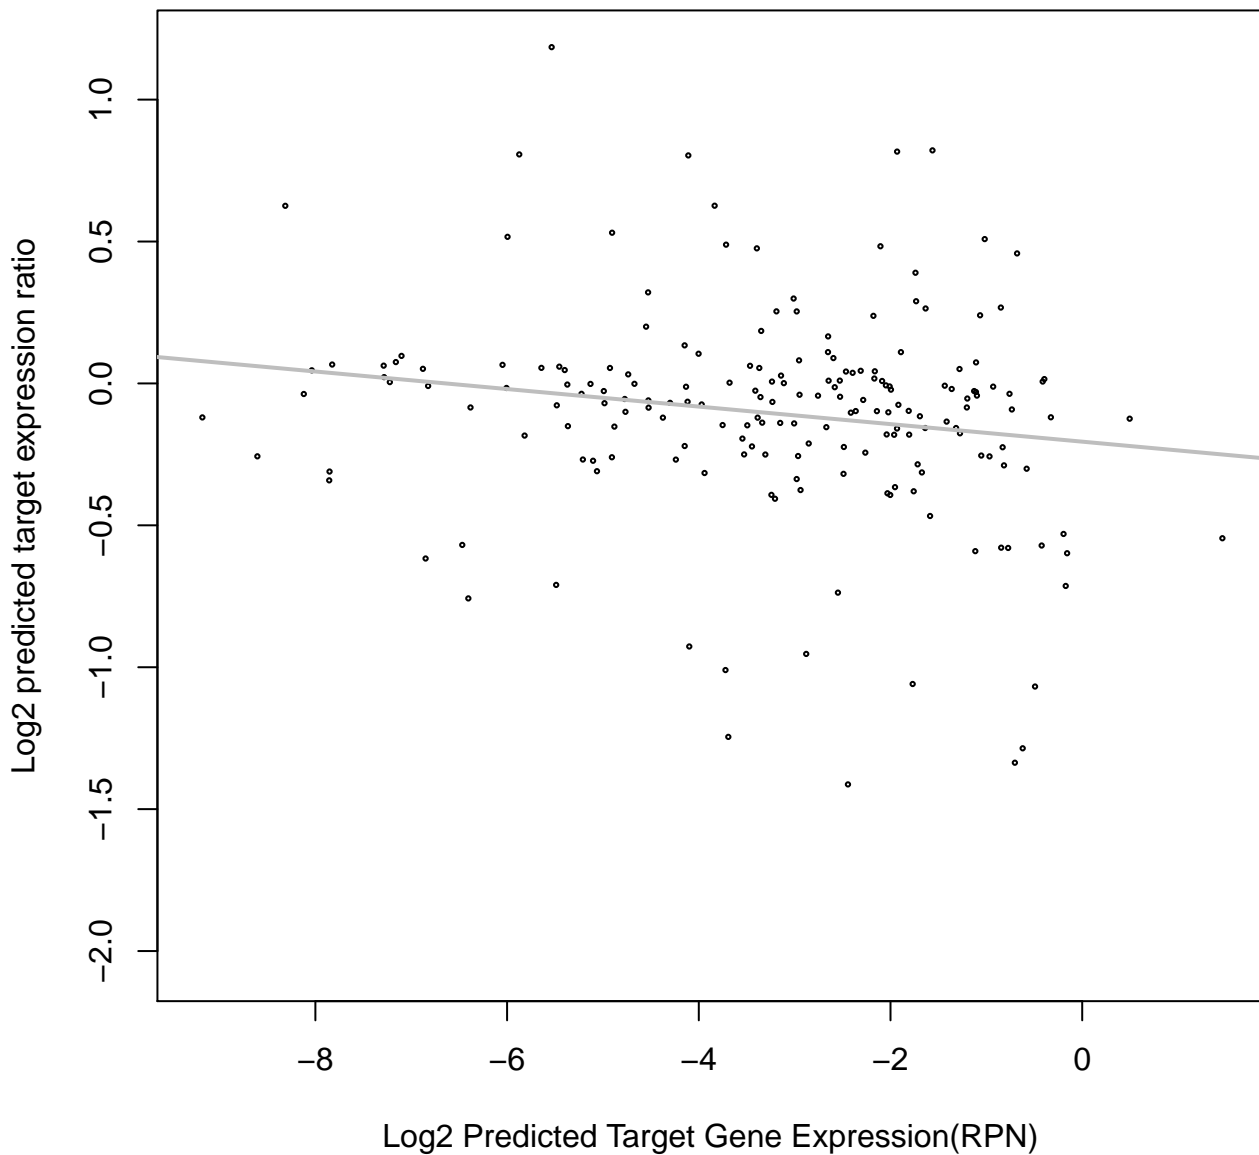

# jackson-48 - siMAPK14-193-mut1a

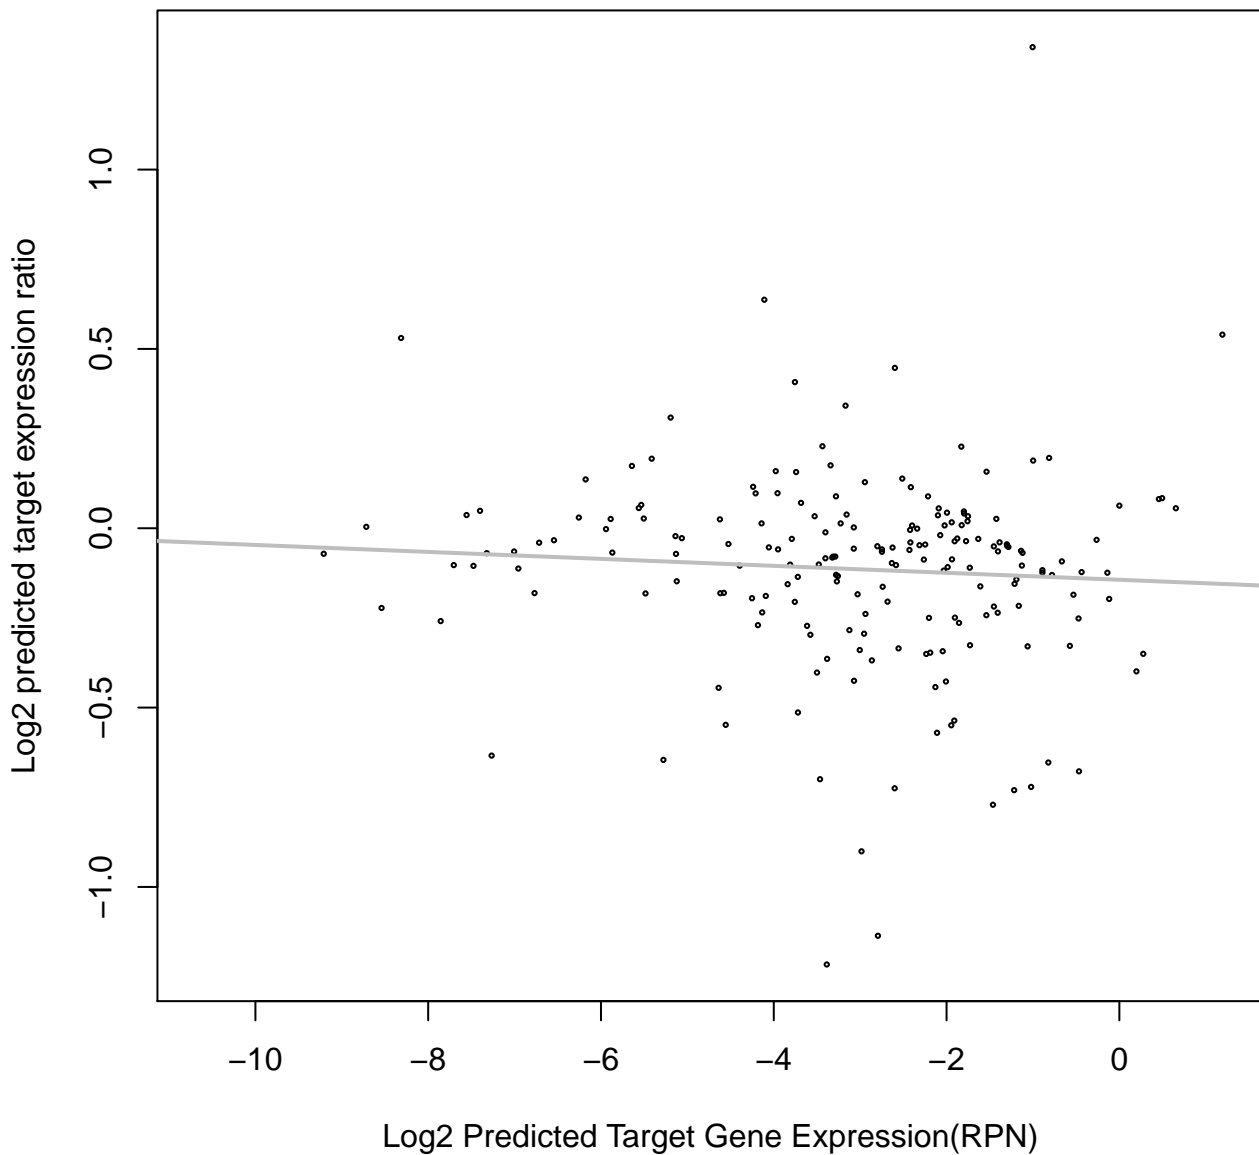



# jackson-49 – siMAPK14-193-mut19b

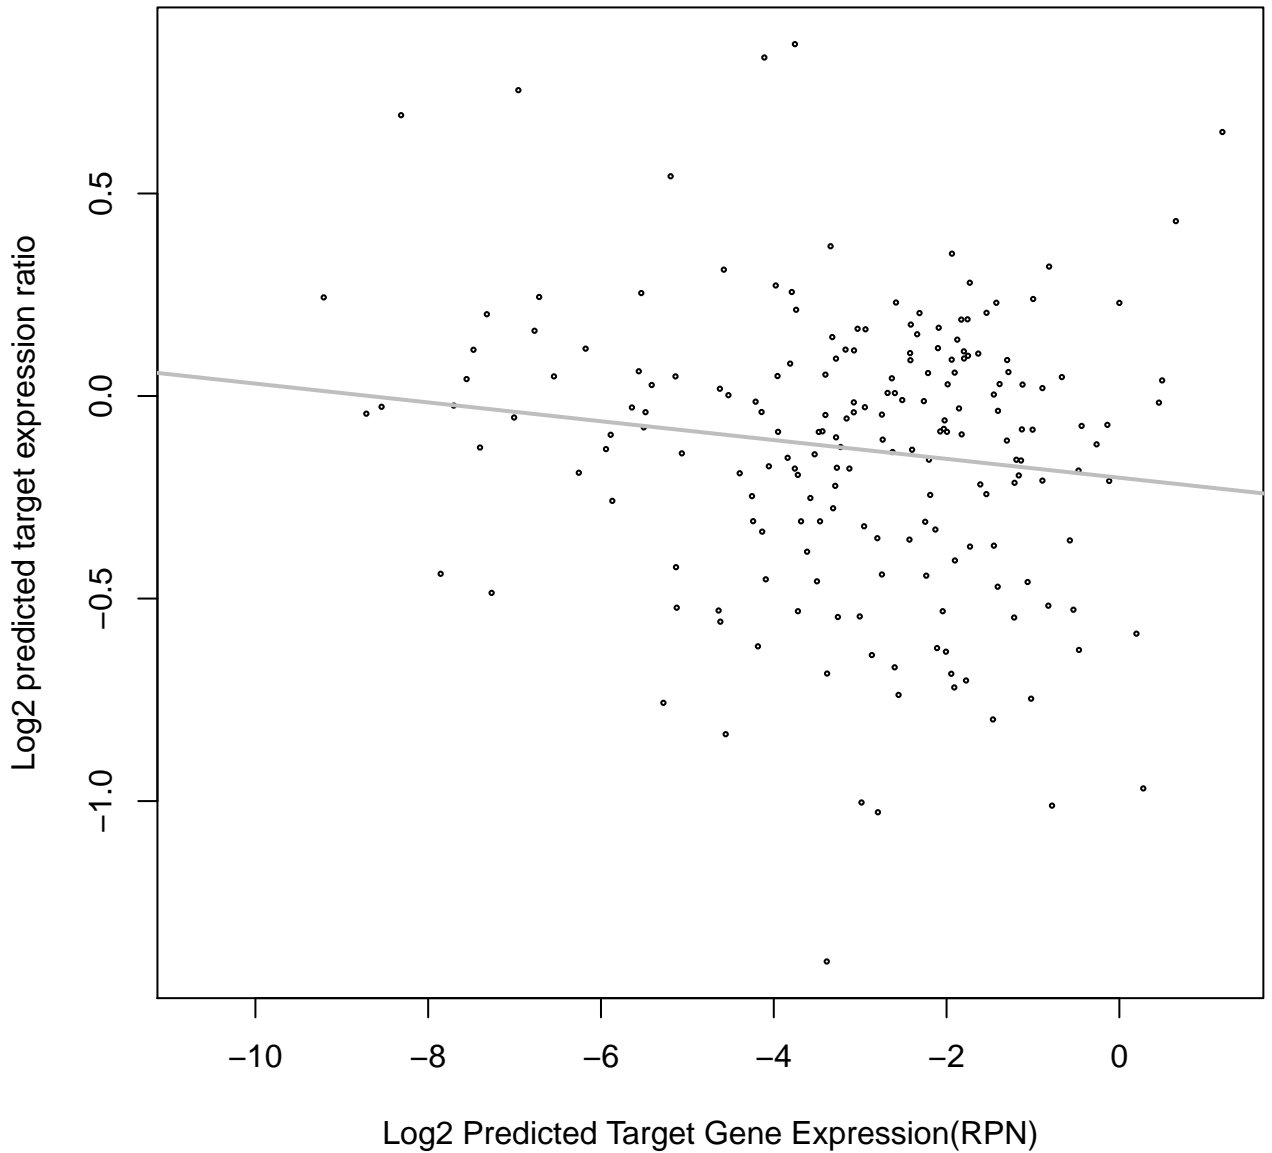

# jackson-50 – siMAPK14-193-mut18b

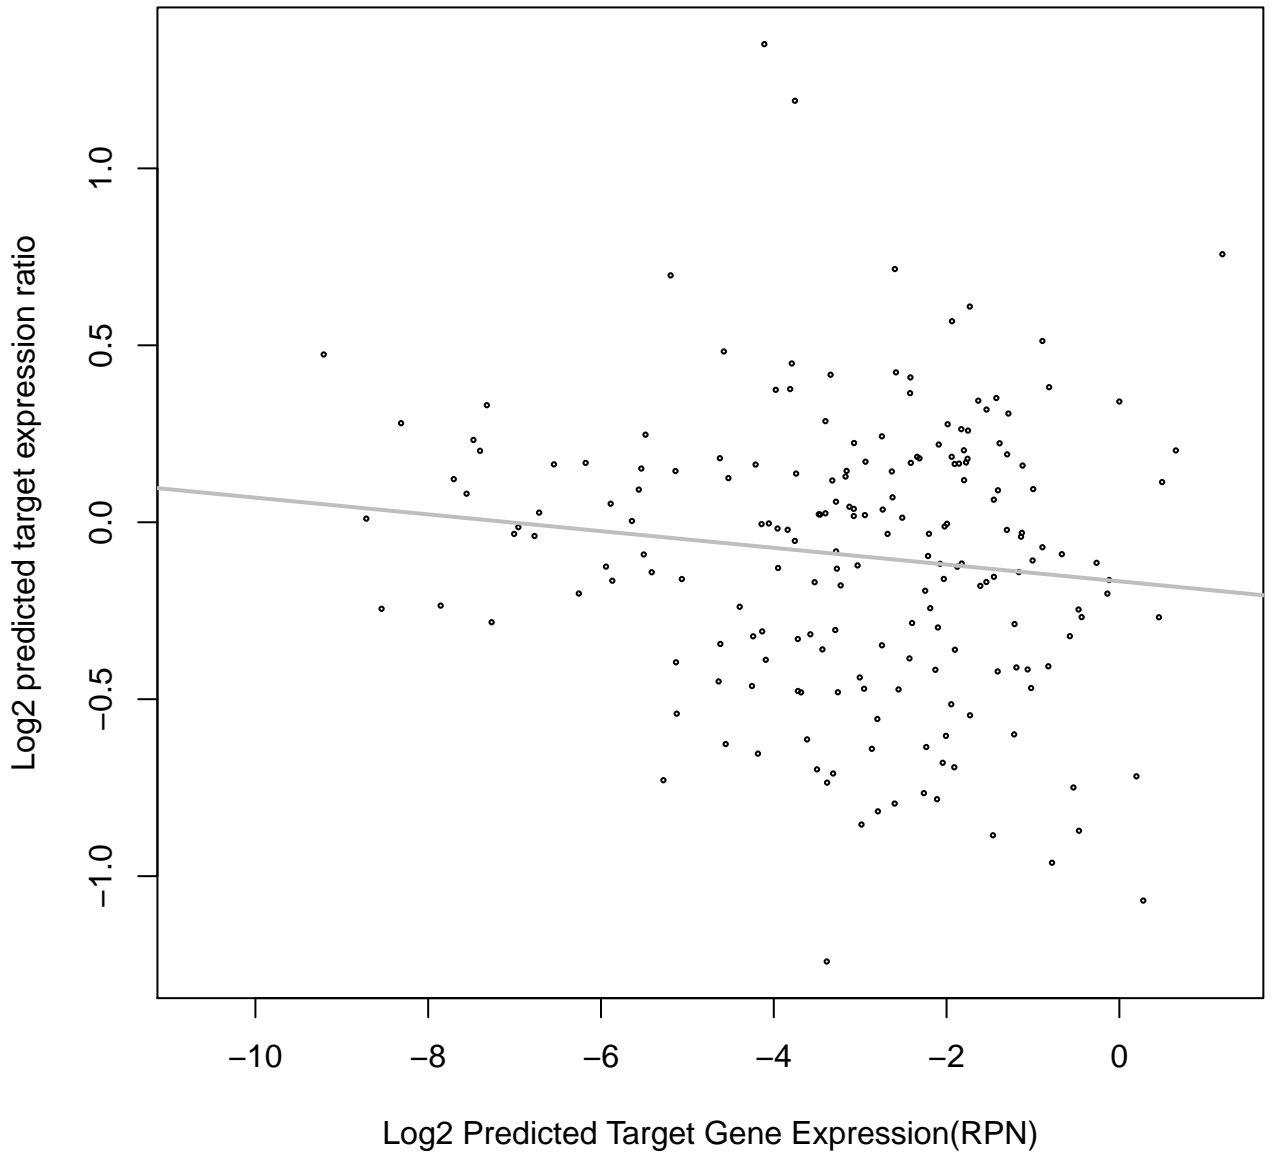

# jackson-51 - siMAPK14-193-mut17b

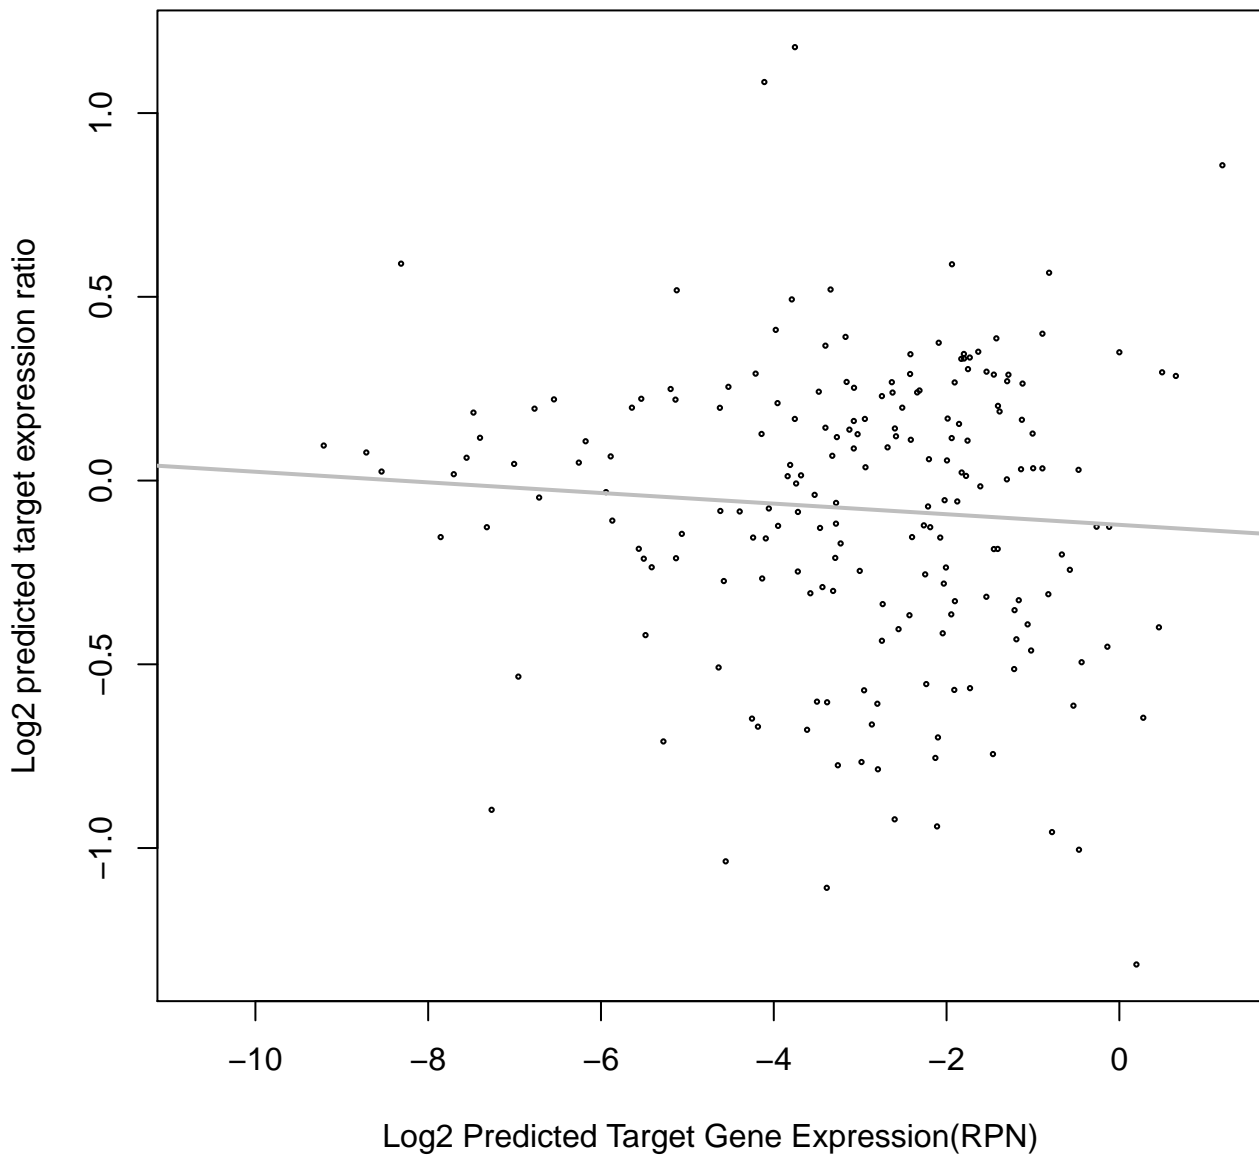

# jackson-52 – siMAPK14-193-mut16b

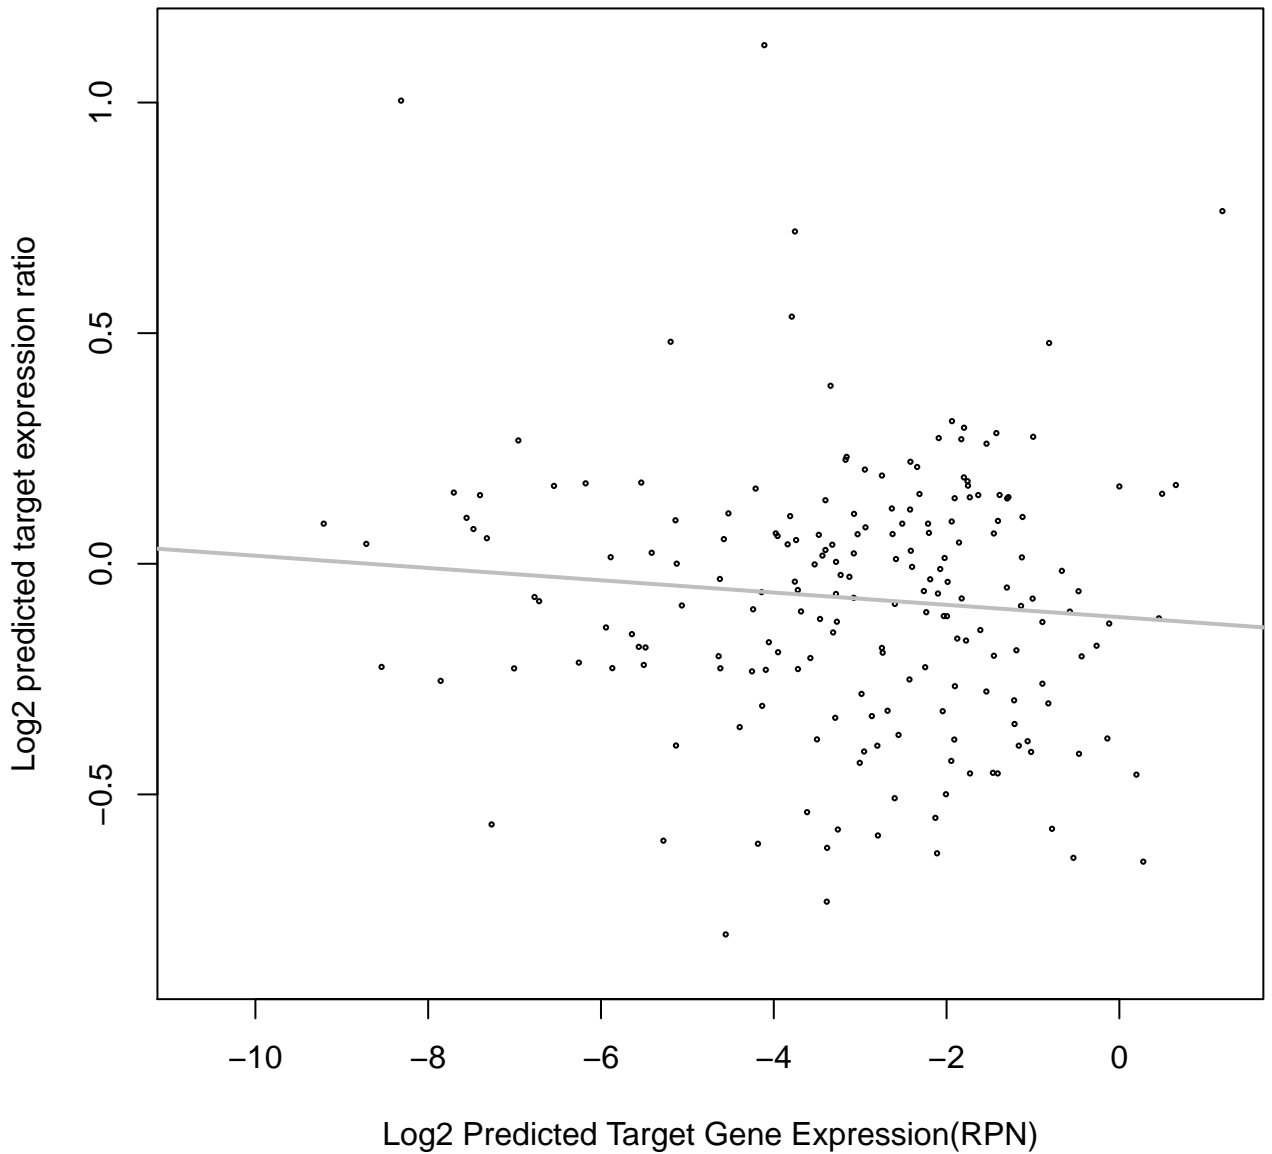

# jackson-53 – siMAPK14-193-mut15b

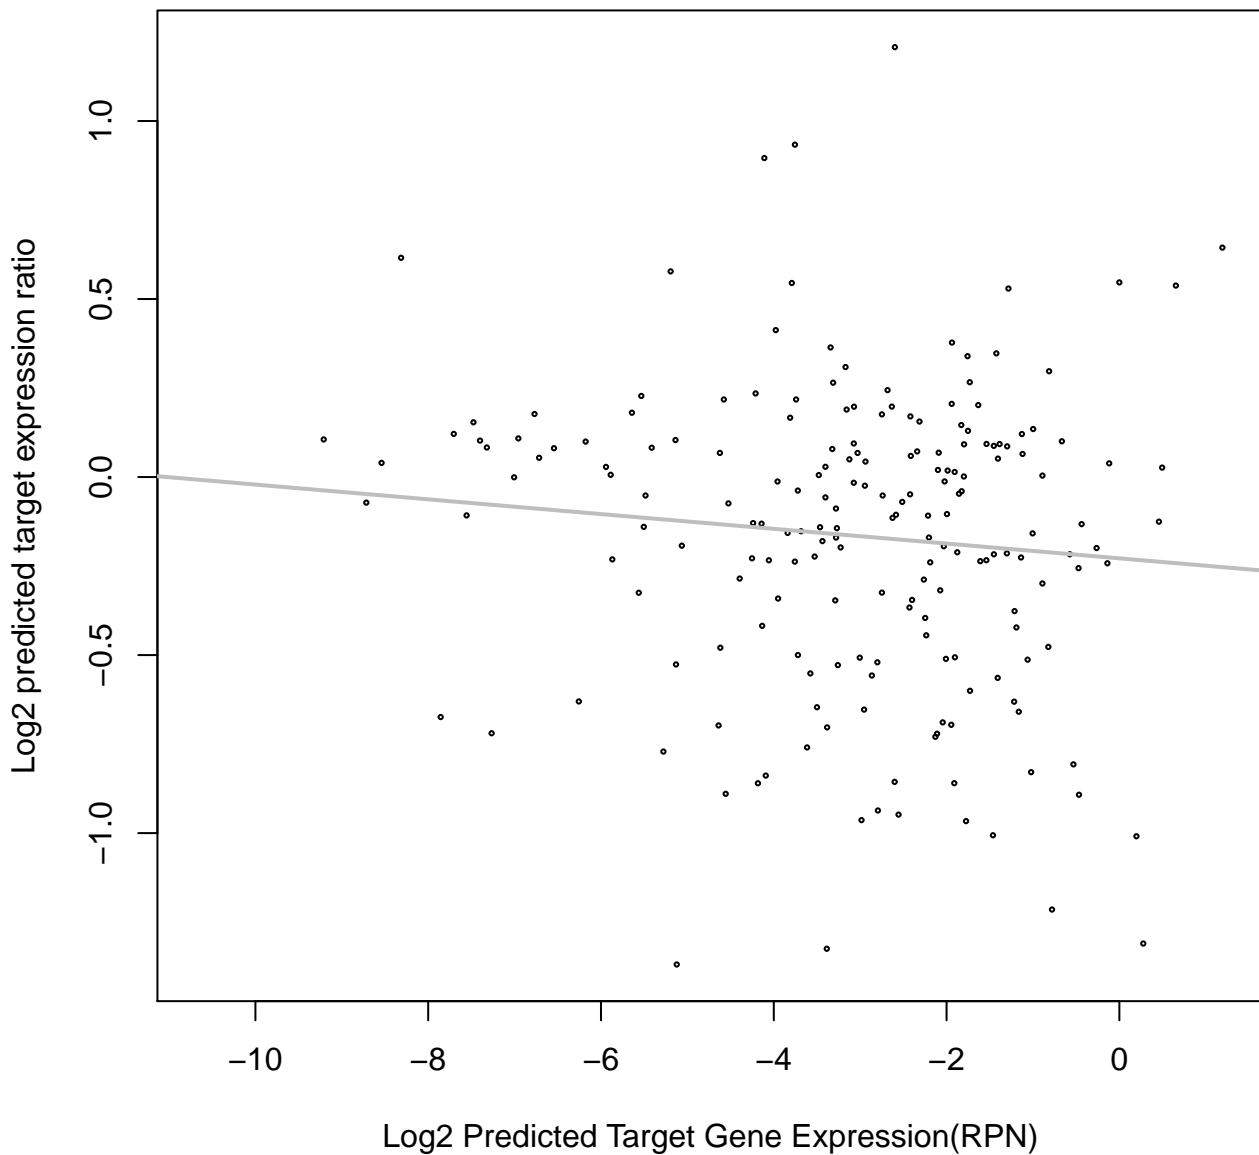

# jackson-54 - siMAPK14-193-mut14b

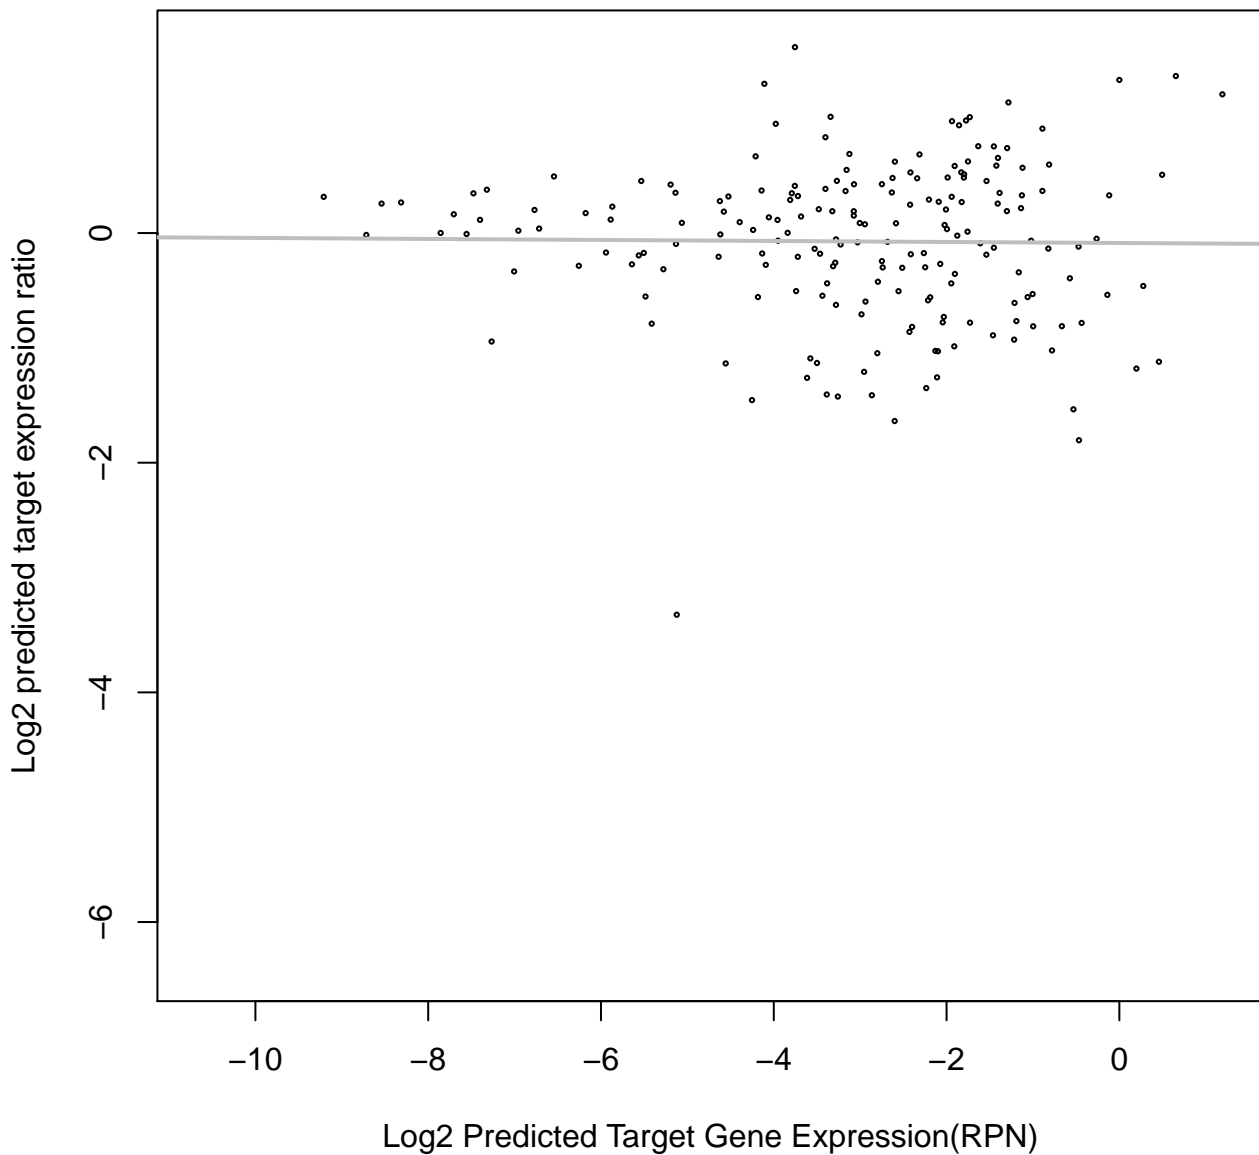

# jackson-55 - siMAPK14-193-mut13b

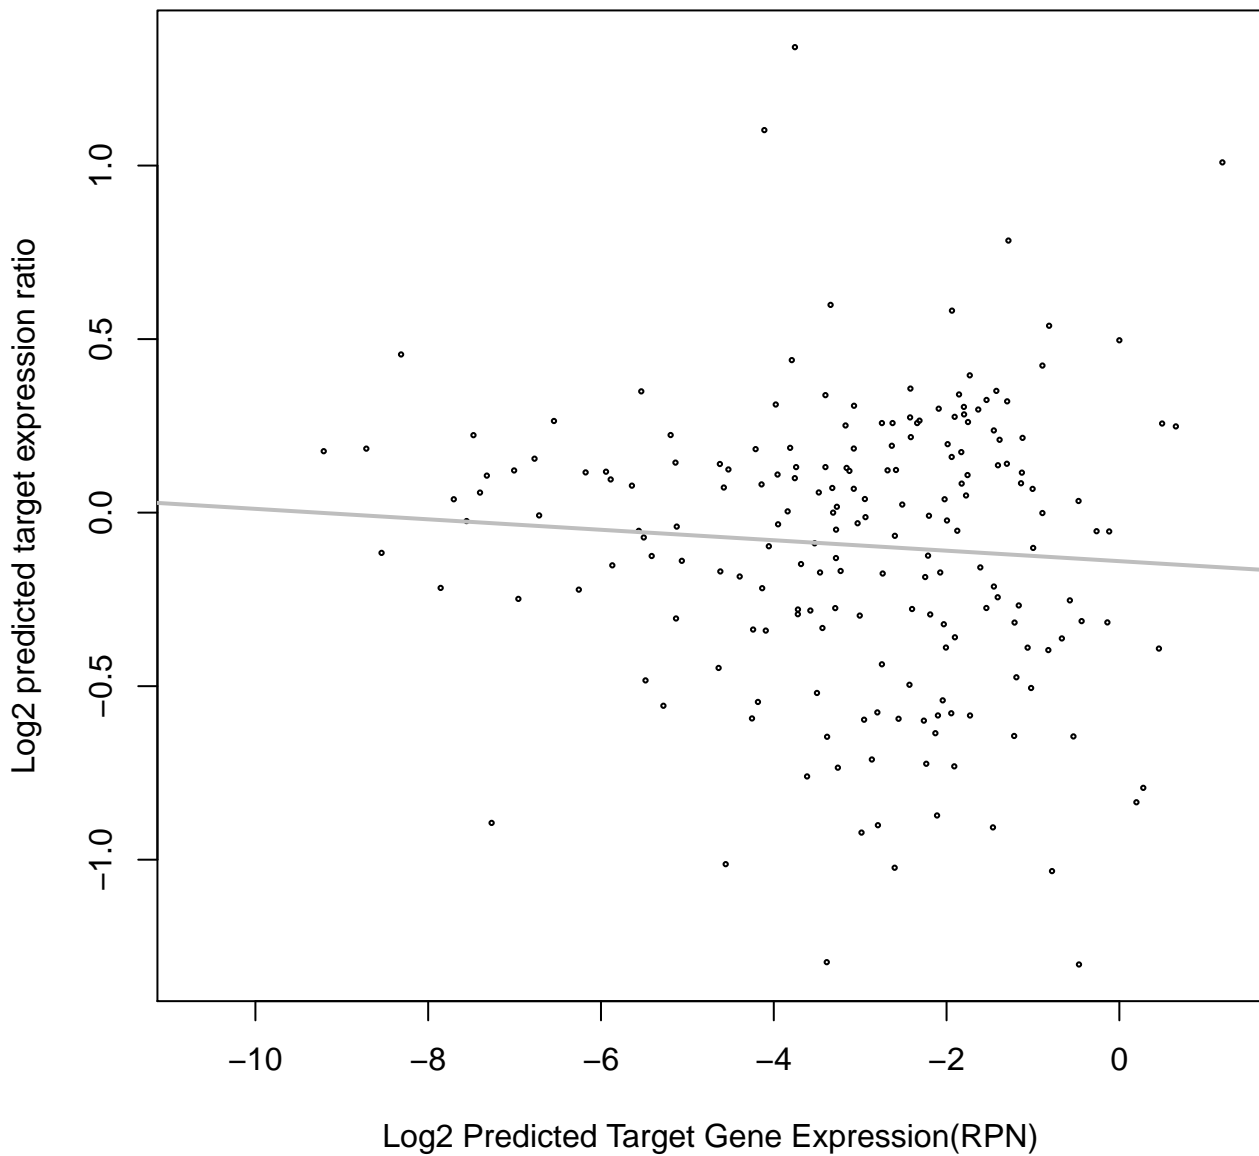

# jackson-56 - siMAPK14-193-mut12b

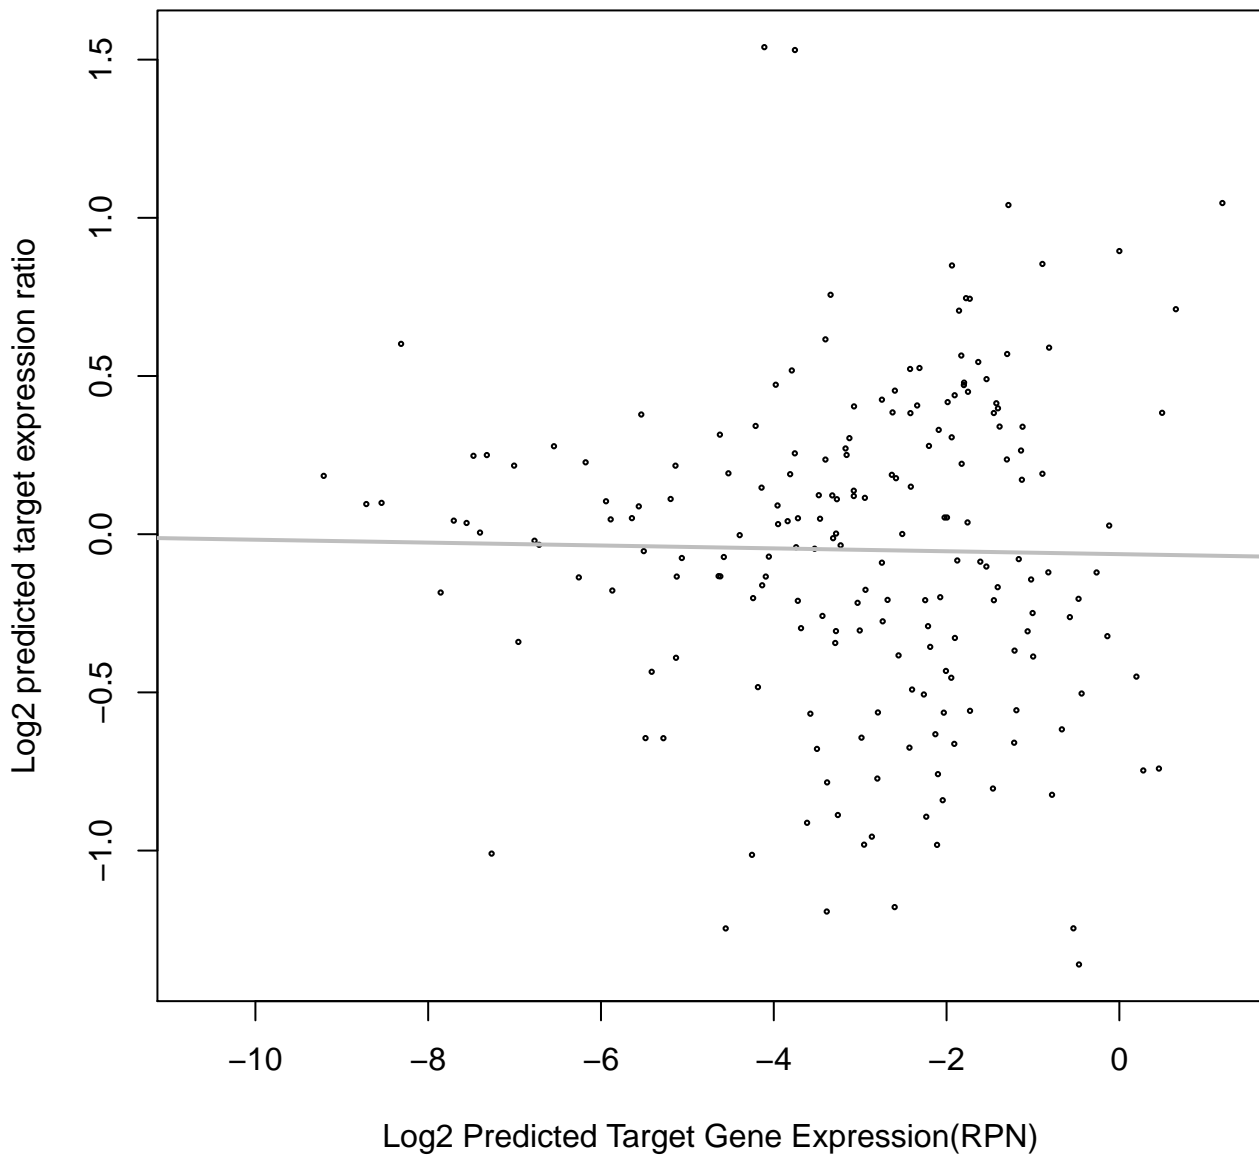



# jackson-57 - siMAPK14-193-mut11b

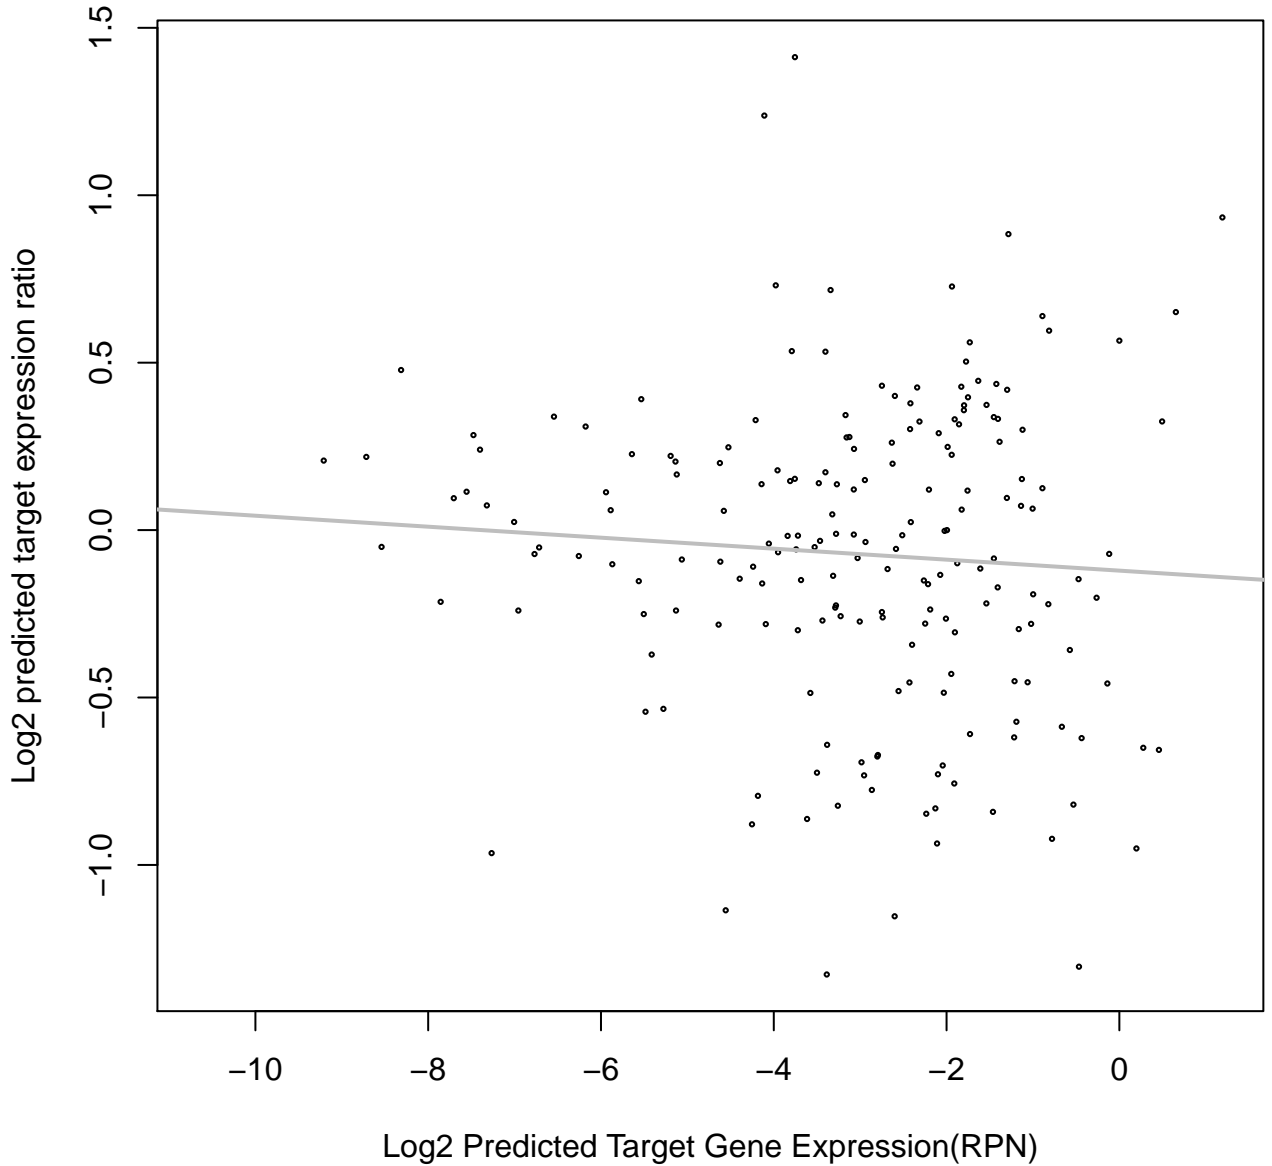

# jackson-58 - siMAPK14-193-mut10b

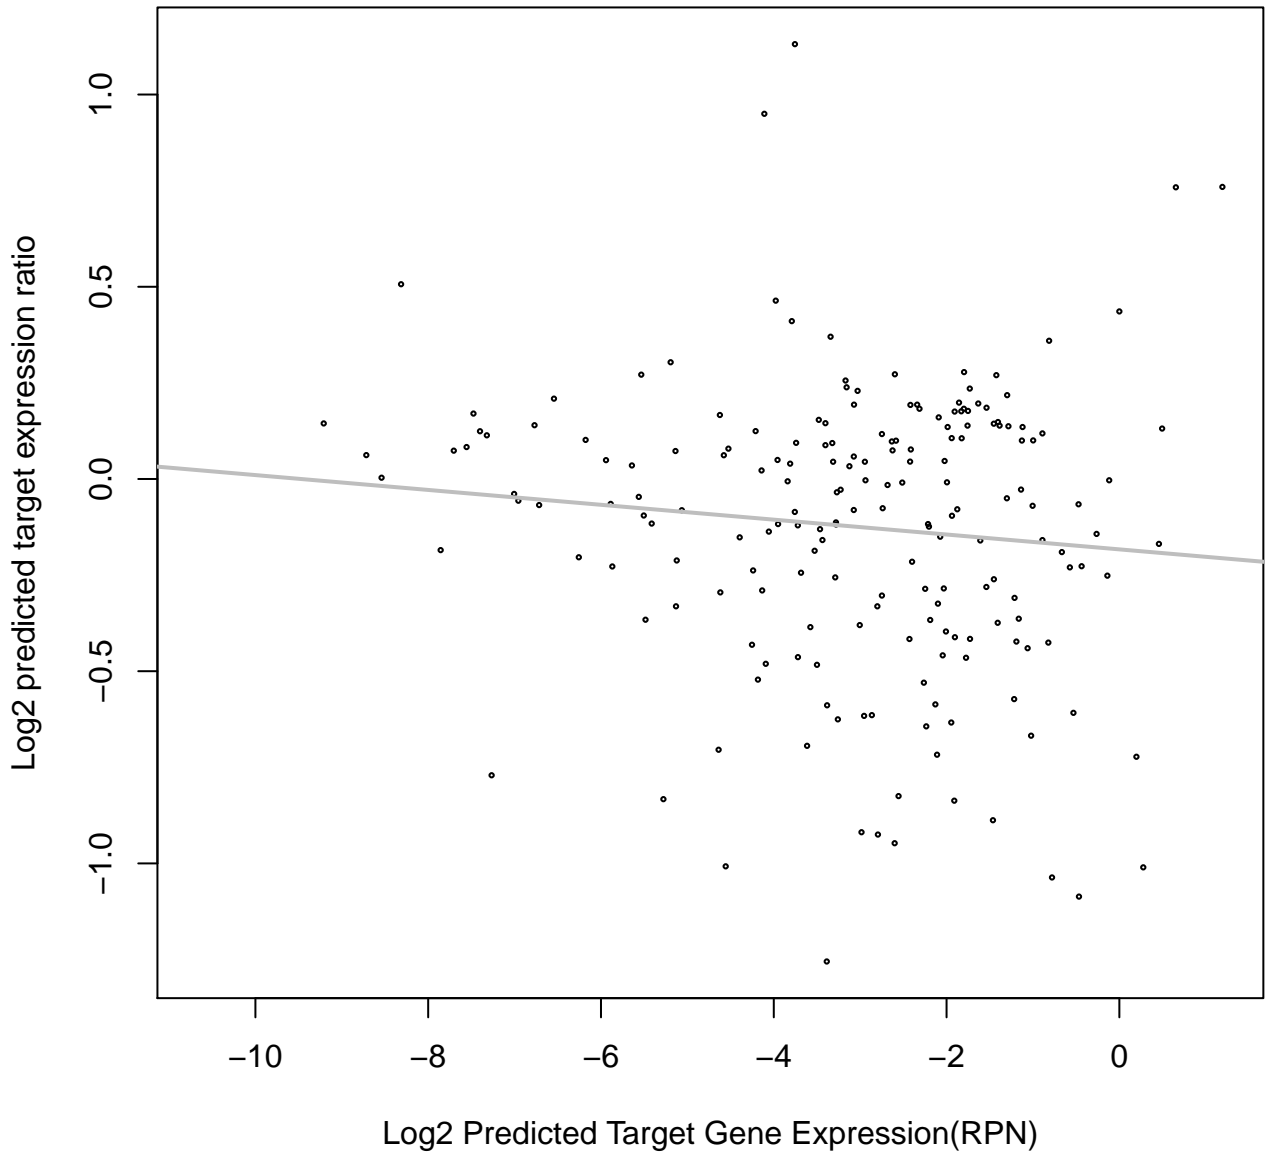

# jackson-59 - siMAPK14-193-mut9b

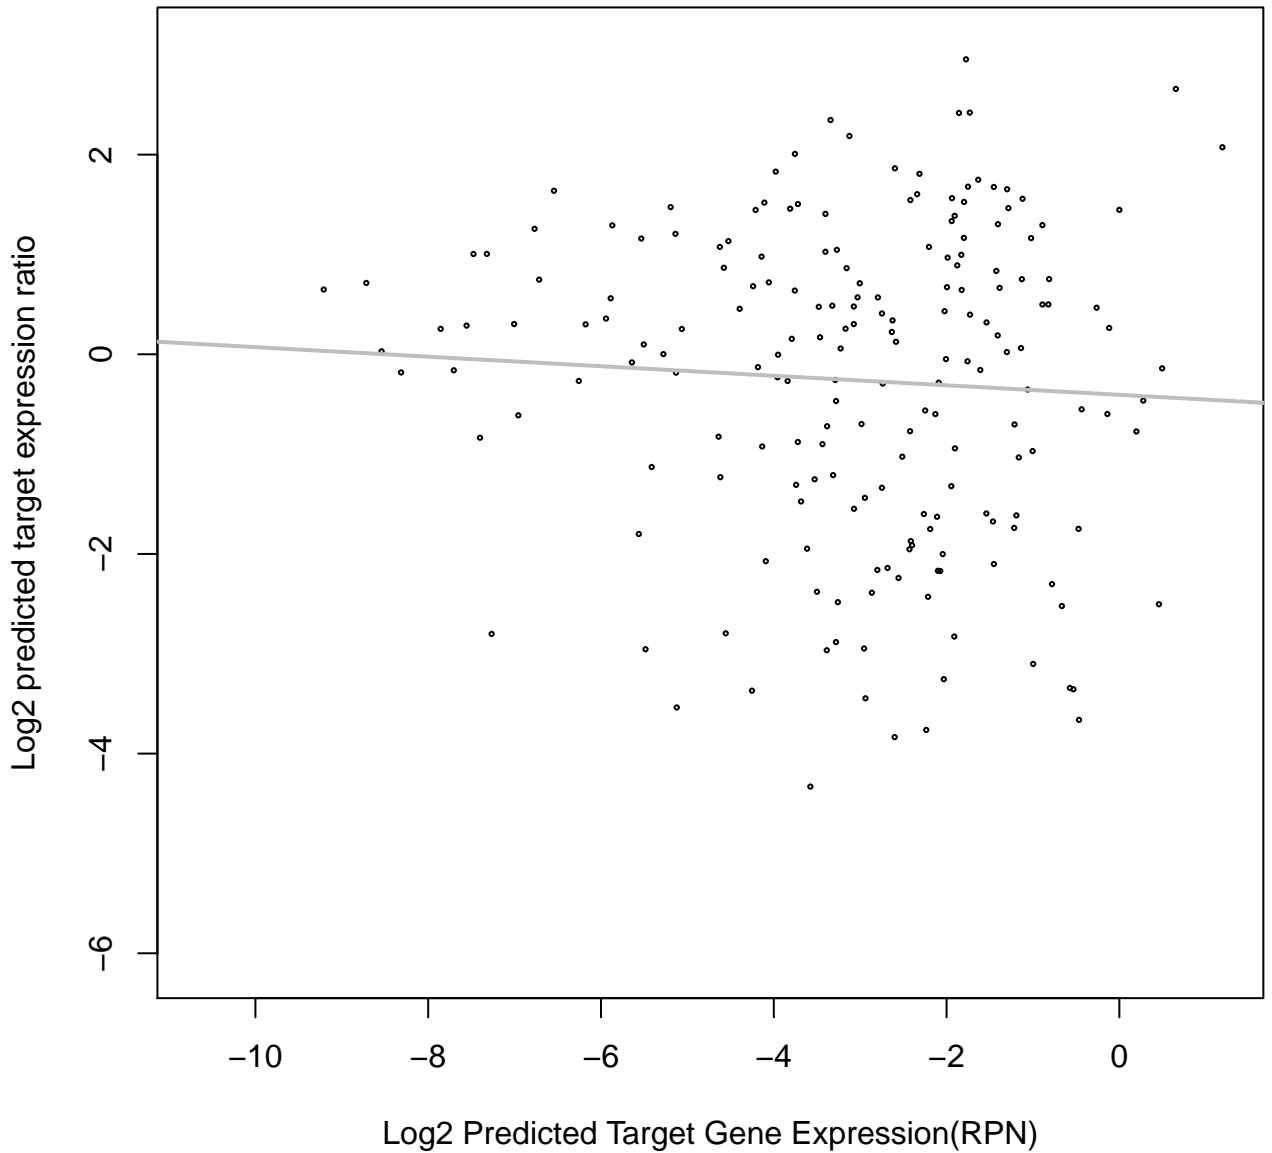

# jackson-60 - siMAPK14-193-mut8b

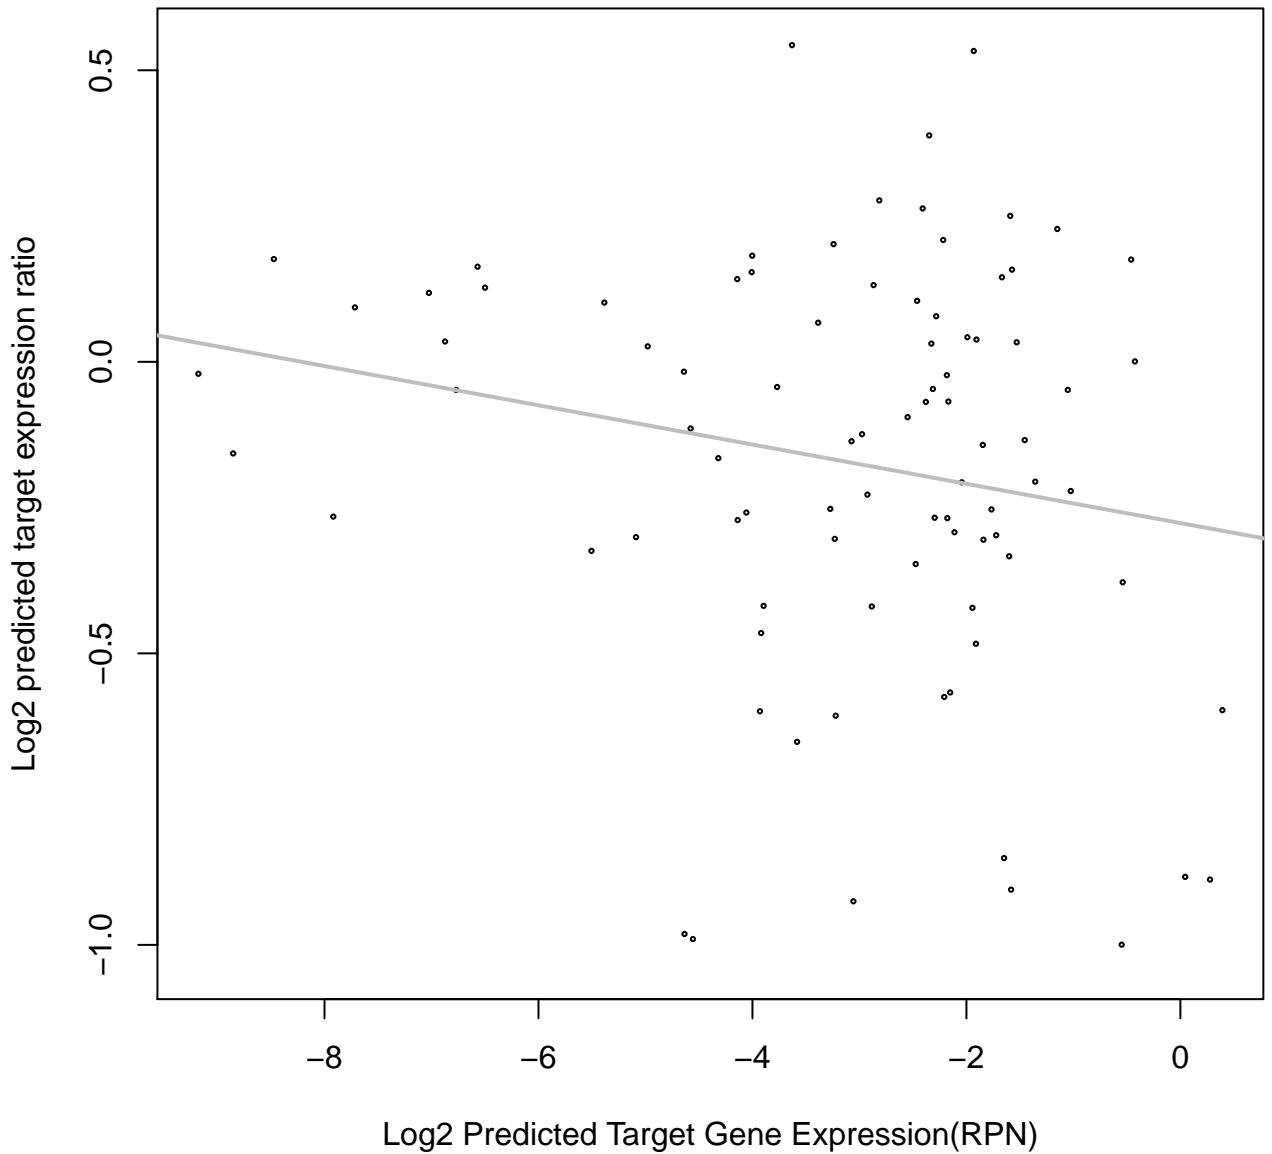

# jackson-61 - siMAPK14-193-mut7b

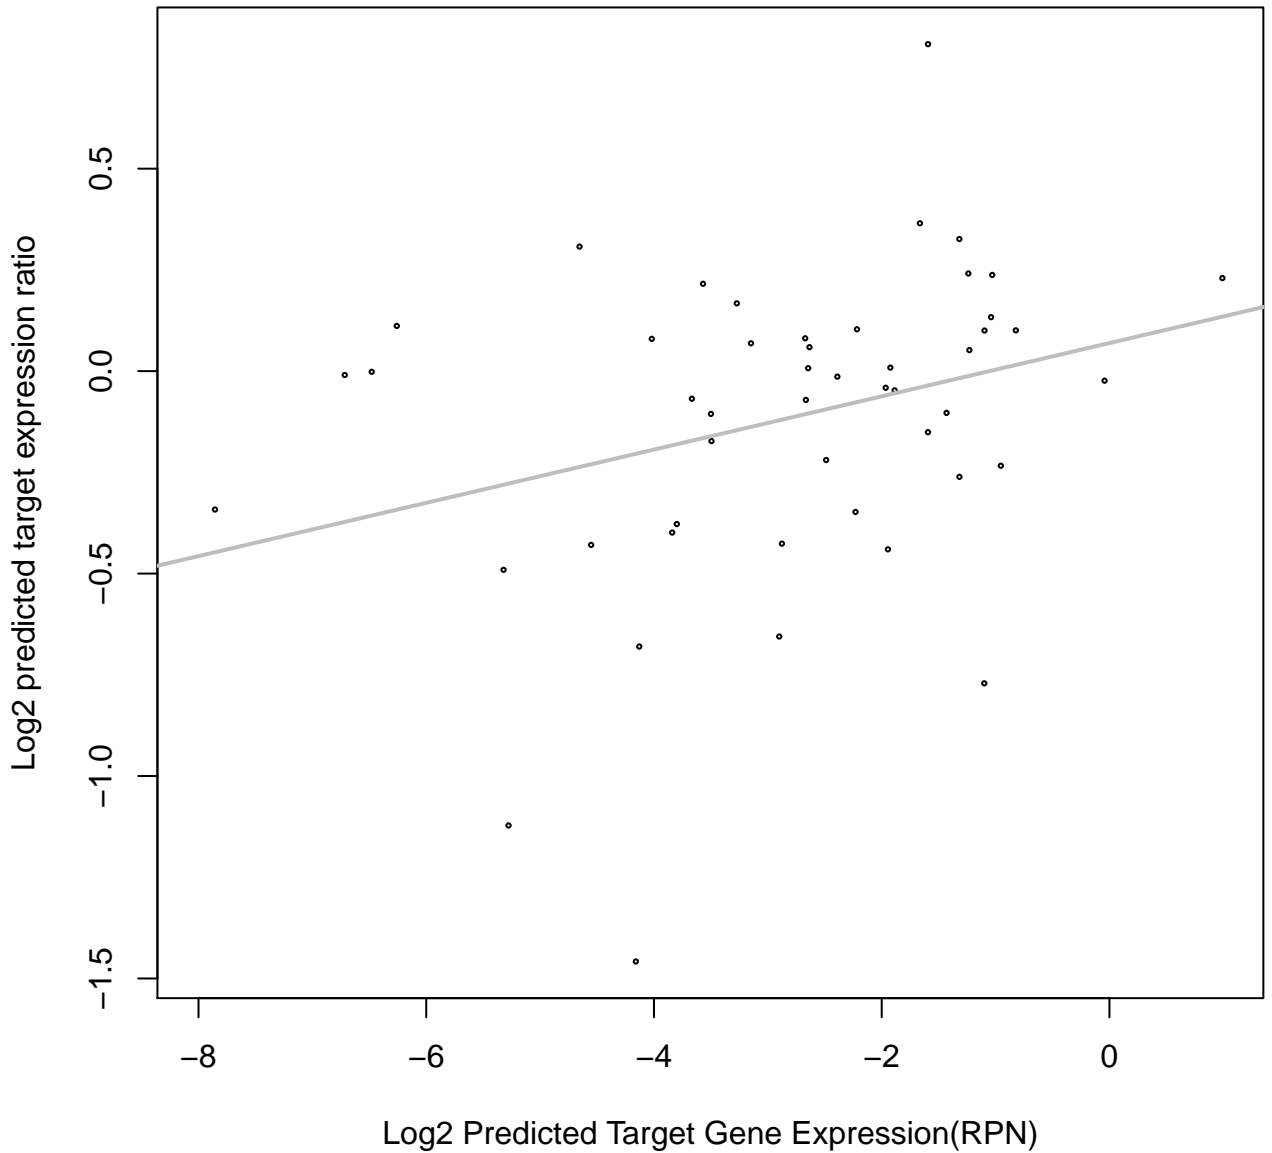

# jackson-62 - siMAPK14-193-mut6b

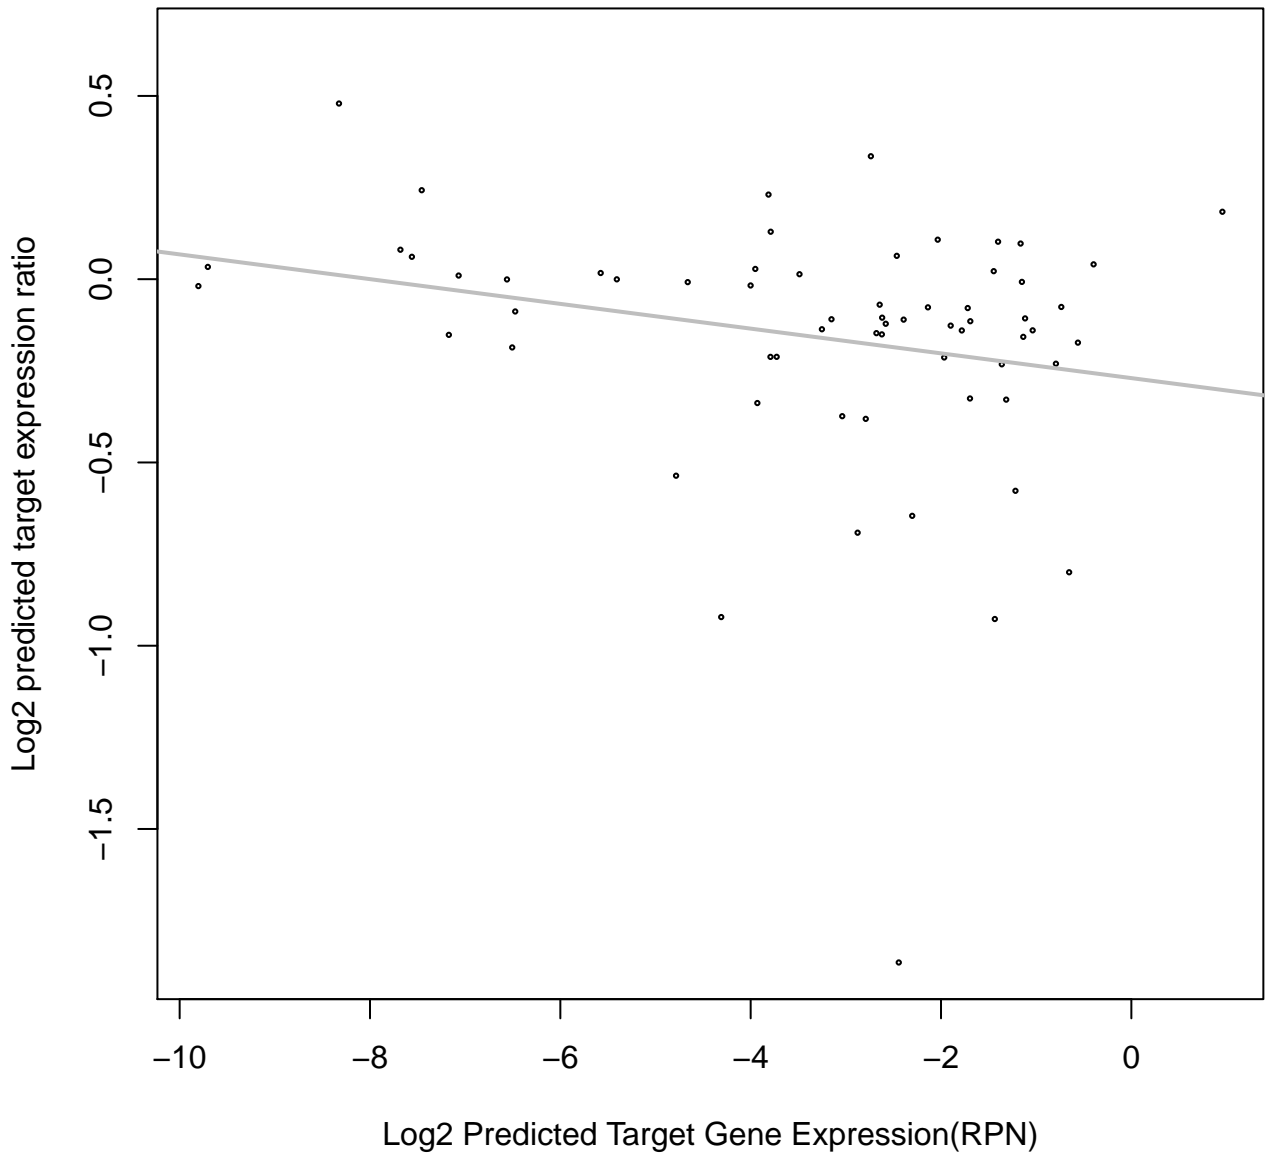

# jackson-63 - siMAPK14-193-mut5b

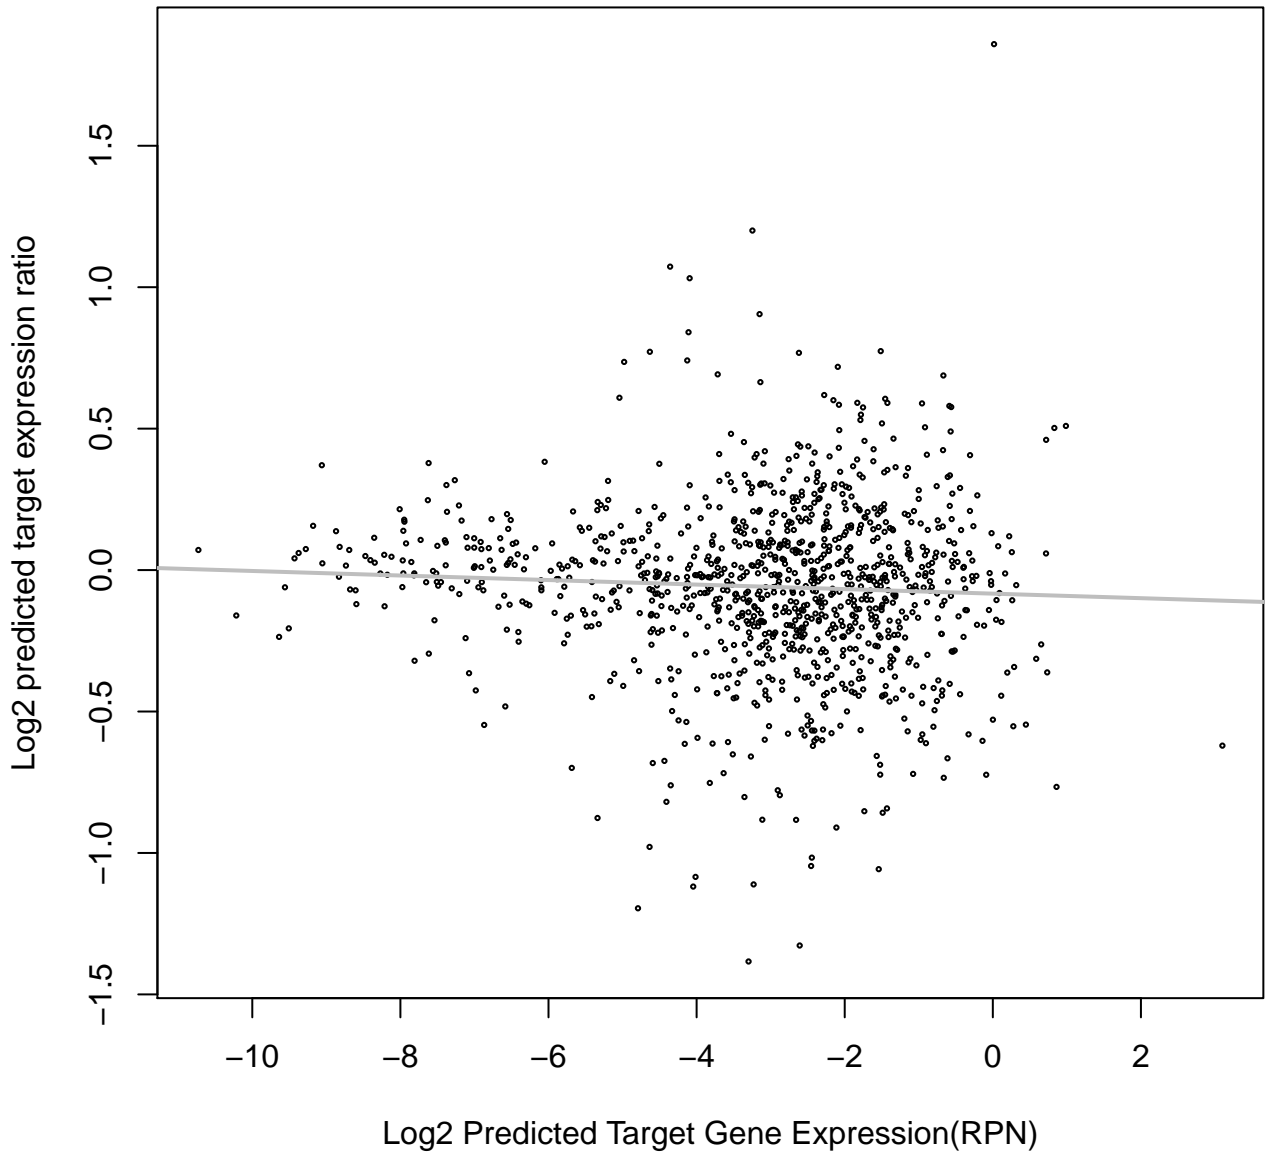

# jackson-64 - siMAPK14-193-mut4b

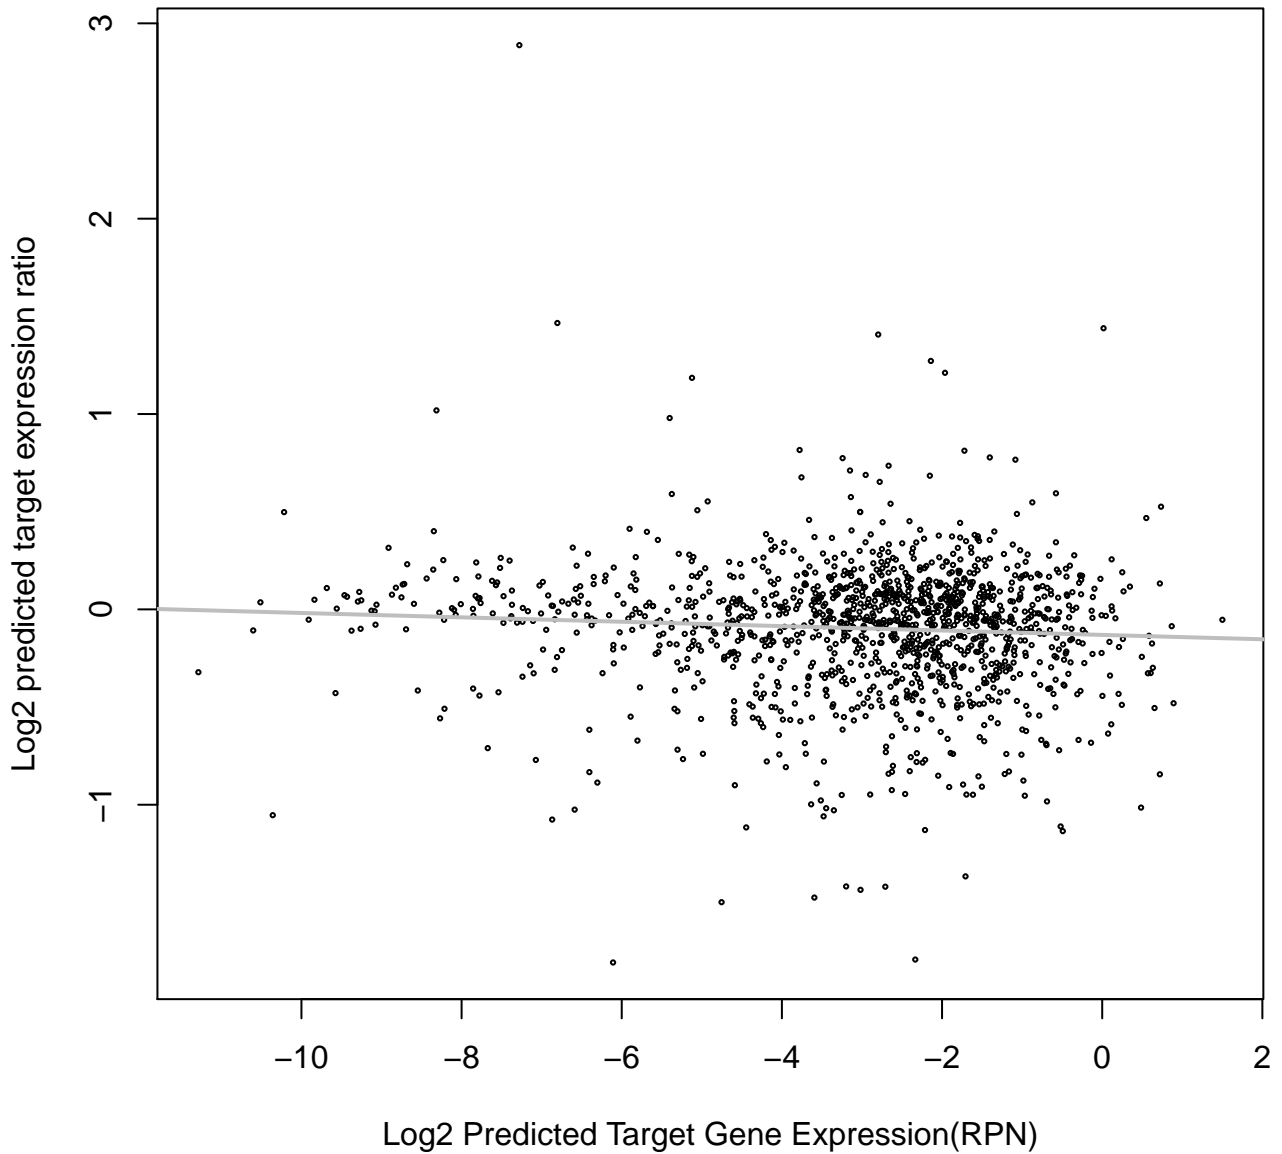



# jackson-65 - siMAPK14-193-mut3b

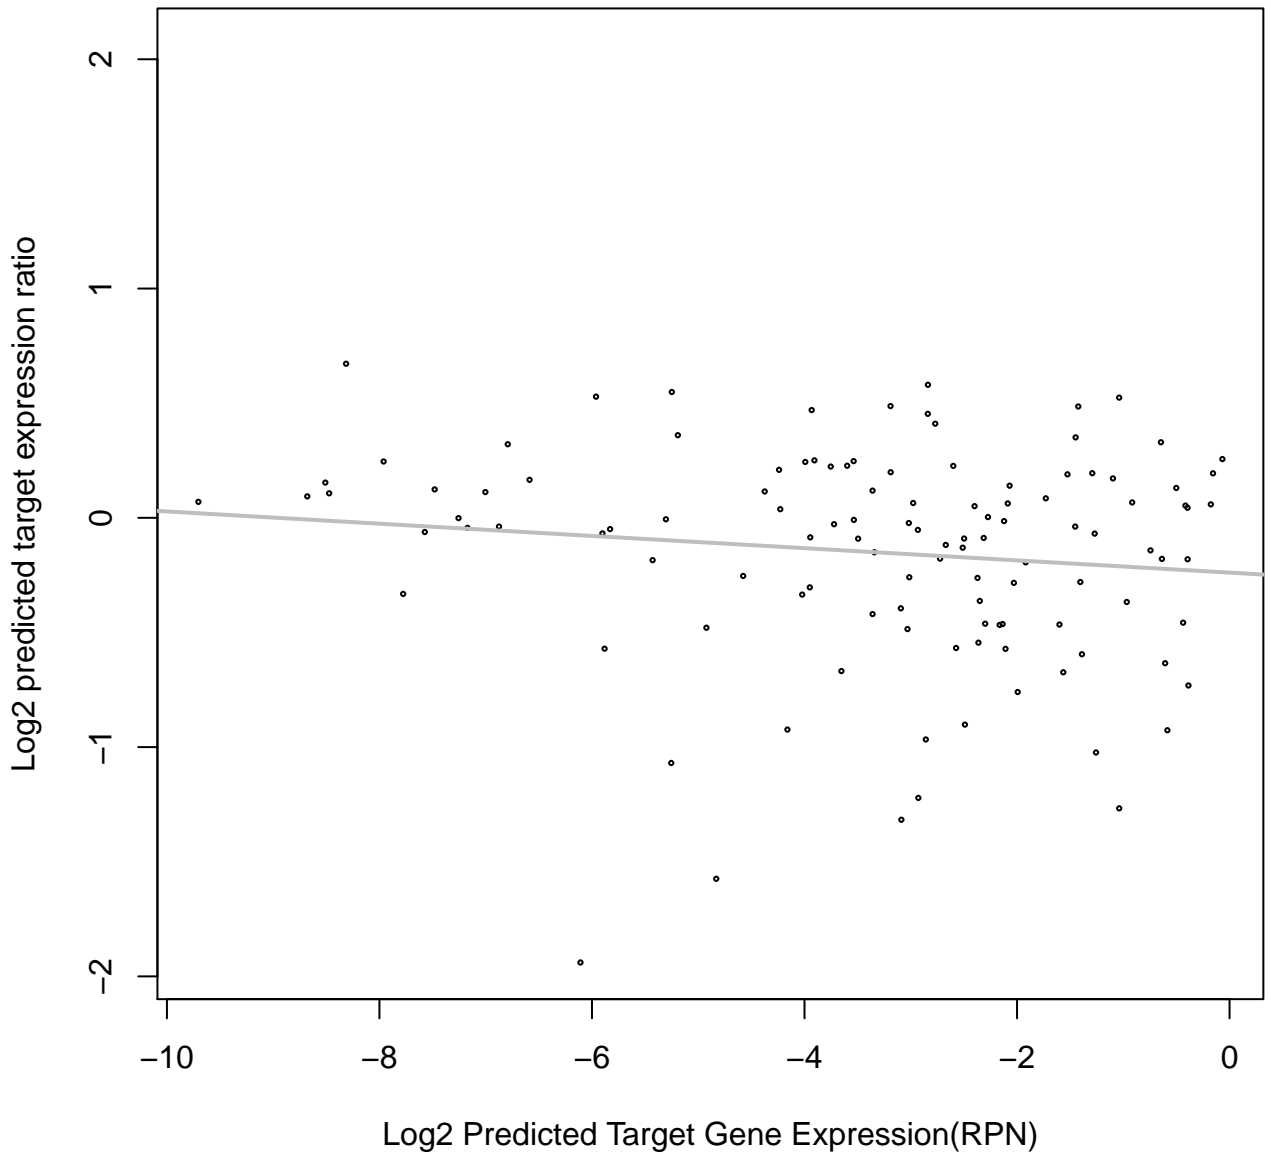

# jackson-66 - siMAPK14-193-mut2b

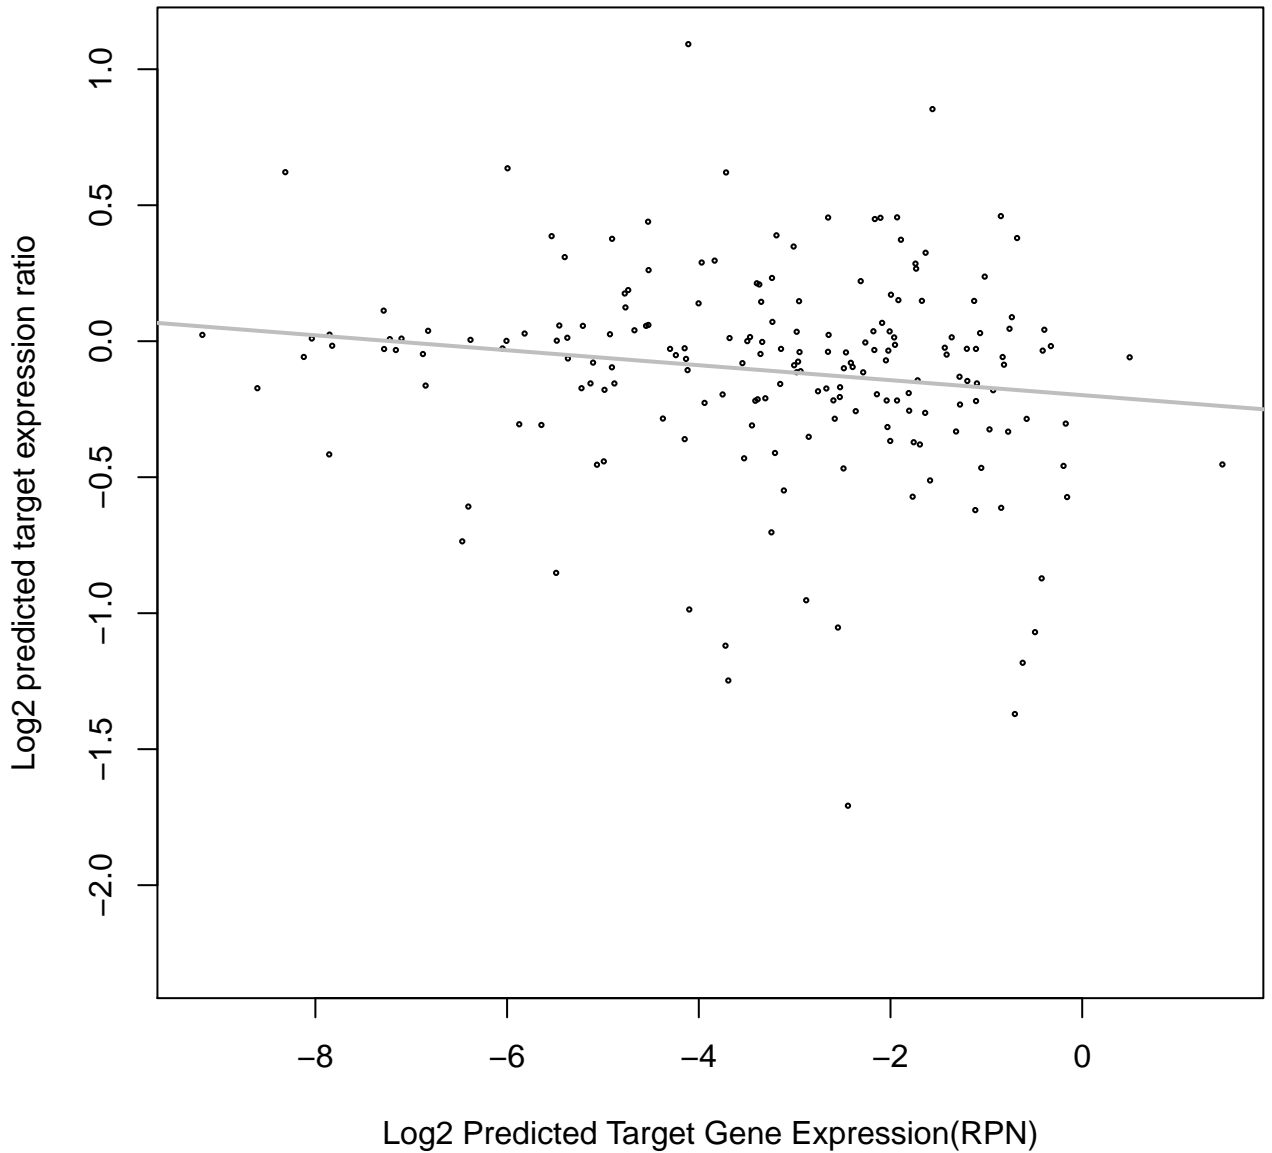

# jackson-67 - siMAPK14-193-mut1b

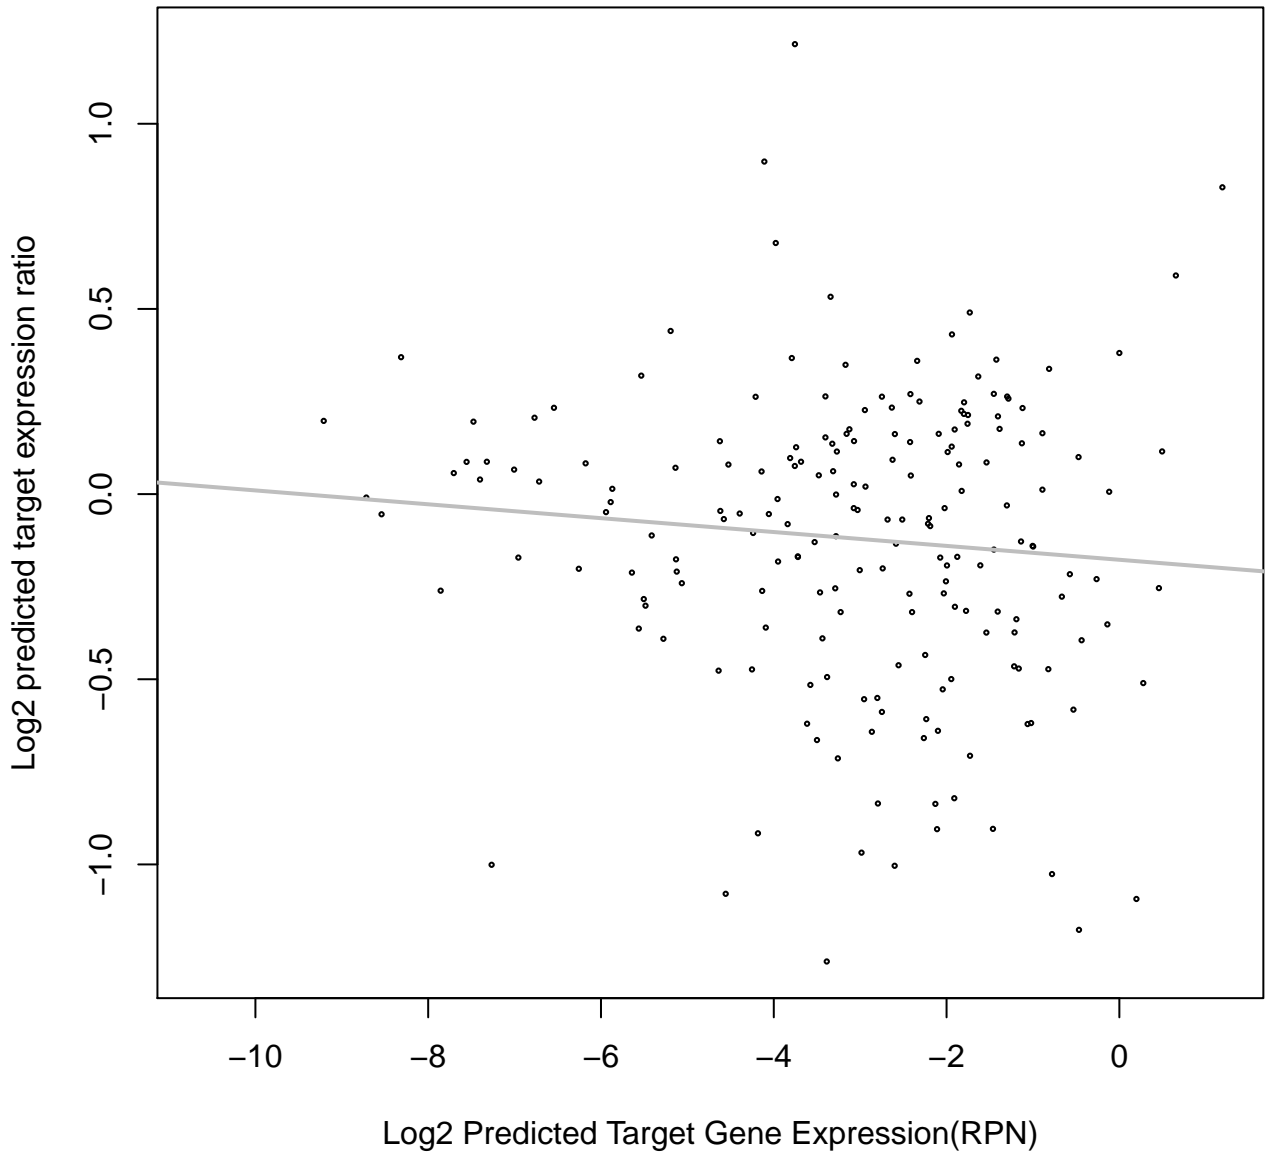

# kittler-144 - MAPK14-793

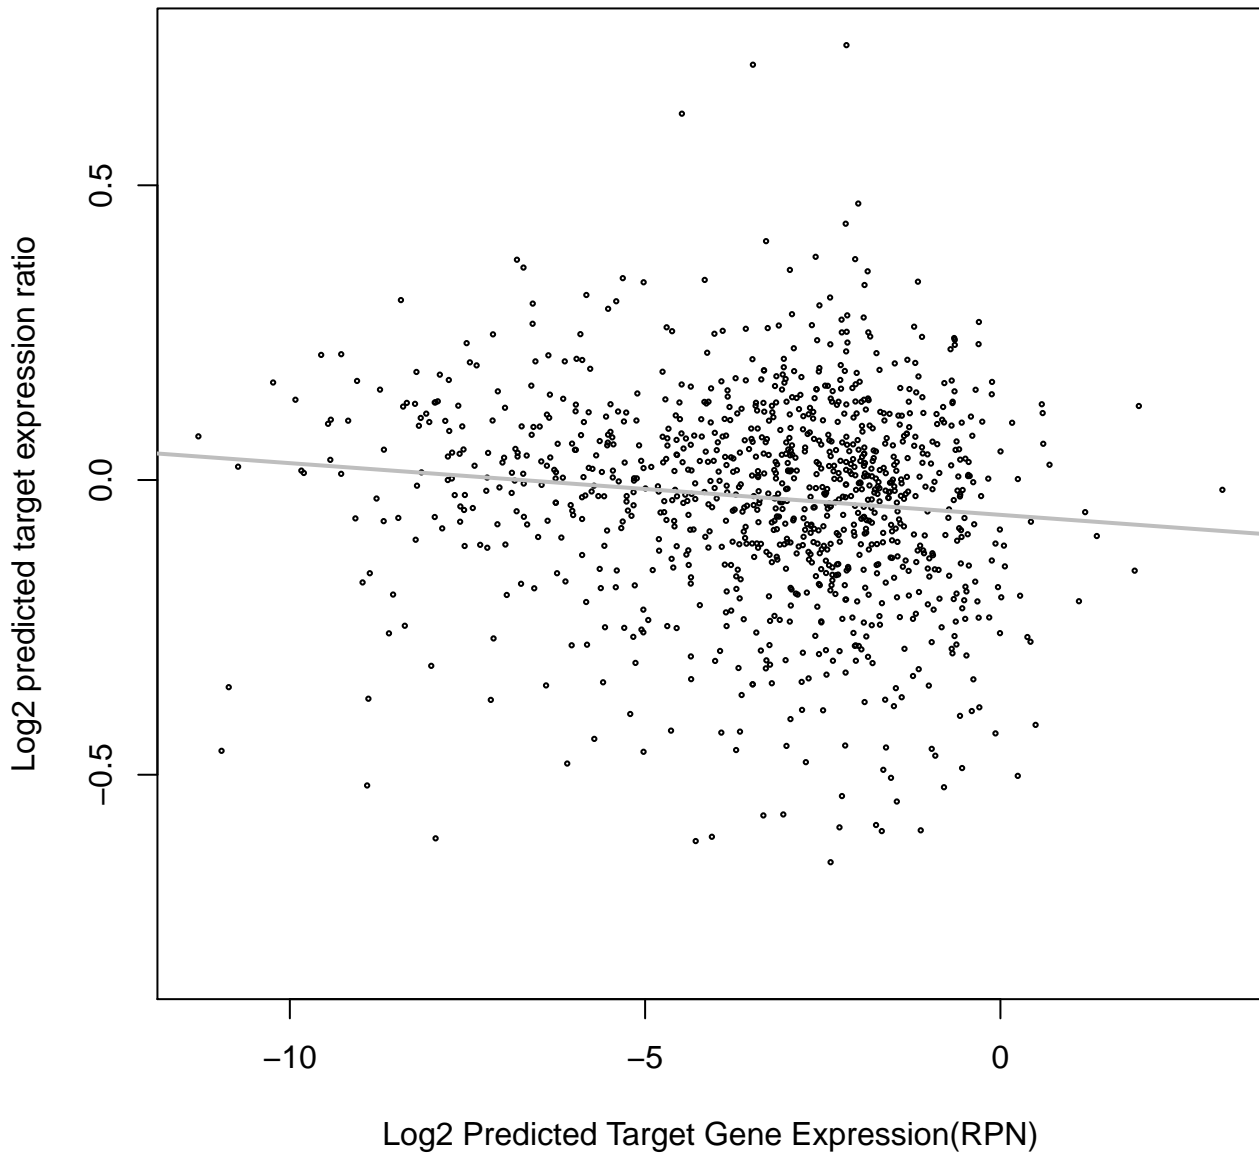

# kittler-145 – MAPK14-542

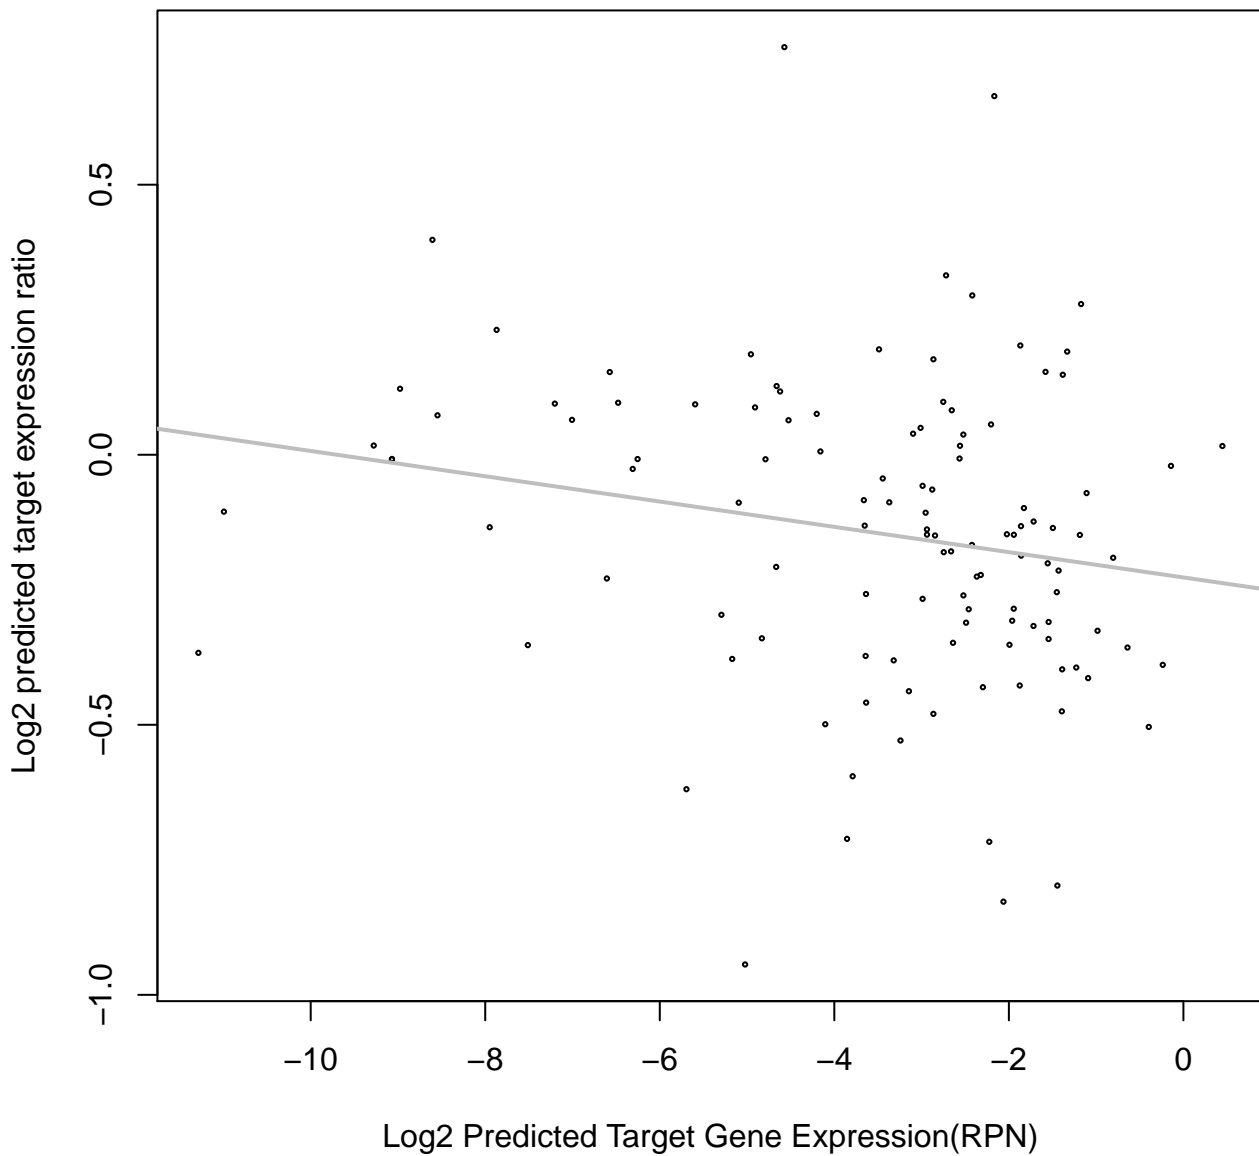

# kittler-146 - MAPK14-569

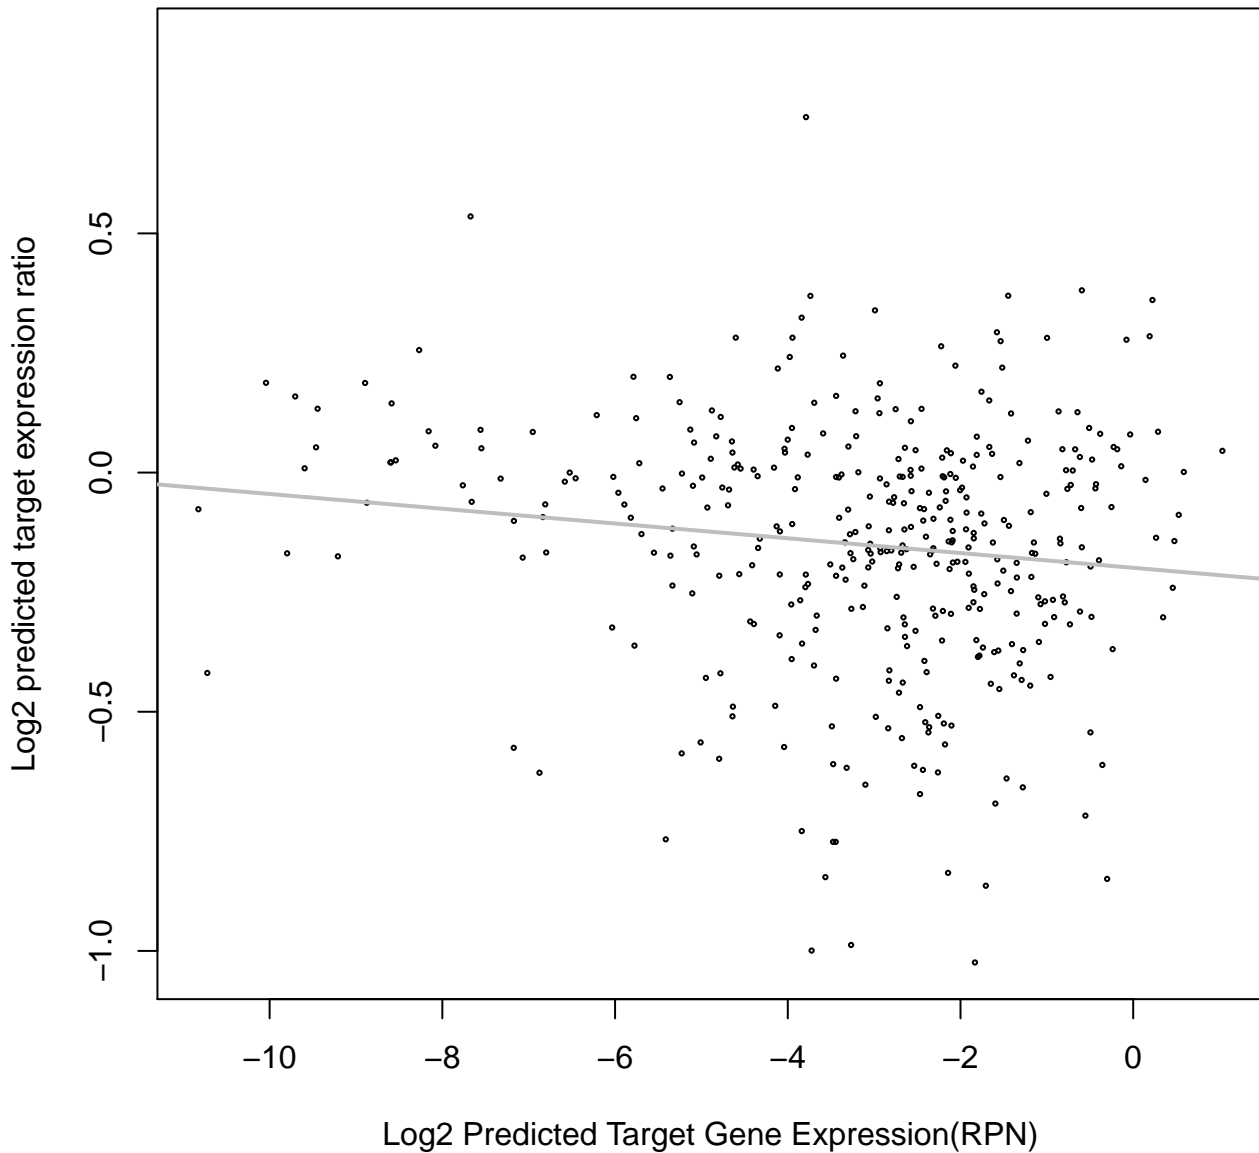

# kittler-147 – KIAA1387-1512

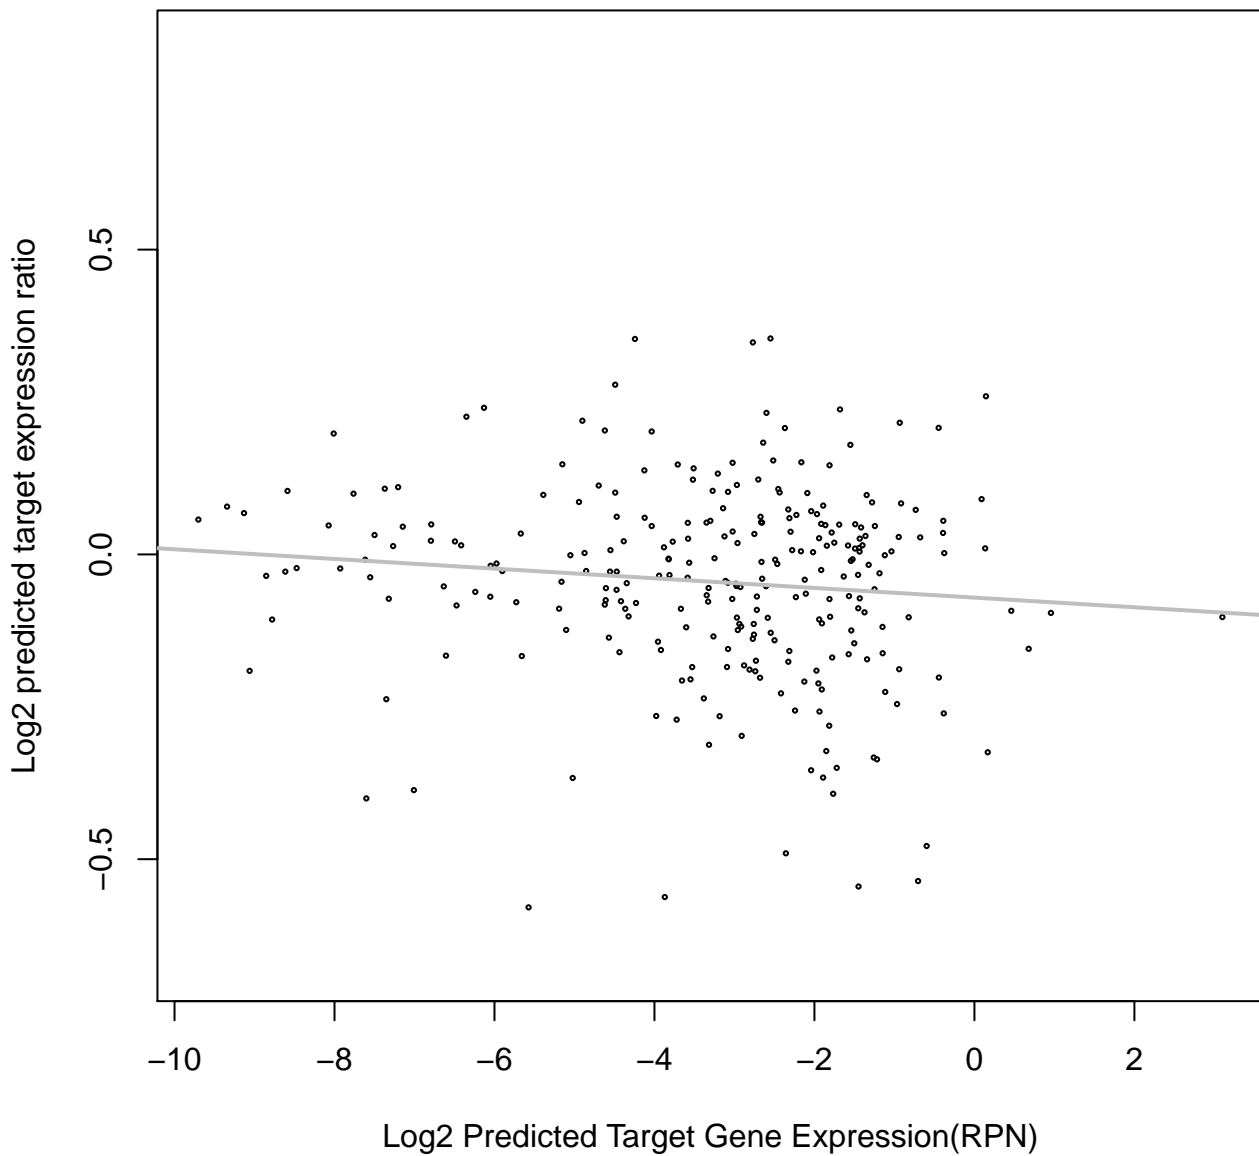

# kittler-148 – KIAA1387-2656

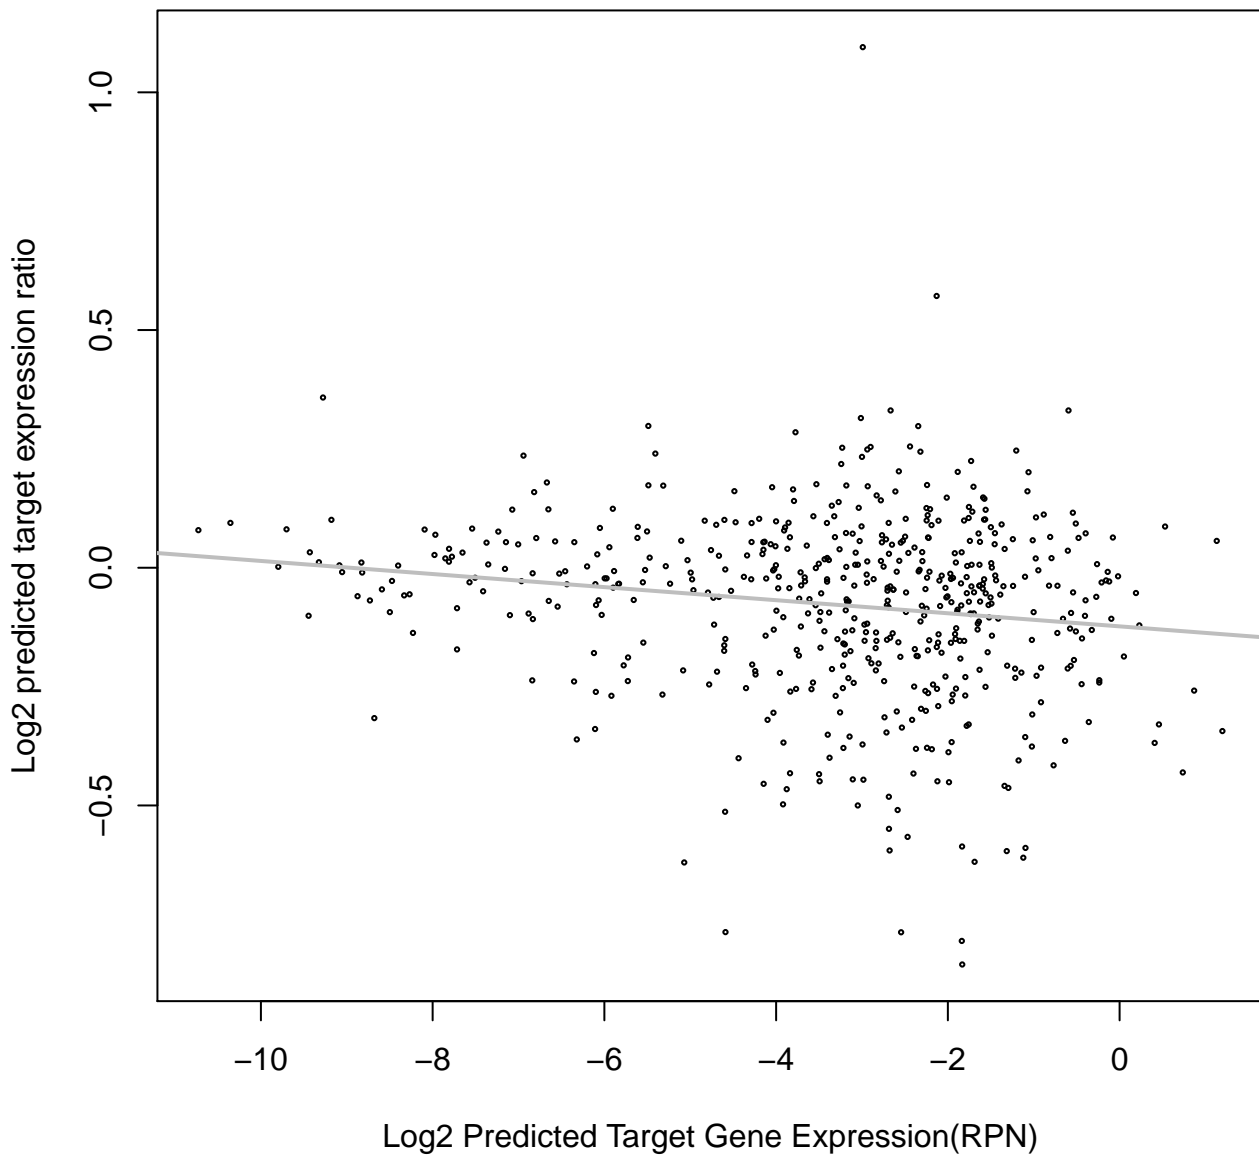



# kittler-149 – KIAA1387-2473

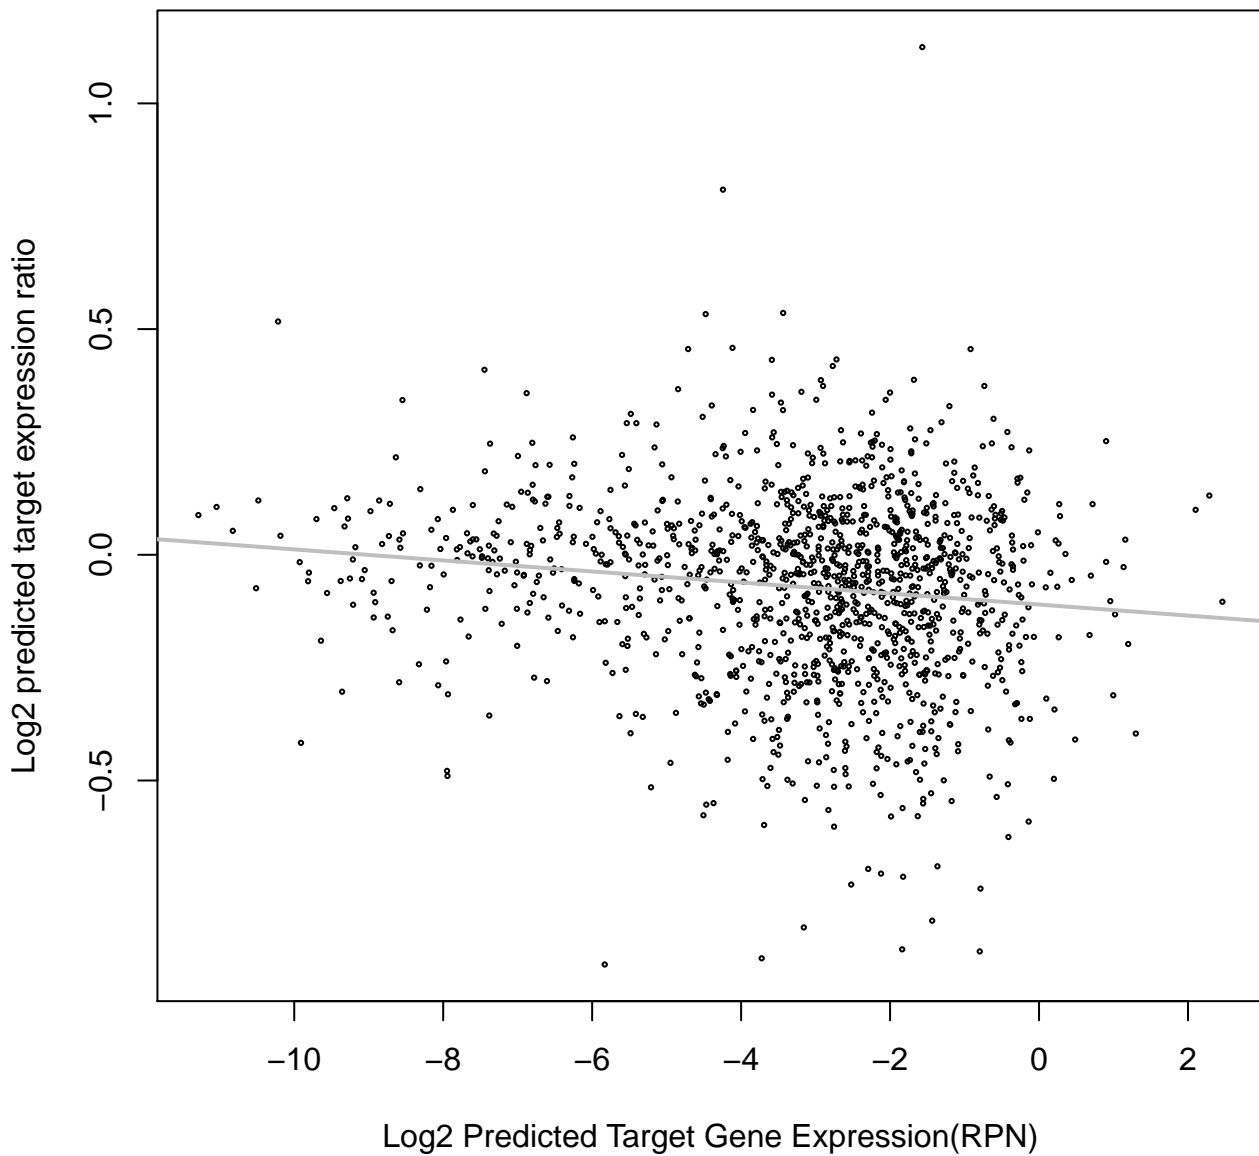

# kittler-150 - MAPK14-793



# kittler-151 – MAPK14-542

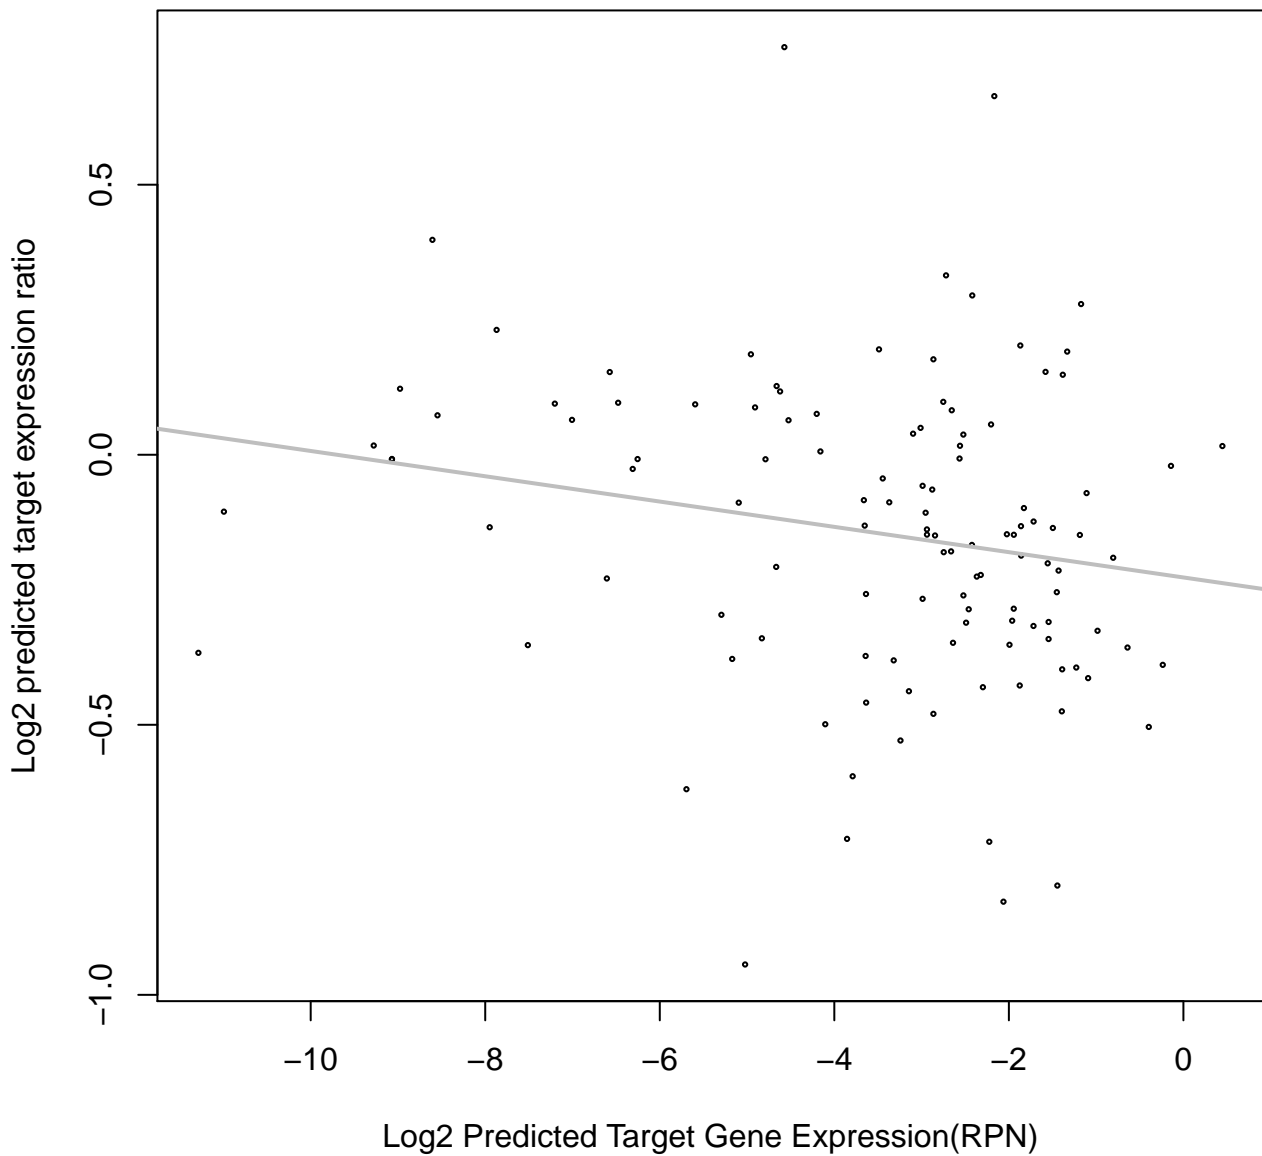

# kittler-152 - MAPK14-569

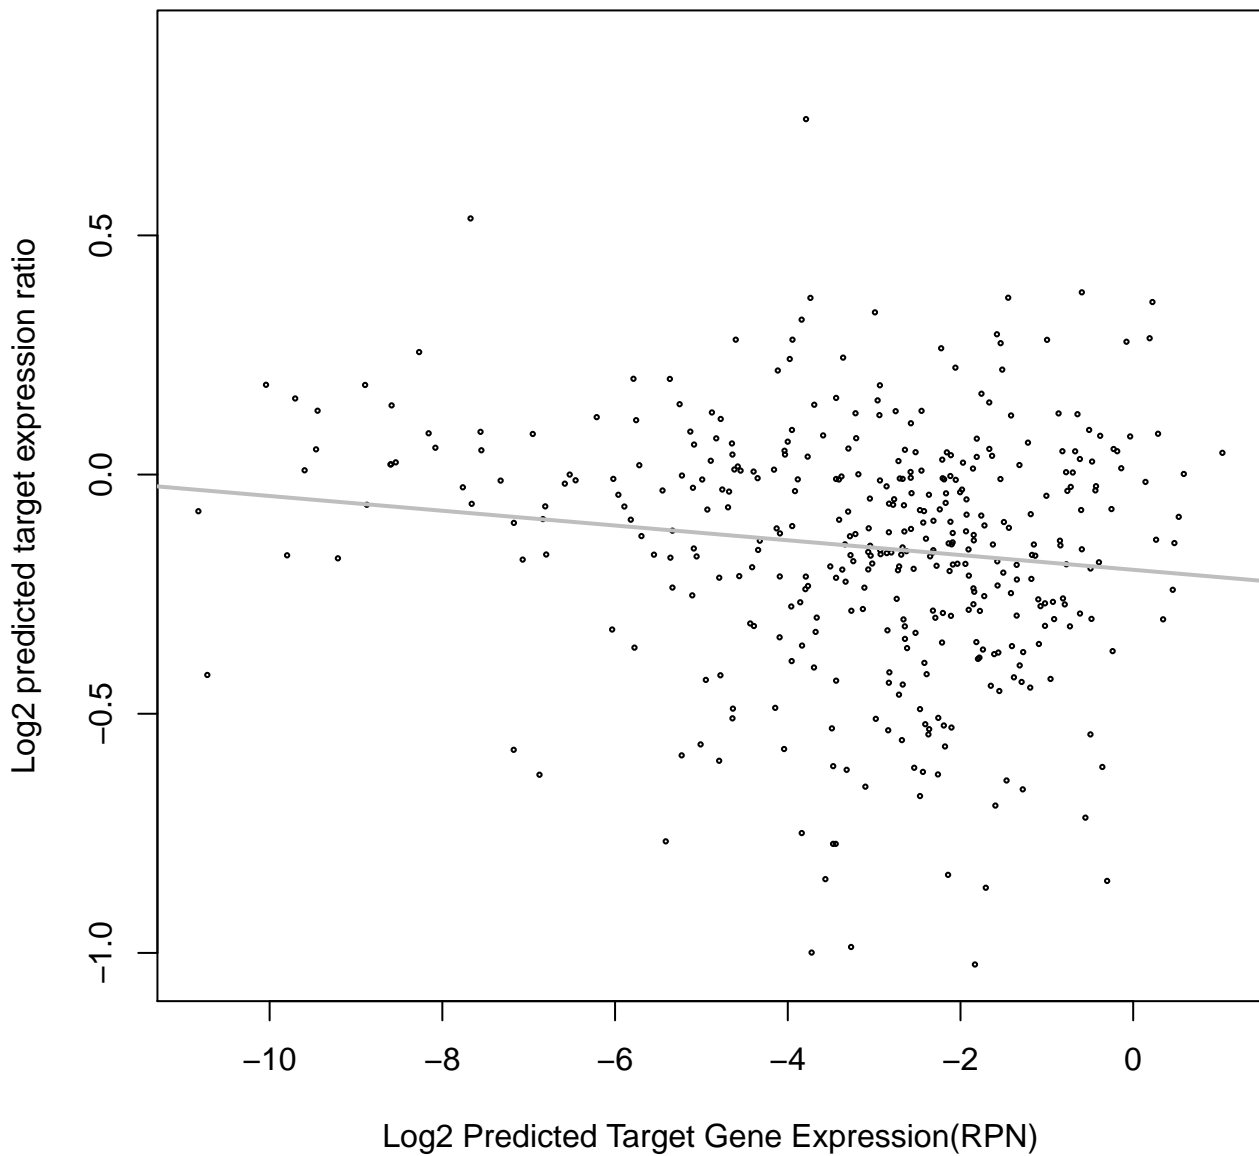

# kittler-153 – KIAA1387-1512



# kittler-154 – KIAA1387-2656

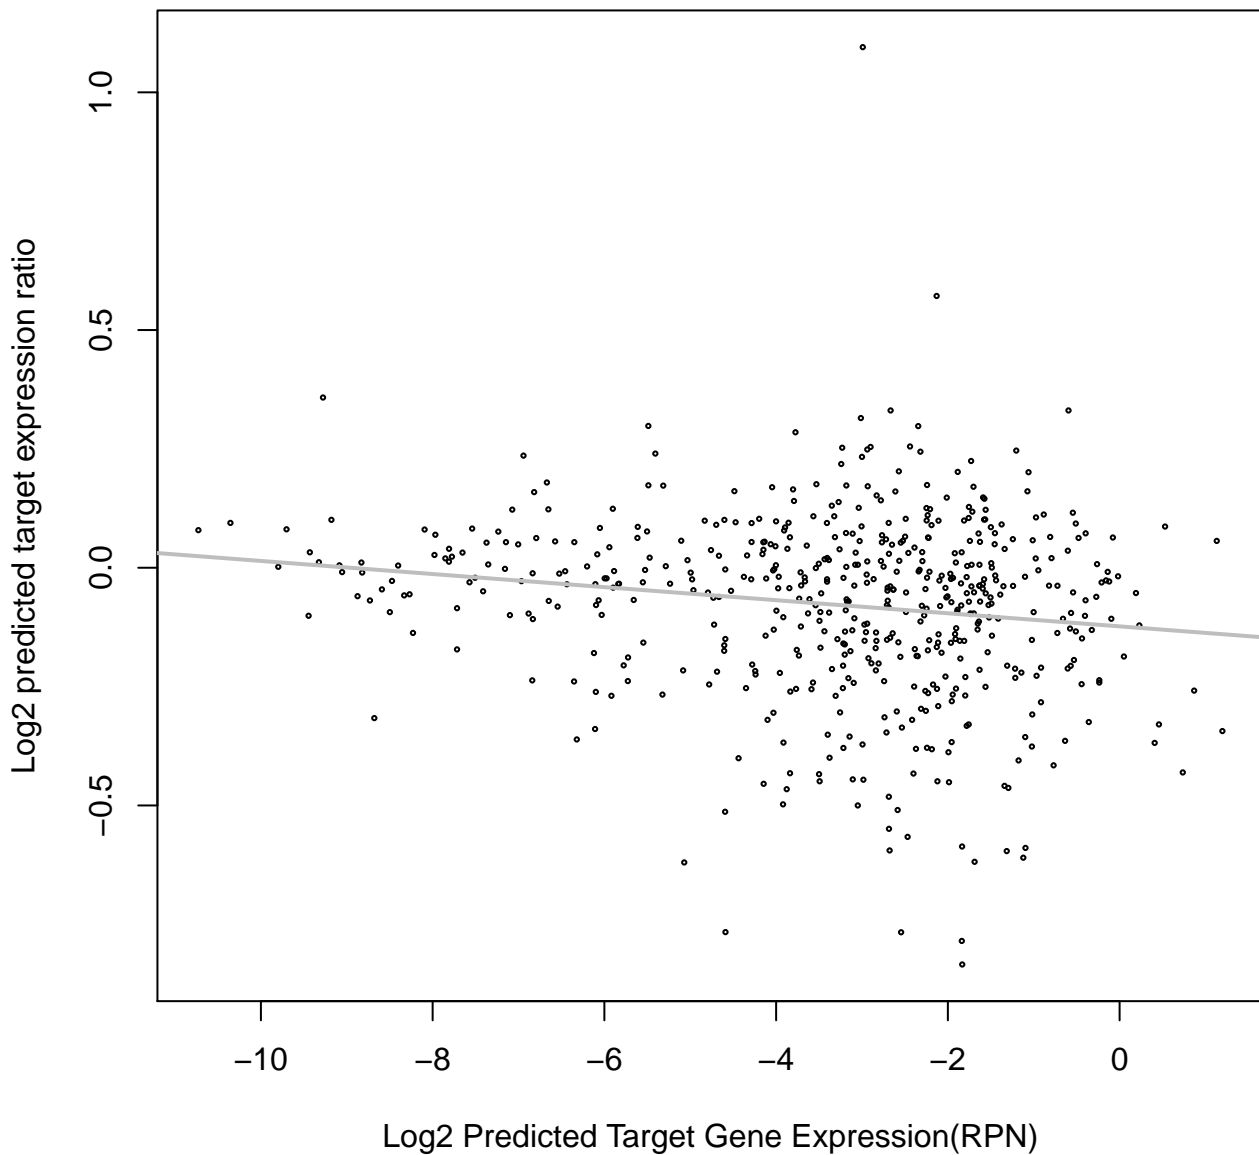

# kittler-155 - KIAA1387-2473



# lim.12-76 - miR1

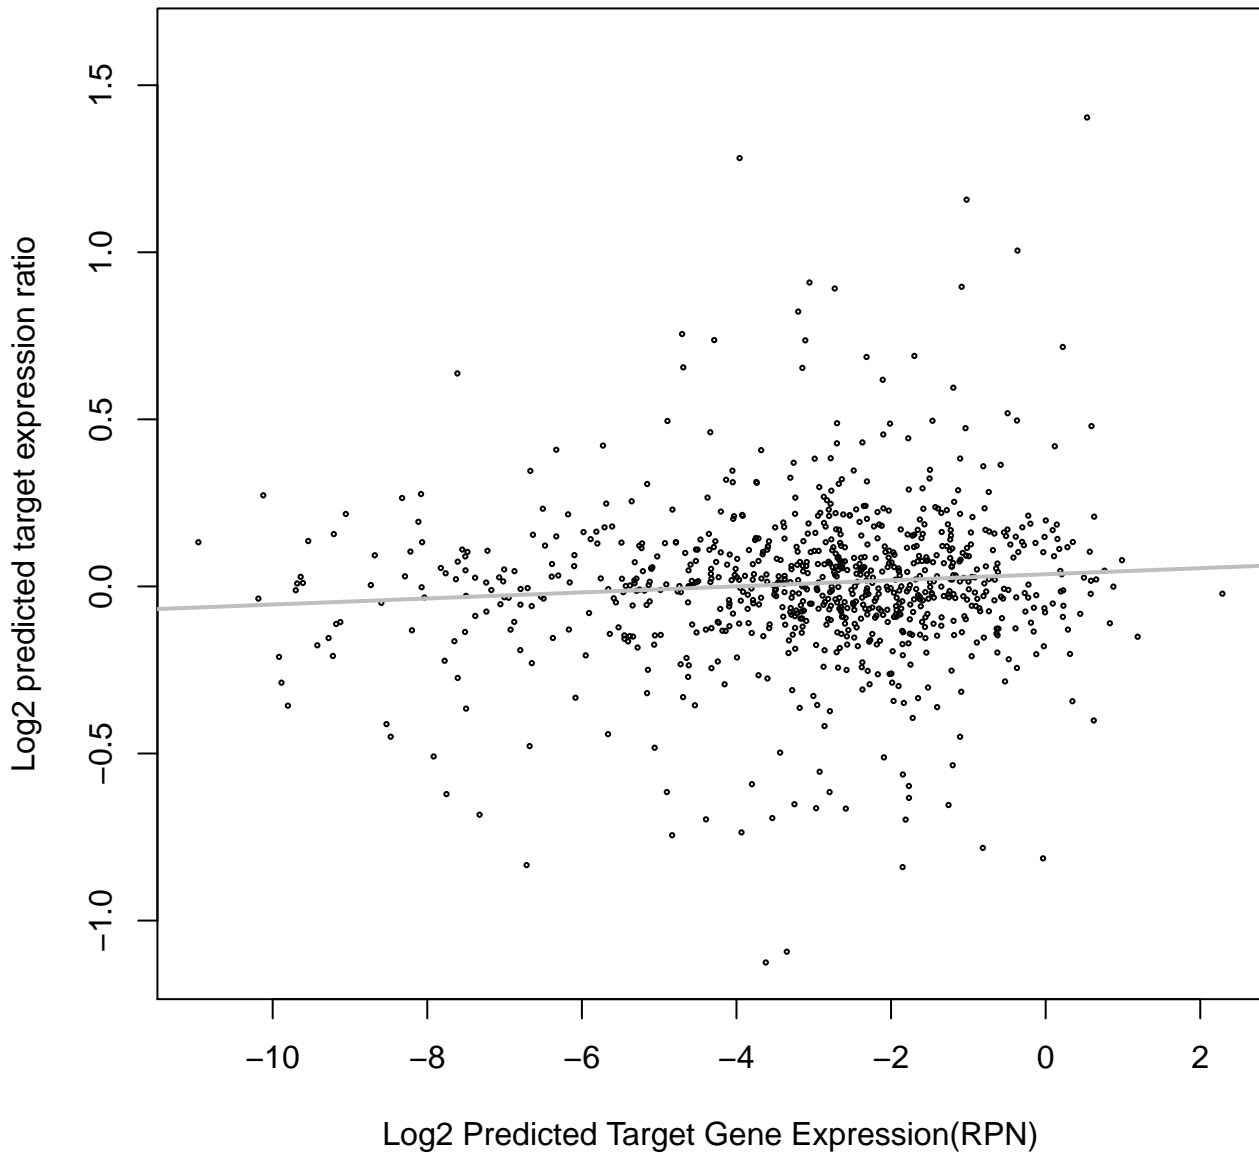



# lim.12-77 - miR124

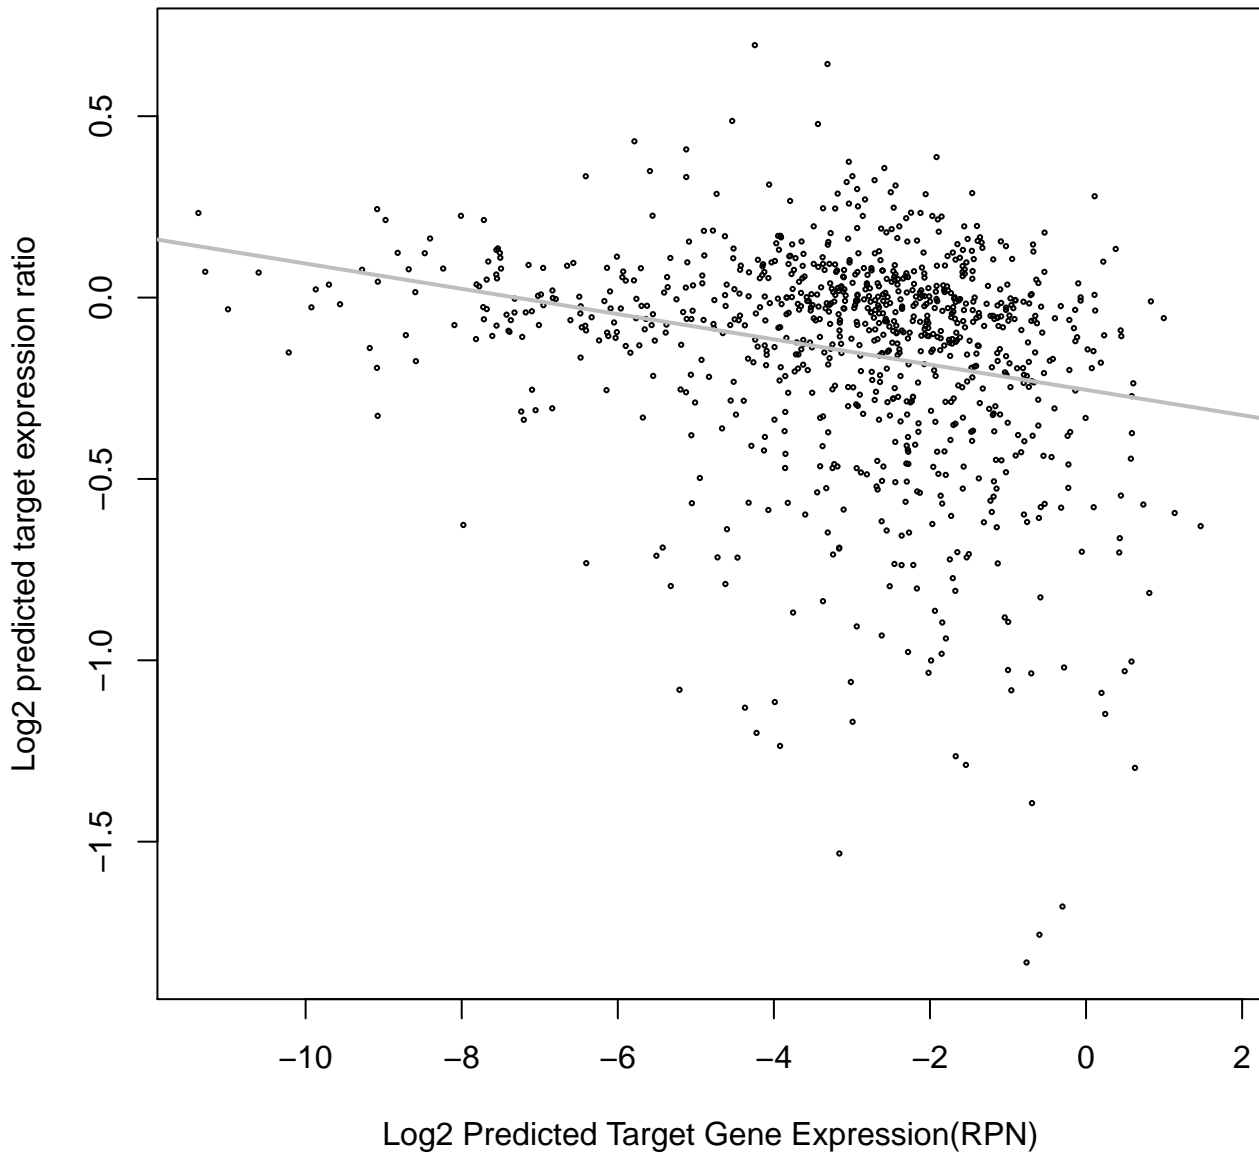

# lim.12-78 - chimiR1124

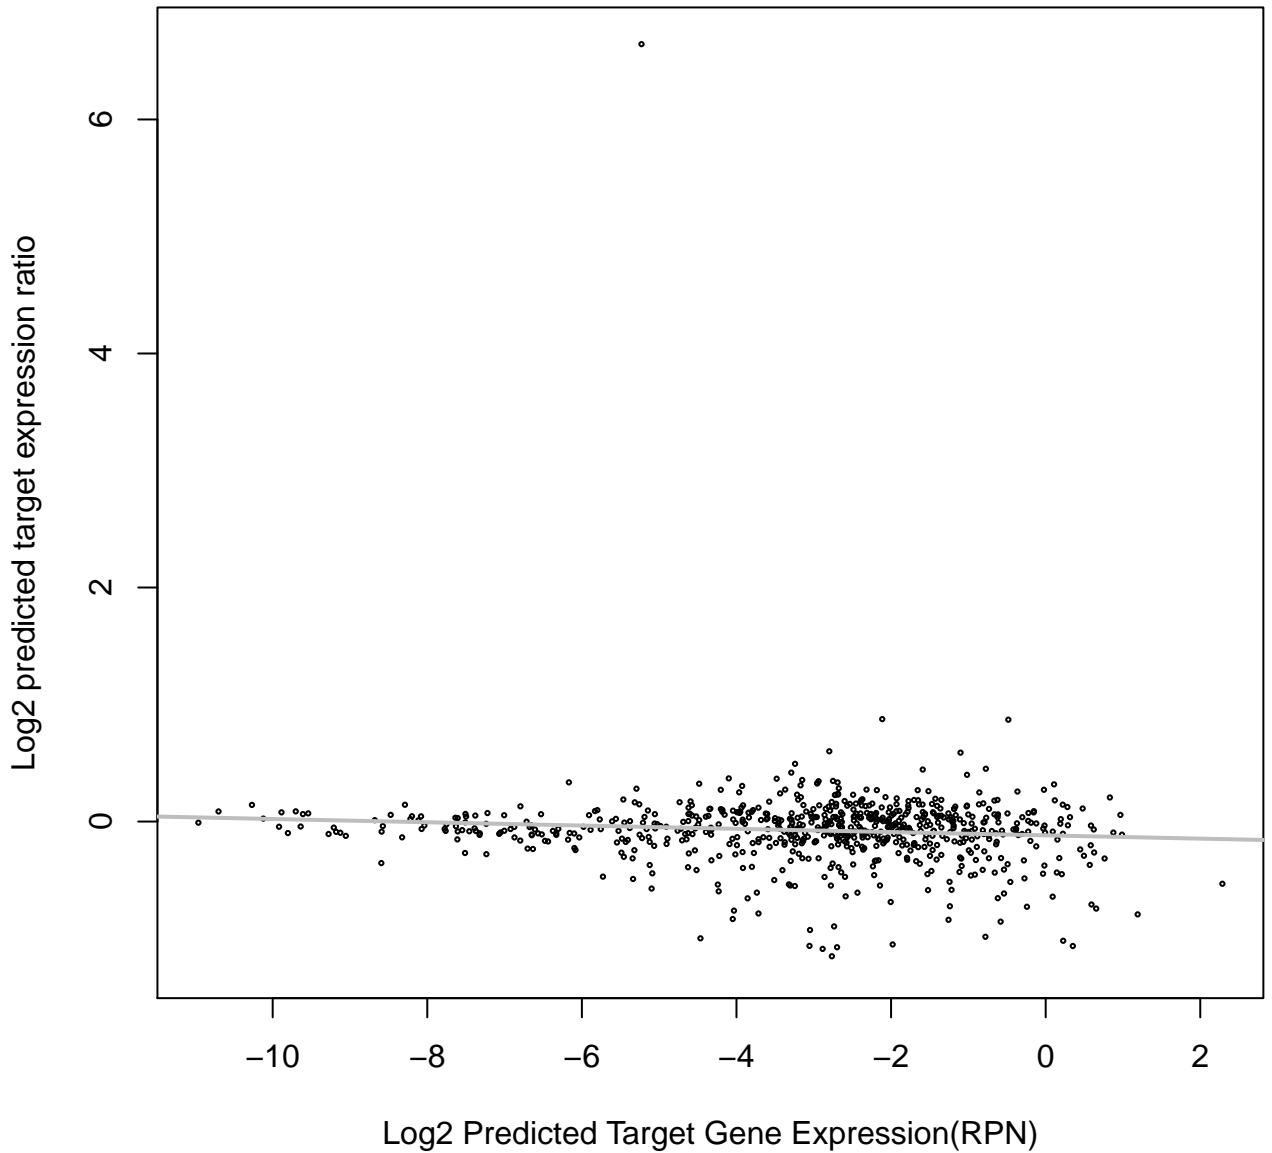

# lim.12-79 - chimiR1241

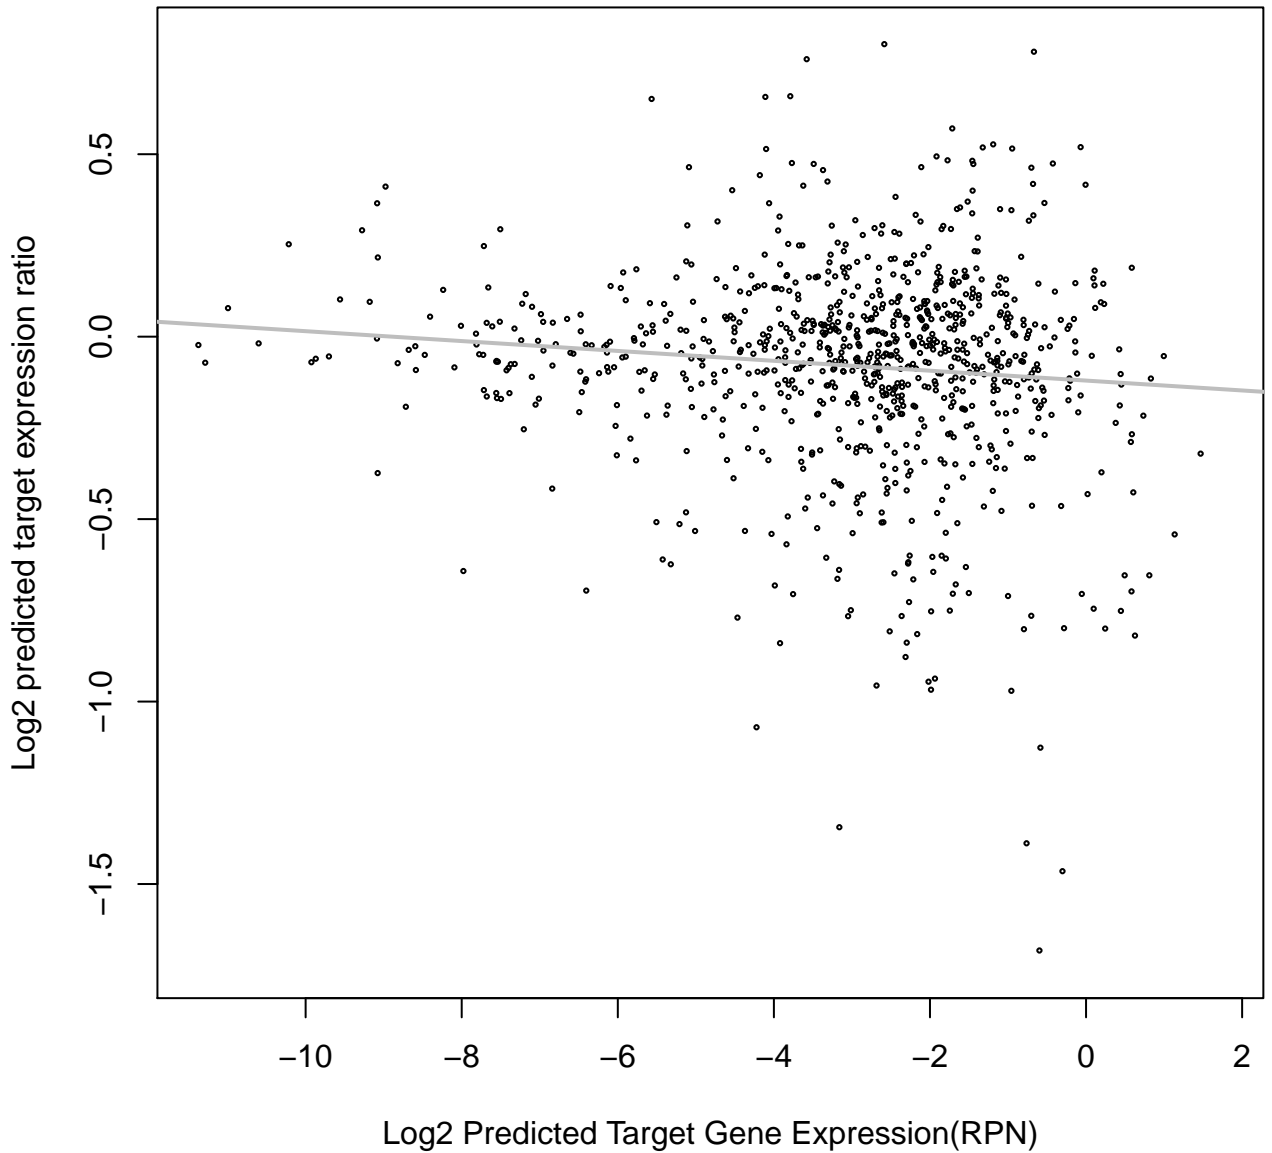

# lim.12-80 - miR124mut56

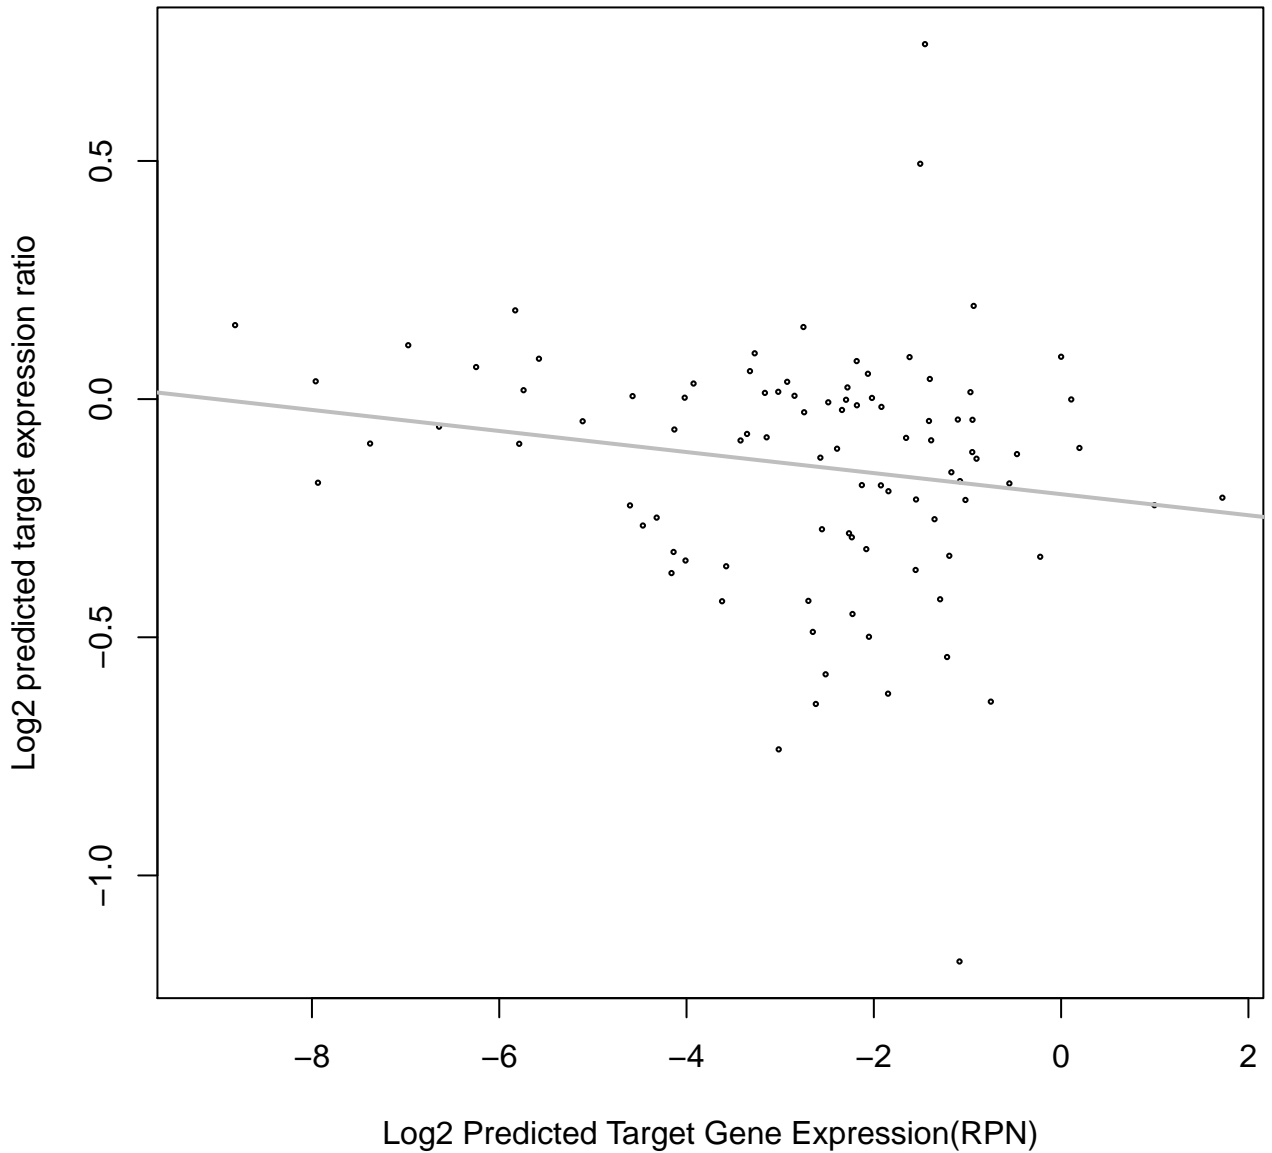

# lim.12-81 - miR124mut910

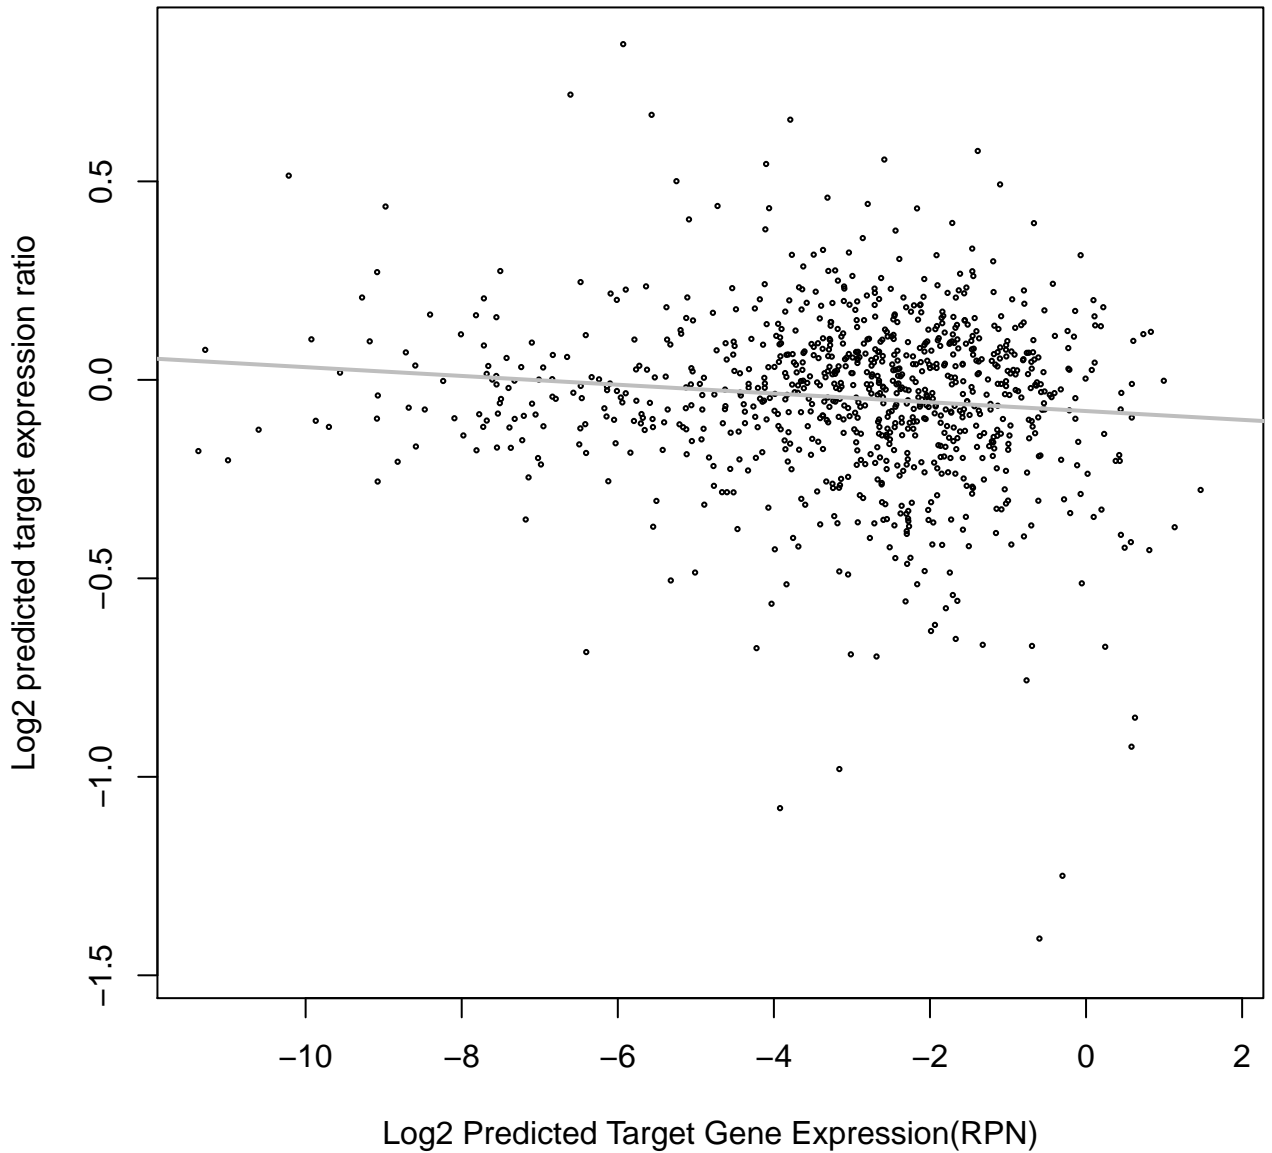

# lim-70 - miR1

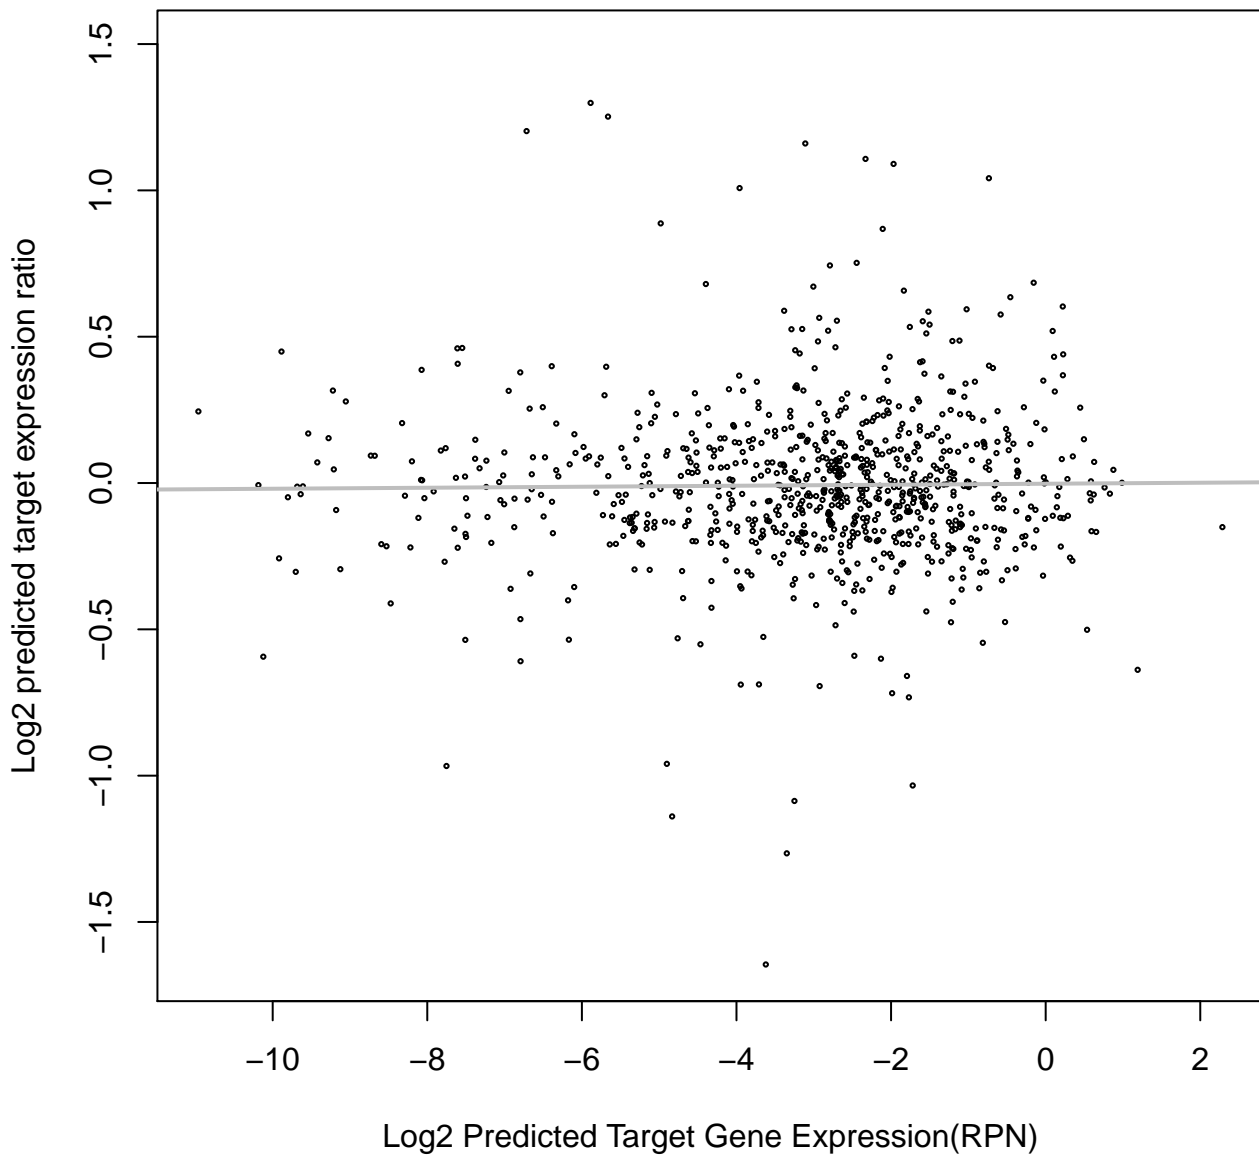

# lim-71 - miR124

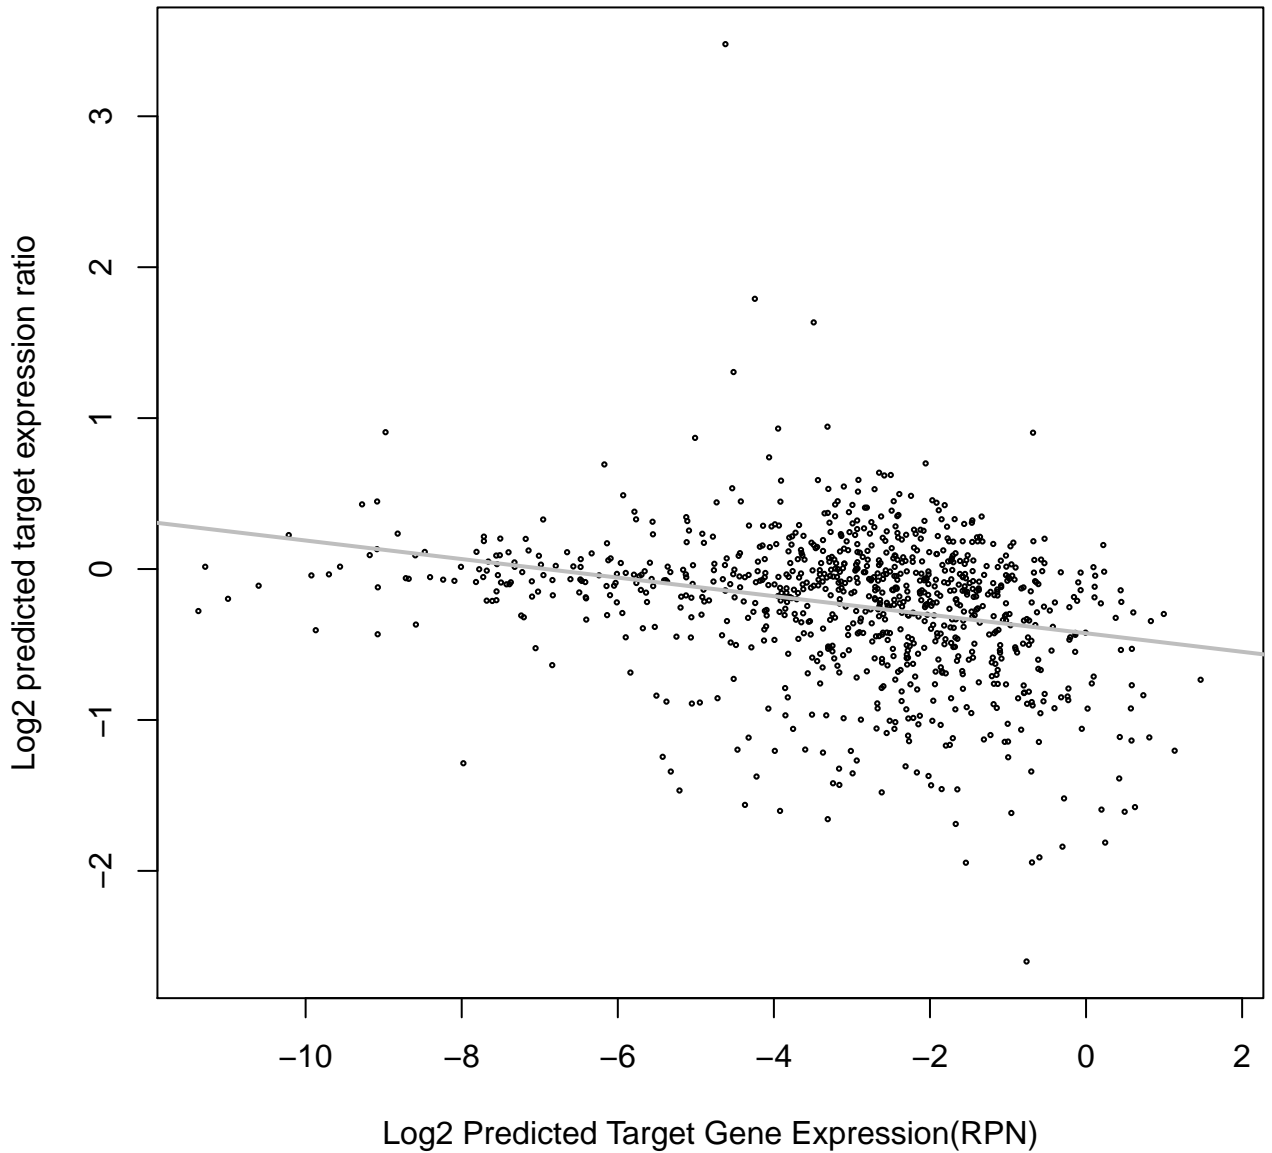

# lim-72 - chimiR1124

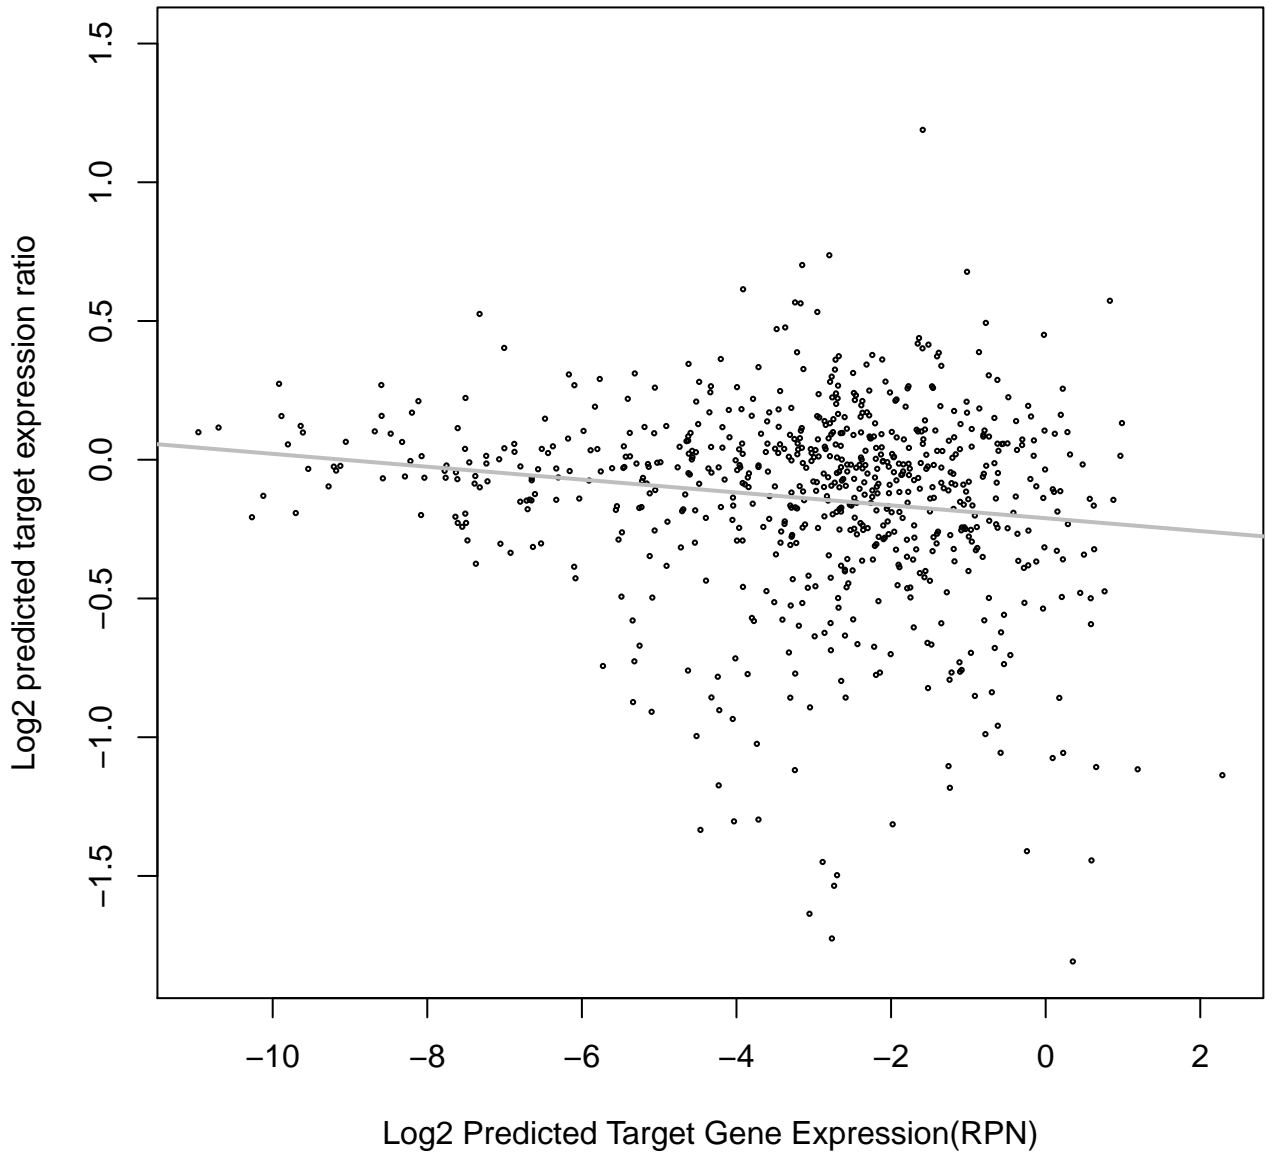



# lim-73 - chimiR1241

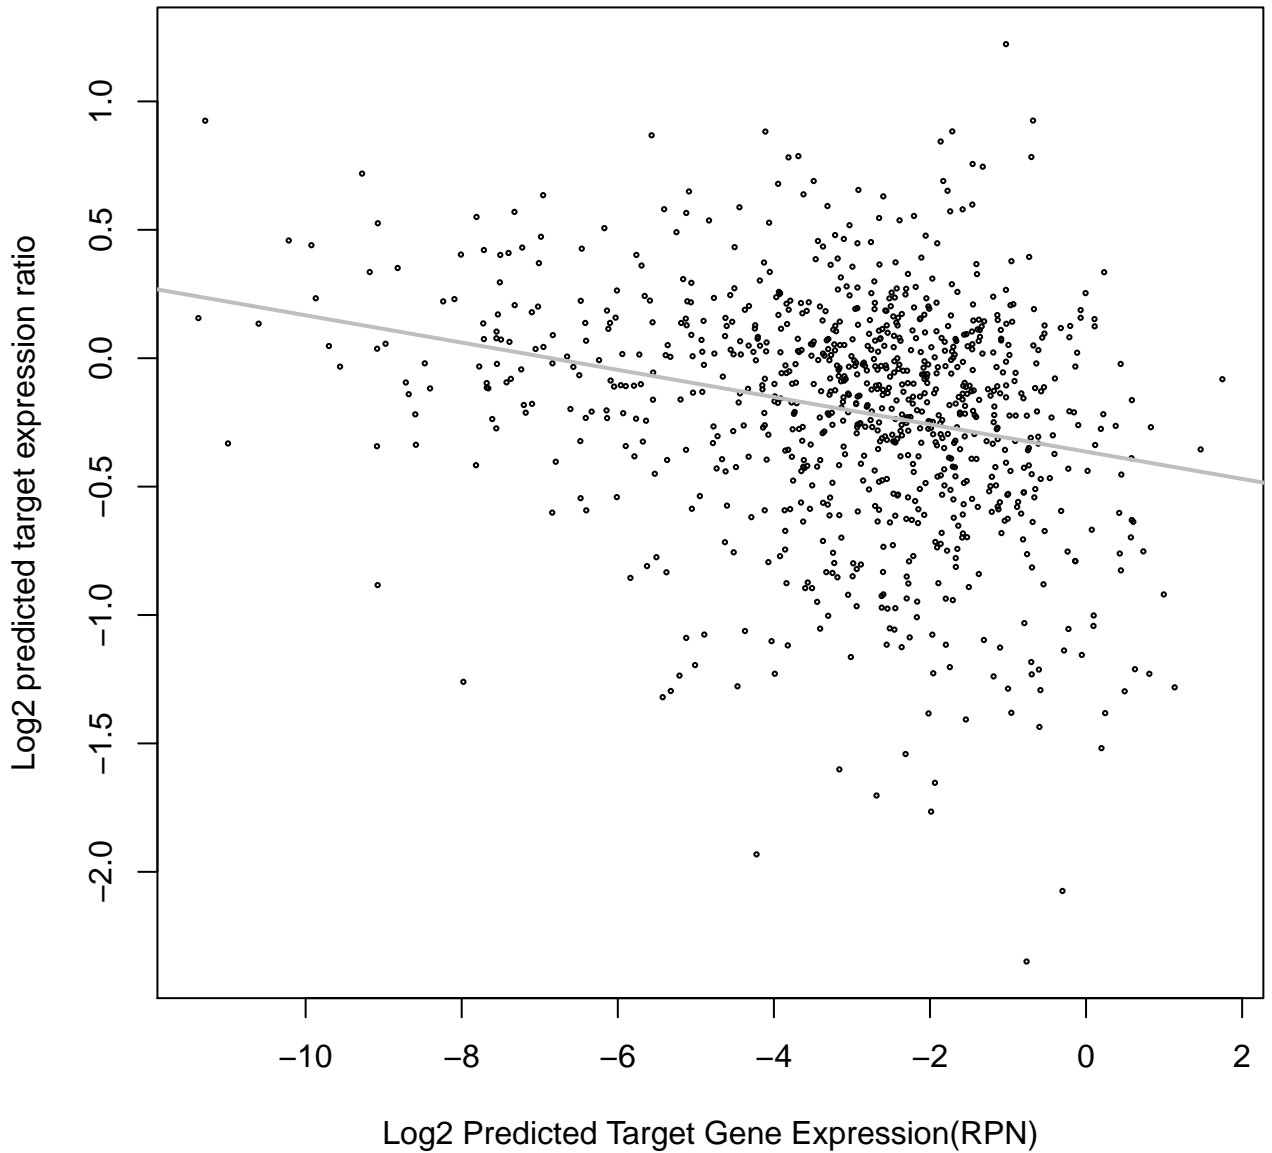

# lim-74 - miR124mut56

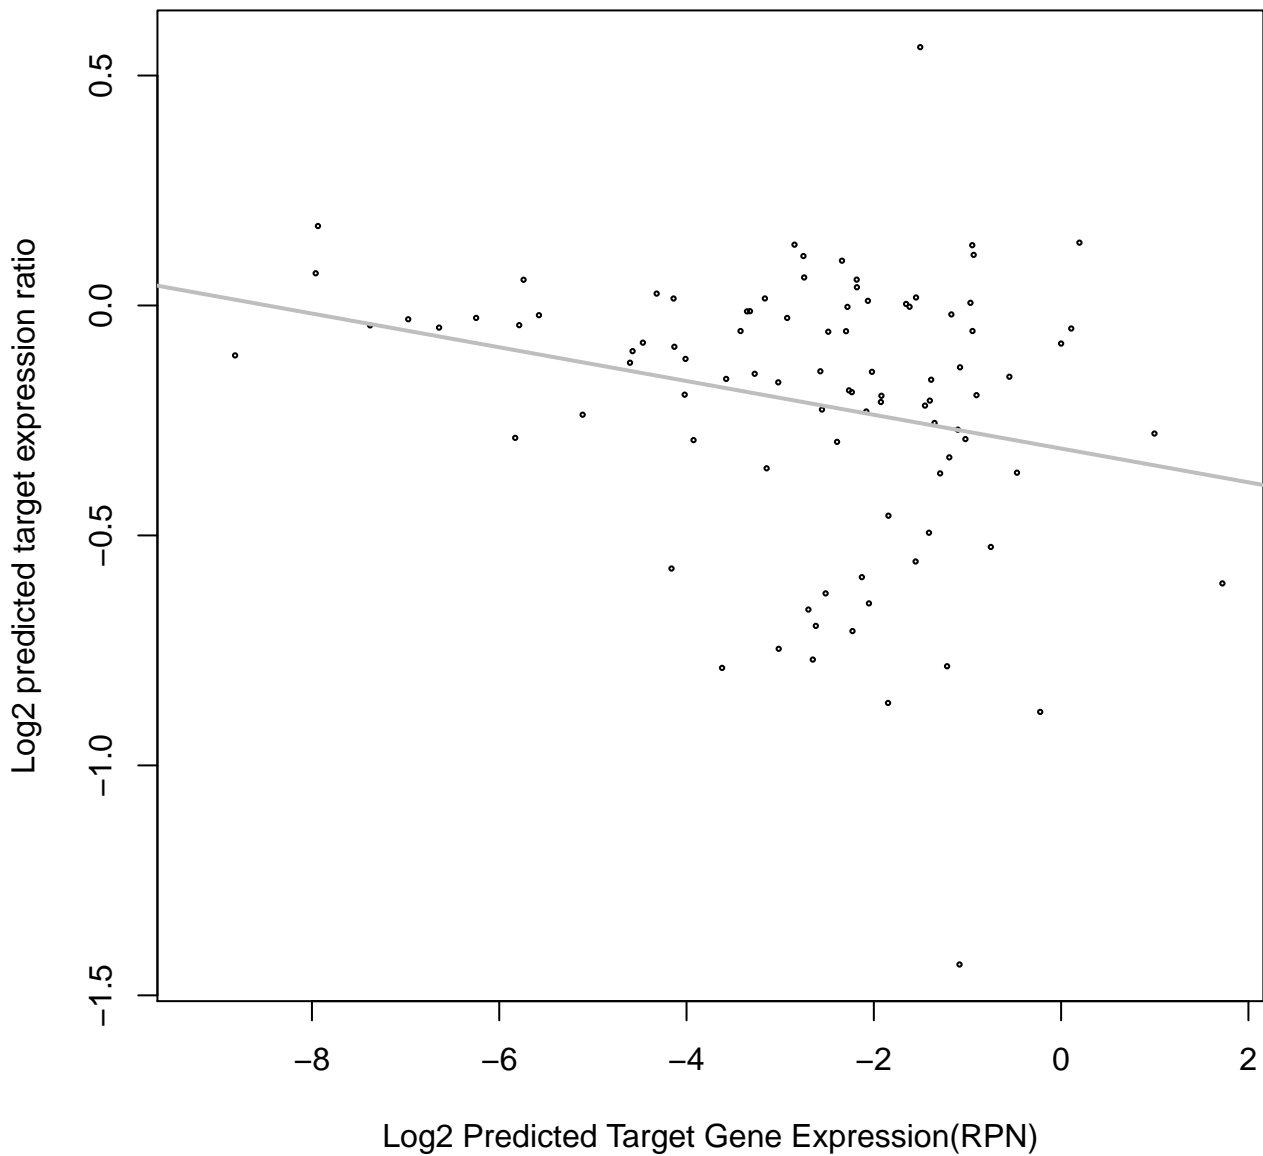

# lim-75 - miR124mut910

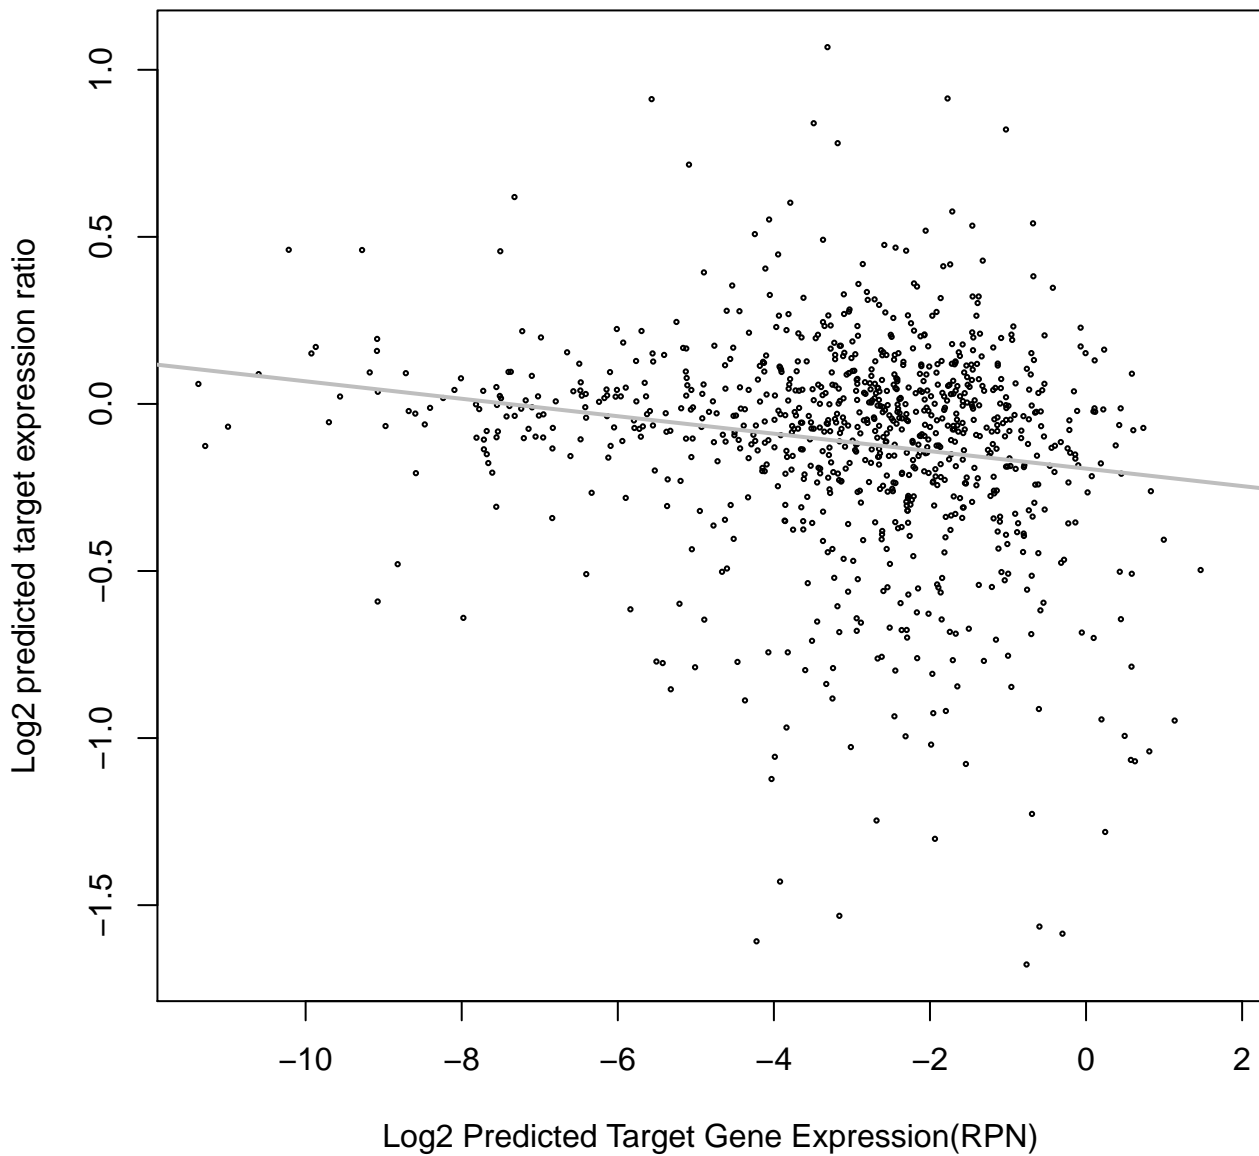

# linsley.hct-162 - miR16

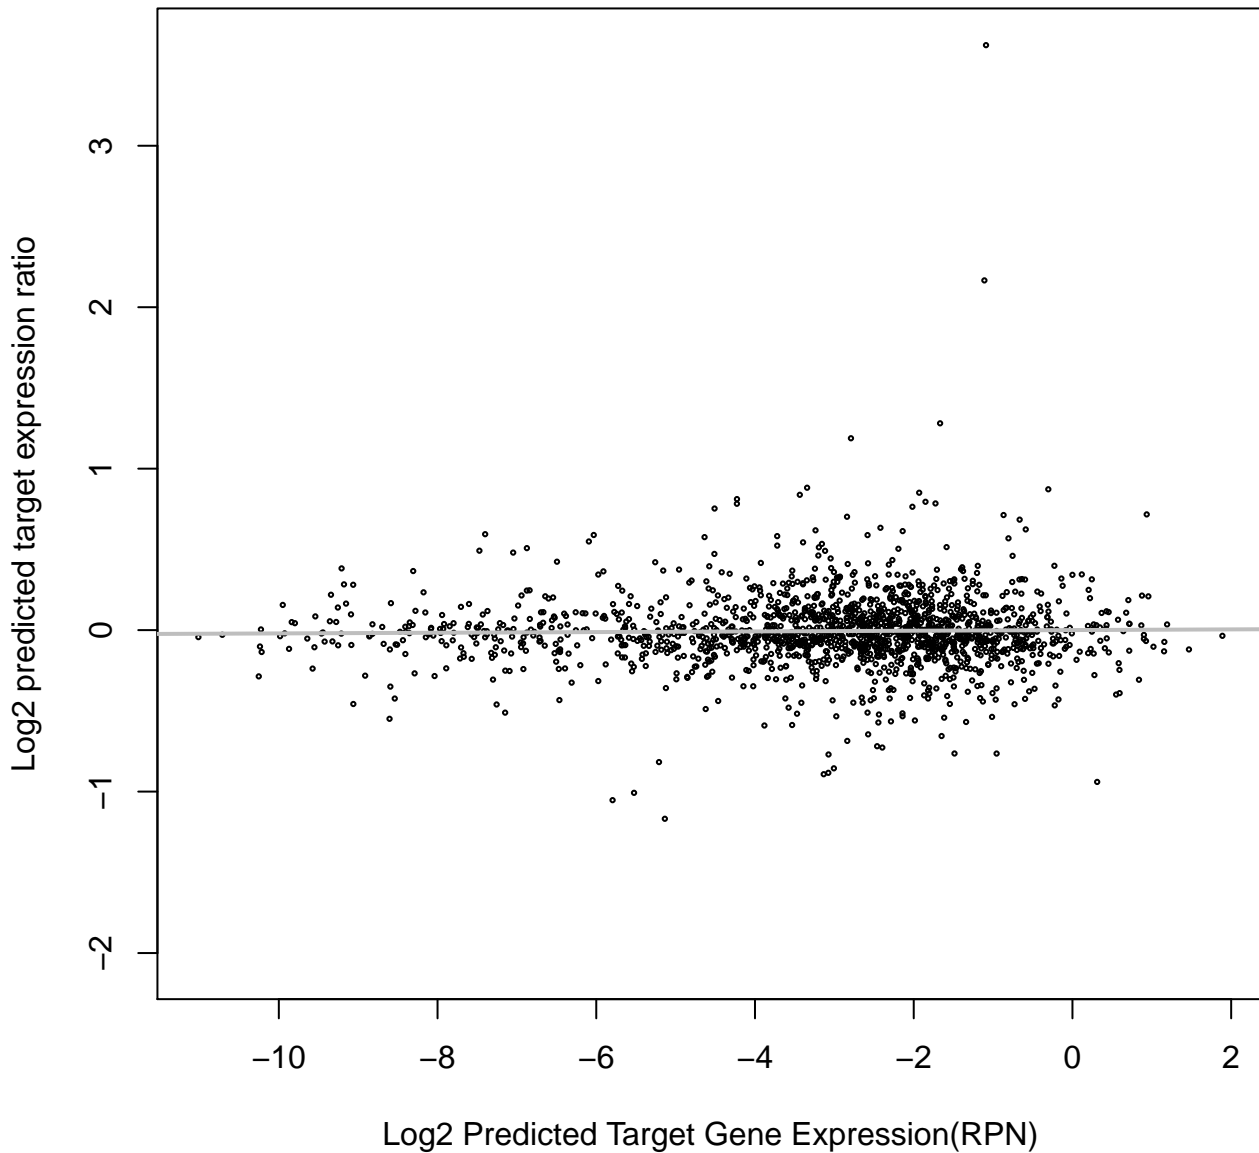

# linsley.hct-163 – miR15a

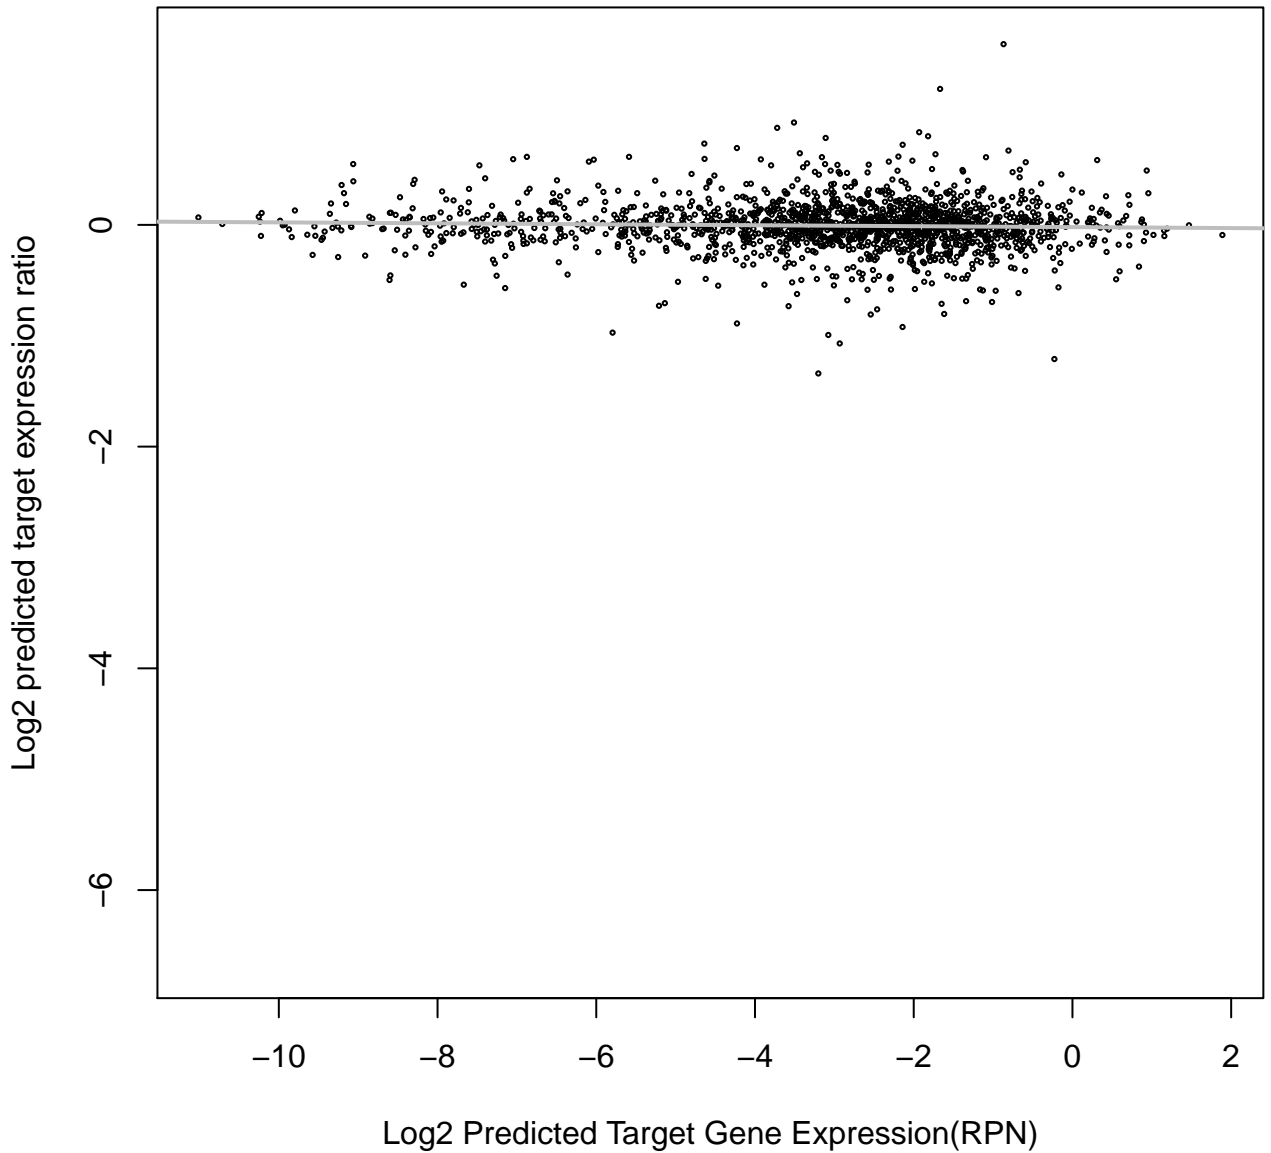

# linsley.hct-164 - miR106b

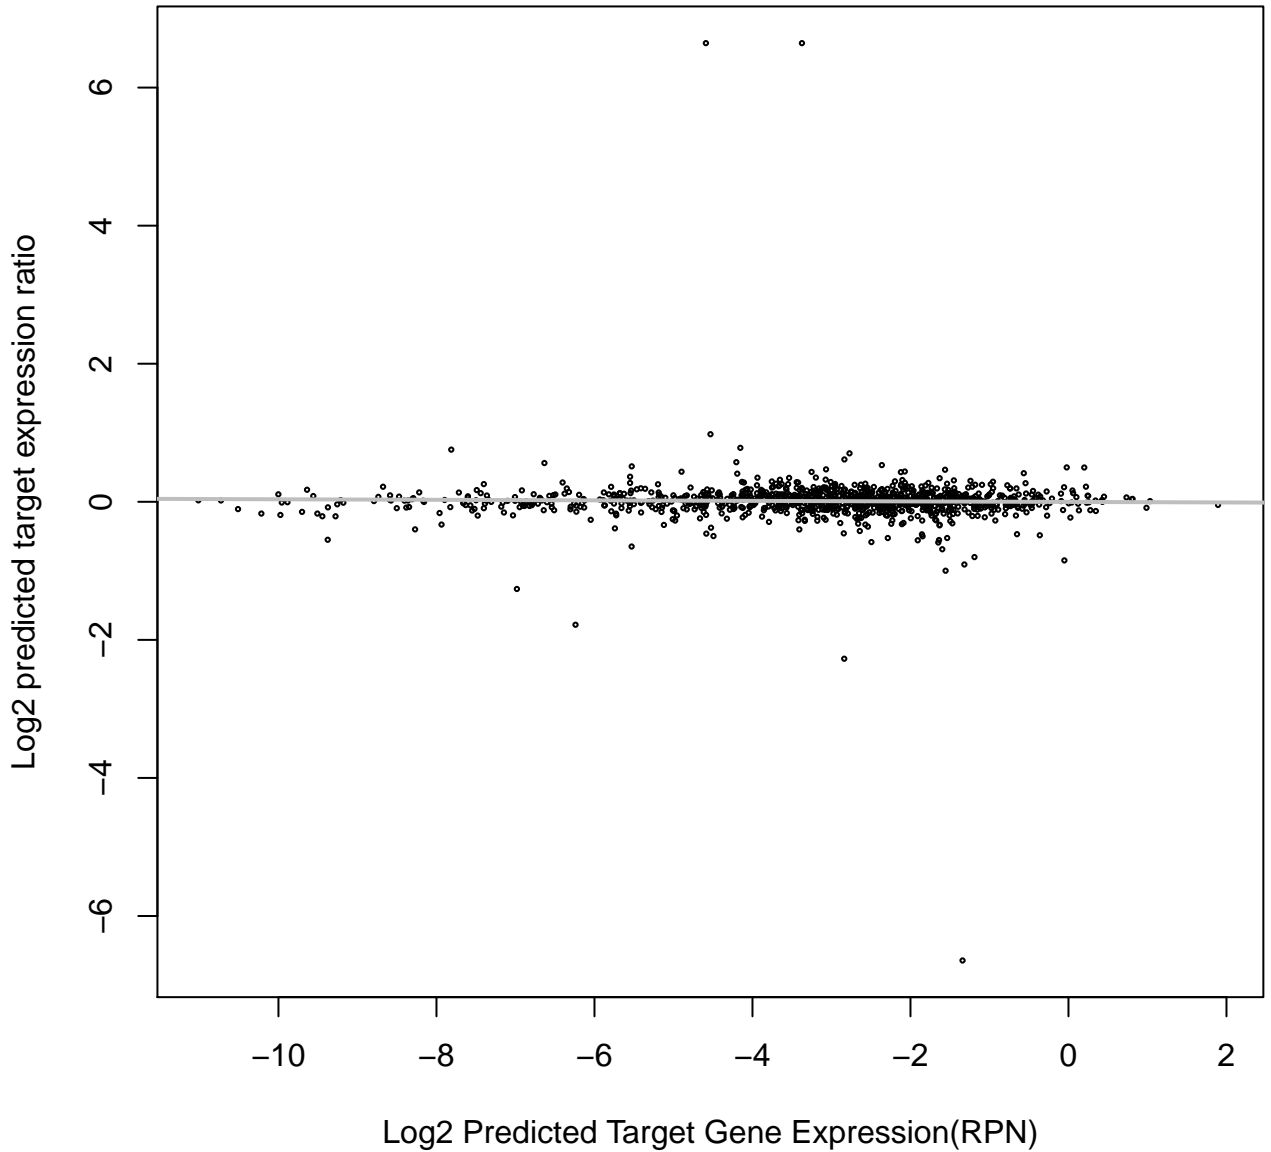

# linsley.hct-165 - miR15a

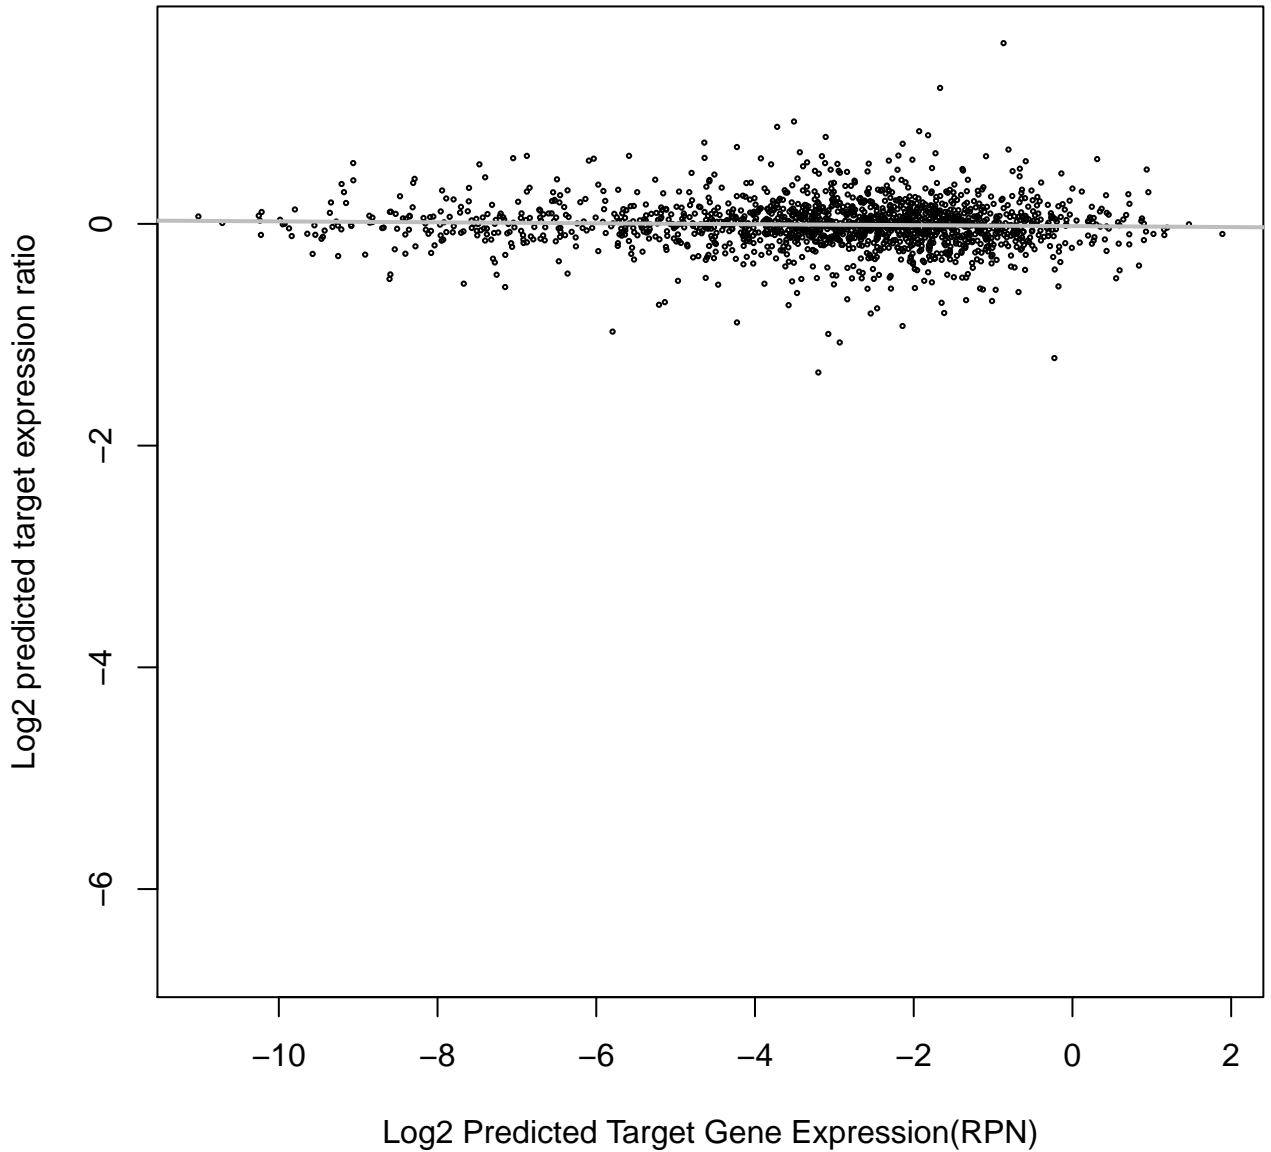

# linsley.hct-166 - miR16





# linsley.hct-167 - miR192

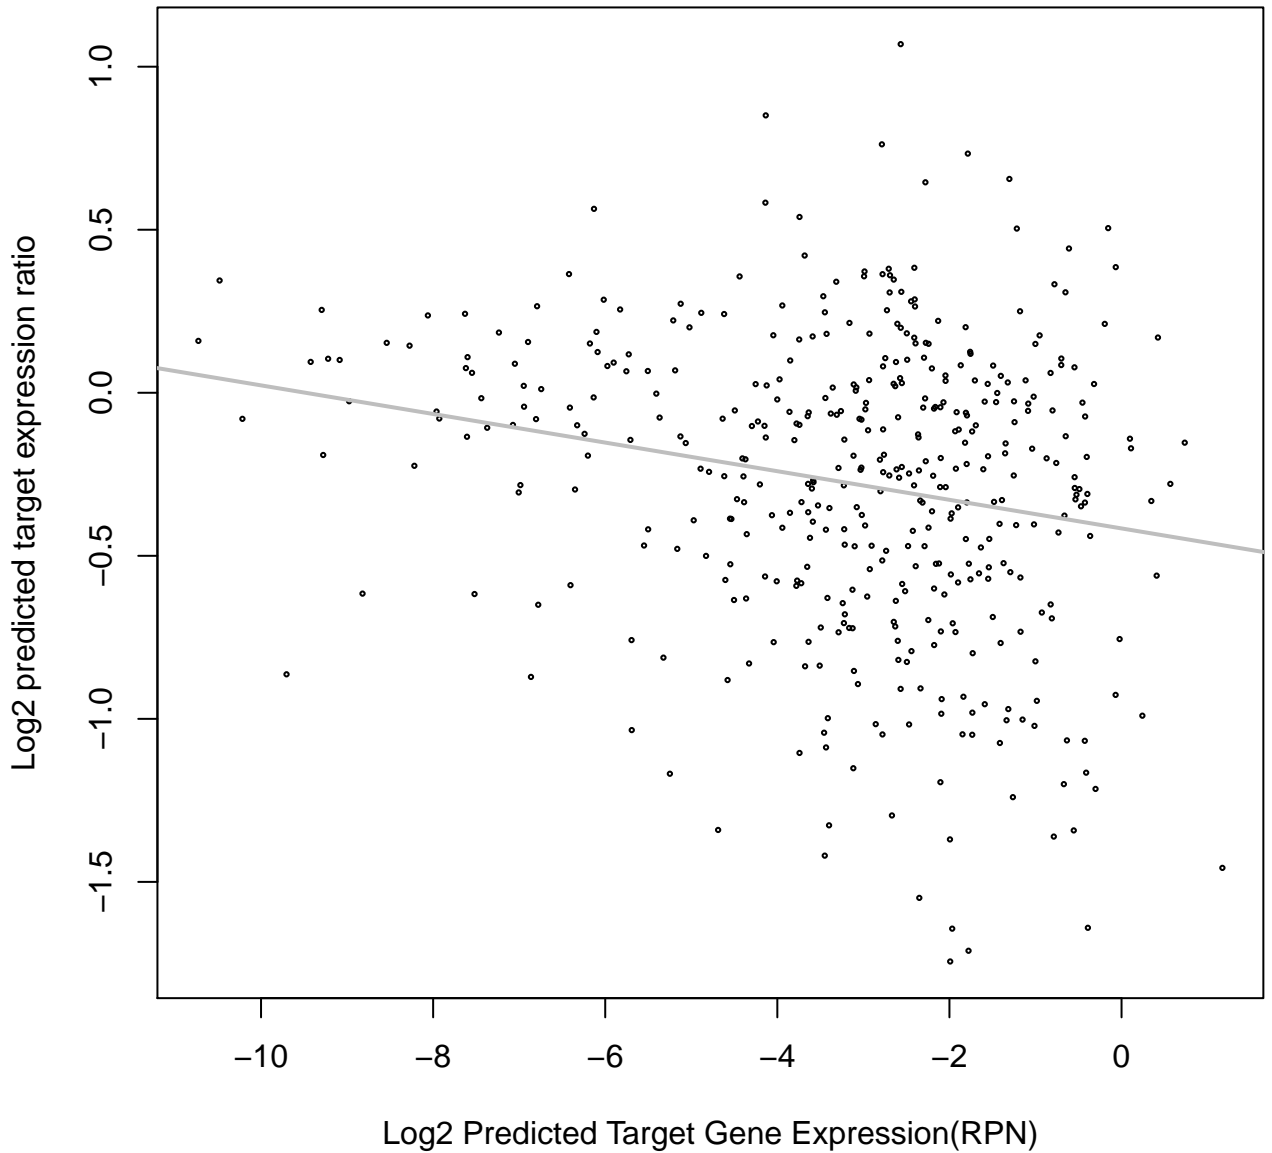

# linsley.hct-168 – miR215

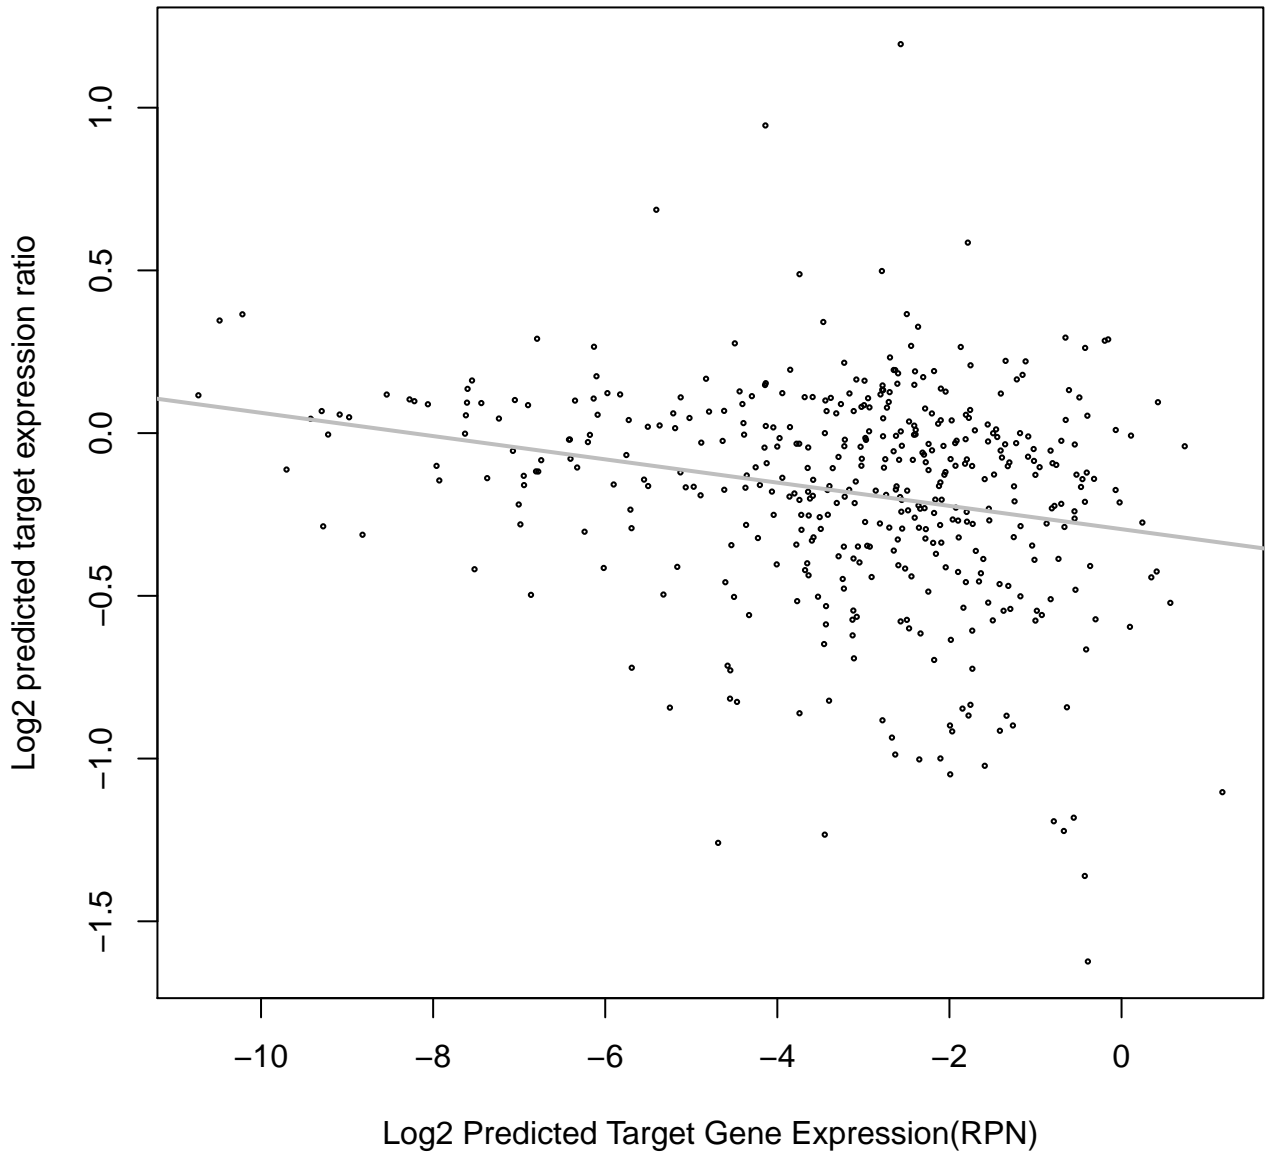

# linsley.hct-169 - miR17-5p

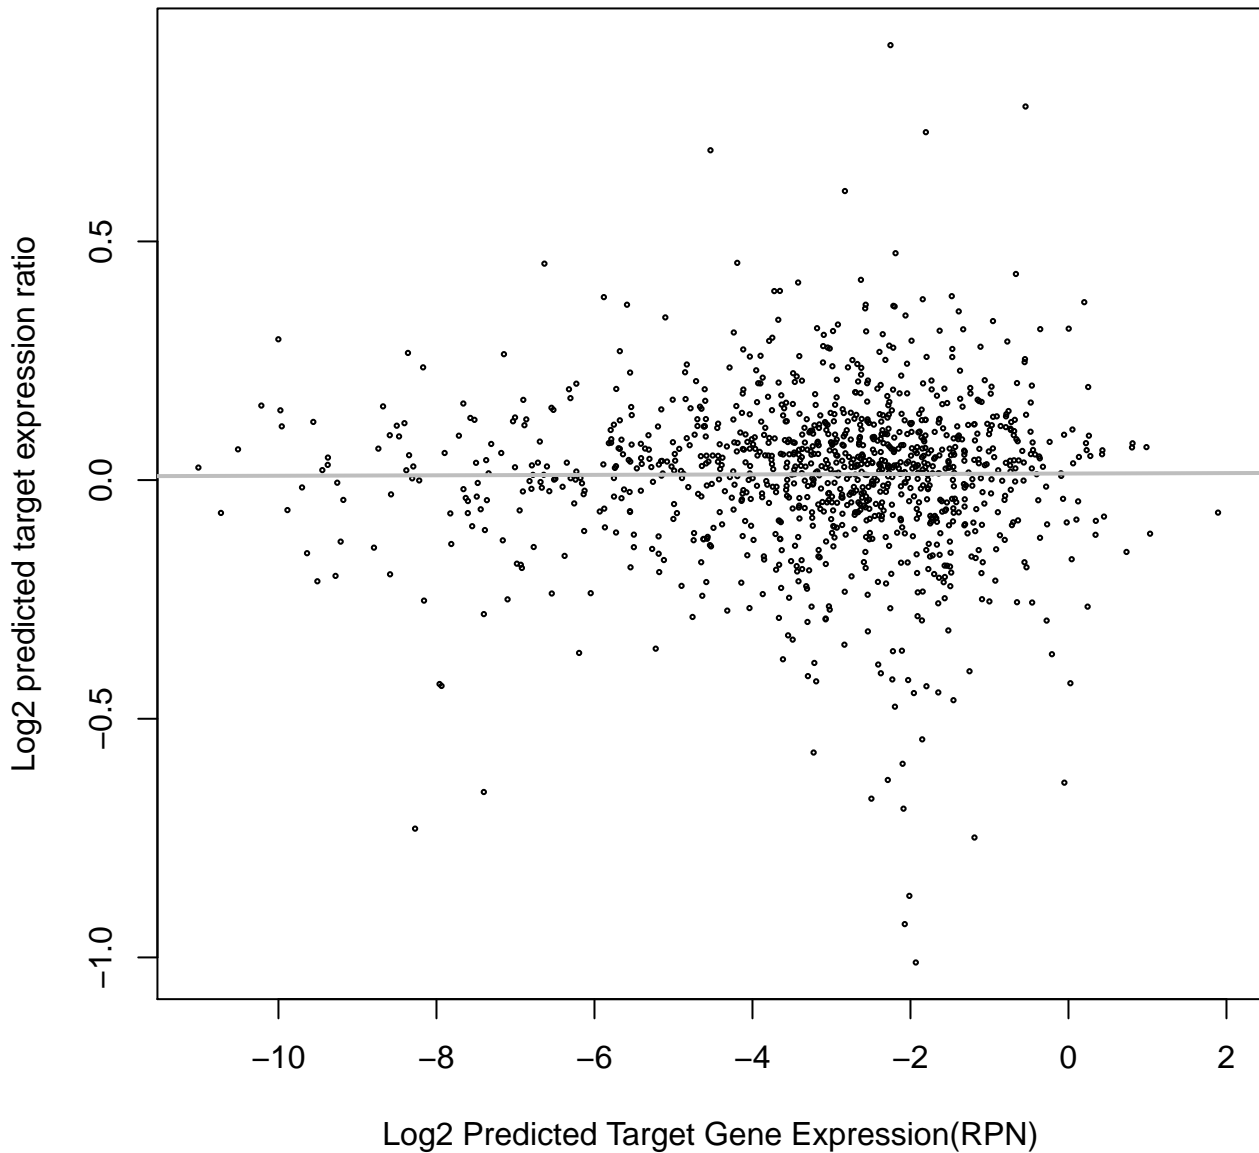

# linsley.hct-170 - miR20

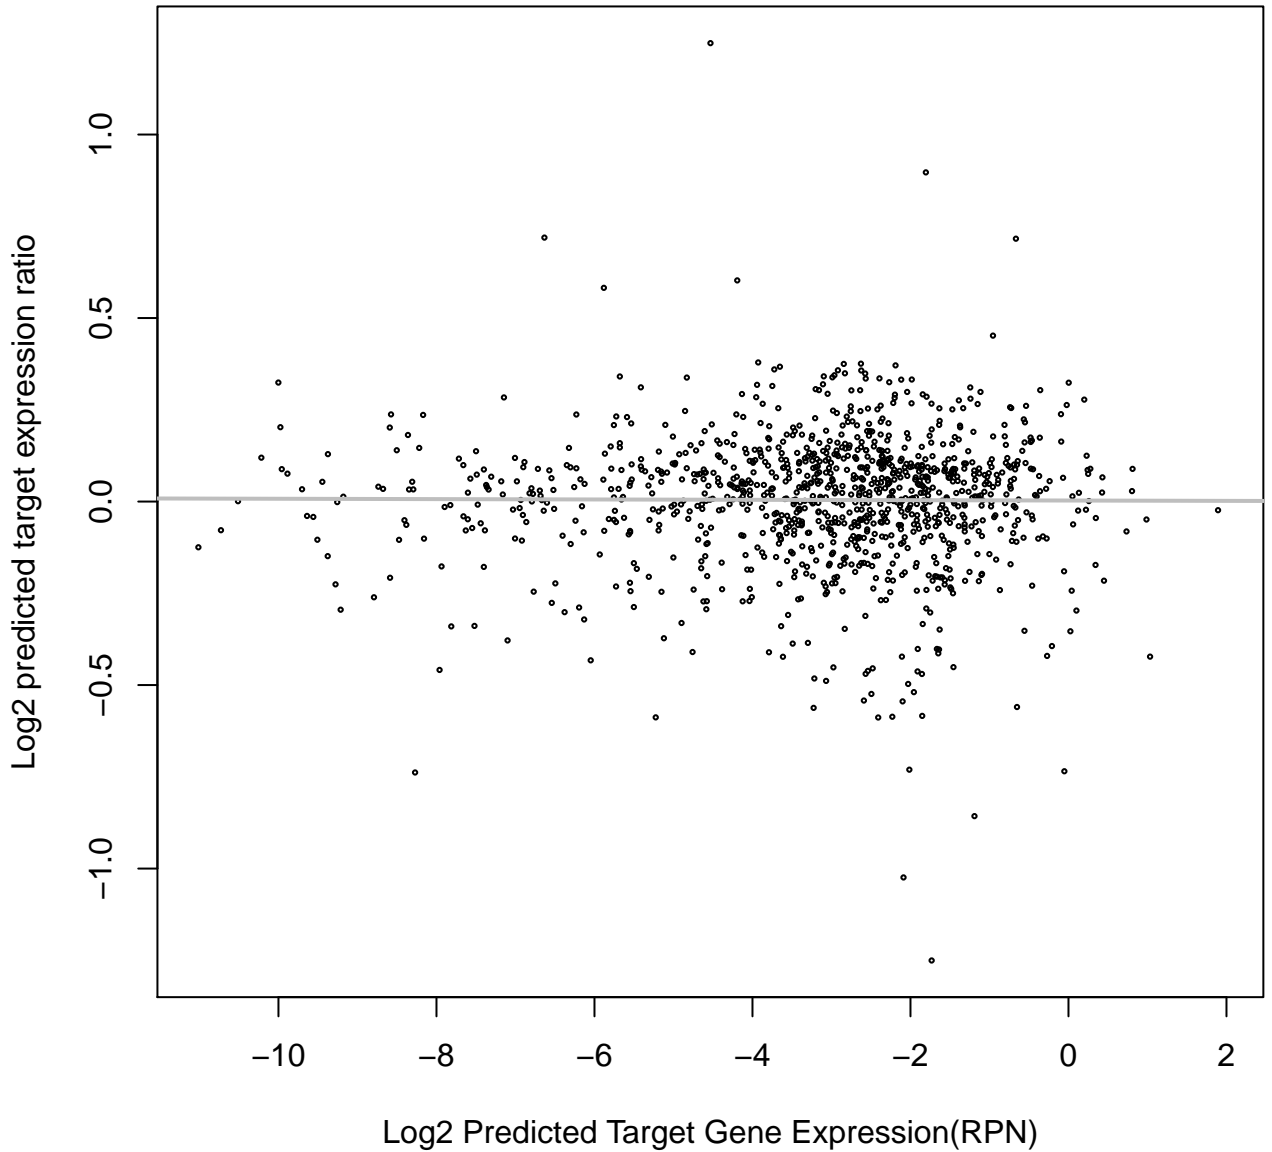

# linsley.hct-171 - let7c

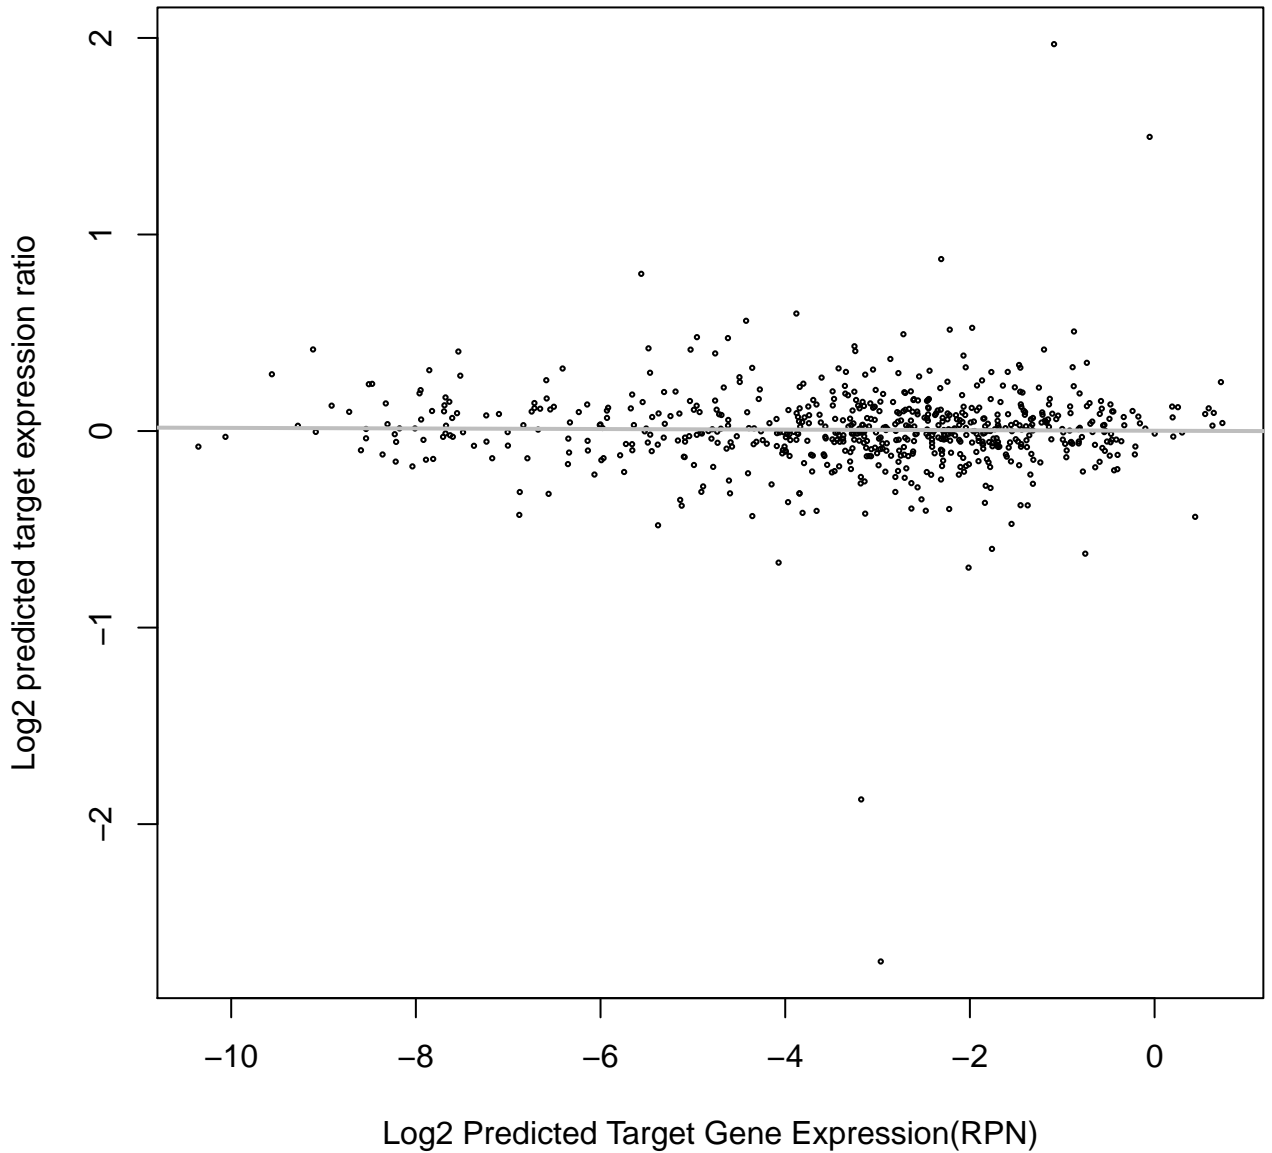

# linsley.hct-172 - miR195

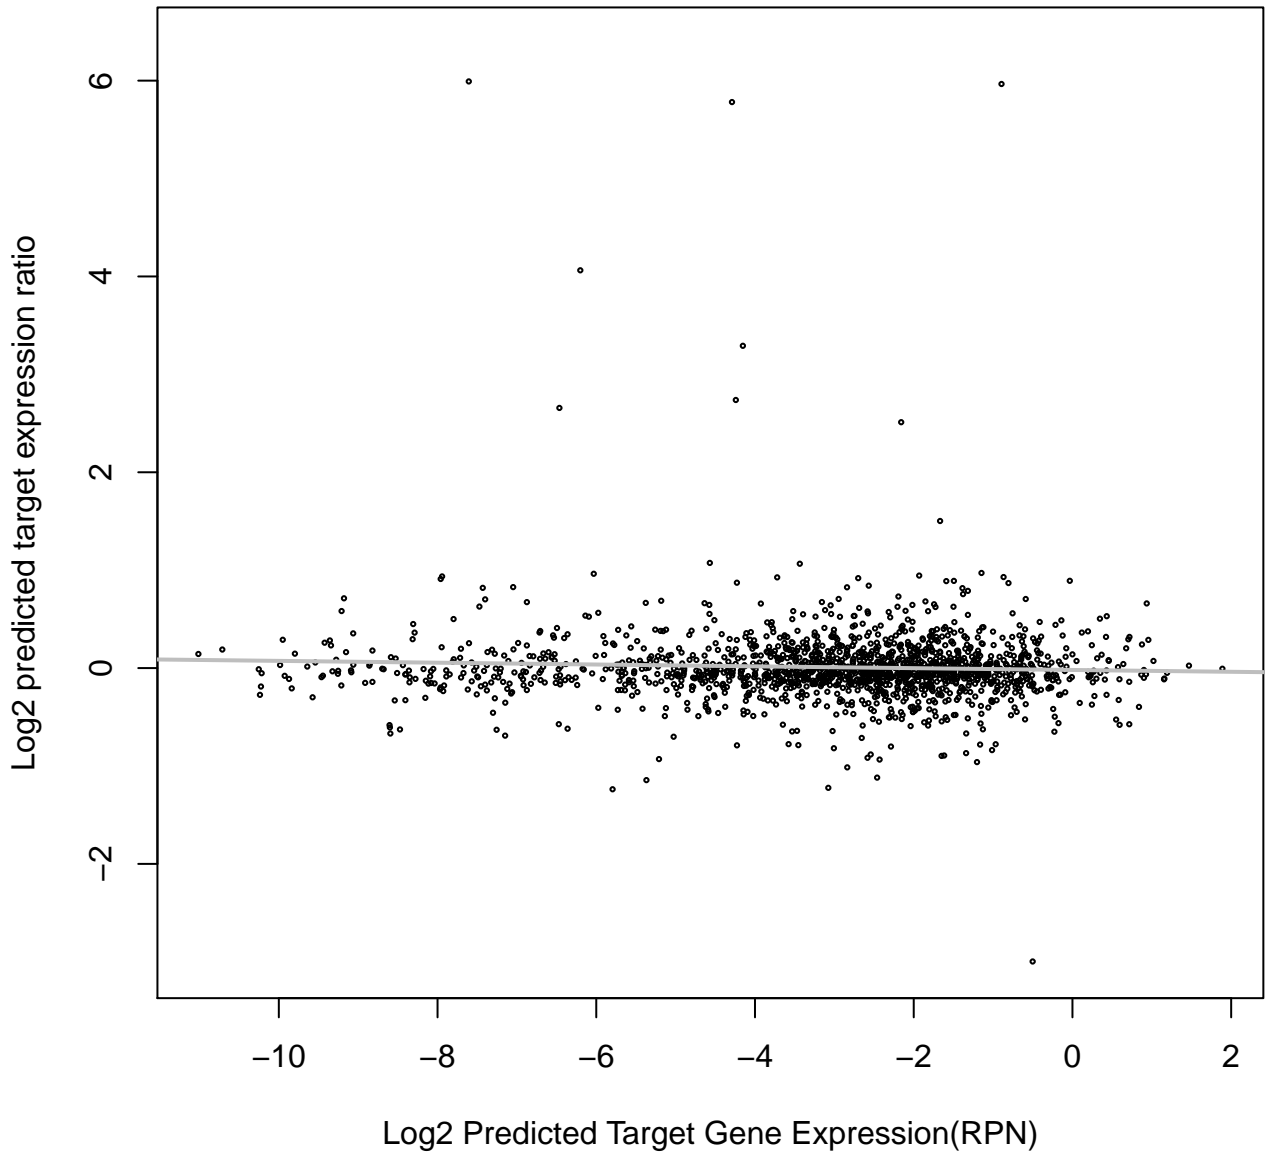

# linsley.hct-173 – miR106b

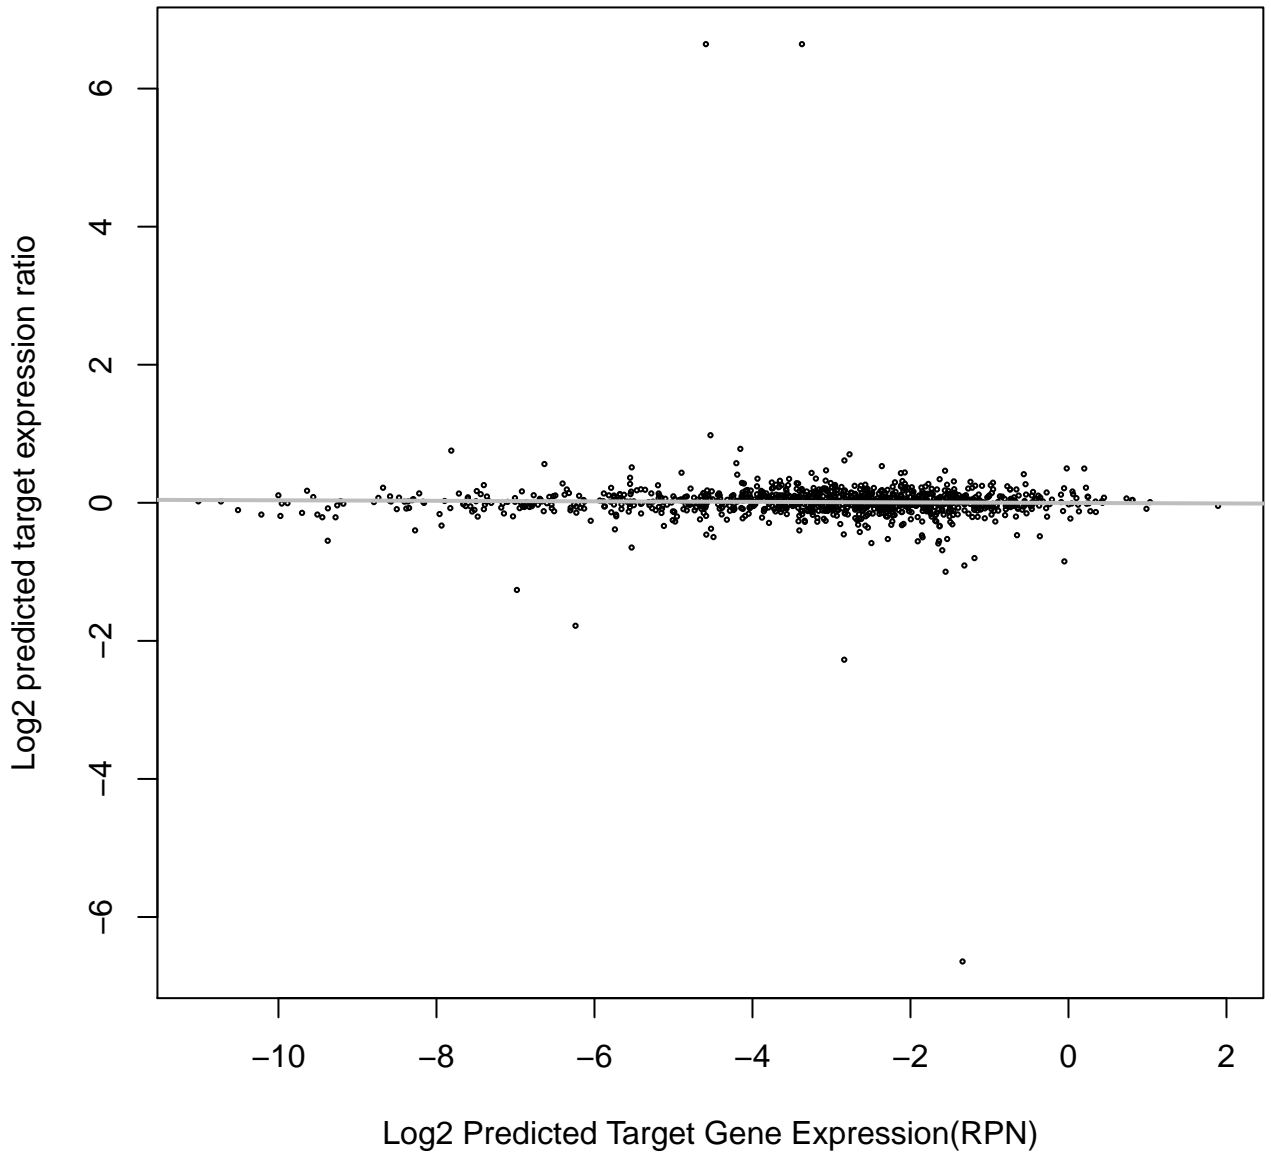

# linsley.hct-174 - miR15a

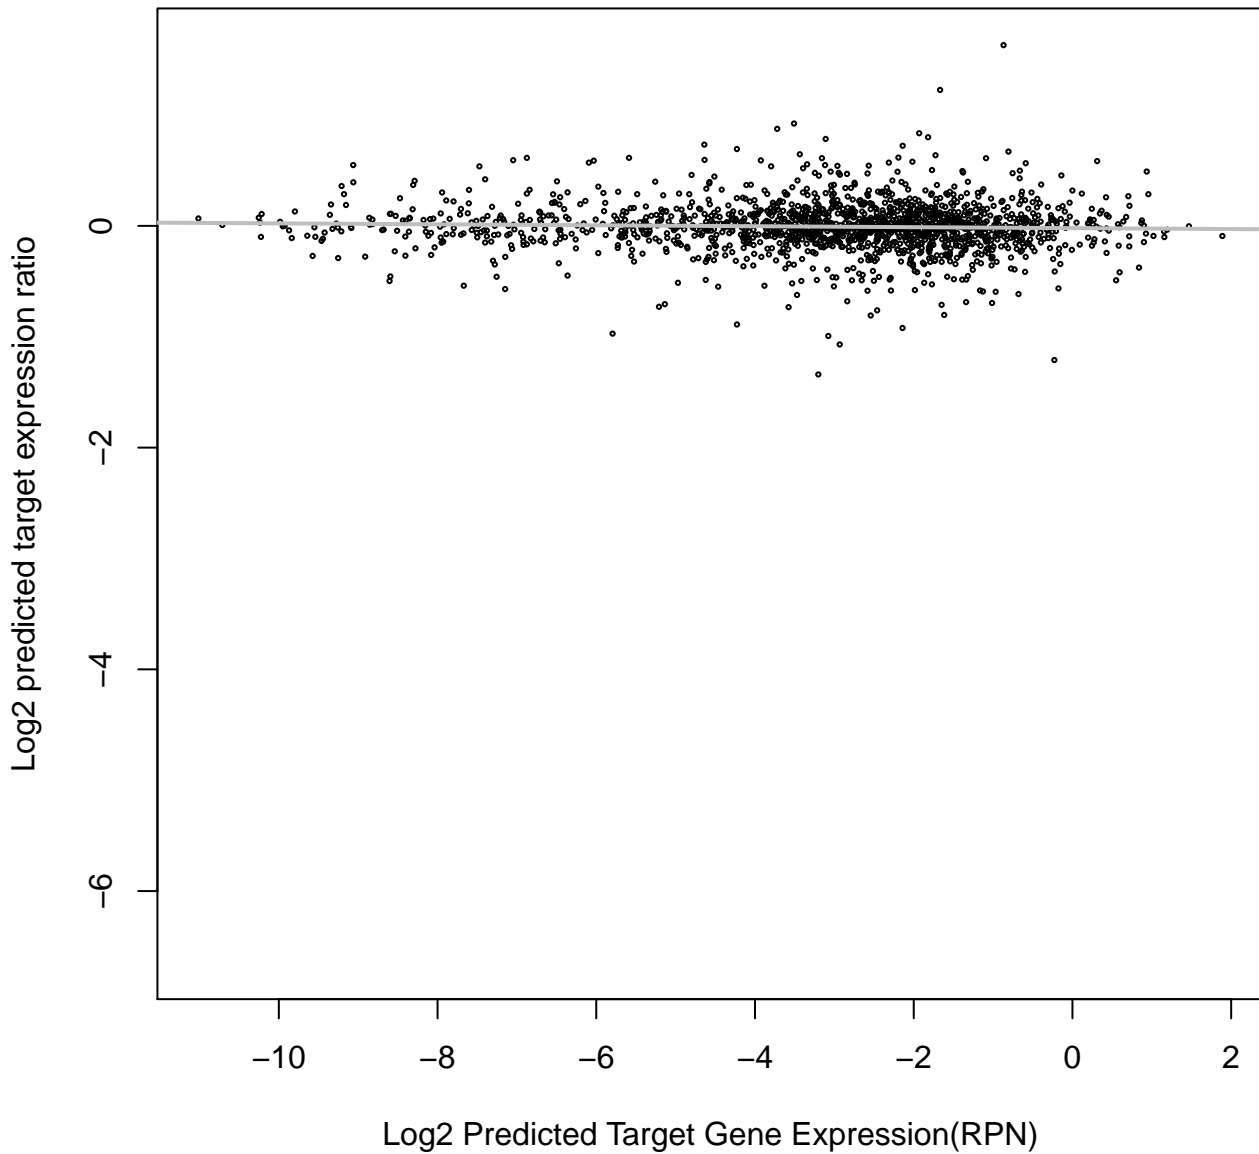



# linsley.hct-175 - miR15b

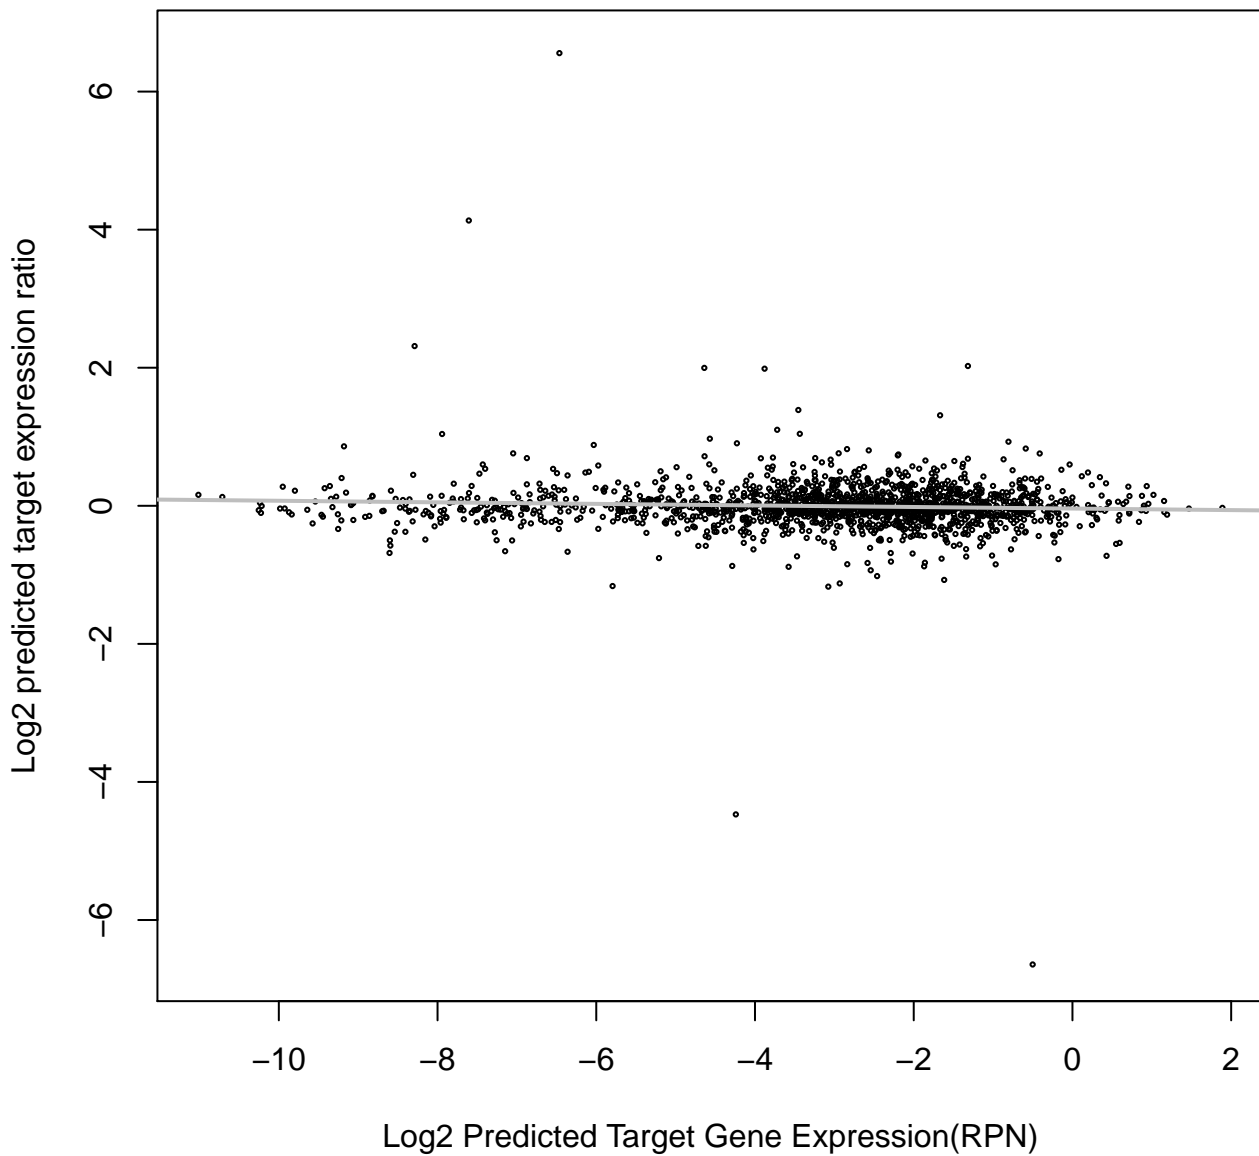

# linsley.hct-176 - miR16

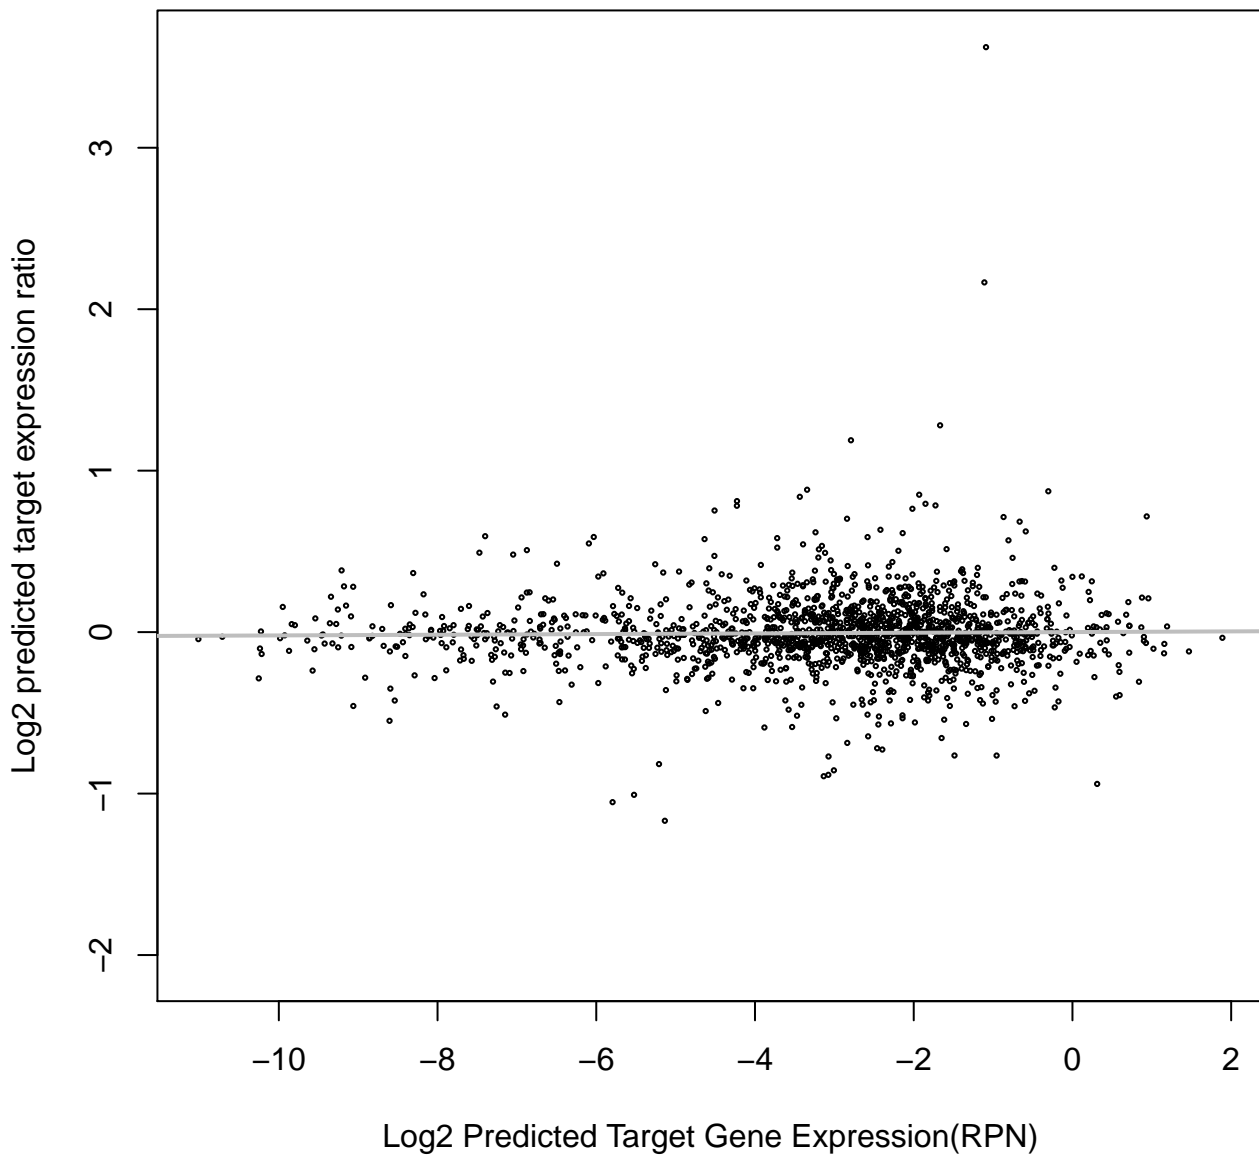

# linsley.hct-177 - miR103

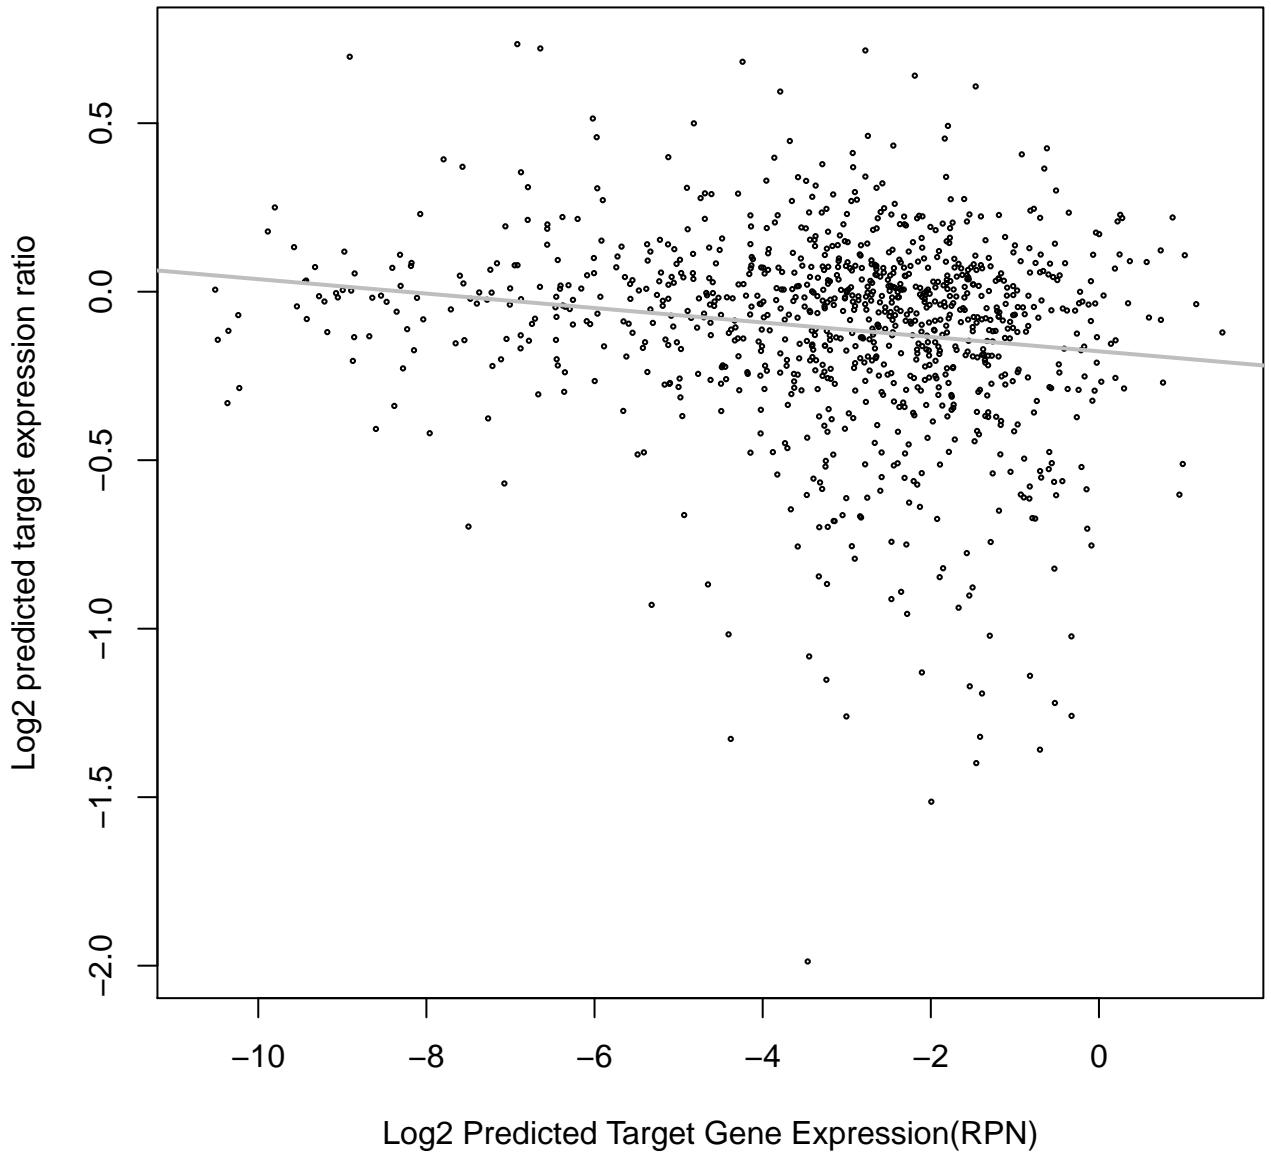

# linsley.hct-178 - miR107

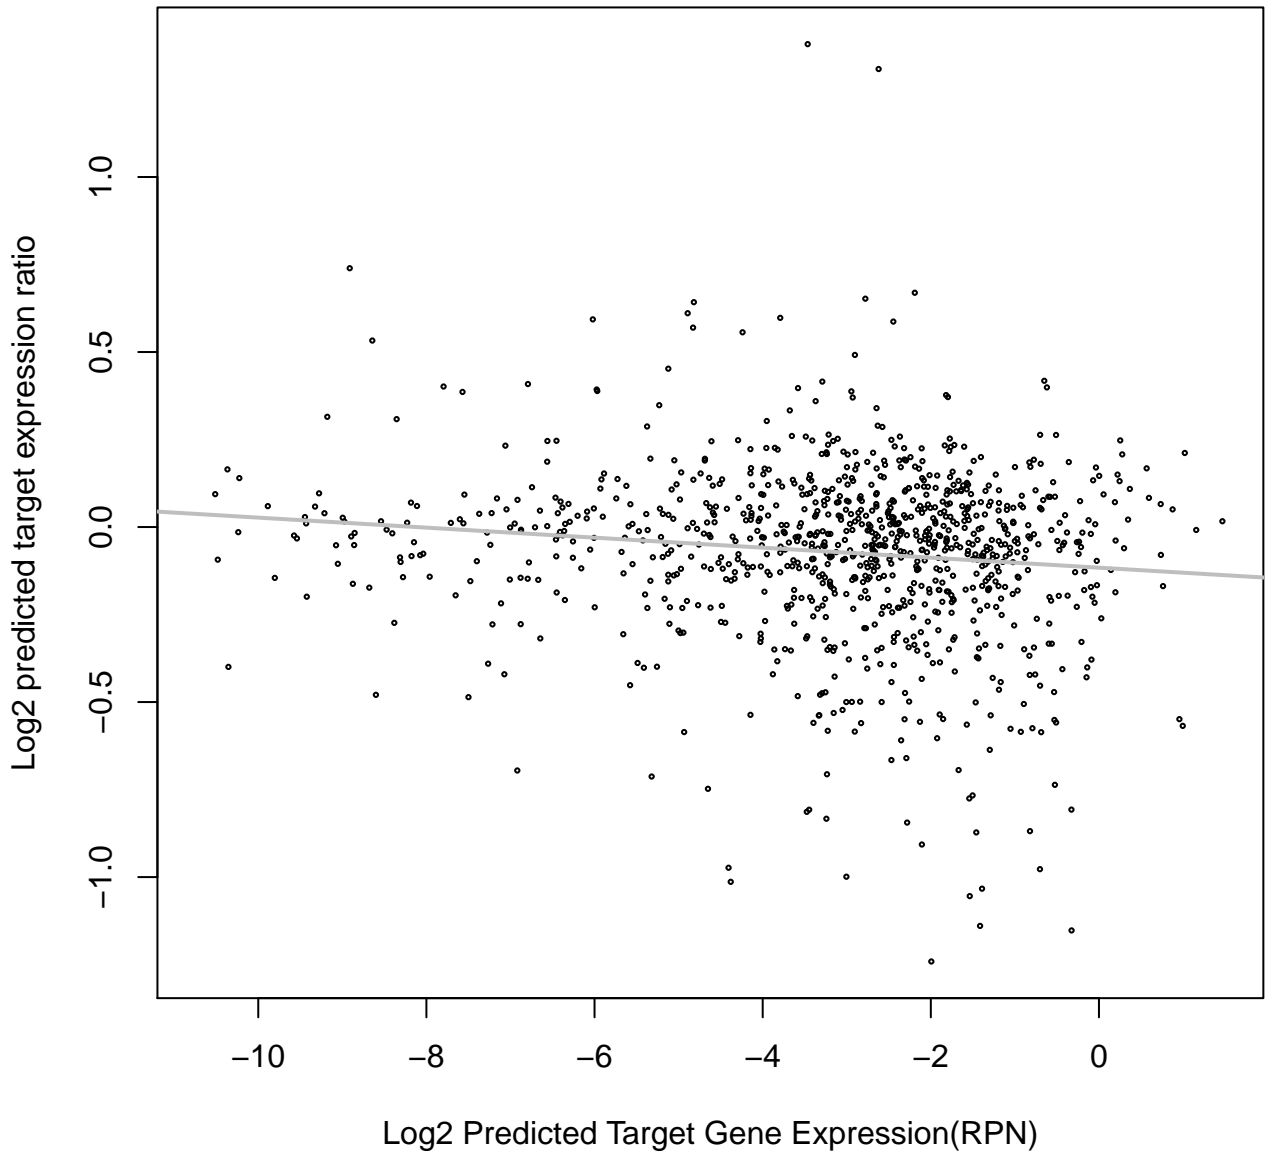

# linsley.hct-179 - miR200a

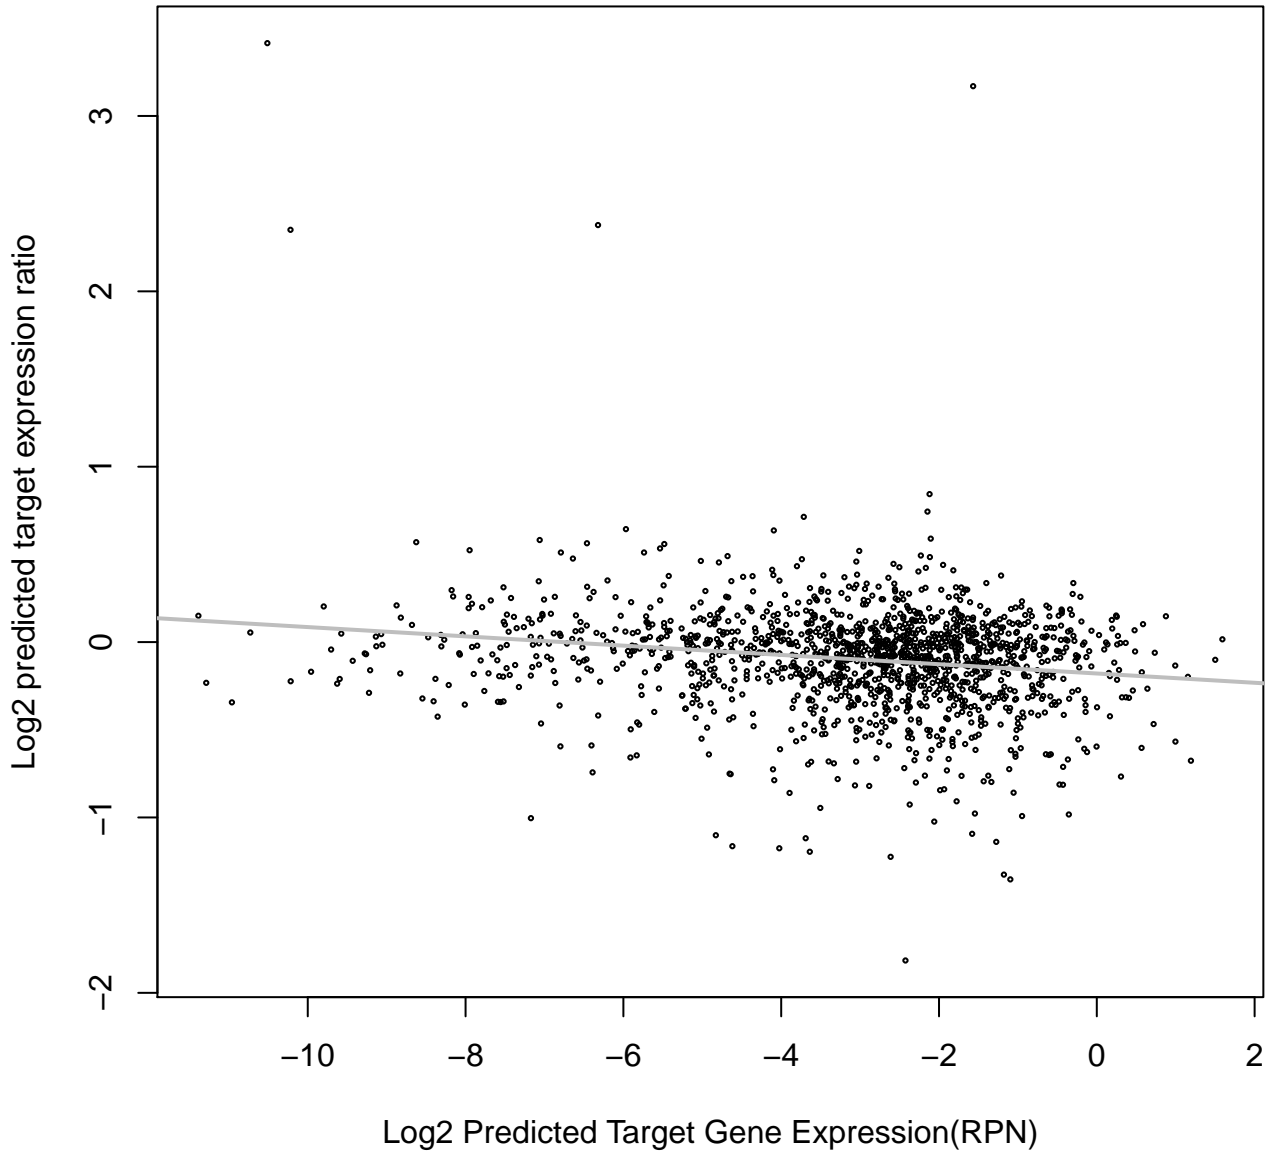

# linsley.hct-180 - miR200b

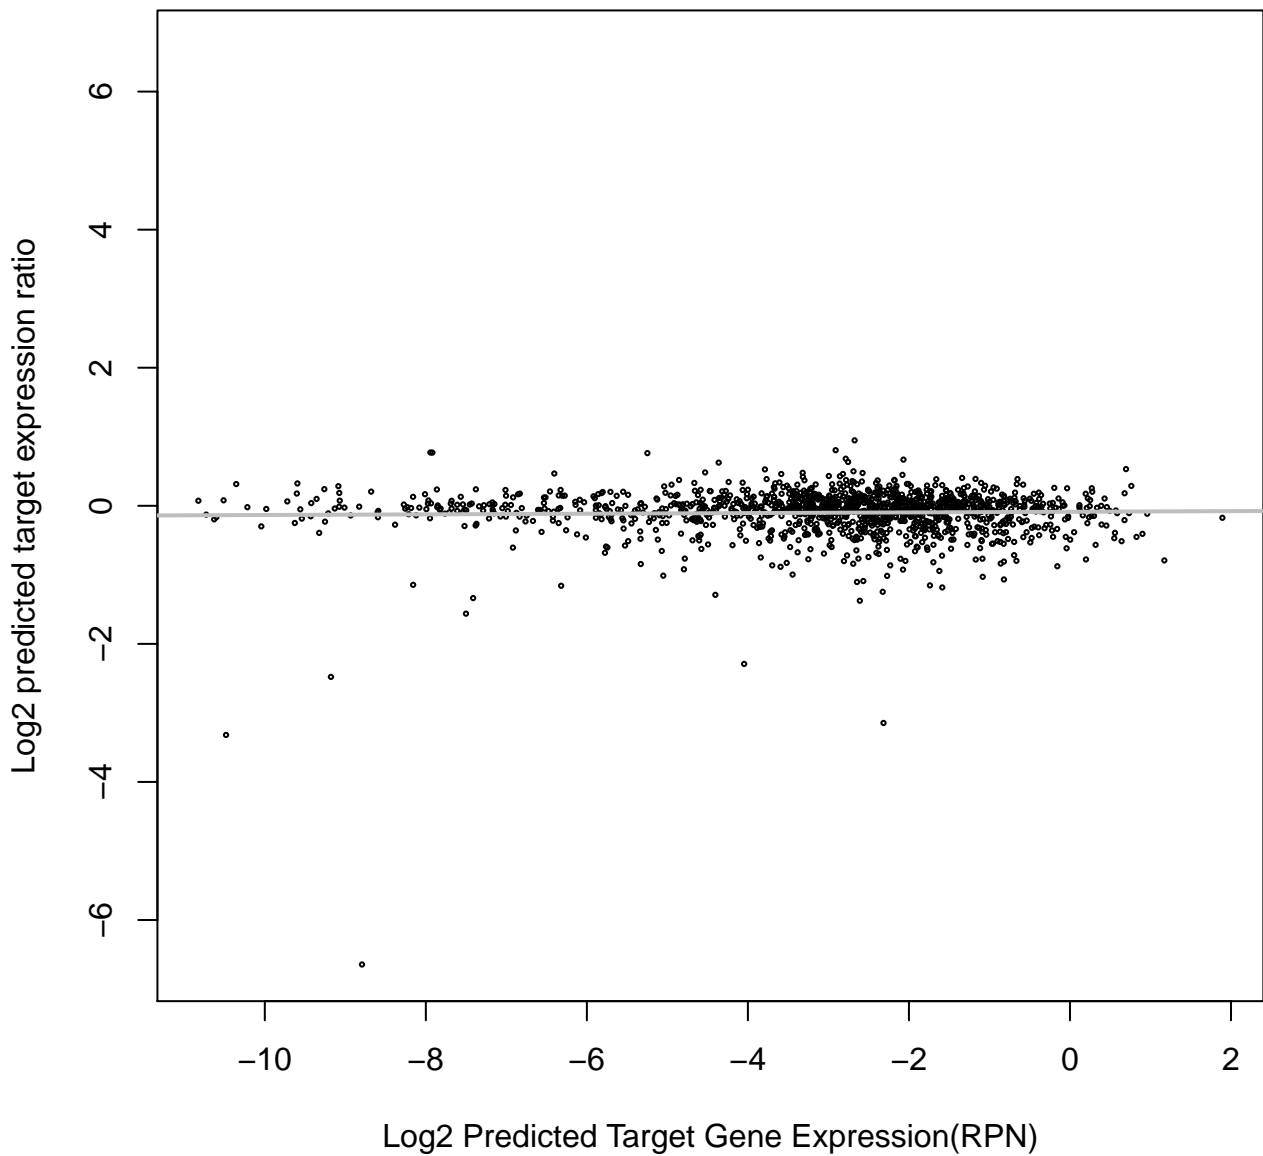

# linsley.hct-181 - miR141

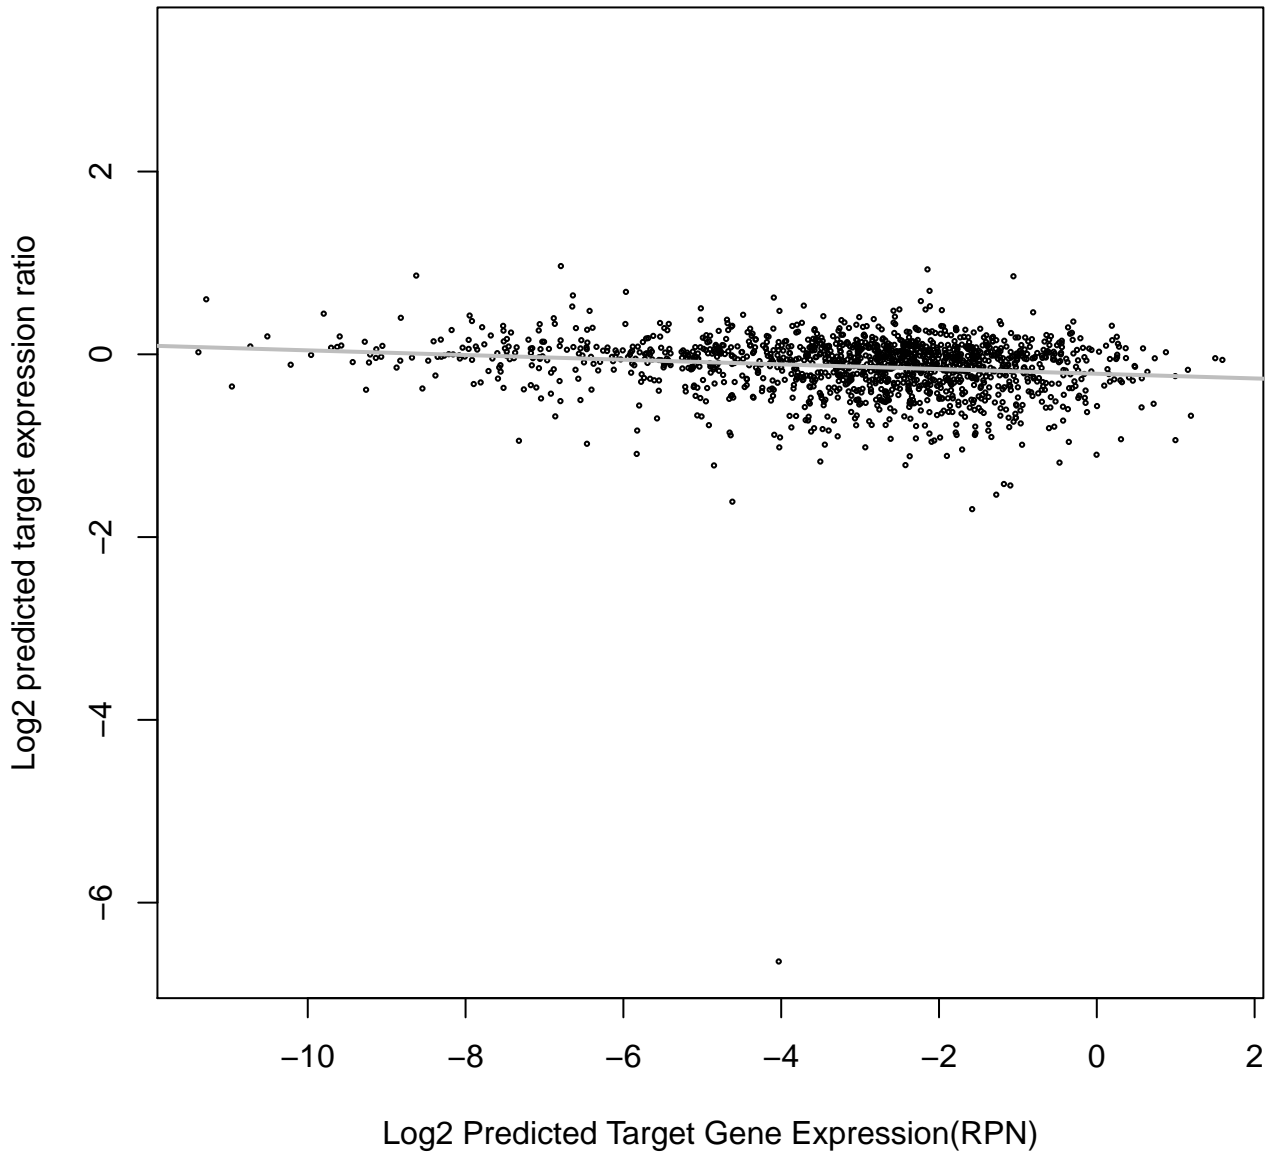

# linsley-68 - miR16

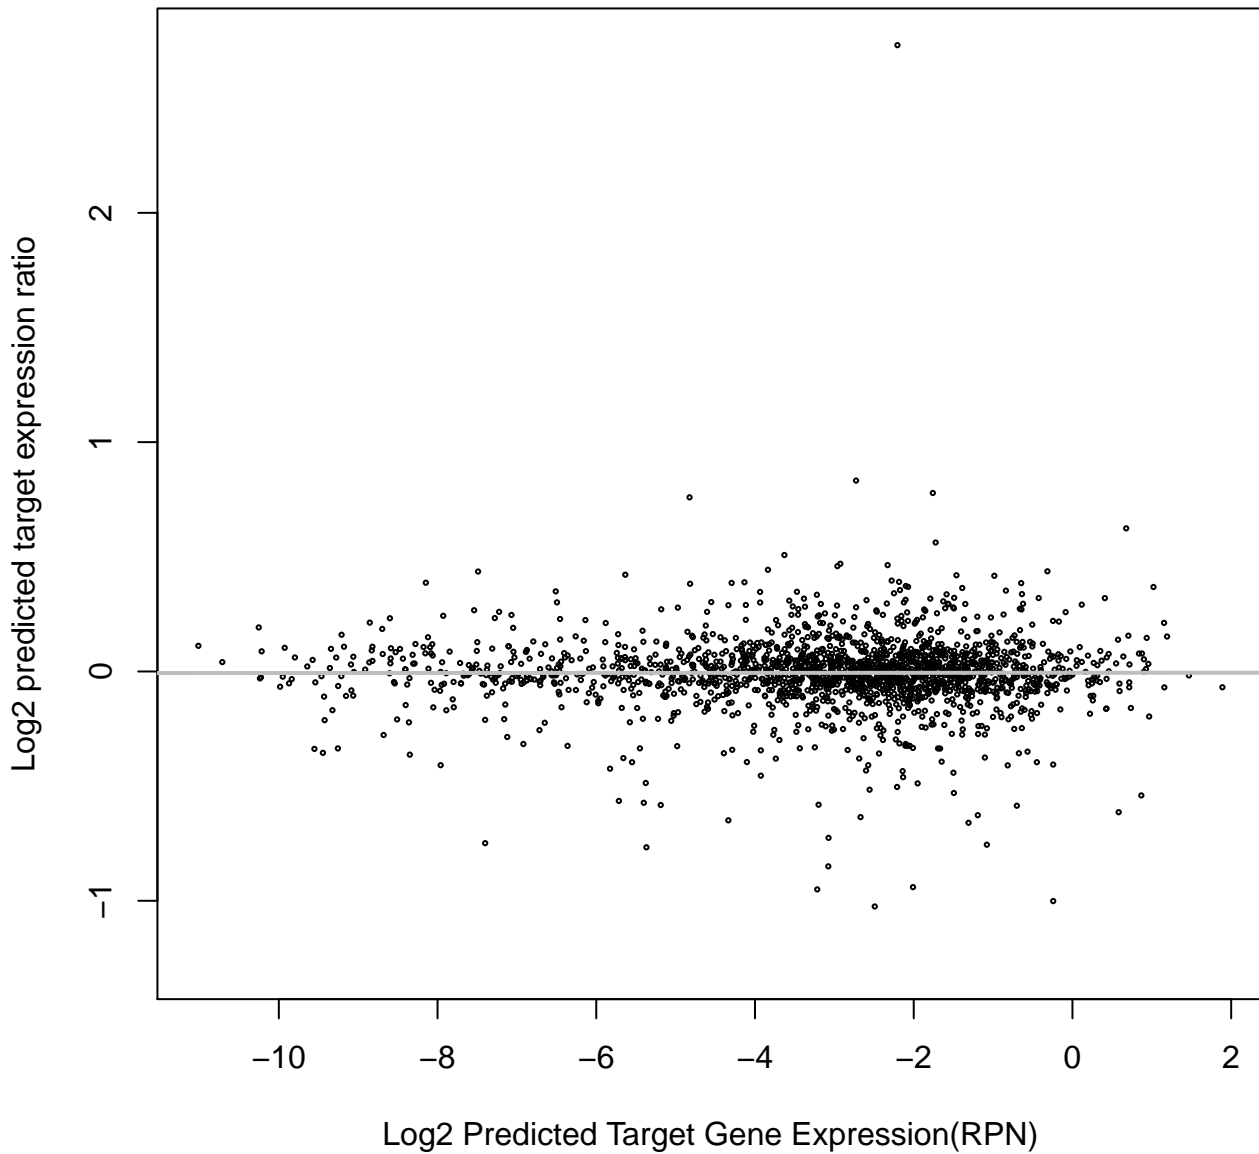



# linsley-69 - miR106b

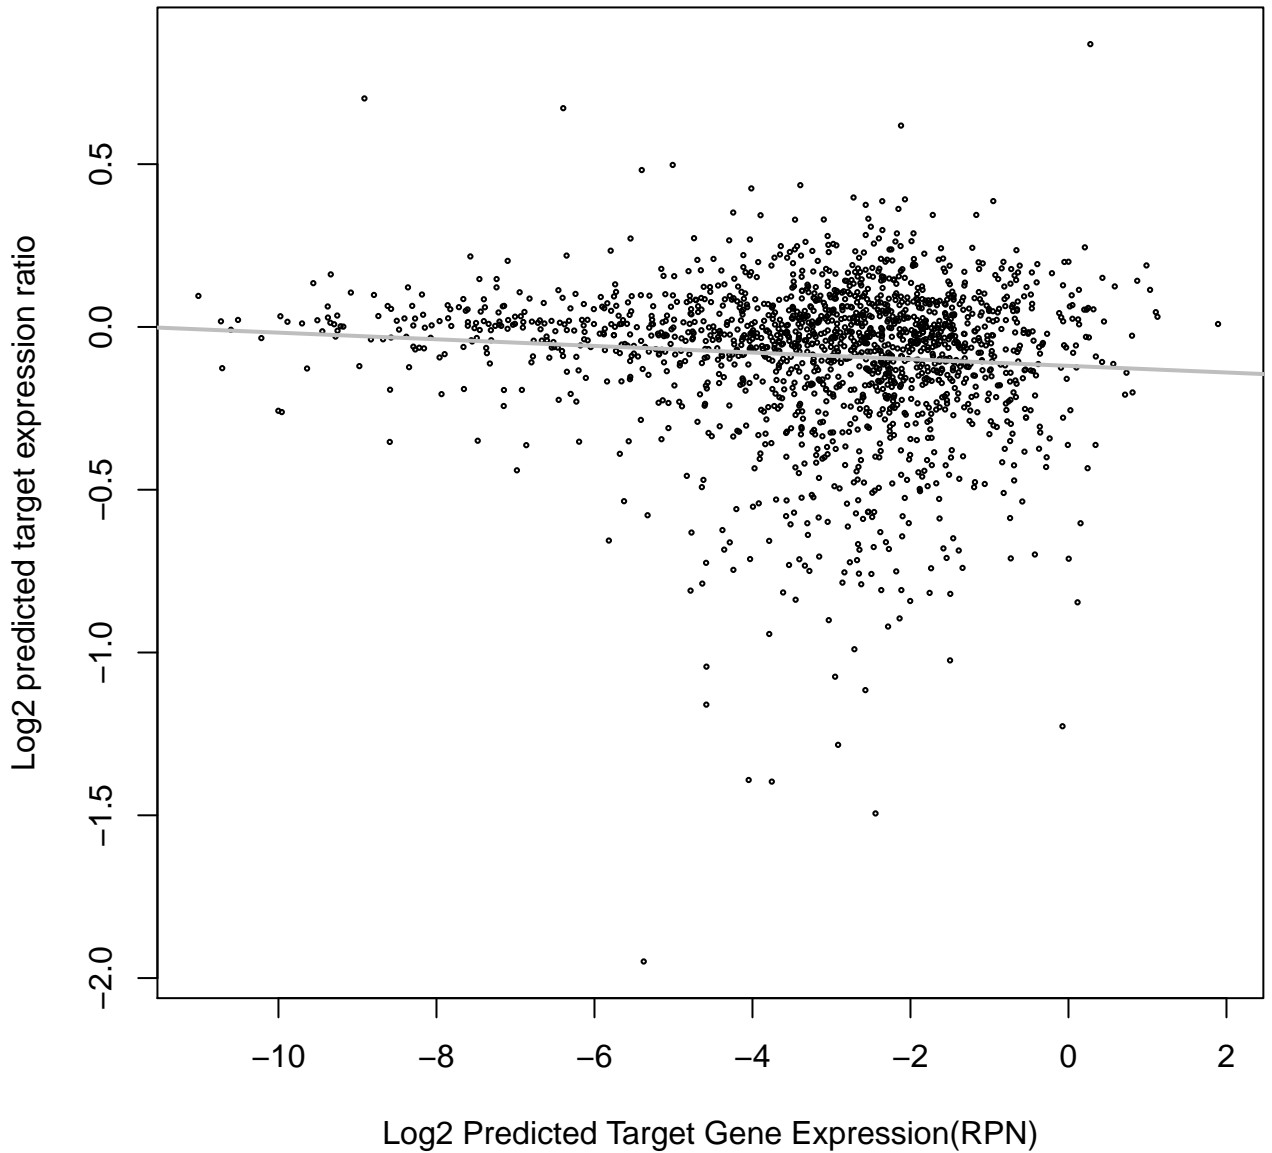

# selbach.8-24 - miR1

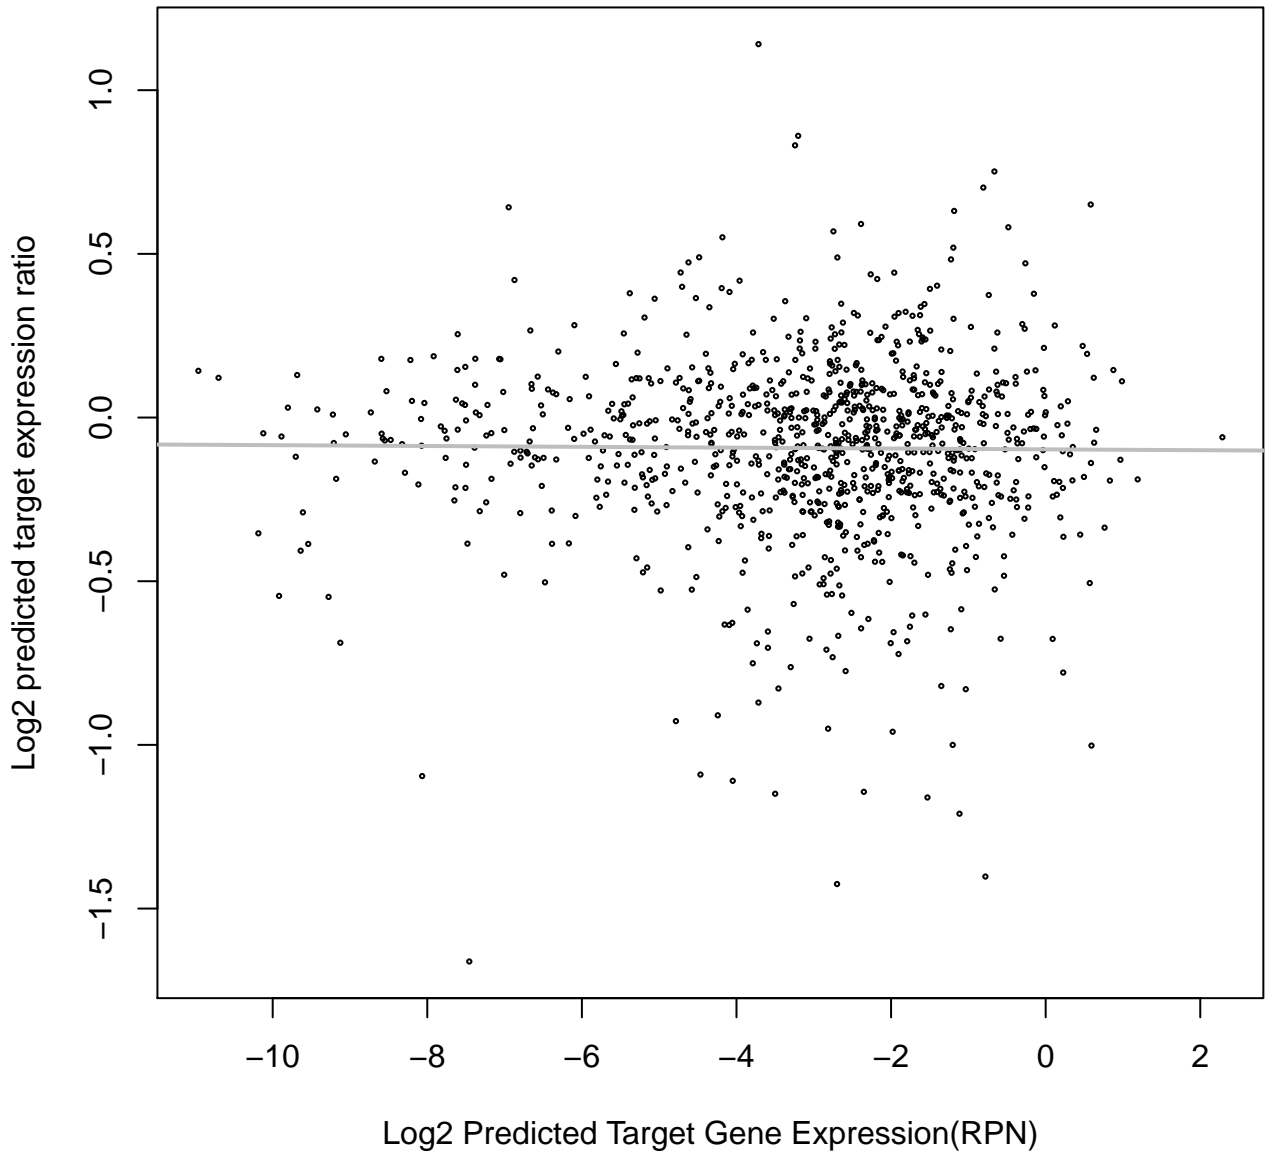

# selbach.8-25 - miR30a

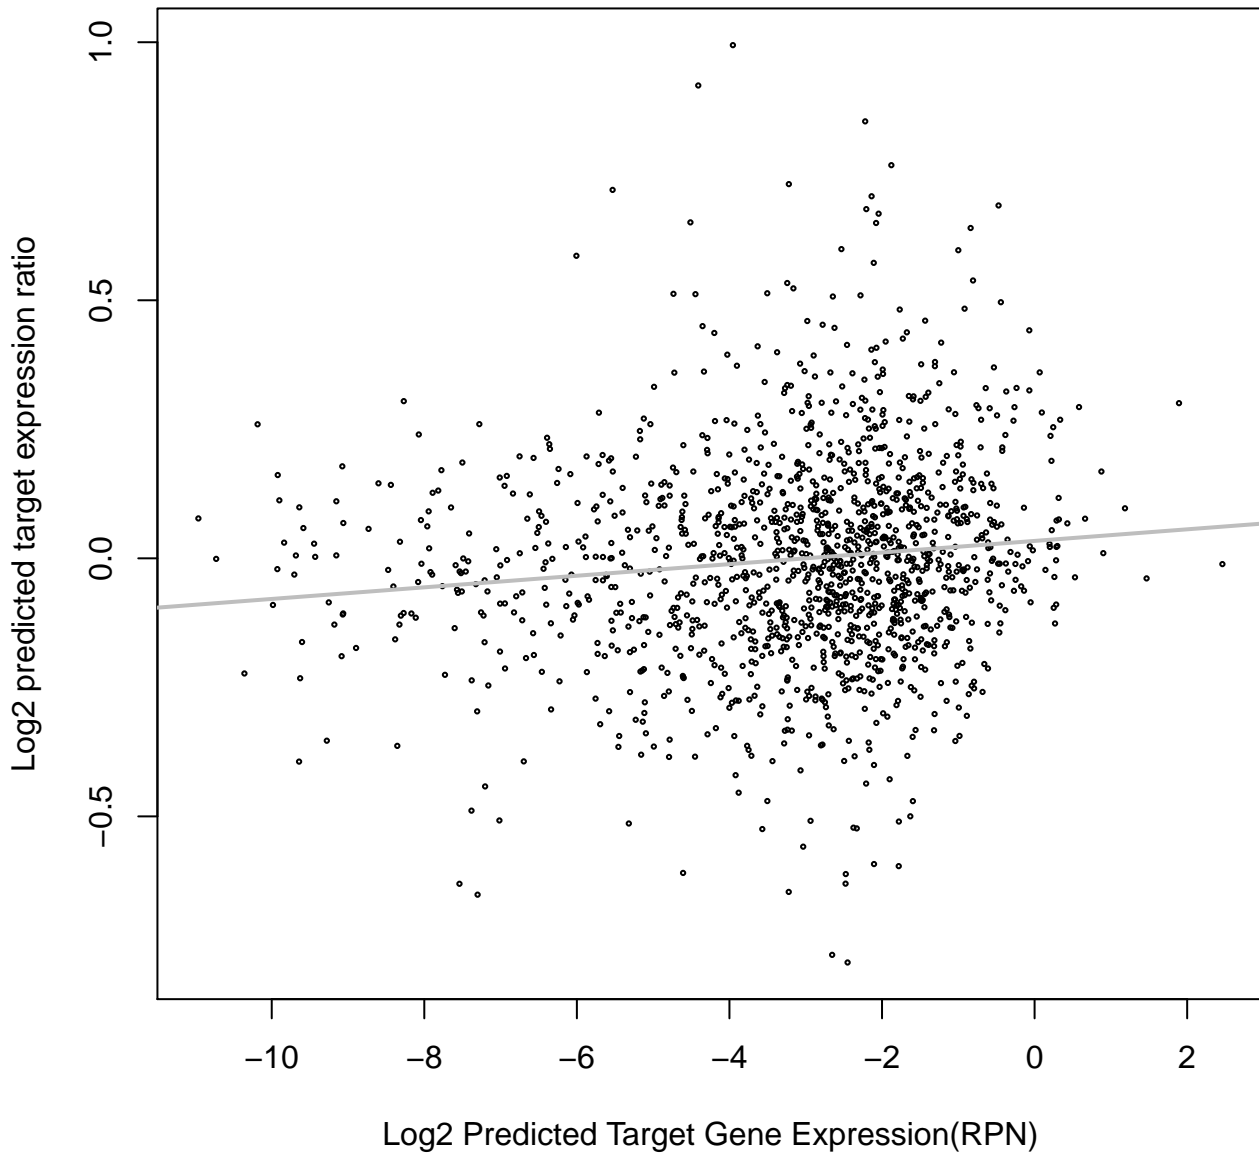

# selbach.8-26 - miR155

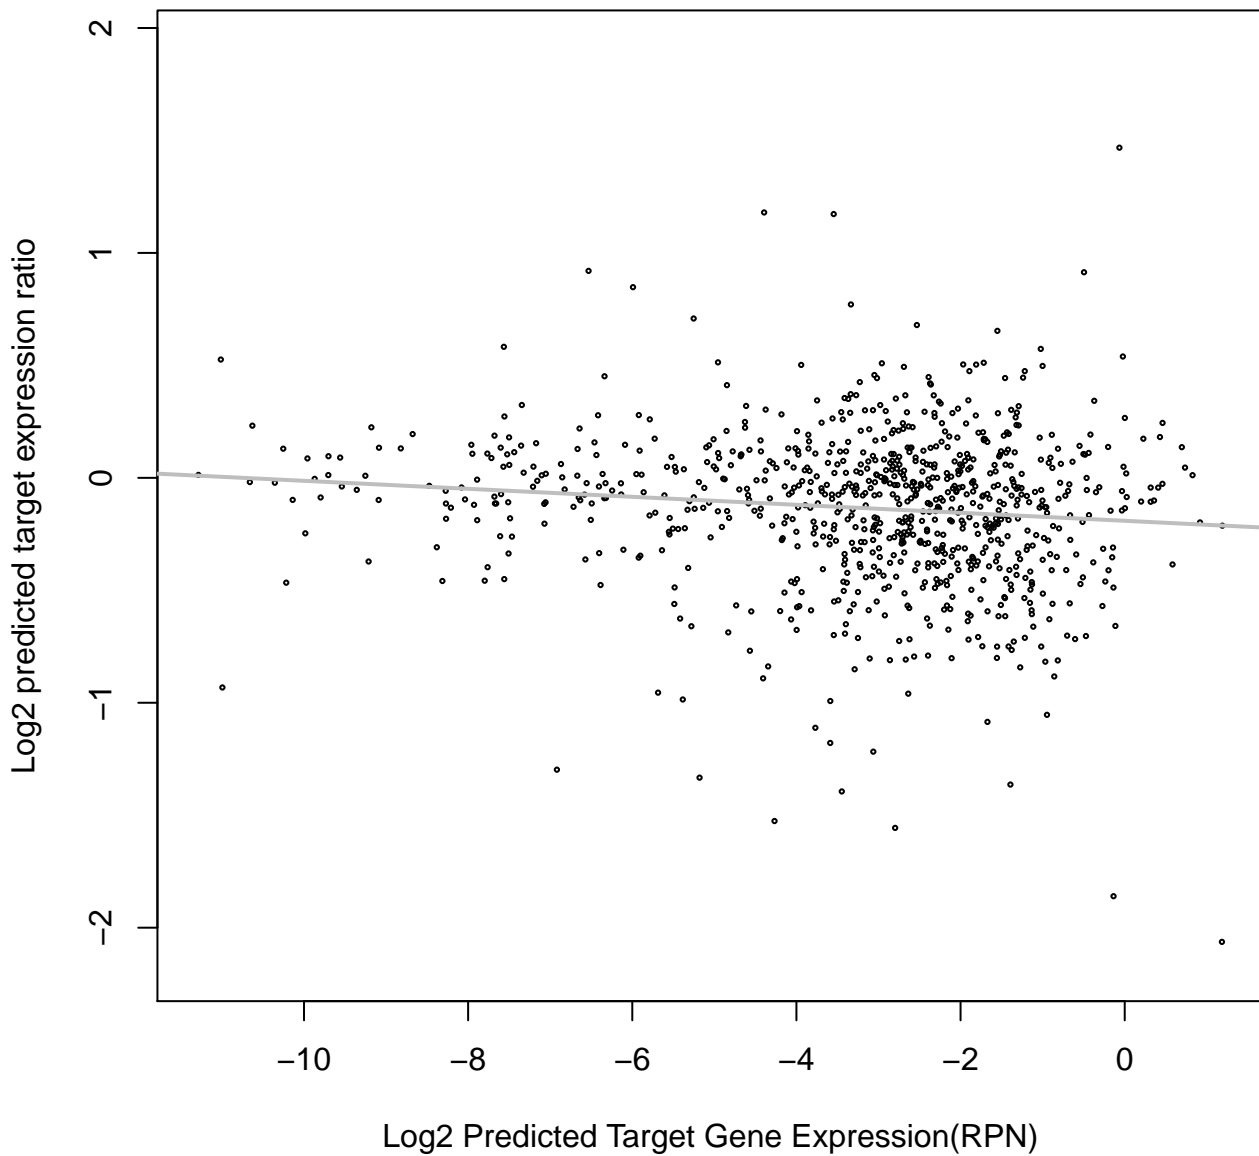

# selbach.8-27 - miR16

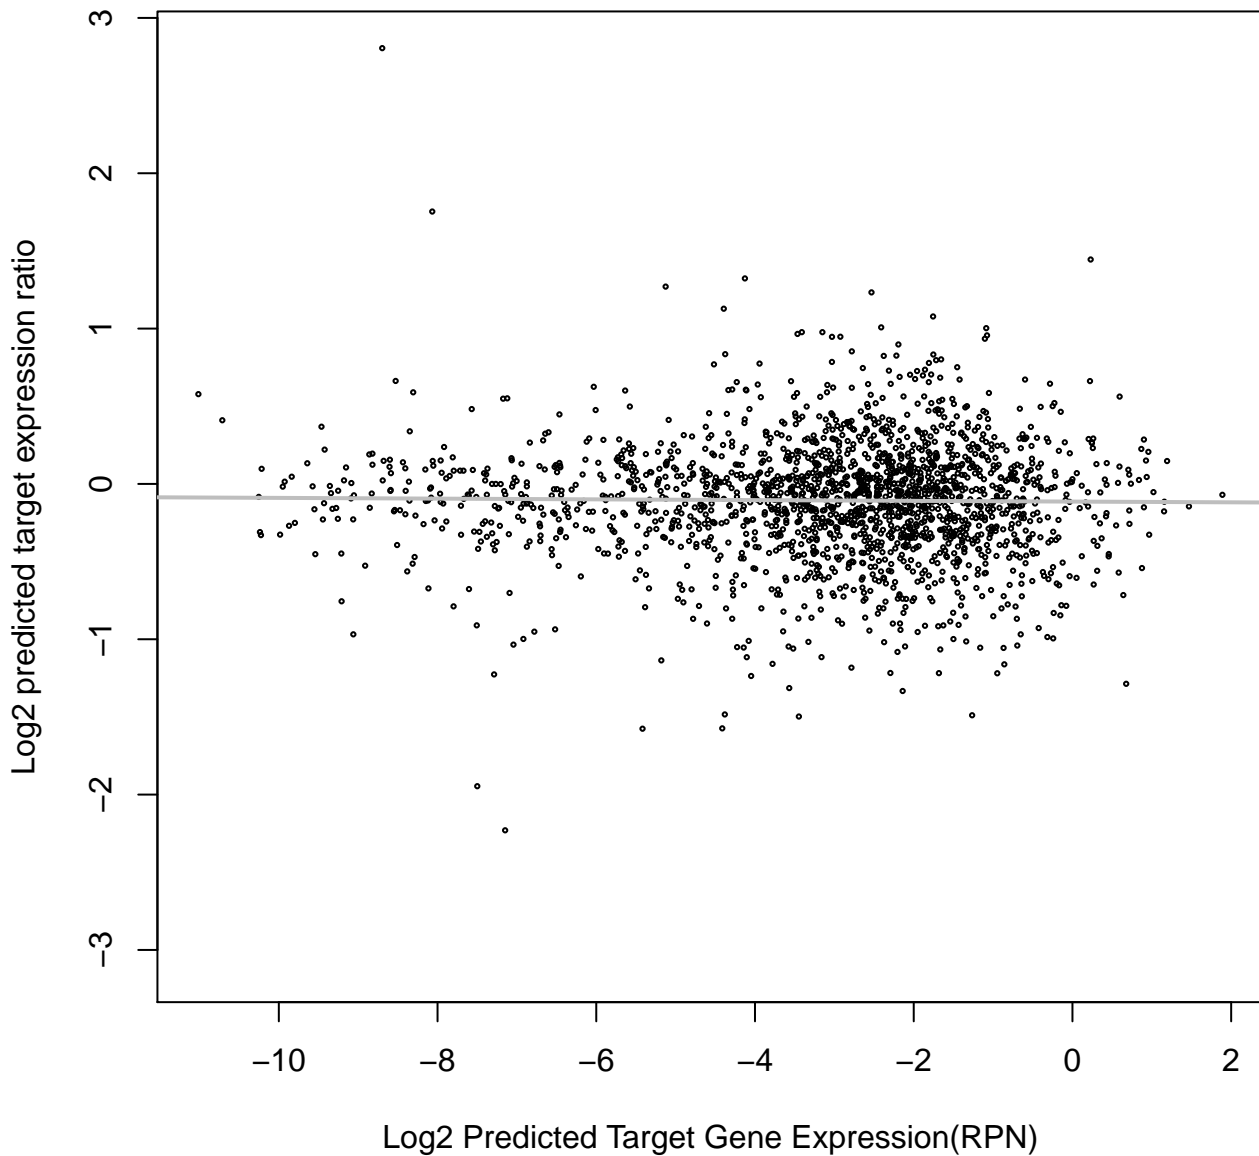

# selbach.8-28 - let7b

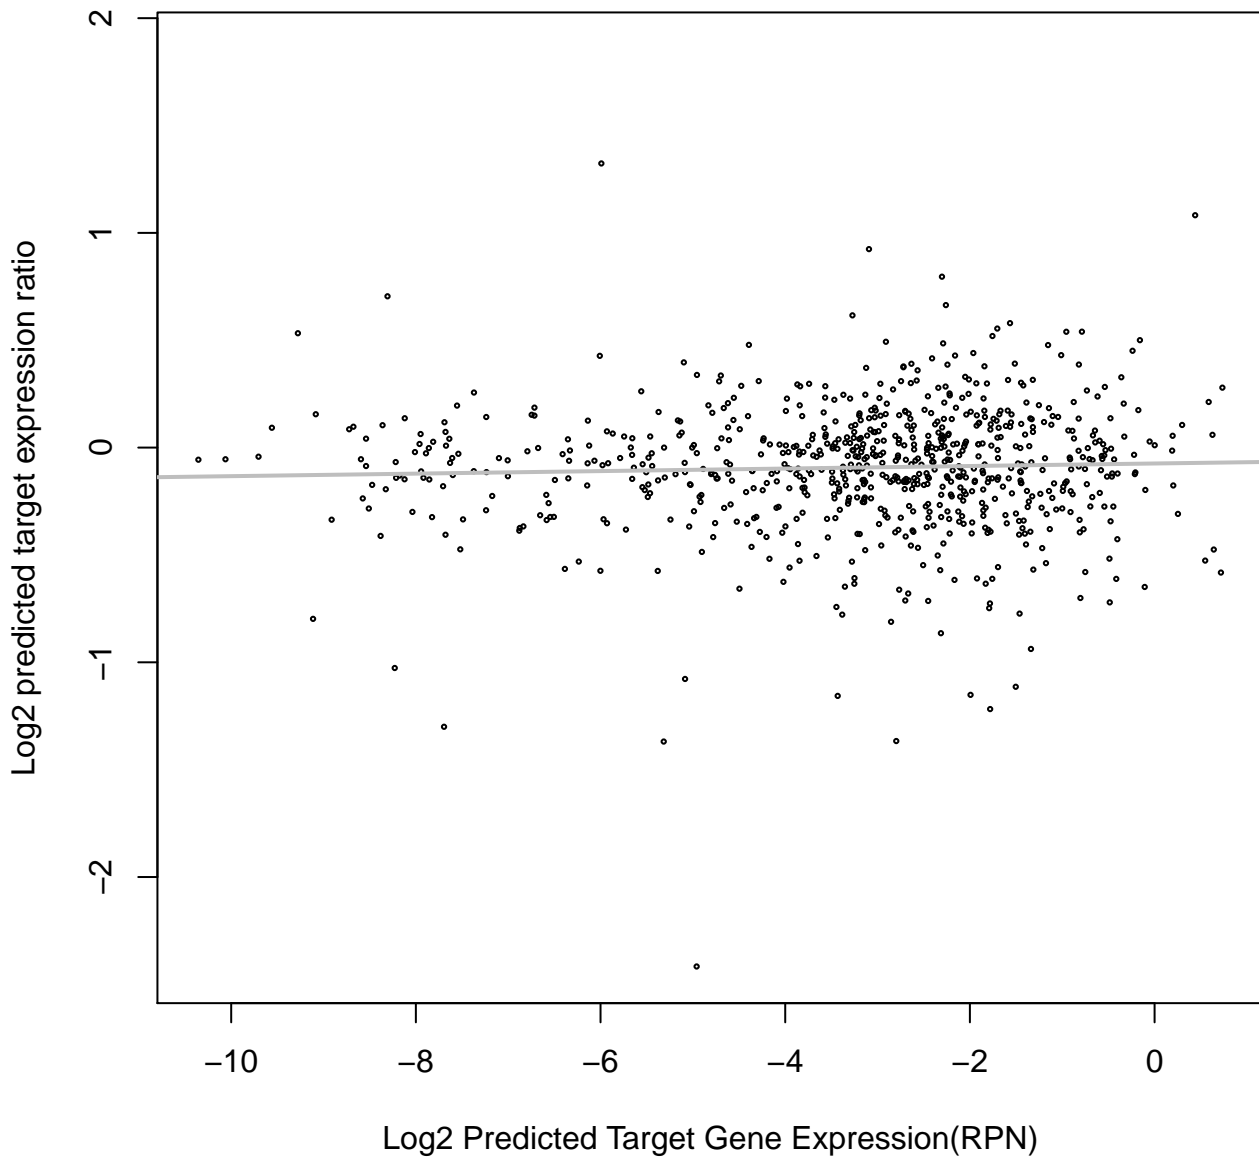

# selbach-19 - miR1

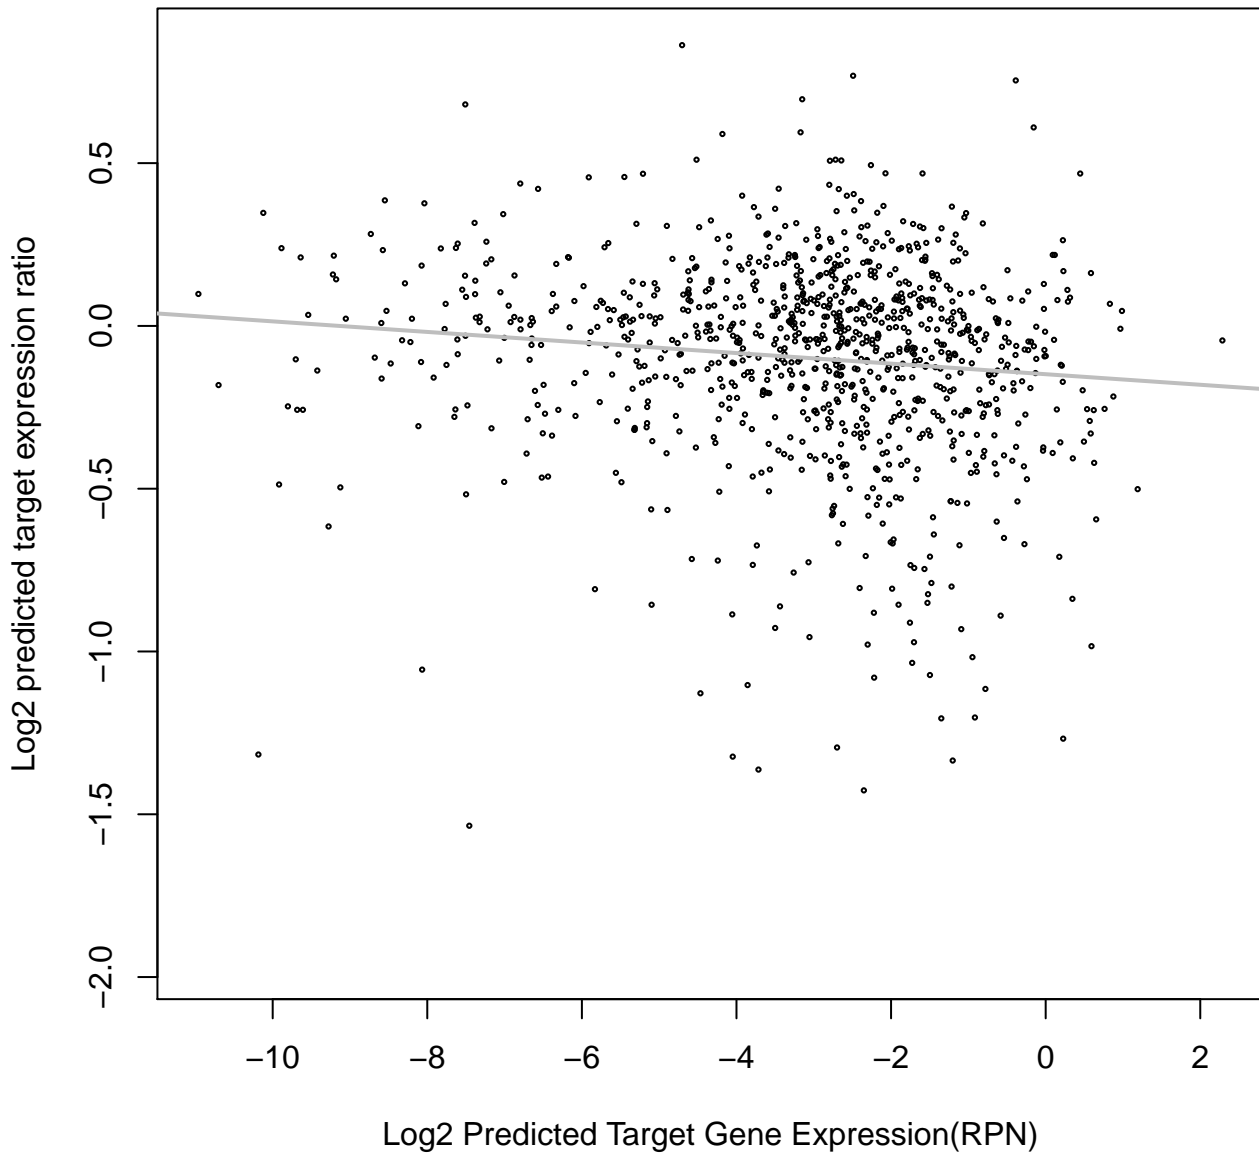

# selbach-20 - miR30a

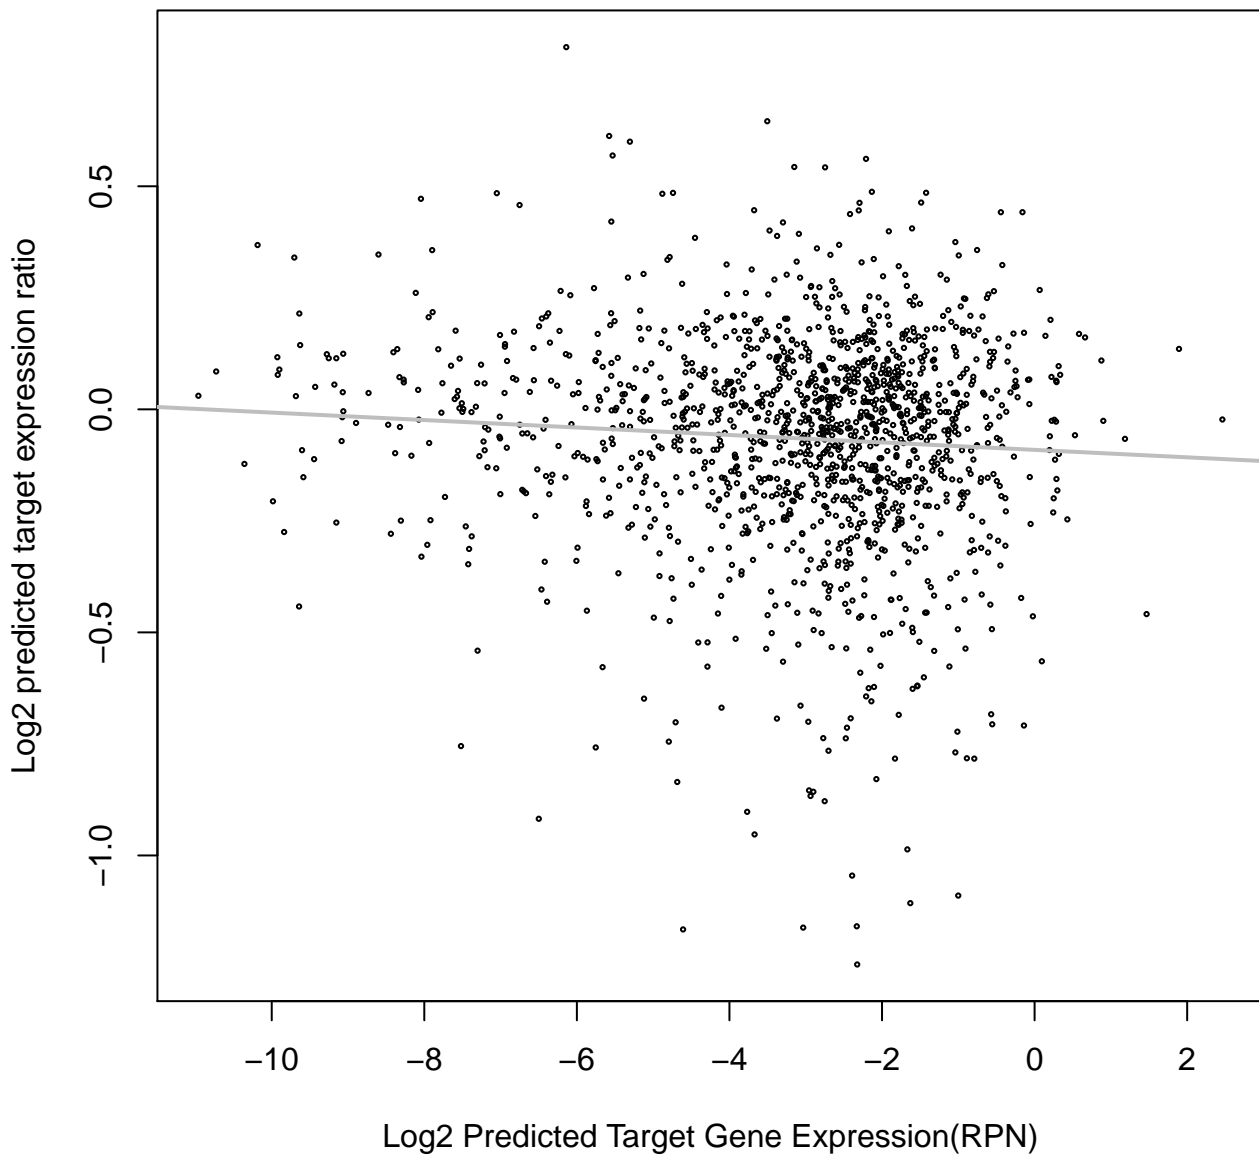



# selbach-21 - miR155

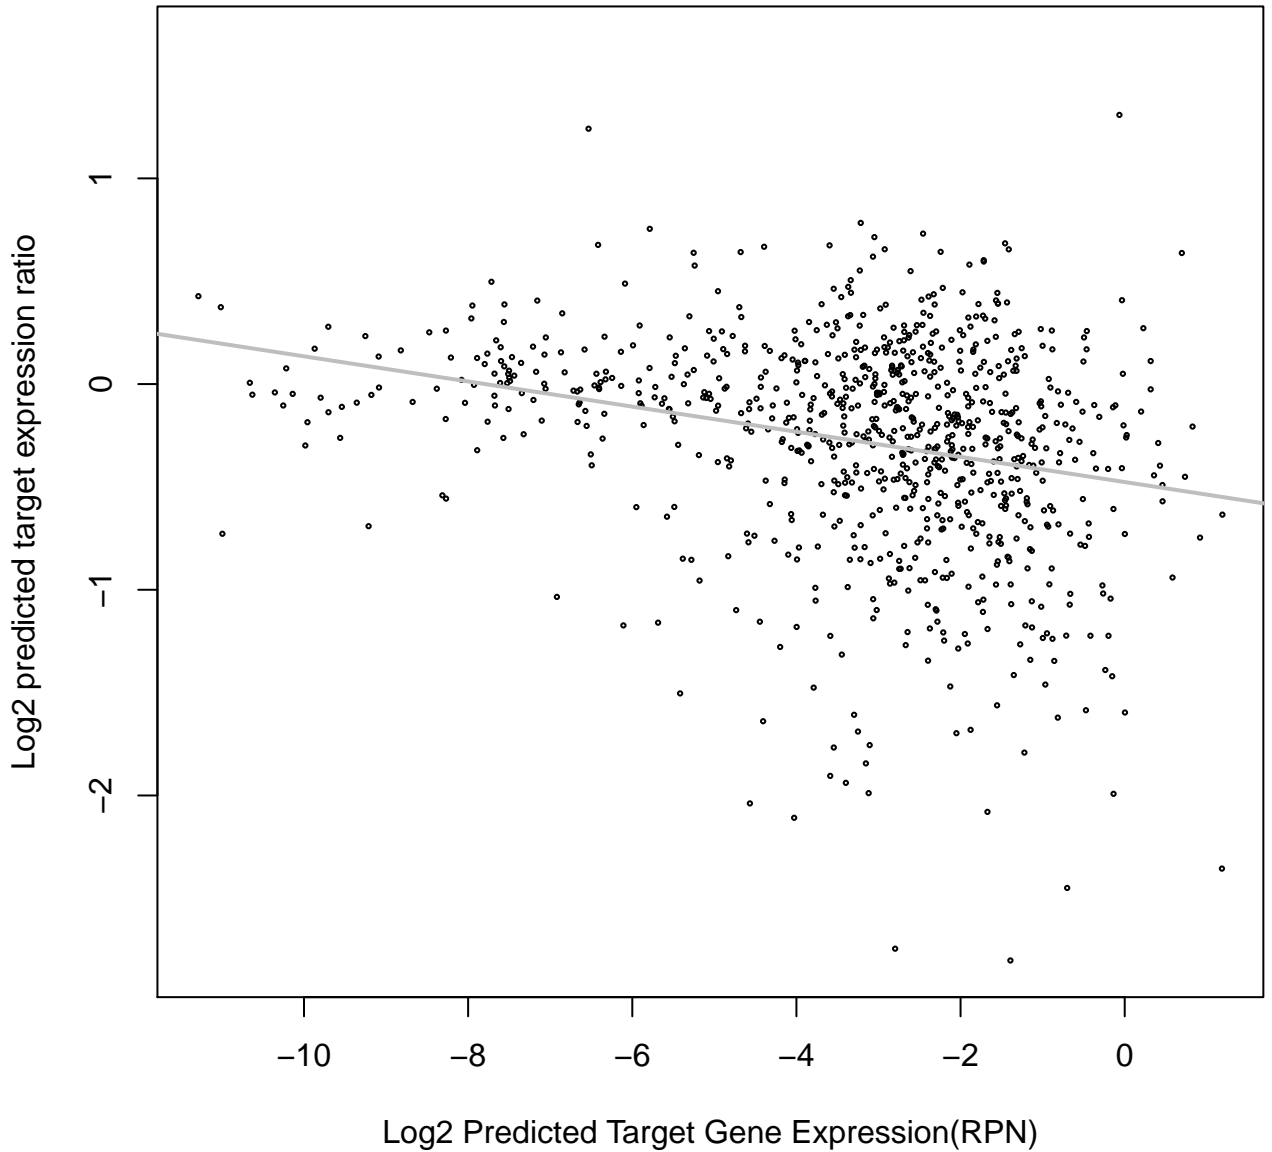

# selbach-22 - miR16

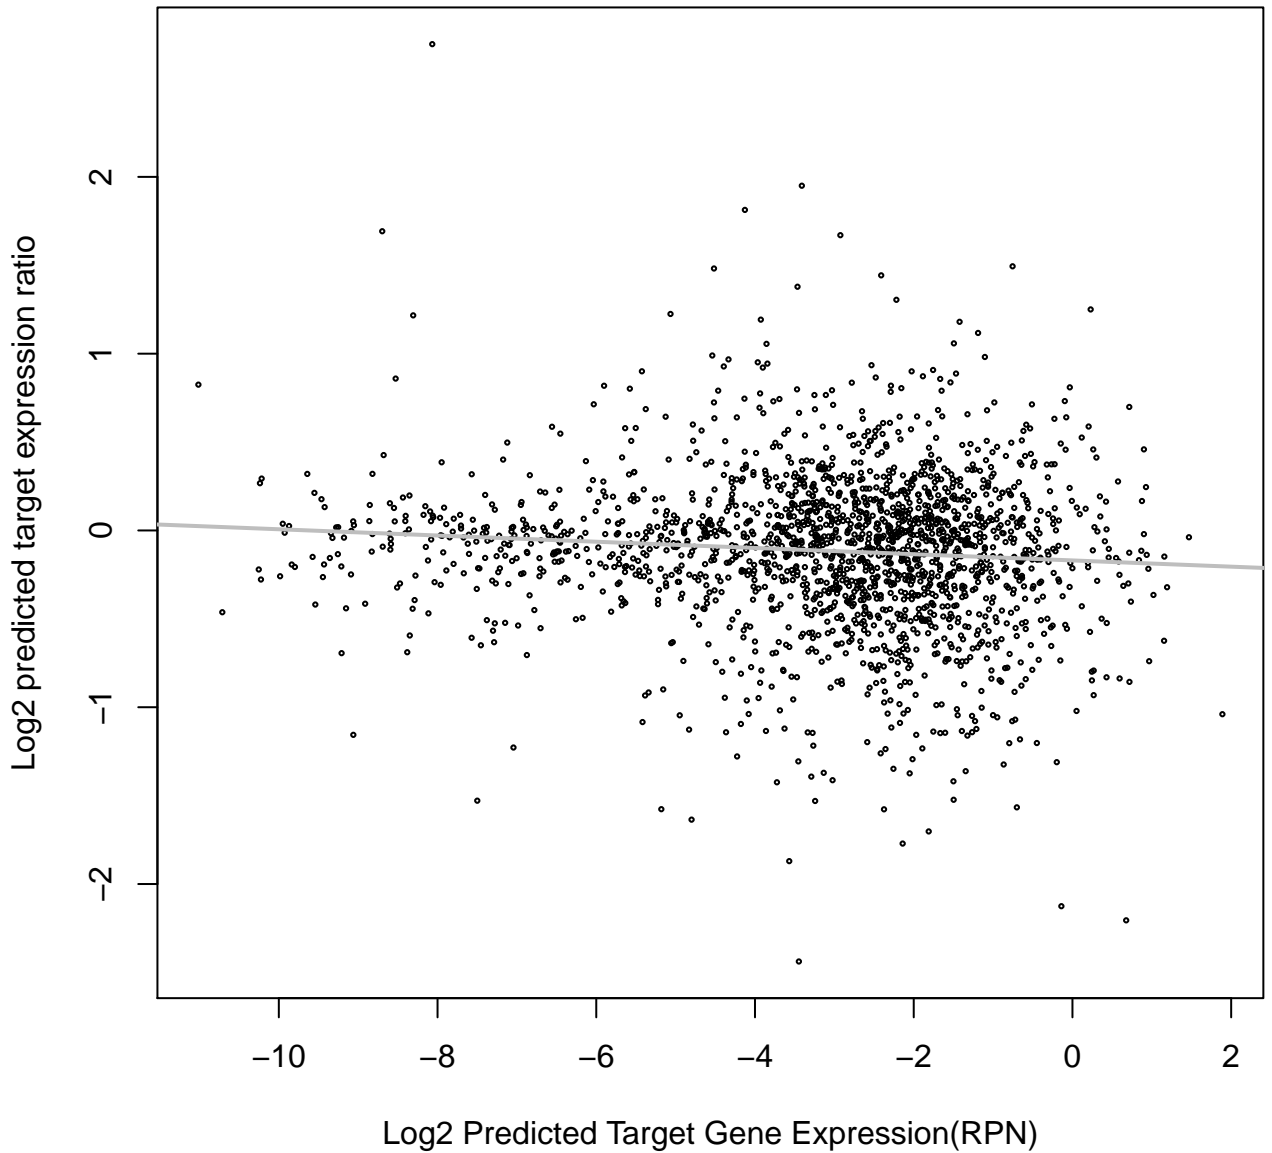

# selbach-23 - let7b

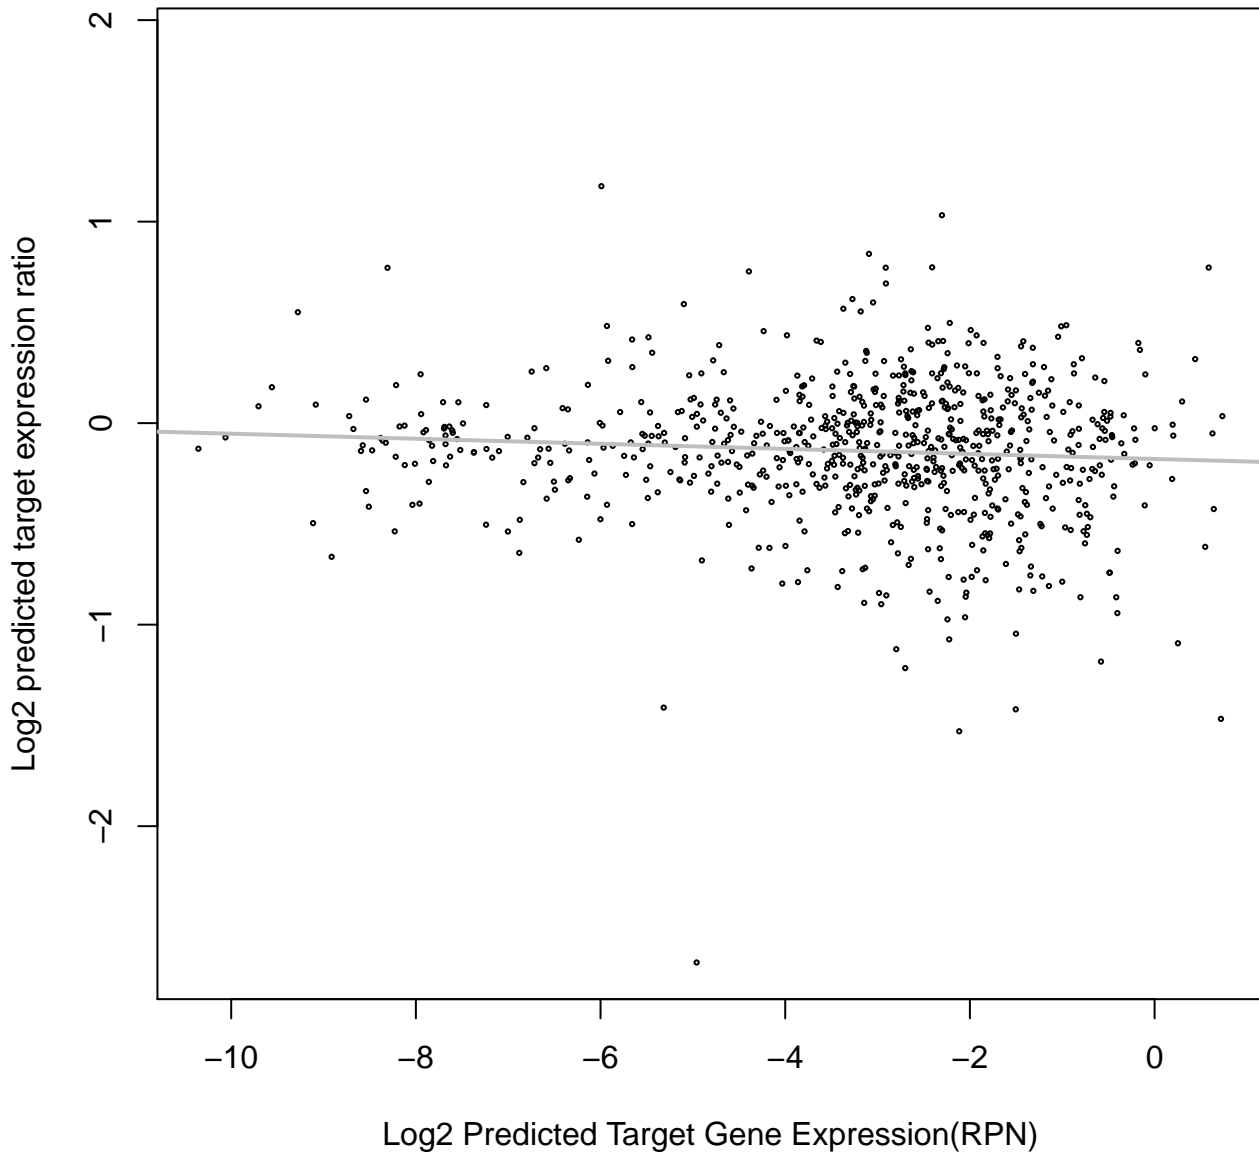

# sod1.snp-82 - siSOD1-P1

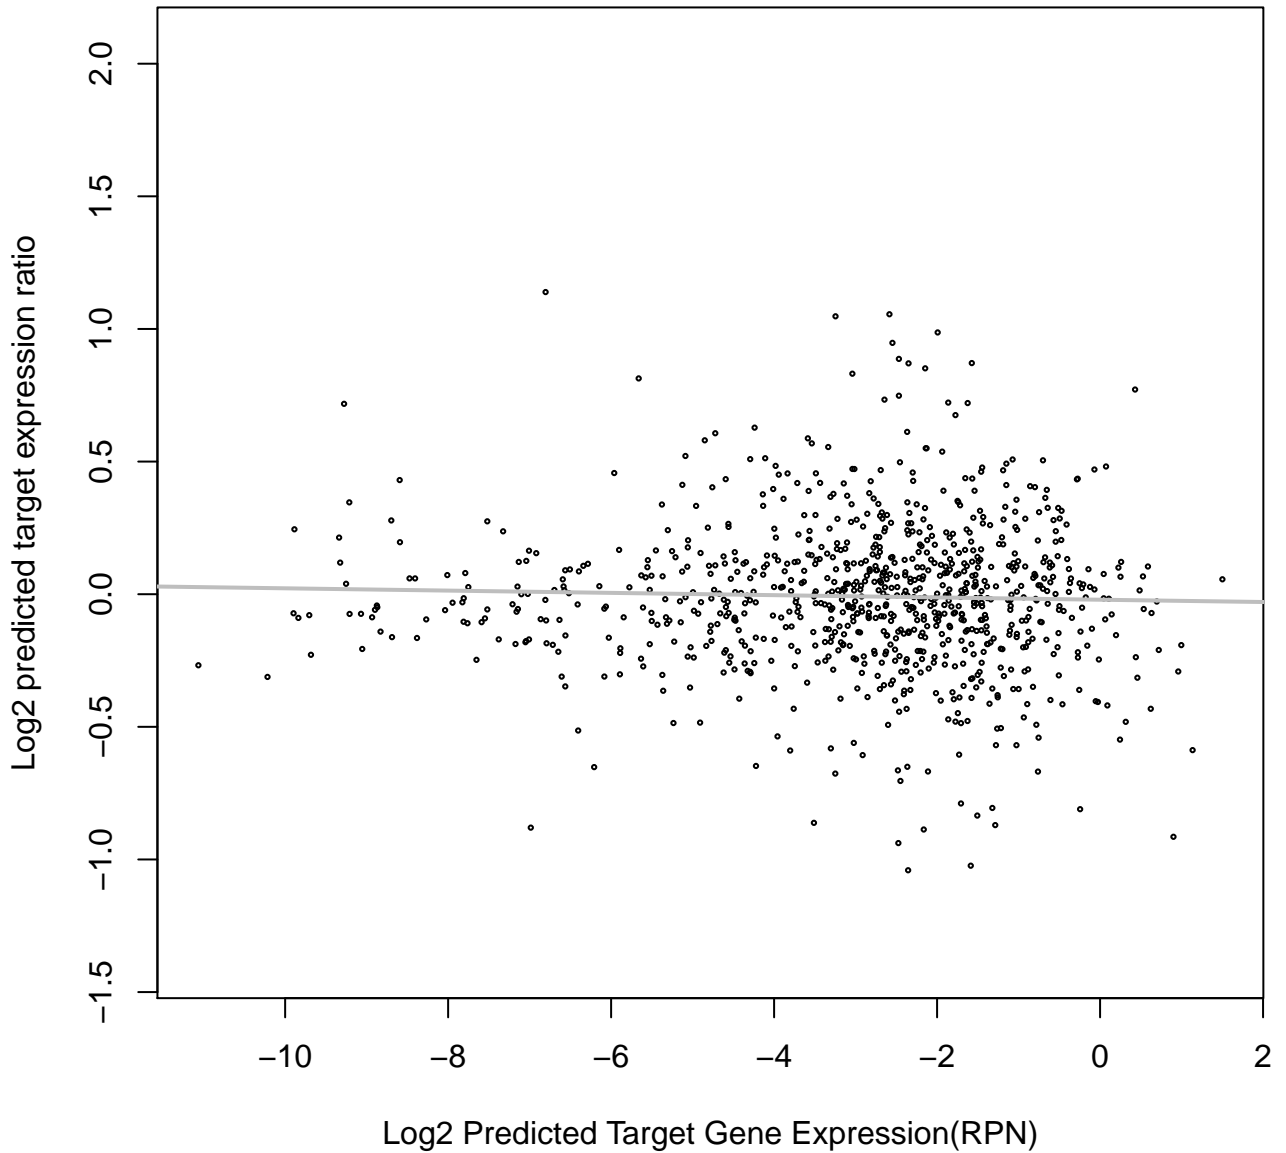

# sod1.snp-83 – siSOD1-P2

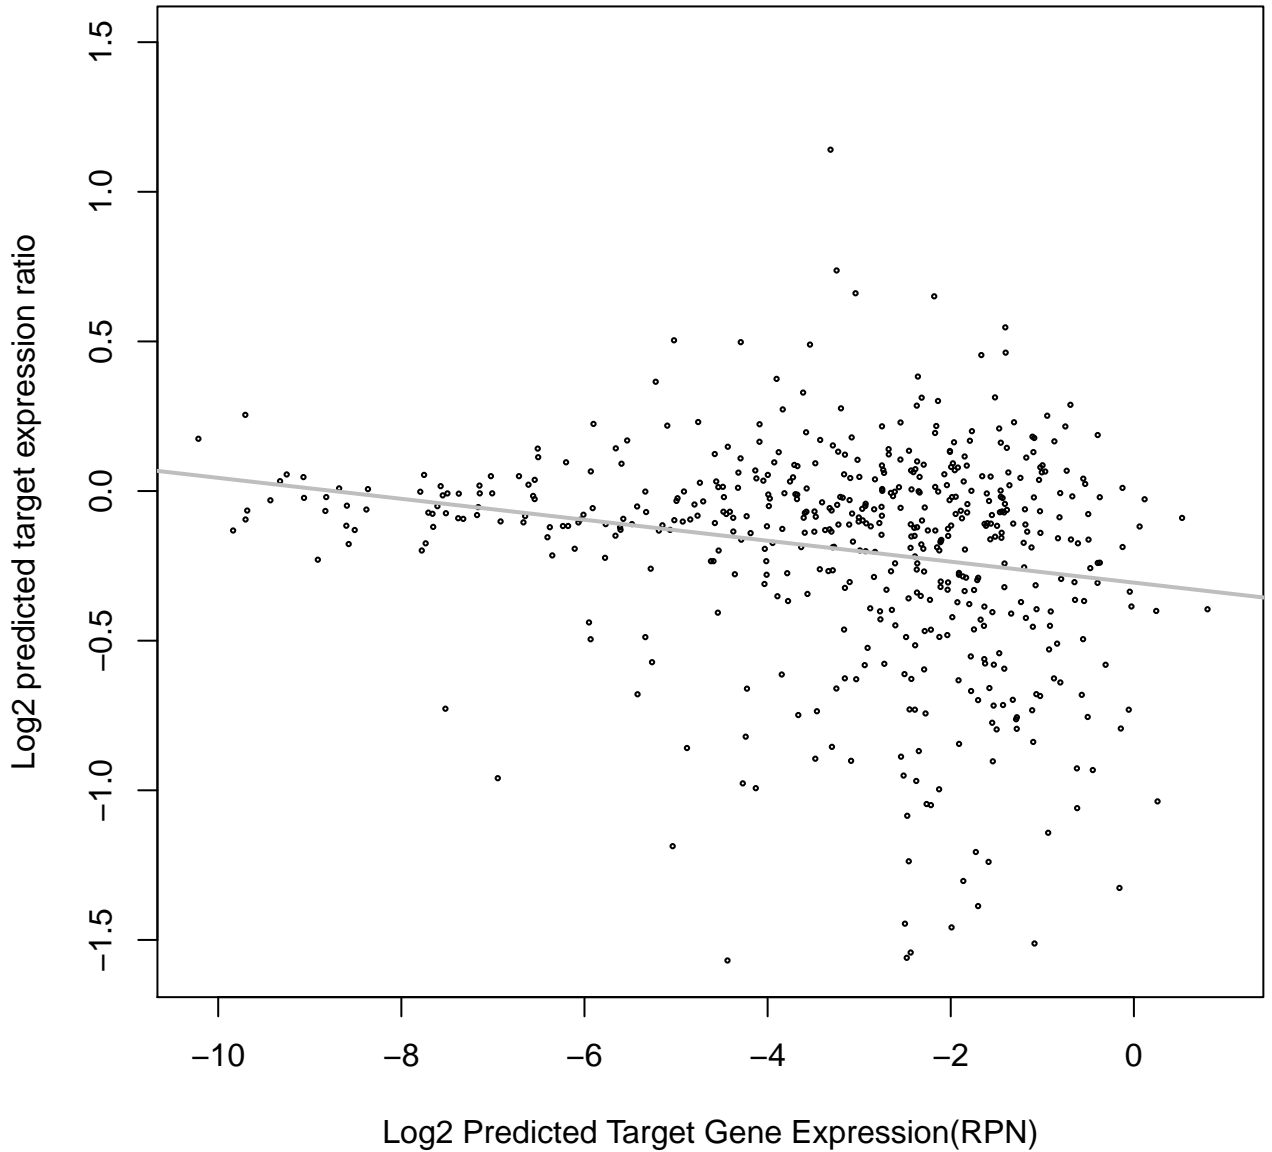

# sod1.snp-84 – siSOD1-P3

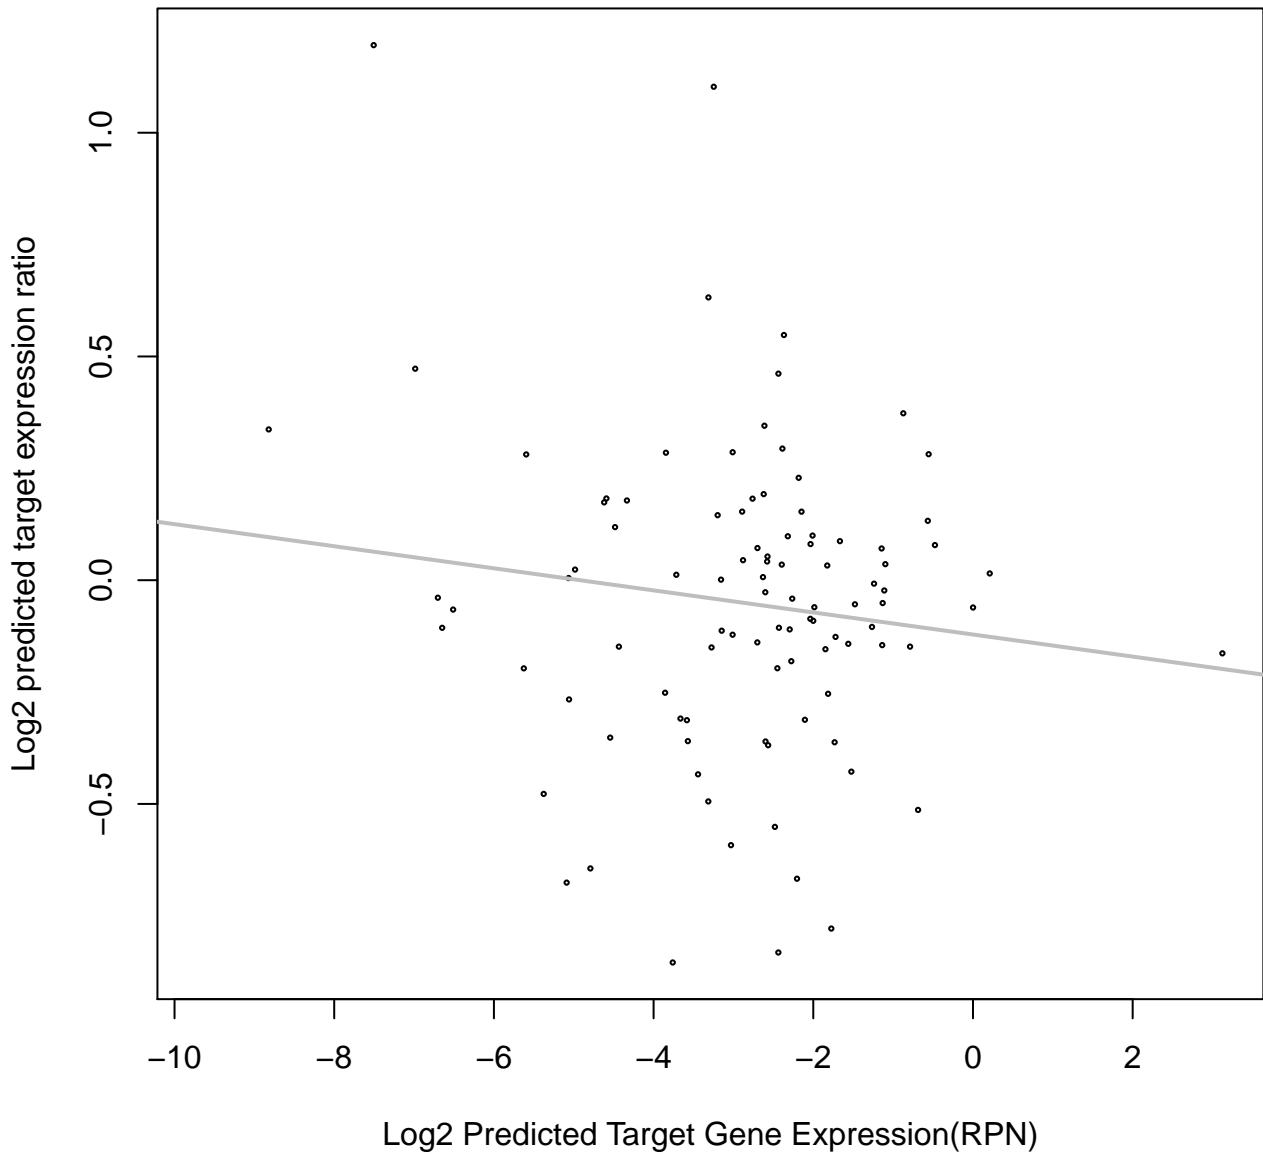

# sod1.snp-85 - siSOD1-P4

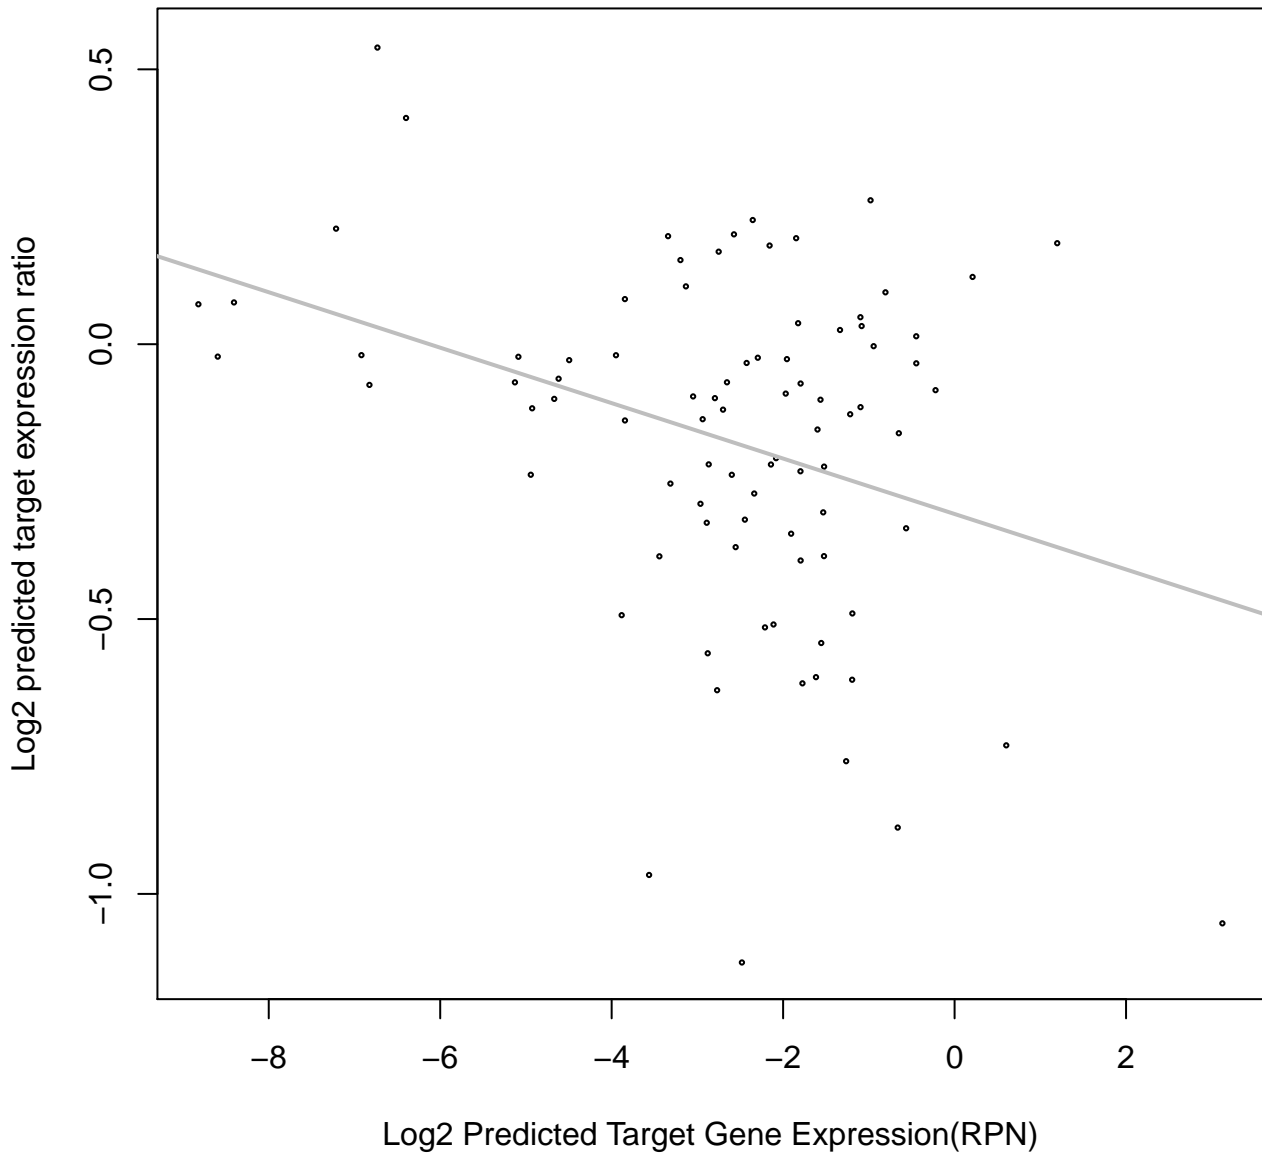

# sod1.snp-86 - siSOD1-P5

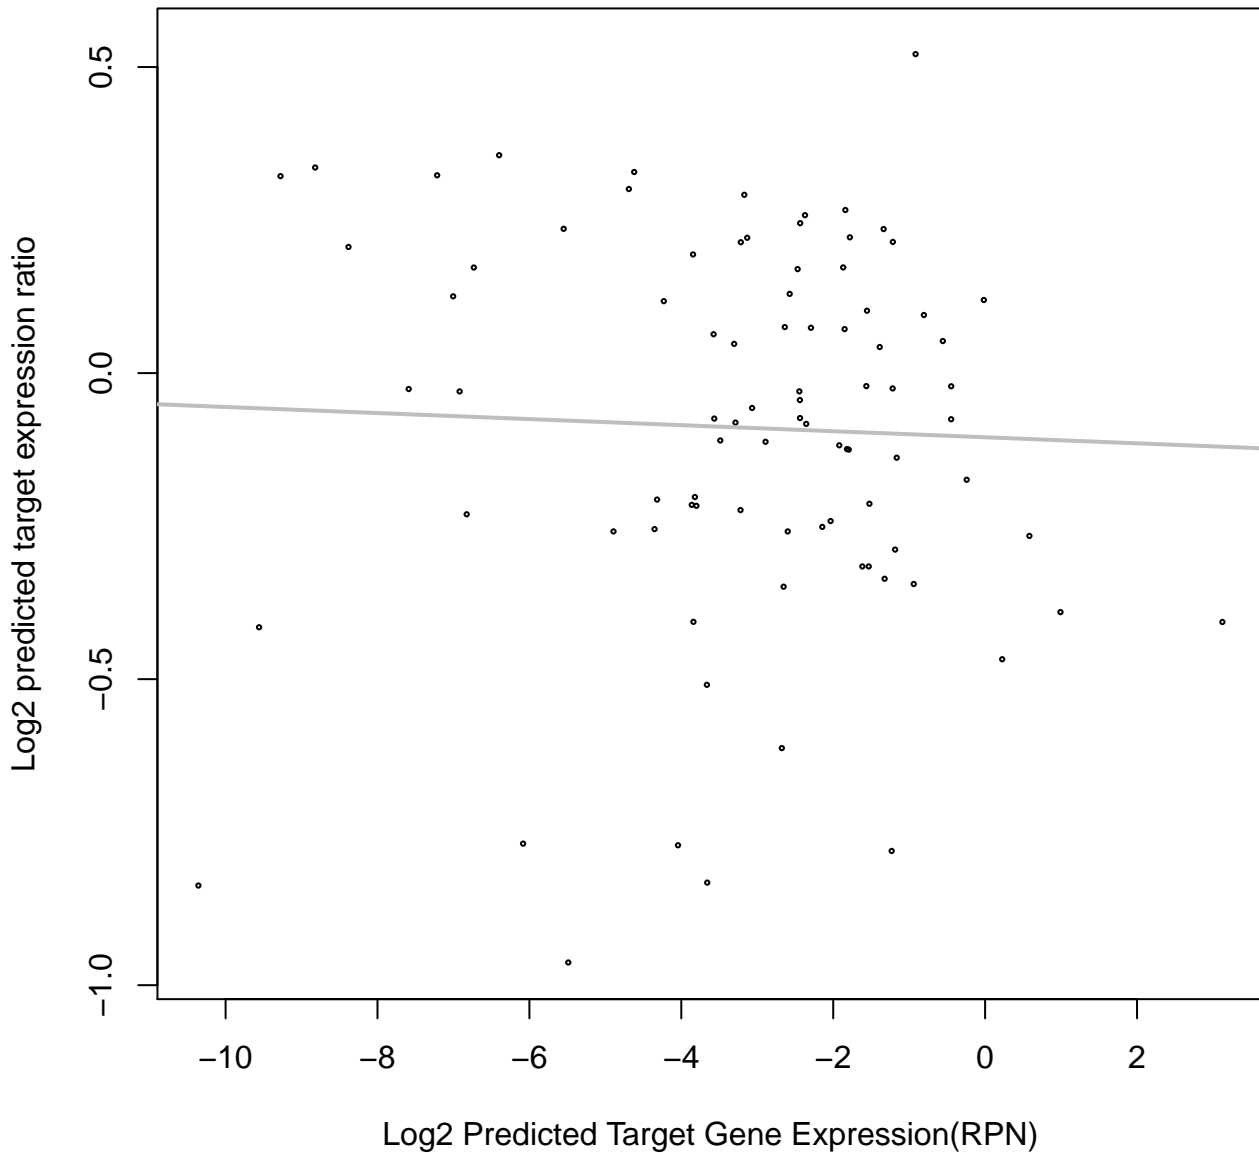



# sod1.snp-87 – siSOD1-P6

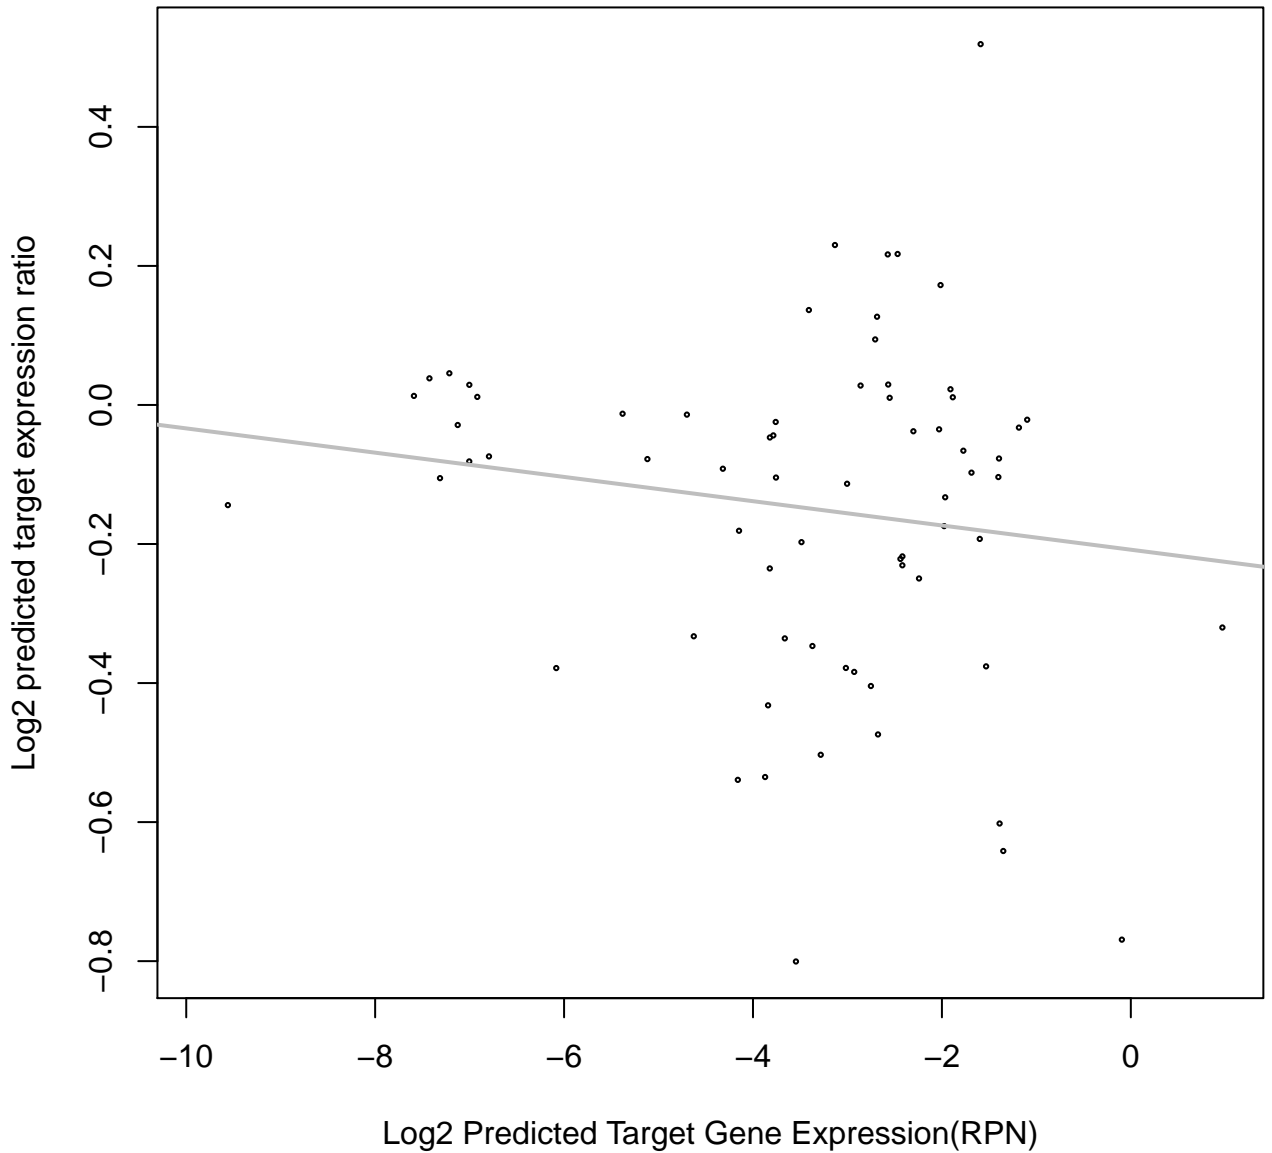

# sod1.snp-88 - siSOD1-P7

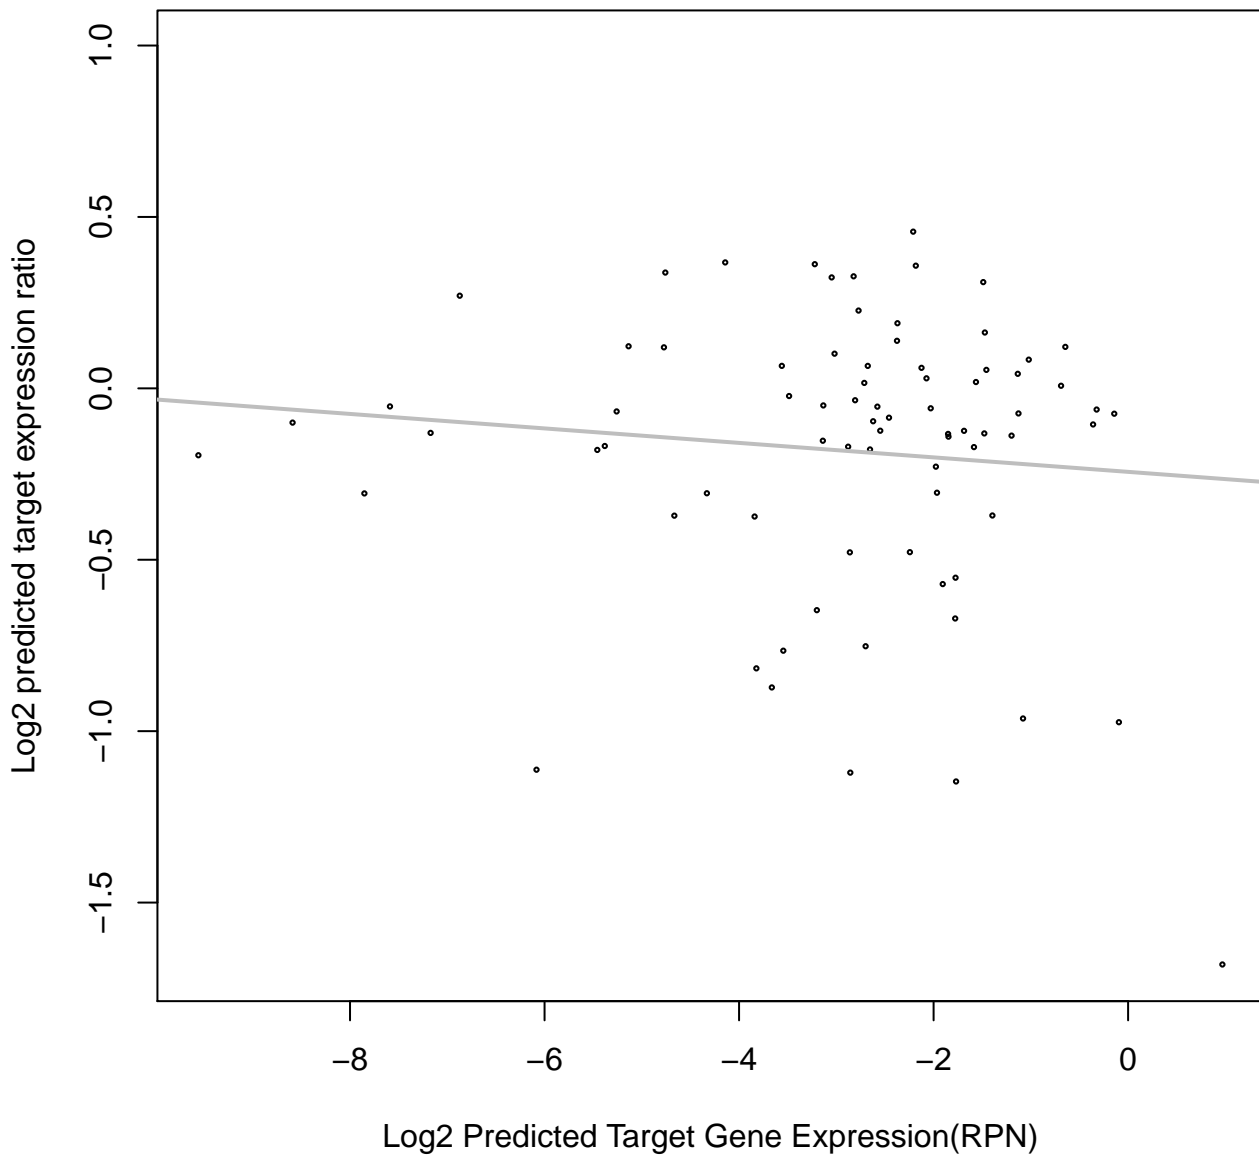

# sod1.snp-89 – siSOD1-P8

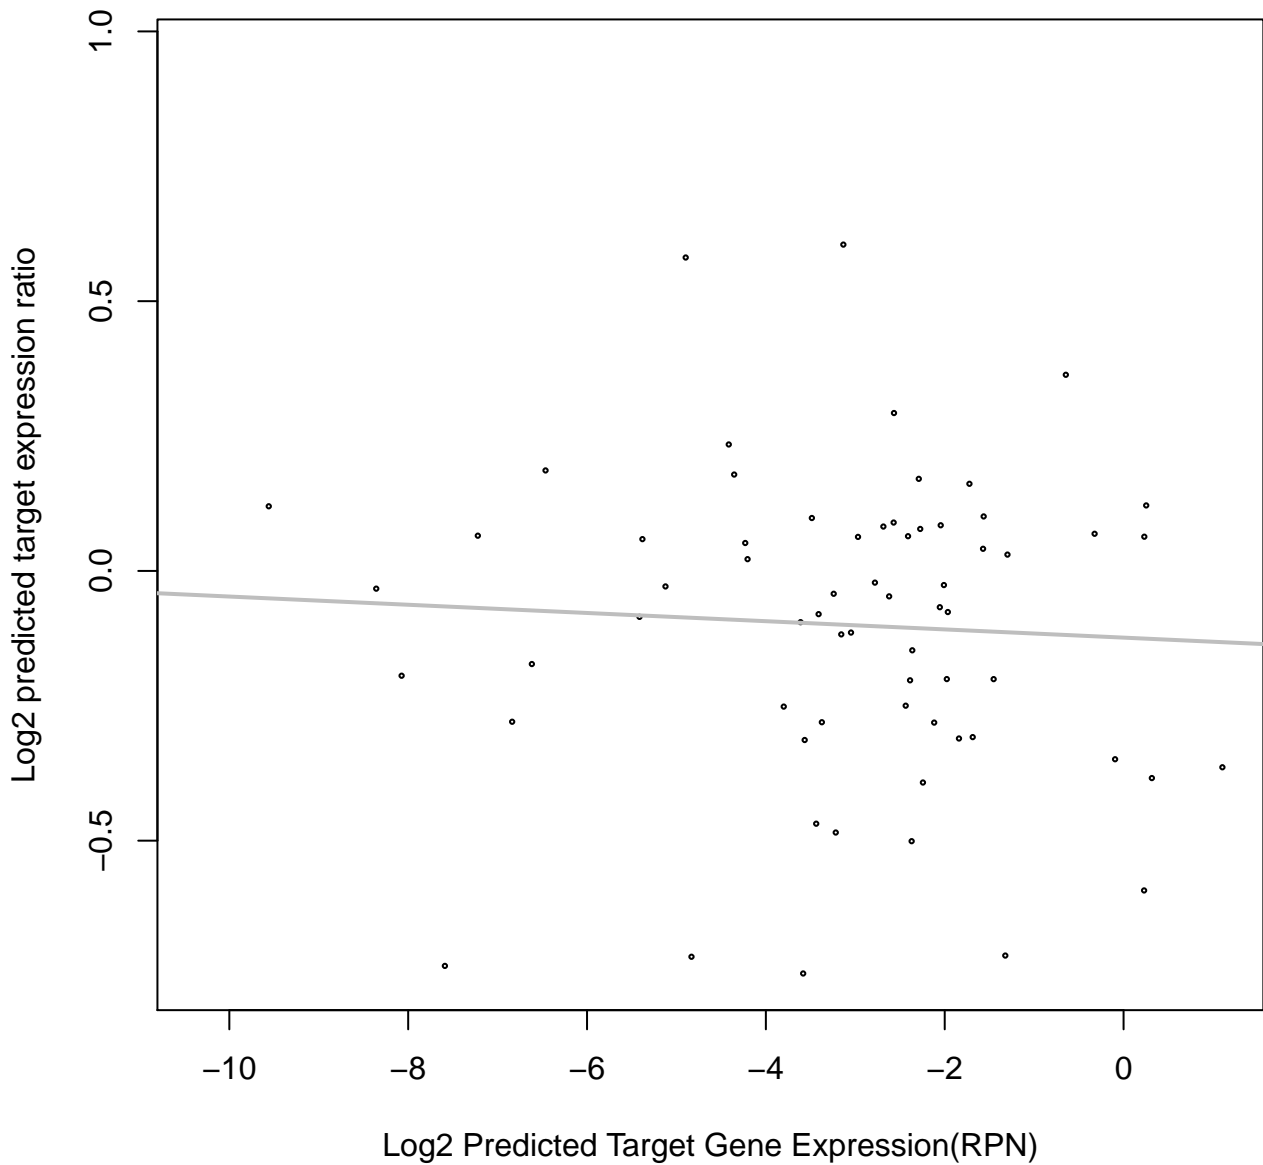

# sod1.snp-90 - siSOD1-P9

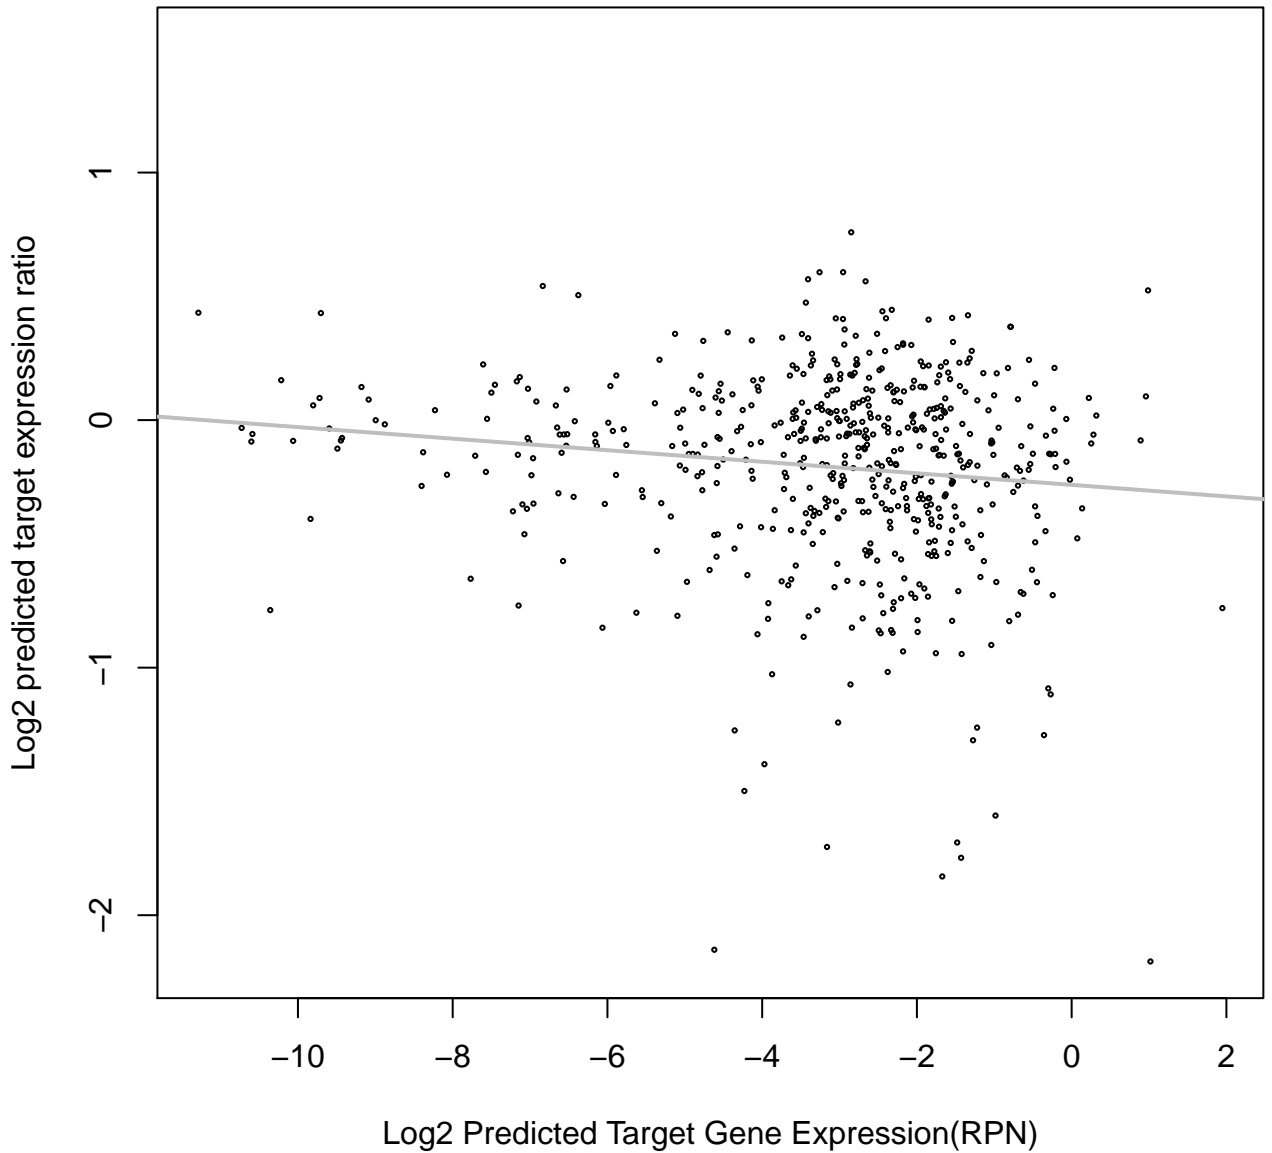

# sod1.snp-91 - siSOD1-P10

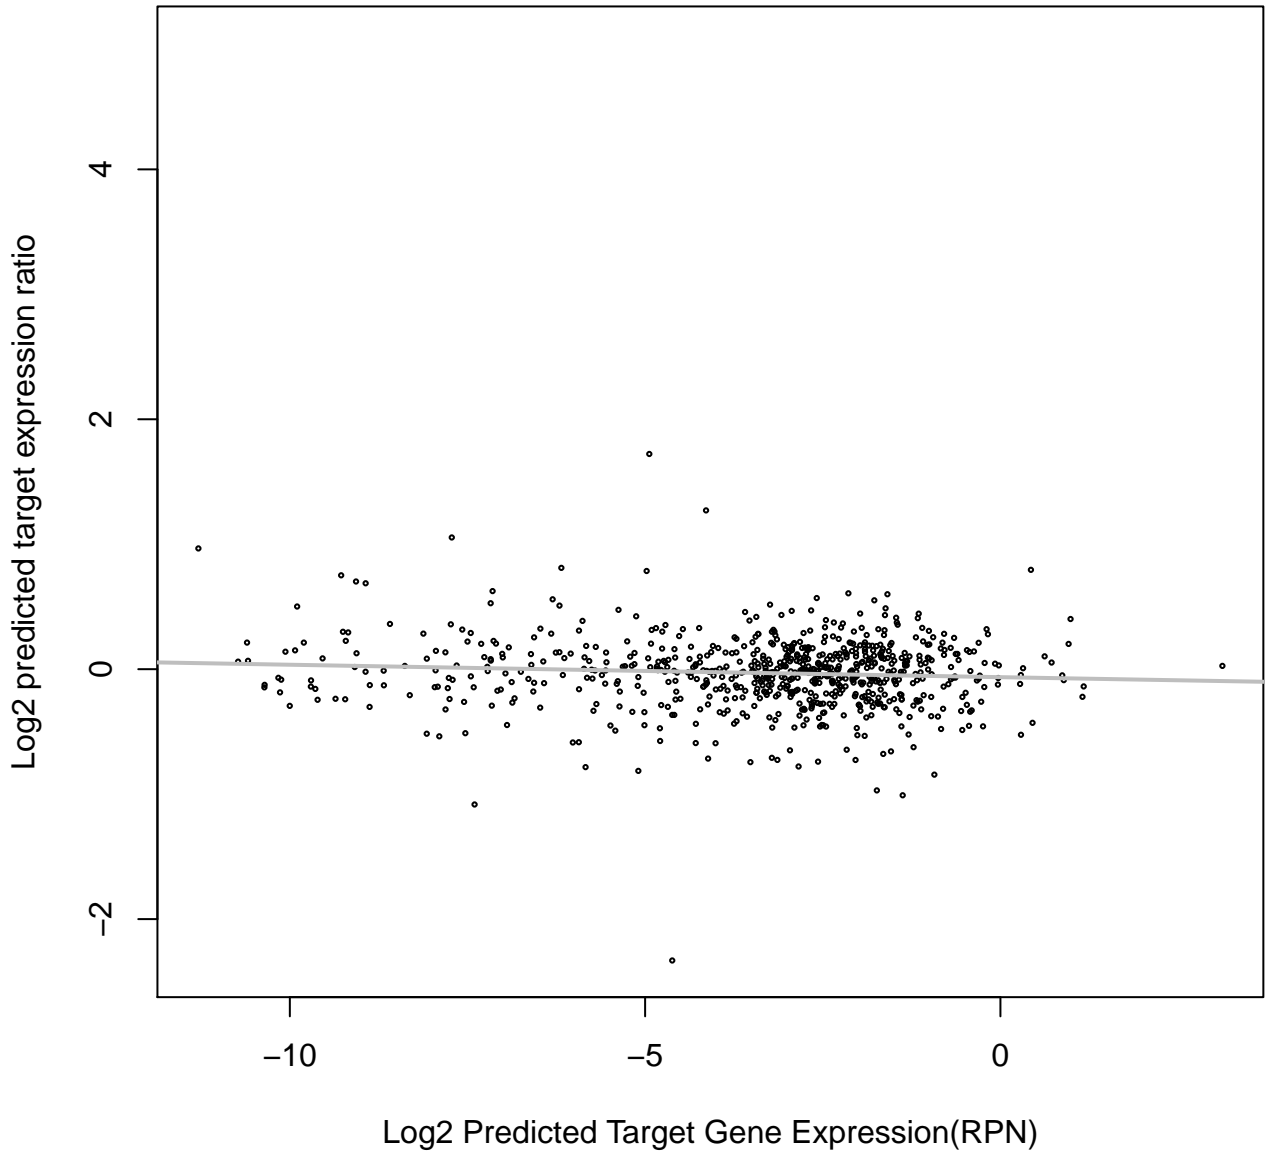

# sod1.snp-92 - siSOD1-P11

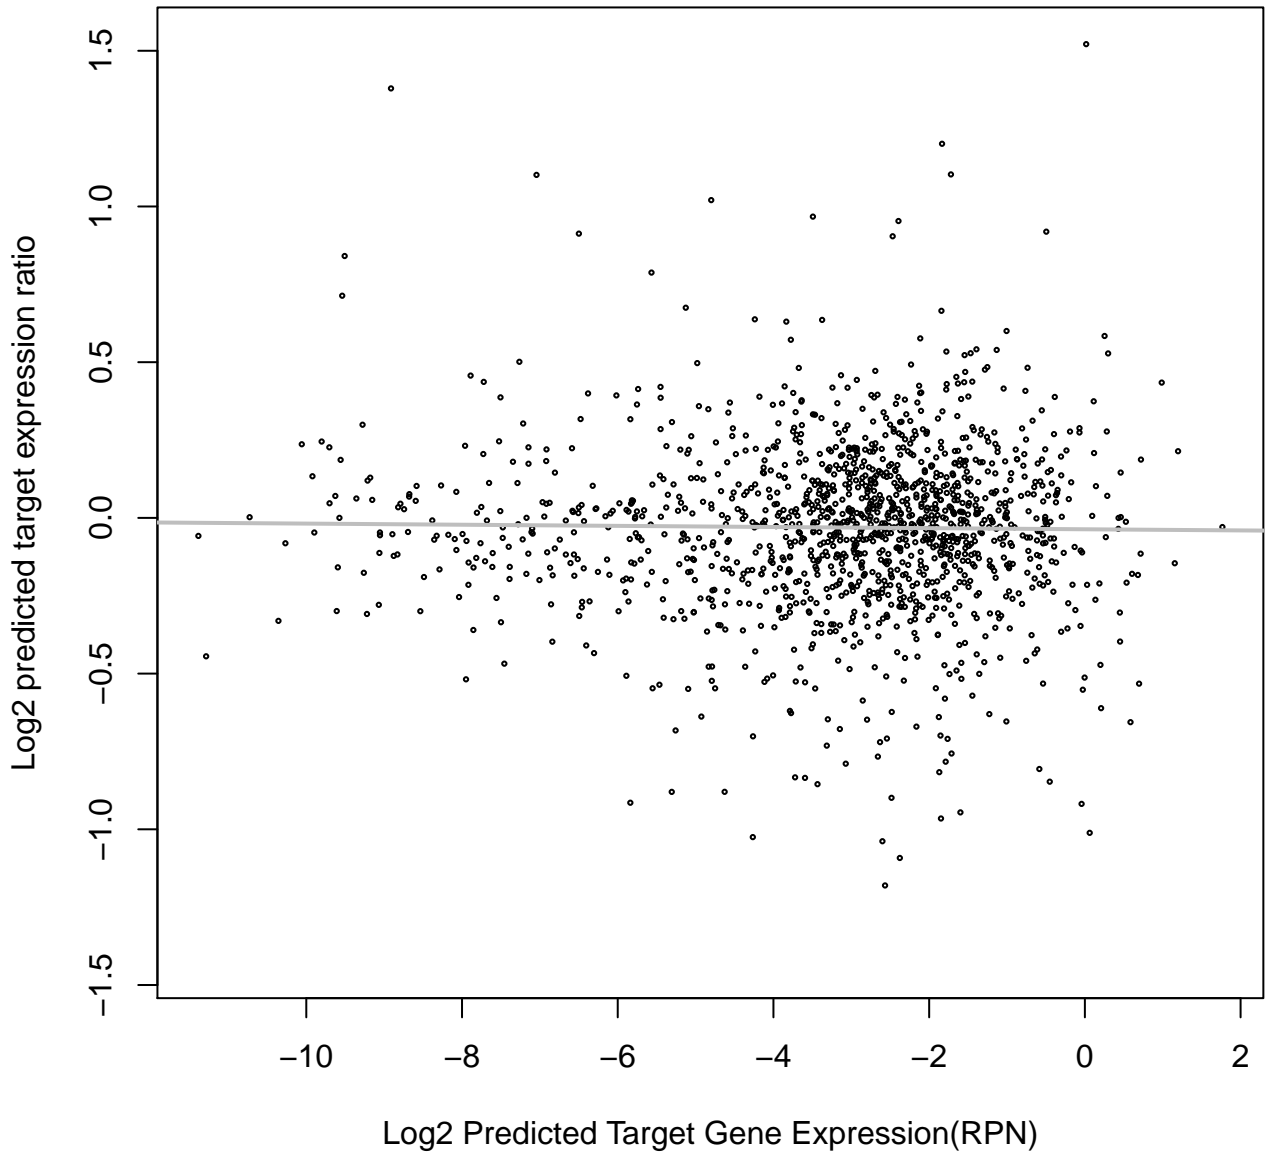

# sod1.snp-93 – siSOD1-P12

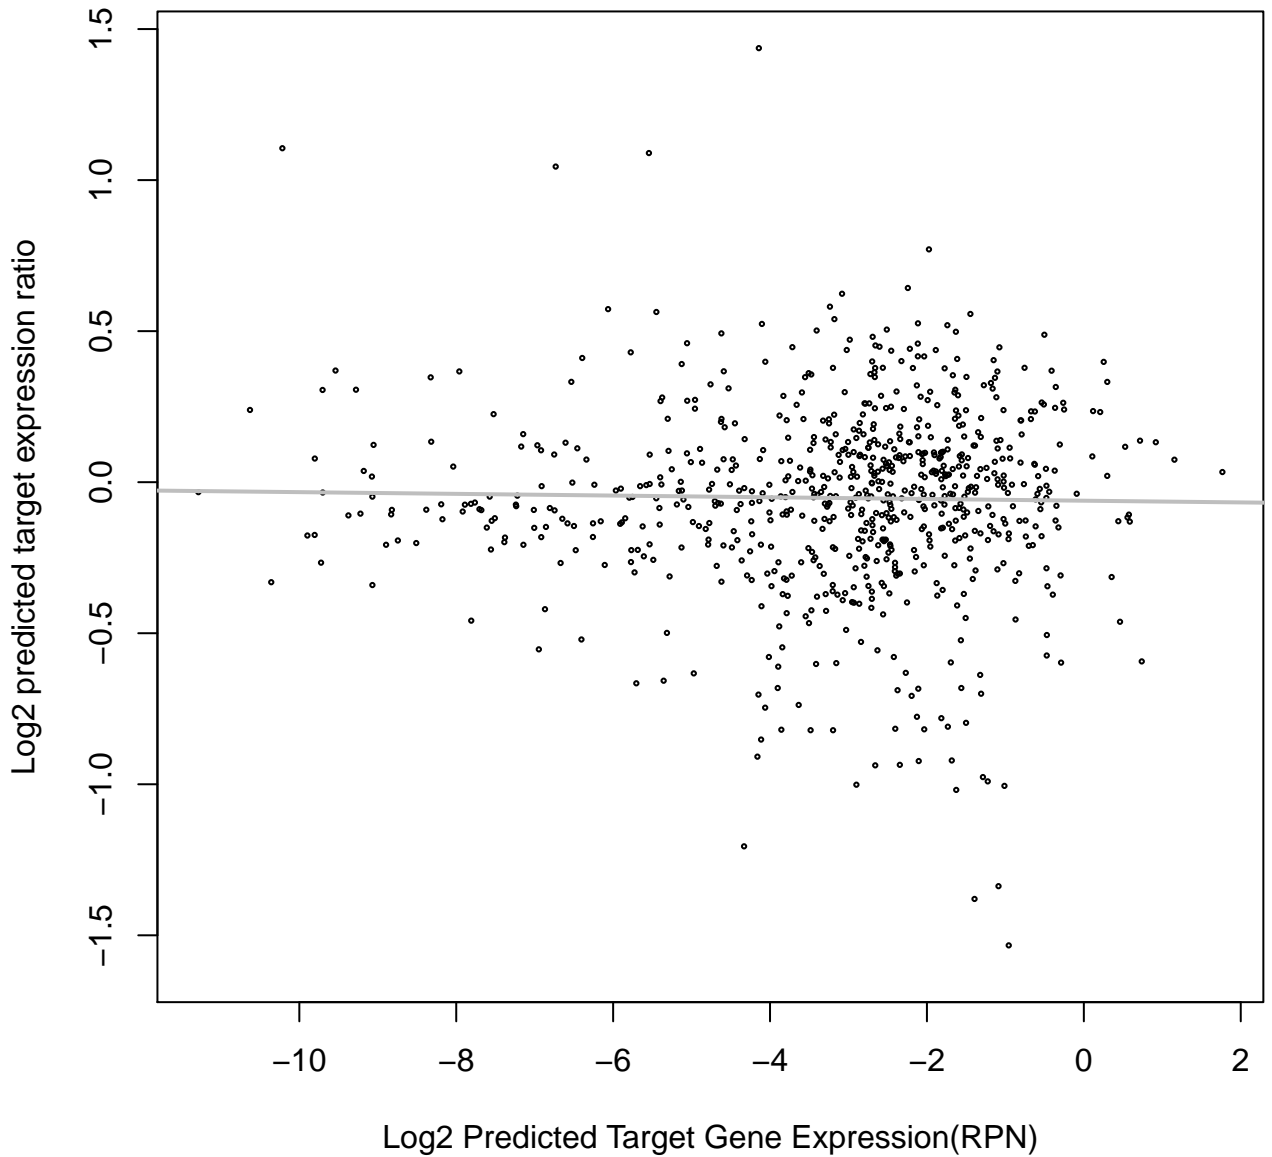

# sod1.snp-94 - siSOD1-P13

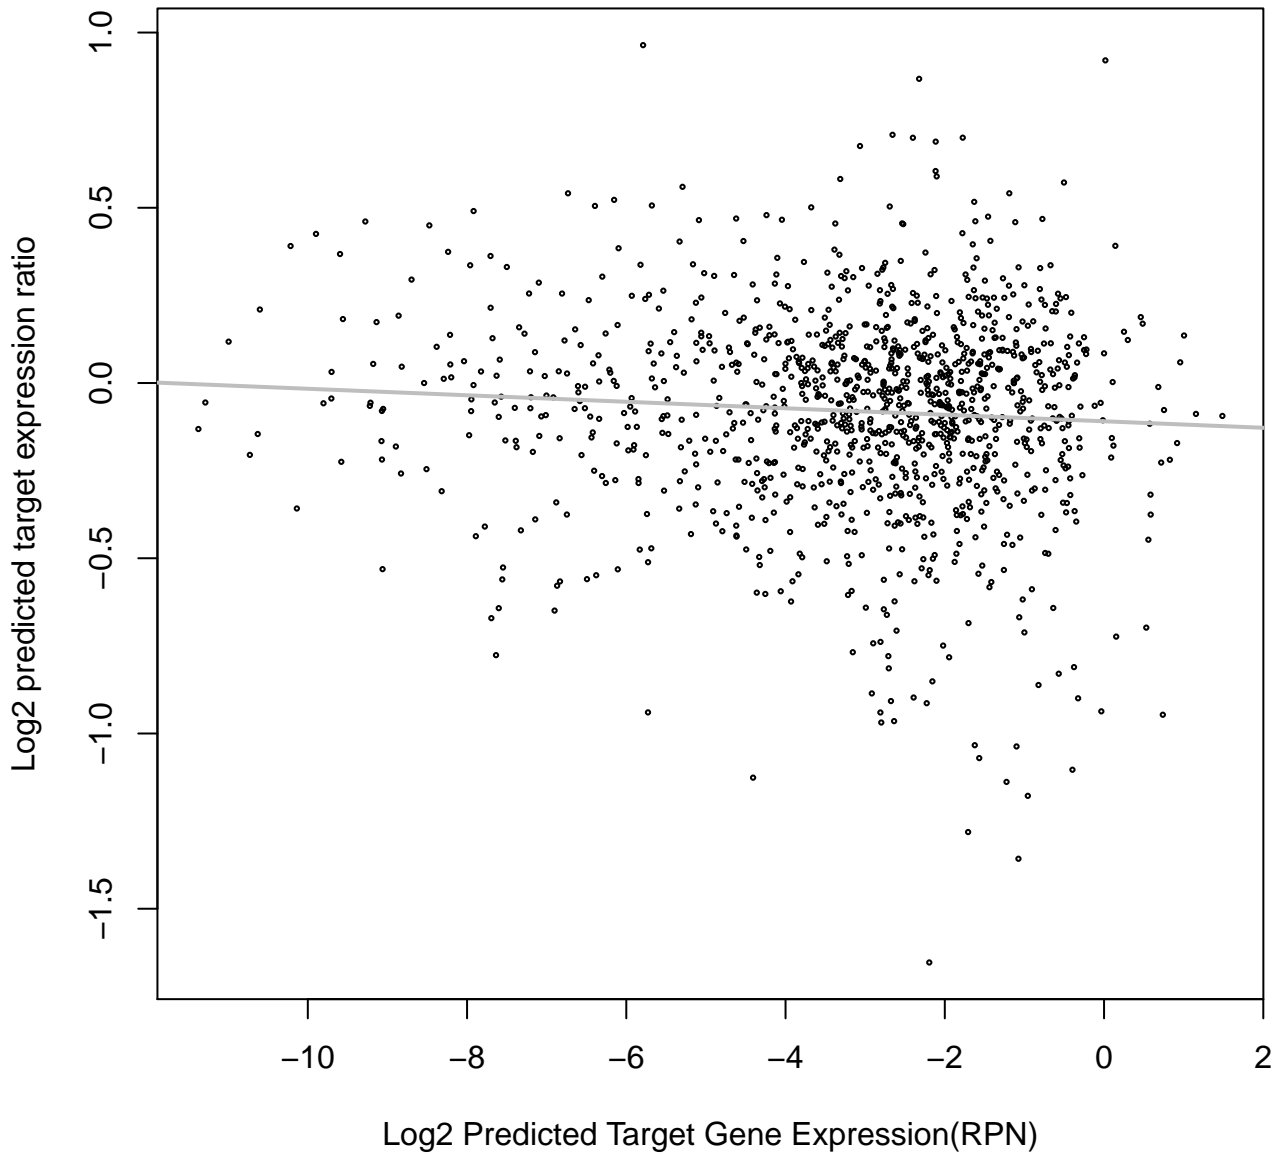



# sod1.snp-95 – siSOD1-P14

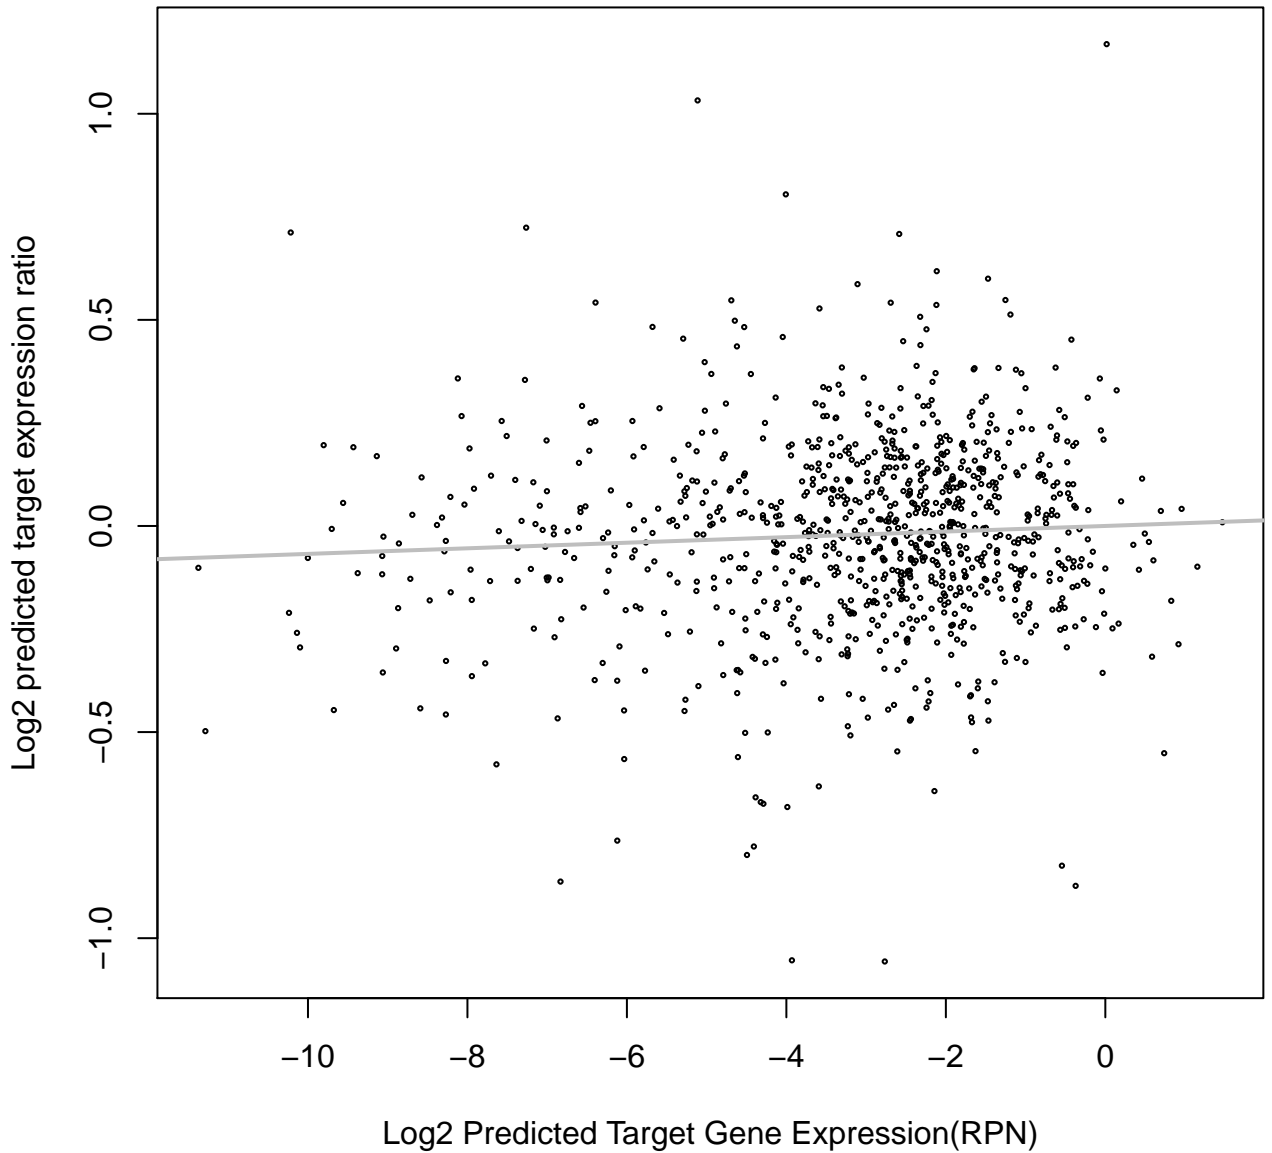

# sod1.snp-96 - siSOD1-P15

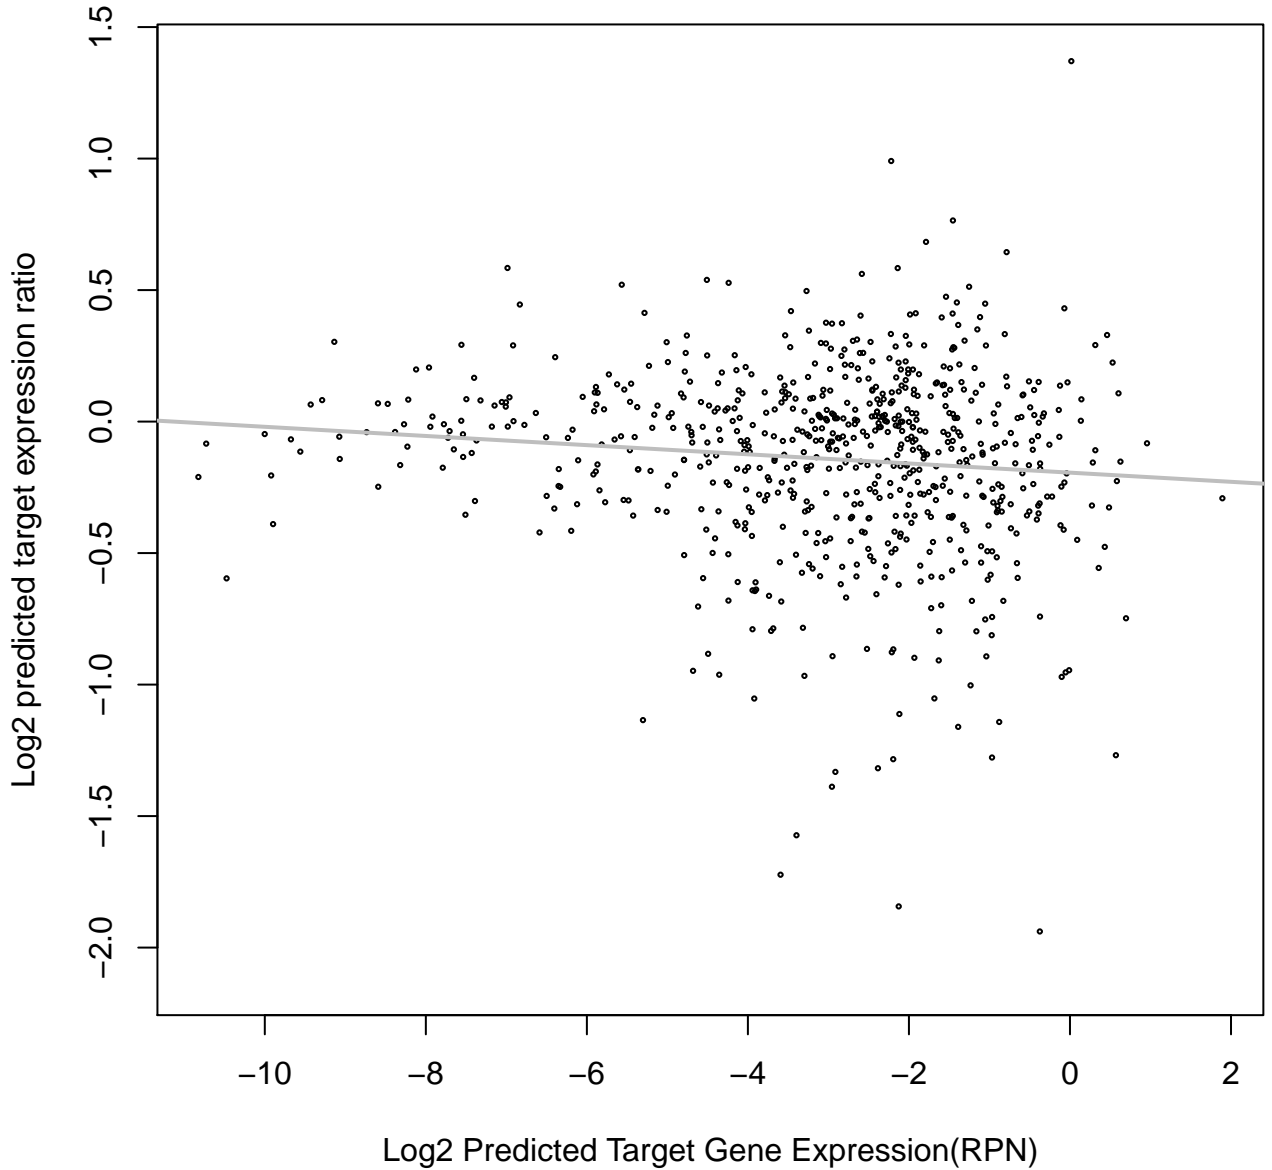

# sod1.snp-97 – siSOD1-P16

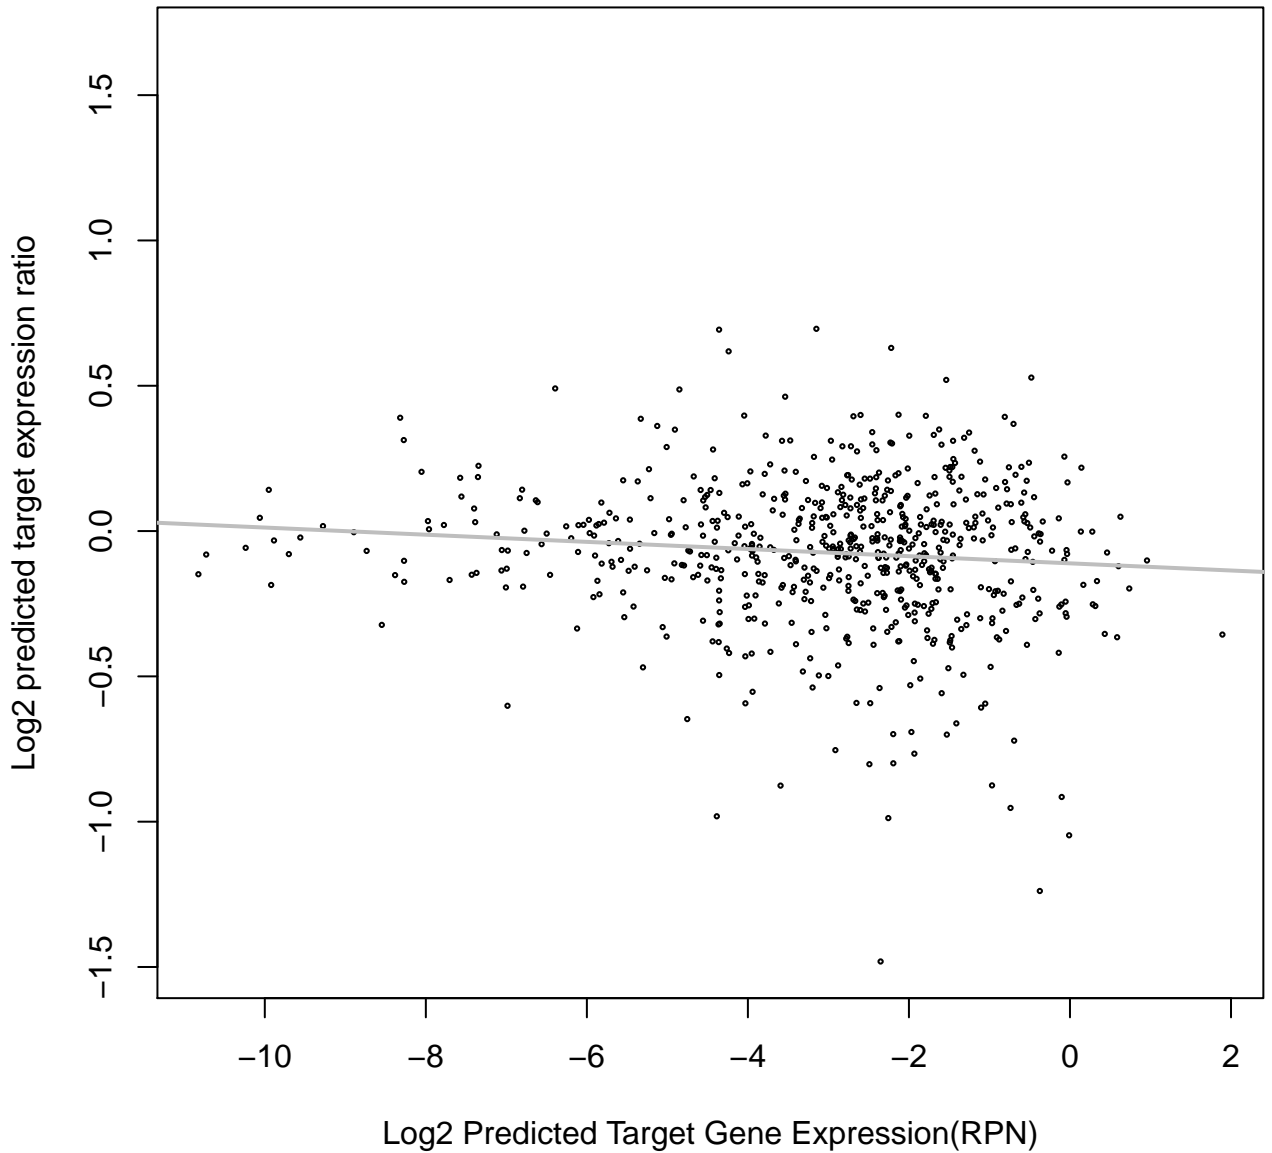

# sod1.snp-98 - siSOD1-P18

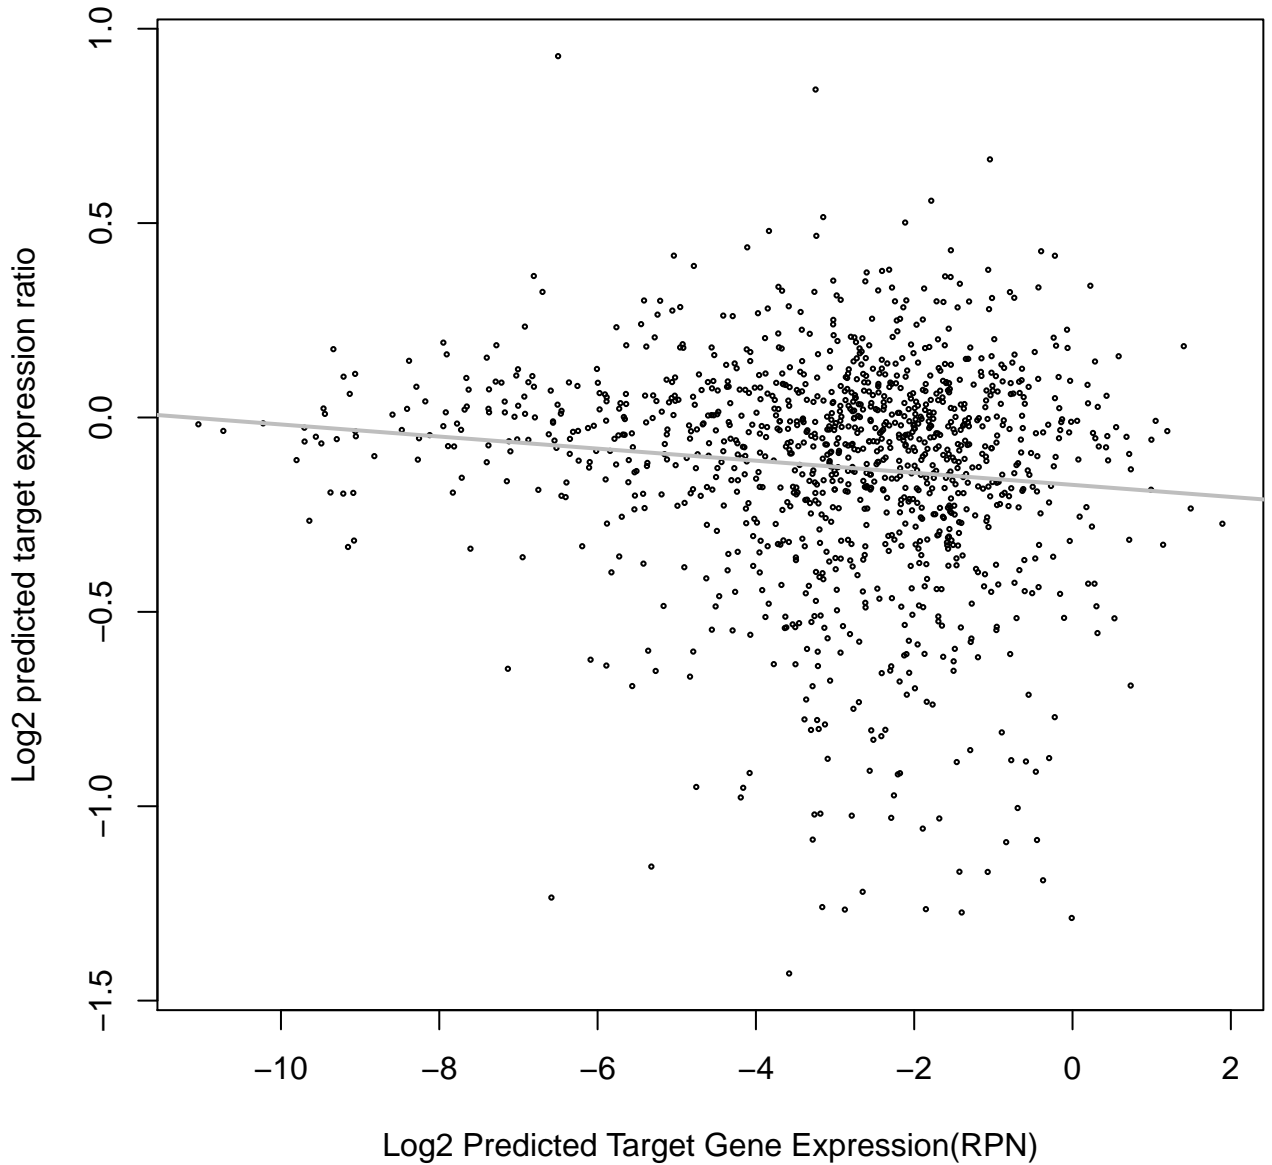

# sod1.snp-99 – siSOD1-P19

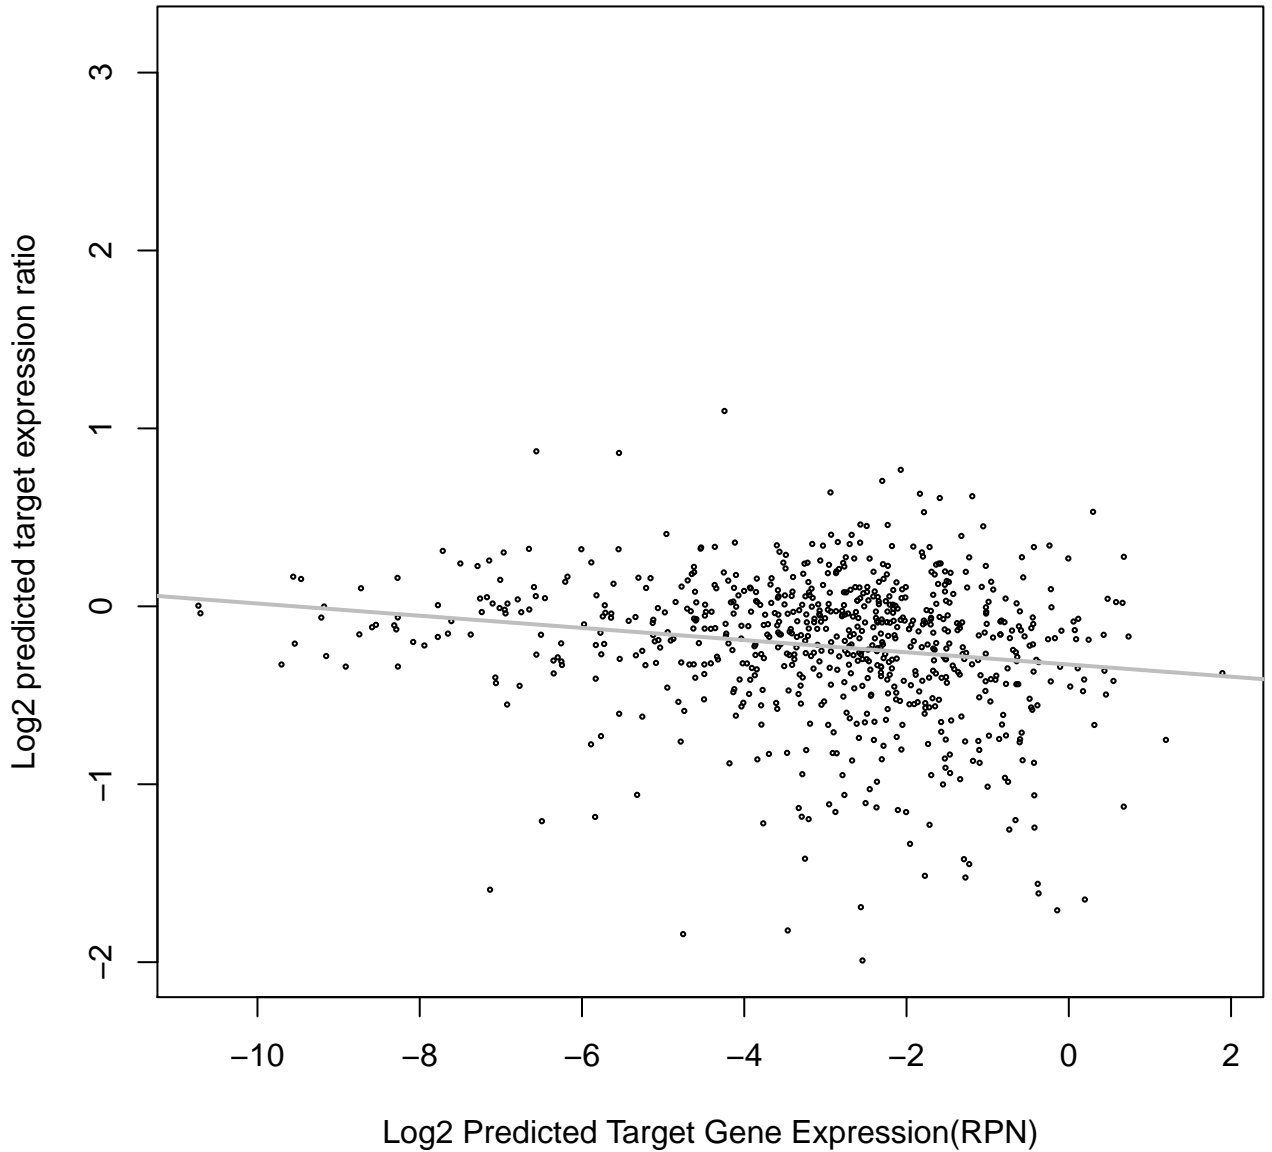

Supplement: msb201024-s2.pdf [file msb201024-s2.pdf]
